# Supplementary material for: Metabolic Reprogramming and Tunneling Nanotubes Cooperate to Regulate HIV-1 Latency Reactivation
Source: Research Square preprint supplement (doi:10.21203/rs.3.rs-8529866/v1), 2026-01-21
Supplement: Supplementary file 1 [file 1024391b6ed62bf454973e2c.pdf]

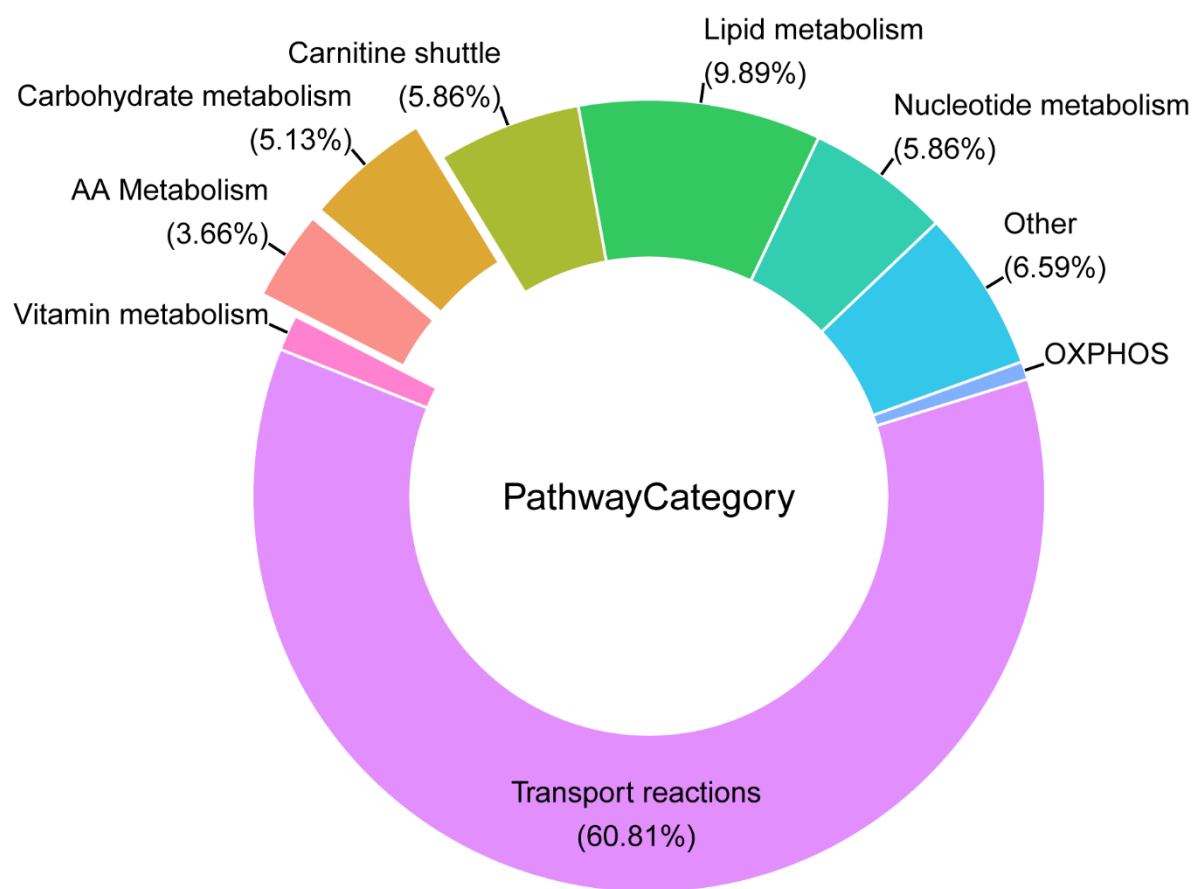

**Figure S1.** Unique metabolic reactions during latency reactivation.

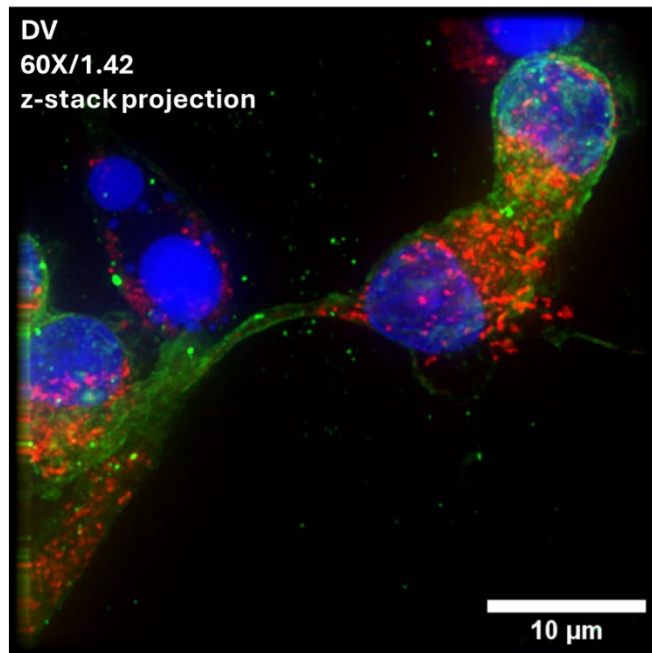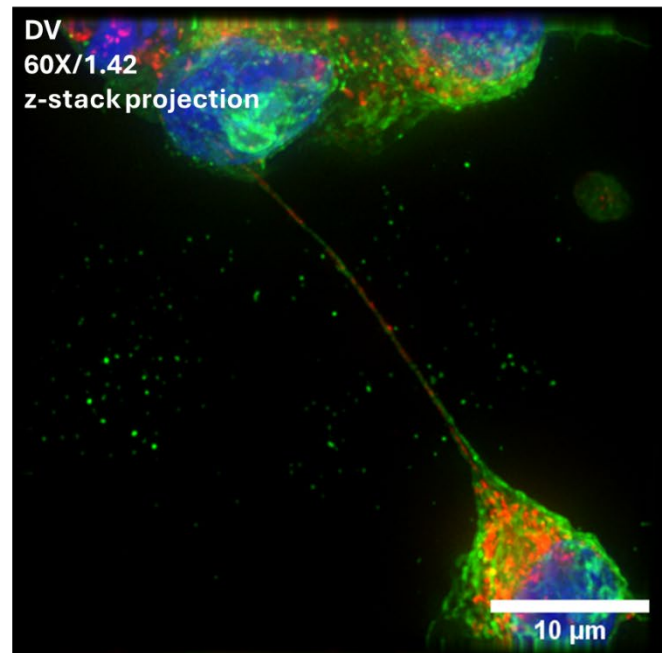

**Figure S2.** Formation of tunneling nanotubes (TNTs) during viral reactivation. Red GLA, Green: HIV p24 and Blue: Dapi

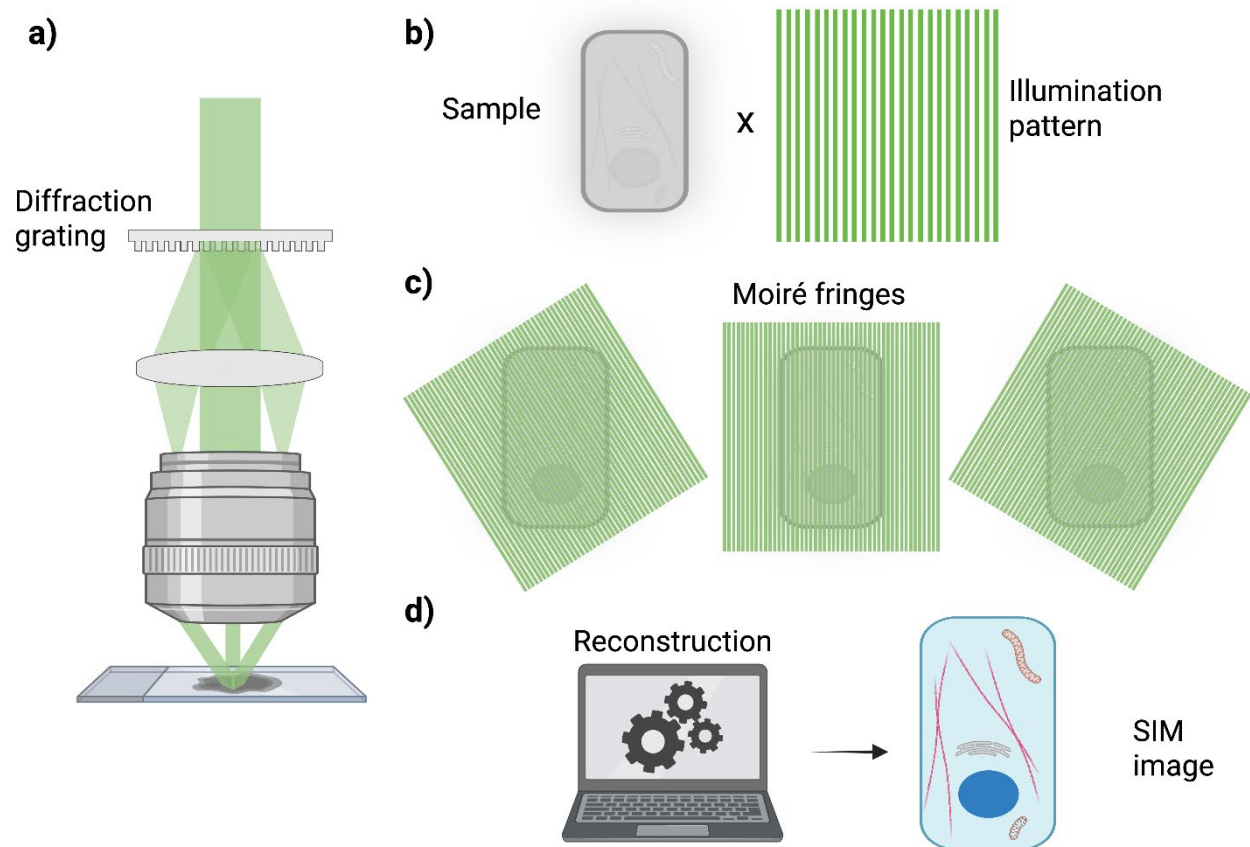

Figure S3. A custom-built QPM system working on Linnik interference configuration used for SIM analysis.

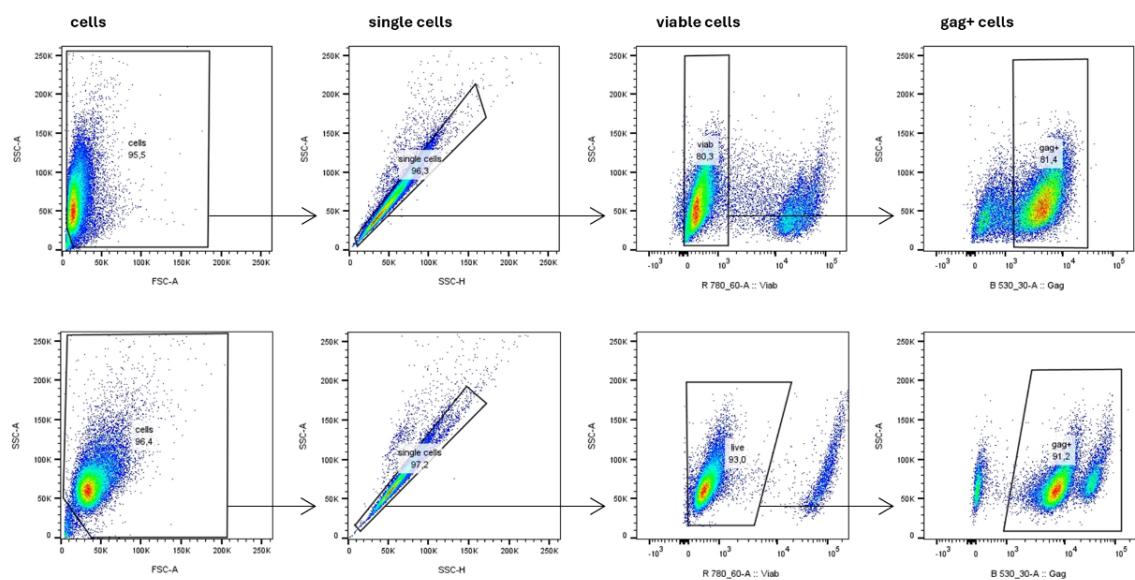

**Figure S4. Gating strategy**
