# Supplementary material for: Metabolic Reprogramming and Tunneling Nanotubes Cooperate to Regulate HIV-1 Latency Reactivation
Source: Research Square preprint supplement (doi:10.21203/rs.3.rs-8529866/v1), 2026-01-21
Supplement: Supplementary file 2 [file 266e3774035d6d1afef20b28.docx]

The mass spectrometry proteomics data have been deposited to the ProteomeXchange Consortium (http://proteomecentral.proteomexchange.org) via the PRIDE partner repository with the dataset identifier PXD065437 (Username: reviewer_pxd065437@ebi.ac.uk, Password: M0Iinol8S2gV).

RNAseq Count File is available at 10.6084/m9.figshare.31064563
