# Supplementary material for: Metabolic Reprogramming and Tunneling Nanotubes Cooperate to Regulate HIV-1 Latency Reactivation
Source: Research Square preprint supplement (doi:10.21203/rs.3.rs-8529866/v1), 2026-01-21
Supplement: Supplementary file 3 [file 2c804bdb620ce3cd6c3fcee8.xlsx]

## Sheet: U1_PMA_vs_U937_PMA
Name	Genes (tot)	Stat (dist.dir.up)	p (dist.dir.up)	p adj (dist.dir.up)	Stat (dist.dir.dn)	p (dist.dir.dn)	p adj (dist.dir.dn)	Stat (non-dir.)	p (non-dir.)	p adj (non-dir.)	Genes (up)	Stat (mix.dir.up)	p (mix.dir.up)	p adj (mix.dir.up)	Genes (down)	Stat (mix.dir.dn)	p (mix.dir.dn)	p adj (mix.dir.dn)
STAR	27	22.963	0.000999	0.058067	-5.0862	0.93806	0.99136	41.345	0.000999	0.014985	17	38.09	0.000999	0.038711	10	18.274	0.14685	0.71246
cysteine	67	23.571	0.000999	0.058067	0.82689	0.86314	0.99136	53.295	0.000999	0.014985	42	43.54	0.001998	0.054651	25	30.814	0.018981	0.46454
PPARA	44	23.27	0.000999	0.058067	-9.1077	0.99401	0.9993	40.506	0.001998	0.024449	29	37.444	0.003996	0.10323	15	17.311	0.38561	0.87072
aspartate	50	27.662	0.000999	0.058067	-8.3995	0.99001	0.9993	44.542	0.000999	0.014985	32	43.08	0.000999	0.038711	16	21.92	0.14486	0.71246
histidine	51	23.055	0.000999	0.058067	-4.5326	0.97602	0.9993	44.411	0.000999	0.014985	36	36.208	0.010989	0.21291	15	25.797	0.032967	0.63177
proline	57	21.971	0.000999	0.058067	-4.4206	0.96803	0.9993	45.316	0.000999	0.014985	34	40.108	0.000999	0.038711	23	22.575	0.24575	0.71246
GM2A	22	33.347	0.000999	0.058067	-17.891	0.999	1	41.141	0.000999	0.014985	18	39.455	0.000999	0.038711	4	12.787	0.18681	0.71246
apoA1	21	28.903	0.000999	0.058067	-13.017	1	1	42.142	0.000999	0.014985	15	40.291	0.000999	0.038711	6	15.134	0.15984	0.71246
GM2	20	22.525	0.001998	0.10323	-12.452	0.995	0.9993	22.169	0.073926	0.41476	14	27.709	0.011988	0.2144	4	5.9417	0.63636	0.96157
asparagine	53	19.736	0.002997	0.12669	-0.77646	0.88012	0.99136	44.234	0.000999	0.014985	31	38.588	0.000999	0.038711	21	25.181	0.11289	0.71246
tyrosine	55	21.388	0.002997	0.12669	4.9867	0.64935	0.99136	49.417	0.000999	0.014985	31	43.308	0.000999	0.038711	21	32.729	0.007992	0.30969
valine	44	19.976	0.003996	0.14293	0.11768	0.84515	0.99136	46.761	0.000999	0.014985	26	39.263	0.001998	0.054651	18	25.923	0.056943	0.71246
serine	71	20.132	0.003996	0.14293	-2.2784	0.95305	0.99573	50.101	0.000999	0.014985	42	41.974	0.001998	0.054651	29	27.88	0.12388	0.71246
glycine	98	17.394	0.005994	0.1467	2.3597	0.88811	0.99136	47.854	0.000999	0.014985	55	40.614	0.011988	0.2144	39	32.885	0.072927	0.71246
isoleucine	45	17.698	0.005994	0.1467	4.3656	0.65435	0.99136	45.477	0.000999	0.014985	25	38.679	0.000999	0.038711	19	27.503	0.036963	0.63659
sulfate	39	18.184	0.005994	0.1467	-3.1549	0.92308	0.99136	33.323	0.007992	0.080789	26	29.386	0.041958	0.54334	12	19.19	0.15684	0.71246
threonine	49	20.205	0.004995	0.1467	1.2036	0.7952	0.99136	50.285	0.000999	0.014985	30	40.392	0.000999	0.038711	19	29.999	0.010989	0.36499
tryptophan	47	19.469	0.004995	0.1467	2.9785	0.7023	0.99136	46.908	0.000999	0.014985	27	39.658	0.000999	0.038711	20	25.829	0.072927	0.71246
acyl-CoA pool	35	20.121	0.005994	0.1467	-10.253	0.99201	0.9993	32.444	0.006993	0.072261	23	31.286	0.012987	0.22367	12	12.095	0.65834	0.96157
sphingosine	26	15.112	0.006993	0.16259	-5.5632	0.95904	0.99735	26.092	0.033966	0.24678	16	25.779	0.023976	0.38444	10	9.4637	0.73826	0.97201
leucine	59	17.386	0.00999	0.22121	3.9349	0.74525	0.99136	44.684	0.000999	0.014985	33	37.707	0.001998	0.054651	24	29.196	0.035964	0.63659
alanine	83	16.952	0.010989	0.23227	1.7427	0.86813	0.99136	39.557	0.016983	0.15485	47	35.775	0.04995	0.54334	32	26.156	0.27273	0.71246
phenylalanine	57	15.433	0.014985	0.30296	5.9413	0.61339	0.99136	46.671	0.000999	0.014985	32	37.573	0.001998	0.054651	24	30.214	0.023976	0.55744
decanoic acid	23	13.128	0.01998	0.38711	-5.3827	0.94805	0.99573	14.255	0.43457	0.75362	13	20.478	0.10689	0.54334	7	7.2407	0.72727	0.97201
galactose	27	13.521	0.023976	0.40046	-2.9506	0.87512	0.99136	24.4	0.060939	0.35869	18	23.12	0.078921	0.54334	8	13.049	0.34266	0.81117
lysine	43	15.28	0.023976	0.40046	5.04	0.60739	0.99136	44.137	0.001998	0.024449	27	33.085	0.007992	0.16158	16	29.377	0.011988	0.37163
6-hydroxymelatonin	29	12.904	0.024975	0.40046	-8.9609	0.99201	0.9993	14.038	0.62837	0.91026	21	15.819	0.64735	0.90942	7	4.2754	0.91309	0.999
FADH2	69	14.198	0.024975	0.40046	-8.8008	0.995	0.9993	24.532	0.48252	0.77103	40	26.084	0.3966	0.73768	27	10.629	0.99401	0.999
UDP-N-acetyl-D-galactosamine	32	14.149	0.022977	0.40046	-7.9737	0.97502	0.9993	19.517	0.26673	0.65809	21	19.966	0.31768	0.67894	11	5.7007	0.96304	0.999
activation-ppara	83	13.834	0.032967	0.46454	-0.75667	0.93606	0.99136	32.528	0.17083	0.57403	48	31.691	0.17283	0.57403	28	25.37	0.22777	0.71246
arginine	49	14.149	0.031968	0.46454	1.15	0.7982	0.99136	41.497	0.000999	0.014985	26	34.252	0.006993	0.14781	23	24.152	0.16583	0.71246
ceramide pool	43	13.726	0.031968	0.46454	-0.89476	0.87413	0.99136	32.987	0.015984	0.14865	23	30.515	0.014985	0.24886	20	15.645	0.6973	0.96157
sphinganine	22	12.473	0.033966	0.46454	-3.3323	0.88112	0.99136	23.686	0.051948	0.33271	13	22.875	0.053946	0.54334	9	9.5402	0.68232	0.96157
6-hydroxymelatonin-sulfate	25	12.107	0.030969	0.46454	-7.8482	0.97902	0.9993	13.823	0.55944	0.84338	17	16.011	0.46653	0.78317	7	4.2754	0.91309	0.999
(10Z)-heptadecenoic acid	32	9.2569	0.13886	0.52028	-2.4548	0.87213	0.99136	17.098	0.42757	0.74745	17	21.224	0.12787	0.54334	10	15.893	0.24076	0.71246
(11Z,14Z)-eicosadienoic acid	32	9.2569	0.13886	0.52028	-2.4548	0.87213	0.99136	17.098	0.42757	0.74745	17	21.224	0.12787	0.54334	10	15.893	0.24076	0.71246
(11Z,14Z,17Z)-eicosatrienoic acid	32	9.2569	0.13886	0.52028	-2.4548	0.87213	0.99136	17.098	0.42757	0.74745	17	21.224	0.12787	0.54334	10	15.893	0.24076	0.71246
(13Z)-eicosenoic acid	32	9.2569	0.13886	0.52028	-2.4548	0.87213	0.99136	17.098	0.42757	0.74745	17	21.224	0.12787	0.54334	10	15.893	0.24076	0.71246
(13Z)-octadecenoic acid	32	9.2569	0.13886	0.52028	-2.4548	0.87213	0.99136	17.098	0.42757	0.74745	17	21.224	0.12787	0.54334	10	15.893	0.24076	0.71246
(13Z,16Z)-docosadienoic acid	32	9.2569	0.13886	0.52028	-2.4548	0.87213	0.99136	17.098	0.42757	0.74745	17	21.224	0.12787	0.54334	10	15.893	0.24076	0.71246
(4Z,7Z,10Z,13Z,16Z)-DPA	32	9.2569	0.13886	0.52028	-2.4548	0.87213	0.99136	17.098	0.42757	0.74745	17	21.224	0.12787	0.54334	10	15.893	0.24076	0.71246
(6Z,9Z)-octadecadienoic acid	32	9.2569	0.13886	0.52028	-2.4548	0.87213	0.99136	17.098	0.42757	0.74745	17	21.224	0.12787	0.54334	10	15.893	0.24076	0.71246
(6Z,9Z,12Z,15Z,18Z)-TPA	32	9.2569	0.13886	0.52028	-2.4548	0.87213	0.99136	17.098	0.42757	0.74745	17	21.224	0.12787	0.54334	10	15.893	0.24076	0.71246
(6Z,9Z,12Z,15Z,18Z,21Z)-THA	32	9.2569	0.13886	0.52028	-2.4548	0.87213	0.99136	17.098	0.42757	0.74745	17	21.224	0.12787	0.54334	10	15.893	0.24076	0.71246
(7Z)-octadecenoic acid	32	9.2569	0.13886	0.52028	-2.4548	0.87213	0.99136	17.098	0.42757	0.74745	17	21.224	0.12787	0.54334	10	15.893	0.24076	0.71246
(7Z)-octadecenoyl-CoA	37	9.2622	0.11489	0.52028	1.8405	0.73826	0.99136	23.607	0.17483	0.57655	20	22.64	0.15984	0.56479	15	15.174	0.55844	0.96157
(7Z)-tetradecenoic acid	32	9.2569	0.13886	0.52028	-2.4548	0.87213	0.99136	17.098	0.42757	0.74745	17	21.224	0.12787	0.54334	10	15.893	0.24076	0.71246
(7Z)-tetradecenoyl-CoA	39	9.5616	0.10689	0.52028	-3.1373	0.92308	0.99136	23.335	0.18581	0.58778	20	23.899	0.10789	0.54334	17	13.405	0.76623	0.97616
(9E)-tetradecenoic acid	33	9.1873	0.11189	0.52028	-2.5078	0.88212	0.99136	16.79	0.48152	0.77103	18	20.562	0.16883	0.56479	10	15.893	0.24076	0.71246
(9Z,12Z,15Z,18Z)-TTA	32	9.2569	0.13886	0.52028	-2.4548	0.87213	0.99136	17.098	0.42757	0.74745	17	21.224	0.12787	0.54334	10	15.893	0.24076	0.71246
(9Z,12Z,15Z,18Z,21Z)-TPA	32	9.2569	0.13886	0.52028	-2.4548	0.87213	0.99136	17.098	0.42757	0.74745	17	21.224	0.12787	0.54334	10	15.893	0.24076	0.71246
10,13,16,19-docosatetraenoic acid	32	9.2569	0.13886	0.52028	-2.4548	0.87213	0.99136	17.098	0.42757	0.74745	17	21.224	0.12787	0.54334	10	15.893	0.24076	0.71246
10,13,16-docosatriynoic acid	32	9.2569	0.13886	0.52028	-2.4548	0.87213	0.99136	17.098	0.42757	0.74745	17	21.224	0.12787	0.54334	10	15.893	0.24076	0.71246
12,15,18,21-tetracosatetraenoic acid	32	9.2569	0.13886	0.52028	-2.4548	0.87213	0.99136	17.098	0.42757	0.74745	17	21.224	0.12787	0.54334	10	15.893	0.24076	0.71246
13,16,19-docosatrienoic acid	32	9.2569	0.13886	0.52028	-2.4548	0.87213	0.99136	17.098	0.42757	0.74745	17	21.224	0.12787	0.54334	10	15.893	0.24076	0.71246
5-tetradecenoyl-CoA	41	10.129	0.092907	0.52028	-3.872	0.93706	0.99136	23.471	0.22178	0.62684	22	23.758	0.12987	0.54334	17	13.405	0.76623	0.97616
7-hexadecenoyl-CoA	41	10.129	0.092907	0.52028	-3.872	0.93706	0.99136	23.471	0.22178	0.62684	22	23.758	0.12987	0.54334	17	13.405	0.76623	0.97616
7-palmitoleic acid	32	9.2569	0.13886	0.52028	-2.4548	0.87213	0.99136	17.098	0.42757	0.74745	17	21.224	0.12787	0.54334	10	15.893	0.24076	0.71246
8,11-eicosadienoic acid	32	9.2569	0.13886	0.52028	-2.4548	0.87213	0.99136	17.098	0.42757	0.74745	17	21.224	0.12787	0.54334	10	15.893	0.24076	0.71246
9-eicosenoic acid	32	9.2569	0.13886	0.52028	-2.4548	0.87213	0.99136	17.098	0.42757	0.74745	17	21.224	0.12787	0.54334	10	15.893	0.24076	0.71246
9-heptadecylenic acid	32	9.2569	0.13886	0.52028	-2.4548	0.87213	0.99136	17.098	0.42757	0.74745	17	21.224	0.12787	0.54334	10	15.893	0.24076	0.71246
ADP	442	18.711	0.042957	0.52028	24.735	0.41558	0.99136	96.87	0.000999	0.014985	228	75.13	0.000999	0.038711	200	71.917	0.004995	0.23227
DHA	32	9.2569	0.13886	0.52028	-2.4548	0.87213	0.99136	17.098	0.42757	0.74745	17	21.224	0.12787	0.54334	10	15.893	0.24076	0.71246
DPA	32	9.2569	0.13886	0.52028	-2.4548	0.87213	0.99136	17.098	0.42757	0.74745	17	21.224	0.12787	0.54334	10	15.893	0.24076	0.71246
EPA	36	10.233	0.085914	0.52028	-3.7204	0.93107	0.99136	18.266	0.46753	0.76985	19	22.725	0.12787	0.54334	12	14.891	0.41958	0.8991
LacCer pool	67	11.421	0.085914	0.52028	0.47833	0.87612	0.99136	26.169	0.34665	0.74745	41	23.988	0.56743	0.86098	22	19.923	0.45455	0.94566
PAPS	57	10.141	0.1049	0.52028	-1.6945	0.93207	0.99136	22.204	0.47952	0.77103	31	23.646	0.31868	0.67894	22	14.672	0.82118	0.99887
PS-LD pool	25	10.572	0.061938	0.52028	7.3716	0.38362	0.99136	31.55	0.004995	0.052788	15	25.048	0.034965	0.52448	9	22.982	0.030969	0.63177
Pi	441	14.143	0.13686	0.52028	24.142	0.48252	0.99136	84.784	0.000999	0.014985	224	67.87	0.028971	0.44905	194	68.457	0.00999	0.35733
UDP-galactose	68	11.221	0.066933	0.52028	3.6392	0.79021	0.99136	31.656	0.11988	0.54494	35	29.949	0.075924	0.54334	30	19.808	0.70629	0.96157
adrenic acid	32	9.2569	0.13886	0.52028	-2.4548	0.87213	0.99136	17.098	0.42757	0.74745	17	21.224	0.12787	0.54334	10	15.893	0.24076	0.71246
behenic acid	35	9.4623	0.1009	0.52028	-3.0092	0.92108	0.99136	17.637	0.46853	0.76985	19	21.352	0.18781	0.60512	11	15.774	0.29071	0.74685
cAMP	46	9.2441	0.13187	0.52028	-0.87499	0.88112	0.99136	24.203	0.22178	0.62684	29	20.117	0.56643	0.86098	16	16.006	0.49251	0.95705
cGMP	46	9.2441	0.13187	0.52028	-0.87499	0.88112	0.99136	24.203	0.22178	0.62684	29	20.117	0.56643	0.86098	16	16.006	0.49251	0.95705
cerotic acid	32	9.2569	0.13886	0.52028	-2.4548	0.87213	0.99136	17.098	0.42757	0.74745	17	21.224	0.12787	0.54334	10	15.893	0.24076	0.71246
cis-cetoleic acid	32	9.2569	0.13886	0.52028	-2.4548	0.87213	0.99136	17.098	0.42757	0.74745	17	21.224	0.12787	0.54334	10	15.893	0.24076	0.71246
cis-erucic acid	33	8.4118	0.13986	0.52028	-1.7322	0.85614	0.99136	17.429	0.44955	0.75362	17	21.224	0.12787	0.54334	11	16.18	0.26174	0.71246
cis-gondoic acid	33	8.4118	0.13986	0.52028	-1.7322	0.85614	0.99136	17.429	0.44955	0.75362	17	21.224	0.12787	0.54334	11	16.18	0.26174	0.71246
cis-vaccenic acid	33	8.4118	0.13986	0.52028	-1.7322	0.85614	0.99136	17.429	0.44955	0.75362	17	21.224	0.12787	0.54334	11	16.18	0.26174	0.71246
eicosanoate	33	9.4325	0.1039	0.52028	-2.753	0.88611	0.99136	17.094	0.46753	0.76985	18	20.974	0.15185	0.56479	10	15.893	0.24076	0.71246
elaidate	32	9.2569	0.13886	0.52028	-2.4548	0.87213	0.99136	17.098	0.42757	0.74745	17	21.224	0.12787	0.54334	10	15.893	0.24076	0.71246
ferricytochrome C	33	8.6791	0.12987	0.52028	-4.1088	0.92807	0.99136	15.715	0.56044	0.84338	18	17.533	0.36064	0.67894	13	8.96	0.89311	0.999
ferrocytochrome C	33	8.6791	0.12987	0.52028	-4.1088	0.92807	0.99136	15.715	0.56044	0.84338	18	17.533	0.36064	0.67894	13	8.96	0.89311	0.999
fructose-6-phosphate	26	8.7158	0.094905	0.52028	-2.0661	0.87213	0.99136	22.031	0.11289	0.52493	17	17.585	0.35065	0.67894	8	16.984	0.13786	0.71246
gamma-linolenate	32	9.2569	0.13886	0.52028	-2.4548	0.87213	0.99136	17.098	0.42757	0.74745	17	21.224	0.12787	0.54334	10	15.893	0.24076	0.71246
glucosylceramide pool	61	9.8268	0.11988	0.52028	2.2606	0.8012	0.99136	27.158	0.24476	0.64419	33	25.261	0.25674	0.67894	25	18.325	0.62238	0.96157
glutamate	108	12.09	0.078921	0.52028	10.947	0.52847	0.99136	50.962	0.000999	0.014985	50	45.839	0.000999	0.038711	52	35.325	0.13586	0.71246
glutamine	65	10.847	0.087912	0.52028	11.127	0.38162	0.99136	49.436	0.000999	0.014985	34	36.553	0.006993	0.14781	31	33.303	0.033966	0.63177
henicosanoic acid	32	9.2569	0.13886	0.52028	-2.4548	0.87213	0.99136	17.098	0.42757	0.74745	17	21.224	0.12787	0.54334	10	15.893	0.24076	0.71246
heptylic acid	20	8.9183	0.11189	0.52028	-3.3829	0.87612	0.99136	9.4424	0.72428	0.97057	11	15.003	0.29471	0.67894	6	6.9803	0.70829	0.96157
hexanoic acid	20	8.9183	0.11189	0.52028	-3.3829	0.87612	0.99136	9.4424	0.72428	0.97057	11	15.003	0.29471	0.67894	6	6.9803	0.70829	0.96157
lignocerate	33	9.4325	0.1039	0.52028	-2.753	0.88611	0.99136	17.094	0.46753	0.76985	18	20.974	0.15185	0.56479	10	15.893	0.24076	0.71246
linolenate	32	9.2569	0.13886	0.52028	-2.4548	0.87213	0.99136	17.098	0.42757	0.74745	17	21.224	0.12787	0.54334	10	15.893	0.24076	0.71246
margaric acid	34	8.4658	0.13287	0.52028	-1.9024	0.87512	0.99136	17.022	0.50849	0.78189	18	20.562	0.16883	0.56479	11	16	0.27273	0.71246
mead acid	32	9.2569	0.13886	0.52028	-2.4548	0.87213	0.99136	17.098	0.42757	0.74745	17	21.224	0.12787	0.54334	10	15.893	0.24076	0.71246
methionine	58	12.946	0.042957	0.52028	7.2423	0.54745	0.99136	44.934	0.000999	0.014985	32	35.033	0.005994	0.13936	26	28.247	0.068931	0.71246
nervonic acid	33	8.4118	0.13986	0.52028	-1.7322	0.85614	0.99136	17.429	0.44955	0.75362	17	21.224	0.12787	0.54334	11	16.18	0.26174	0.71246
nonadecylic acid	32	9.2569	0.13886	0.52028	-2.4548	0.87213	0.99136	17.098	0.42757	0.74745	17	21.224	0.12787	0.54334	10	15.893	0.24076	0.71246
nonanoic acid	20	8.9183	0.11189	0.52028	-3.3829	0.87612	0.99136	9.4424	0.72428	0.97057	11	15.003	0.29471	0.67894	6	6.9803	0.70829	0.96157
octanoic acid	20	8.9183	0.11189	0.52028	-3.3829	0.87612	0.99136	9.4424	0.72428	0.97057	11	15.003	0.29471	0.67894	6	6.9803	0.70829	0.96157
oleate	33	9.1873	0.11189	0.52028	-2.5078	0.88212	0.99136	16.79	0.48152	0.77103	18	20.562	0.16883	0.56479	10	15.893	0.24076	0.71246
omega-3-arachidonic acid	32	9.2569	0.13886	0.52028	-2.4548	0.87213	0.99136	17.098	0.42757	0.74745	17	21.224	0.12787	0.54334	10	15.893	0.24076	0.71246
palmitolate	33	9.1873	0.11189	0.52028	-2.5078	0.88212	0.99136	16.79	0.48152	0.77103	18	20.562	0.16883	0.56479	10	15.893	0.24076	0.71246
palmitoleoyl-CoA	45	9.4826	0.11289	0.52028	-1.4131	0.8971	0.99136	24.624	0.20879	0.62684	24	23.635	0.15085	0.56479	19	15.099	0.7023	0.96157
pentadecanoyl-CoA	34	9.2032	0.11189	0.52028	-2.3626	0.89111	0.99136	21.684	0.21279	0.62684	19	21.4	0.18581	0.60422	13	13.75	0.57642	0.96157
pentadecylic acid	34	8.4658	0.13287	0.52028	-1.9024	0.87512	0.99136	17.022	0.50849	0.78189	18	20.562	0.16883	0.56479	11	16	0.27273	0.71246
phosphatidate-LD-PC pool	25	10.195	0.073926	0.52028	0.69855	0.75624	0.99136	31.49	0.004995	0.052788	16	24.042	0.048951	0.54334	9	20.428	0.062937	0.71246
phosphatidate-LD-PE pool	24	11.606	0.061938	0.52028	-0.48815	0.78721	0.99136	30.962	0.001998	0.024449	16	24.042	0.048951	0.54334	8	19.627	0.058941	0.71246
phosphatidate-LD-PI pool	25	8.5557	0.11489	0.52028	0.8388	0.75125	0.99136	27.539	0.014985	0.1422	16	20.61	0.14486	0.56131	9	18.419	0.10989	0.71246
phosphatidate-LD-PS pool	24	11.606	0.061938	0.52028	-0.48815	0.78721	0.99136	30.962	0.001998	0.024449	16	24.042	0.048951	0.54334	8	19.627	0.058941	0.71246
phosphatidate-LD-TAG pool	30	10.042	0.095904	0.52028	-1.1953	0.84216	0.99136	28.423	0.021978	0.1825	19	22.34	0.13487	0.55011	10	21.033	0.061938	0.71246
physeteric acid	32	9.2569	0.13886	0.52028	-2.4548	0.87213	0.99136	17.098	0.42757	0.74745	17	21.224	0.12787	0.54334	10	15.893	0.24076	0.71246
stearate	34	9.364	0.10889	0.52028	-2.8006	0.9011	0.99136	16.794	0.51948	0.79199	19	20.352	0.23776	0.6698	10	15.893	0.24076	0.71246
stearidonic acid	33	8.4118	0.13986	0.52028	-1.7322	0.85614	0.99136	17.429	0.44955	0.75362	17	21.224	0.12787	0.54334	11	16.18	0.26174	0.71246
tricosanoic acid	32	9.2569	0.13886	0.52028	-2.4548	0.87213	0.99136	17.098	0.42757	0.74745	17	21.224	0.12787	0.54334	10	15.893	0.24076	0.71246
tridecanoyl-CoA	33	8.7681	0.12787	0.52028	-1.8181	0.85814	0.99136	21.481	0.21479	0.62684	18	21.27	0.14386	0.56131	13	13.75	0.57642	0.96157
tridecylic acid	34	8.4658	0.13287	0.52028	-1.9024	0.87512	0.99136	17.022	0.50849	0.78189	18	20.562	0.16883	0.56479	11	16	0.27273	0.71246
undecylic acid	20	8.9183	0.11189	0.52028	-3.3829	0.87612	0.99136	9.4424	0.72428	0.97057	11	15.003	0.29471	0.67894	6	6.9803	0.70829	0.96157
valeric acid	20	8.9183	0.11189	0.52028	-3.3829	0.87612	0.99136	9.4424	0.72428	0.97057	11	15.003	0.29471	0.67894	6	6.9803	0.70829	0.96157
ximenic acid	32	9.2569	0.13886	0.52028	-2.4548	0.87213	0.99136	17.098	0.42757	0.74745	17	21.224	0.12787	0.54334	10	15.893	0.24076	0.71246
(4Z,7Z,10Z,13Z,16Z,19Z)-docosahexaenoyl-CoA	43	10.876	0.075924	0.52028	-4.6657	0.95305	0.99573	24.607	0.18482	0.58778	24	24.54	0.11489	0.54334	17	13.96	0.72128	0.97201
dihomo-gamma-linolenate	36	12.423	0.044955	0.52028	-5.5419	0.95504	0.99573	19.835	0.36963	0.74745	20	24.43	0.088911	0.54334	11	15.319	0.32268	0.78632
3,3-diiodo-L-thyronine-4-O-sulfate	25	10.002	0.078921	0.52028	-5.7433	0.96304	0.99735	14.627	0.50949	0.78189	16	15.755	0.44456	0.77423	8	6.4795	0.82917	0.99887
O2	226	15.266	0.048951	0.52028	2.2907	0.98402	0.9993	45.497	0.41159	0.74745	111	47.002	0.12787	0.54334	100	31.191	0.97502	0.999
linoleate	62	11.317	0.075924	0.52028	-4.5597	0.97502	0.9993	17.43	0.84116	1	33	23.092	0.40859	0.74508	22	13.232	0.8991	0.999
myristic acid	36	8.3074	0.14186	0.52352	-1.8543	0.88012	0.99136	14.929	0.68432	0.93866	18	20.562	0.16883	0.56479	12	14.894	0.41958	0.8991
butyryl-CoA	47	8.8422	0.14386	0.52623	0.014878	0.84915	0.99136	25.412	0.18082	0.5839	29	20.313	0.55045	0.86098	18	15.28	0.63137	0.96157
arachidonate	76	9.6728	0.14486	0.52623	-1.9008	0.94805	0.99573	19.294	0.85115	1	37	24.742	0.41758	0.75262	31	14.976	0.94306	0.999
(13Z)-octadecenoyl-CoA	39	7.9846	0.15984	0.55948	-1.6087	0.88112	0.99136	23.788	0.17283	0.57403	20	23.146	0.14086	0.55508	17	14.908	0.65035	0.96157
(4Z,7Z,10Z,13Z,16Z)-docosapentaenoyl-CoA	44	8.1445	0.16384	0.55948	-0.11236	0.85514	0.99136	25.37	0.17183	0.57403	24	22.593	0.21379	0.62918	18	17.447	0.47552	0.95705
(9E)-octadecenoyl-CoA	39	7.9846	0.15984	0.55948	-1.6087	0.88112	0.99136	23.788	0.17283	0.57403	20	23.146	0.14086	0.55508	17	14.908	0.65035	0.96157
(9E)-tetradecenoyl-CoA	39	7.9846	0.15984	0.55948	-1.6087	0.88112	0.99136	23.788	0.17283	0.57403	20	23.146	0.14086	0.55508	17	14.908	0.65035	0.96157
1,2-diacylglycerol-LD-TAG pool	56	8.4417	0.16384	0.55948	4.3848	0.69231	0.99136	26.695	0.21678	0.62684	29	24.87	0.21179	0.62727	22	22.788	0.23776	0.71246
10,13,16-docosatrienoyl-CoA	40	8.149	0.15784	0.55948	-1.6603	0.89211	0.99136	22.249	0.27772	0.66567	20	23.3	0.13287	0.54675	17	14.829	0.65634	0.96157
phosphatidate-LD-SM pool	20	7.4994	0.16484	0.55948	-0.010585	0.73227	0.99136	24.518	0.025974	0.20471	13	17.989	0.19381	0.60512	7	16.929	0.10989	0.71246
phosphatidate-bile-PC pool	20	7.4994	0.16484	0.55948	-0.010585	0.73227	0.99136	24.518	0.025974	0.20471	13	17.989	0.19381	0.60512	7	16.929	0.10989	0.71246
(2E)-hexadecenoyl-CoA	29	7.7749	0.16284	0.55948	-5.2624	0.96104	0.99735	19.711	0.25075	0.64419	16	18.591	0.24675	0.6698	13	8.8161	0.8981	0.999
oleoyl-CoA	54	8.1034	0.16683	0.56145	5.7014	0.61638	0.99136	32.211	0.034965	0.25013	28	27.228	0.085914	0.54334	24	22.258	0.30869	0.7676
uridine	23	6.9344	0.16783	0.56145	-1.5963	0.85614	0.99136	18.703	0.20879	0.62684	14	15.919	0.33966	0.67894	9	10.045	0.63736	0.96157
(10Z)-heptadecenoyl-CoA	28	5.9939	0.22278	0.56203	1.6116	0.72228	0.99136	19.964	0.24775	0.64419	13	20.328	0.10889	0.54334	13	13.525	0.5954	0.96157
(11Z)-docosenoyl-CoA	39	6.7642	0.20779	0.56203	-0.31494	0.84316	0.99136	21.106	0.3007	0.69791	19	21.862	0.15684	0.56479	17	14.829	0.65634	0.96157
(11Z)-eicosenoyl-CoA	46	5.896	0.28671	0.56203	4.1524	0.67433	0.99136	23.239	0.27073	0.65809	22	22.287	0.19381	0.60512	21	16.957	0.61439	0.96157
(13Z,16Z)-docosadienoyl-CoA	39	6.7642	0.20779	0.56203	-0.31494	0.84316	0.99136	21.106	0.3007	0.69791	19	21.862	0.15684	0.56479	17	14.829	0.65634	0.96157
(1R,2S)-naphthalene 1,2-oxide	28	6.0114	0.22278	0.56203	2.0953	0.6993	0.99136	7.7184	0.92408	1	14	12.801	0.6044	0.87553	10	8.1529	0.82517	0.99887
(1S,2R)-naphthalene 1,2-oxide	28	6.0114	0.22278	0.56203	2.0953	0.6993	0.99136	7.7184	0.92408	1	14	12.801	0.6044	0.87553	10	8.1529	0.82517	0.99887
(5Z,8Z,11Z)-eicosatrienoyl-CoA	40	7.062	0.2048	0.56203	4.5729	0.62937	0.99136	28.171	0.052947	0.33271	20	24.677	0.078921	0.54334	18	19.853	0.28372	0.73293
(5Z,8Z,11Z,14Z,17Z)-eicosapentaenoyl-CoA	51	6.9803	0.23077	0.56203	7.151	0.53746	0.99136	31.2	0.042957	0.29813	27	25.451	0.13087	0.54334	22	22.81	0.23676	0.71246
(6Z,9Z,12Z,15Z)-octadecatetraenoyl-CoA	52	6.9577	0.23077	0.56203	7.0316	0.54146	0.99136	30.811	0.052947	0.33271	28	24.872	0.18282	0.59866	22	22.81	0.23676	0.71246
(6Z,9Z,12Z,15Z,18Z)-tetracosapentaenoyl-CoA	32	7.1059	0.22378	0.56203	0.012221	0.77223	0.99136	18.756	0.31668	0.70123	16	19.357	0.1978	0.60512	14	12.051	0.72927	0.97201
(6Z,9Z,12Z,15Z,18Z,21Z)-tetracosahexaenoyl-CoA	34	6.771	0.20879	0.56203	5.9594	0.53347	0.99136	25.437	0.074925	0.41476	17	22.432	0.087912	0.54334	15	18.655	0.26673	0.71246
(7Z,10Z,13Z,16Z)-docosatetraenoyl-CoA	48	7.3975	0.21678	0.56203	2.3177	0.75425	0.99136	26.062	0.16084	0.57403	26	22.982	0.26174	0.67894	20	17.844	0.52847	0.96157
(7Z,10Z,13Z,16Z,19Z)-docosapentaenoyl-CoA	49	6.2916	0.28472	0.56203	3.4236	0.7013	0.99136	24.774	0.22577	0.62865	25	22.829	0.23876	0.6698	21	18.309	0.51249	0.95705
(8Z,11Z)-eicosadienoyl-CoA	42	6.289	0.24076	0.56203	5.1958	0.6024	0.99136	26.858	0.083916	0.45373	20	24.677	0.078921	0.54334	19	20.264	0.3007	0.75581
(9Z,12Z,15Z,18Z)-tetracosatetraenoyl-CoA	33	6.4953	0.23477	0.56203	0.62287	0.75724	0.99136	17.692	0.43457	0.75362	16	19.357	0.1978	0.60512	14	13.052	0.65934	0.96157
(9Z,12Z,15Z,18Z,21Z)-tetracosapentaenoyl-CoA	36	5.9649	0.25674	0.56203	6.5713	0.48252	0.99136	23.98	0.15185	0.57403	17	22.432	0.087912	0.54334	16	19.006	0.27473	0.71367
1,1-dichloroethylene epoxide	27	5.1205	0.29371	0.56203	3.1605	0.61638	0.99136	6.945	0.92907	1	13	11.966	0.62038	0.88219	10	8.1529	0.82517	0.99887
1-nitronaphthalene-5,6-oxide	28	6.0114	0.22278	0.56203	2.0953	0.6993	0.99136	7.7184	0.92408	1	14	12.801	0.6044	0.87553	10	8.1529	0.82517	0.99887
1-nitronaphthalene-7,8-oxide	27	5.1205	0.29371	0.56203	3.1605	0.61638	0.99136	6.945	0.92907	1	13	11.966	0.62038	0.88219	10	8.1529	0.82517	0.99887
11,12,15-THETA	28	5.2201	0.27073	0.56203	-2.7268	0.88511	0.99136	5.6287	0.96803	1	15	9.0234	0.8971	1	11	3.3937	0.99201	0.999
11,12-EET	55	6.1324	0.28172	0.56203	-2.3952	0.91908	0.99136	17.156	0.78122	1	30	16.982	0.79021	1	22	12.547	0.92108	0.999
11,14,15-THETA	28	5.2201	0.27073	0.56203	-2.7268	0.88511	0.99136	5.6287	0.96803	1	15	9.0234	0.8971	1	11	3.3937	0.99201	0.999
11-HETE	29	5.1021	0.27572	0.56203	-2.6555	0.8961	0.99136	5.275	0.96004	1	15	9.0234	0.8971	1	12	2.8516	0.998	0.999
11-carboxy-alpha-tocotrienol	28	6.2138	0.21778	0.56203	-2.795	0.88711	0.99136	21.586	0.15984	0.57403	17	17.817	0.32867	0.67894	10	15.486	0.26873	0.71246
11-carboxy-gamma-tocotrienol	28	6.2138	0.21778	0.56203	-2.795	0.88711	0.99136	21.586	0.15984	0.57403	17	17.817	0.32867	0.67894	10	15.486	0.26873	0.71246
11h-14,15-EETA	28	5.2201	0.27073	0.56203	-2.7268	0.88511	0.99136	5.6287	0.96803	1	15	9.0234	0.8971	1	11	3.3937	0.99201	0.999
12(13)-EpOME	30	5.9742	0.25574	0.56203	-3.5717	0.91708	0.99136	6.0517	0.96204	1	17	9.2915	0.93407	1	11	3.3937	0.99201	0.999
12,15,18,21-tetracosatetraenoyl-CoA	29	6.3917	0.20879	0.56203	1.3483	0.73726	0.99136	18.038	0.35265	0.74745	14	19.605	0.12987	0.54334	12	13.976	0.50849	0.95705
13,16,19-docosatrienoyl-CoA	39	6.7642	0.20779	0.56203	-0.31494	0.84316	0.99136	21.106	0.3007	0.69791	19	21.862	0.15684	0.56479	17	14.829	0.65634	0.96157
13-HETE	29	5.1021	0.27572	0.56203	-2.6555	0.8961	0.99136	5.275	0.96004	1	15	9.0234	0.8971	1	12	2.8516	0.998	0.999
14,15-EET	55	6.1324	0.28172	0.56203	-2.3952	0.91908	0.99136	17.156	0.78122	1	30	16.982	0.79021	1	22	12.547	0.92108	0.999
15(S)-HPETE	41	5.7563	0.27572	0.56203	-3.3289	0.93307	0.99136	7.0225	0.97303	1	20	12.49	0.84116	1	17	5.3228	0.99201	0.999
15H-11,12-EETA	28	5.2201	0.27073	0.56203	-2.7268	0.88511	0.99136	5.6287	0.96803	1	15	9.0234	0.8971	1	11	3.3937	0.99201	0.999
16(R)-HETE	28	5.2201	0.27073	0.56203	-2.7268	0.88511	0.99136	5.6287	0.96803	1	15	9.0234	0.8971	1	11	3.3937	0.99201	0.999
16alpha-hydroxyestrone	28	5.2201	0.27073	0.56203	-2.7268	0.88511	0.99136	5.6287	0.96803	1	15	9.0234	0.8971	1	11	3.3937	0.99201	0.999
17-HETE	29	5.1021	0.27572	0.56203	-2.6555	0.8961	0.99136	5.275	0.96004	1	15	9.0234	0.8971	1	12	2.8516	0.998	0.999
18-HETE	29	5.1021	0.27572	0.56203	-2.6555	0.8961	0.99136	5.275	0.96004	1	15	9.0234	0.8971	1	12	2.8516	0.998	0.999
18-hydroxy-all-trans-retinoate	28	5.2201	0.27073	0.56203	-2.7268	0.88511	0.99136	5.6287	0.96803	1	15	9.0234	0.8971	1	11	3.3937	0.99201	0.999
19(S)-HETE	28	5.2201	0.27073	0.56203	-2.7268	0.88511	0.99136	5.6287	0.96803	1	15	9.0234	0.8971	1	11	3.3937	0.99201	0.999
19-hydroxyandrostenedione	29	5.1021	0.27572	0.56203	-2.6555	0.8961	0.99136	5.275	0.96004	1	15	9.0234	0.8971	1	12	2.8516	0.998	0.999
19-hydroxytestosterone	29	5.1021	0.27572	0.56203	-2.6555	0.8961	0.99136	5.275	0.96004	1	15	9.0234	0.8971	1	12	2.8516	0.998	0.999
19-oxo-testosterone	29	5.1021	0.27572	0.56203	-2.6555	0.8961	0.99136	5.275	0.96004	1	15	9.0234	0.8971	1	12	2.8516	0.998	0.999
19-oxoandrostenedione	29	5.1021	0.27572	0.56203	-2.6555	0.8961	0.99136	5.275	0.96004	1	15	9.0234	0.8971	1	12	2.8516	0.998	0.999
2,2-dichloroacetaldehyde	27	5.1205	0.29371	0.56203	3.1605	0.61638	0.99136	6.945	0.92907	1	13	11.966	0.62038	0.88219	10	8.1529	0.82517	0.99887
5,6-EET	31	5.8507	0.27073	0.56203	-3.4899	0.8961	0.99136	5.7059	0.96603	1	17	9.2915	0.93407	1	12	2.8516	0.998	0.999
5-carboxy-alpha-chromanol	28	6.2138	0.21778	0.56203	-2.795	0.88711	0.99136	21.586	0.15984	0.57403	17	17.817	0.32867	0.67894	10	15.486	0.26873	0.71246
5-carboxy-gamma-chromanol	28	6.2138	0.21778	0.56203	-2.795	0.88711	0.99136	21.586	0.15984	0.57403	17	17.817	0.32867	0.67894	10	15.486	0.26873	0.71246
6,7-dihydro-LTB4	29	5.1021	0.27572	0.56203	-2.6555	0.8961	0.99136	5.275	0.96004	1	15	9.0234	0.8971	1	12	2.8516	0.998	0.999
7,12-Dimethylbenz[A]Anthracene-3,4-Diol	28	6.3268	0.21279	0.56203	-3.8336	0.91608	0.99136	6.283	0.95504	1	16	9.7233	0.87712	1	10	3.4065	0.98701	0.999
7,12-Dimethylbenz[A]Anthracene-3,4-Diol-1,2-Epoxide	26	5.5654	0.25974	0.56203	-2.9704	0.9021	0.99136	5.8608	0.94306	1	14	9.496	0.82318	1	10	3.4065	0.98701	0.999
7,12-Dimethylbenz[A]Anthracene-3,4-Oxide	28	6.3268	0.21279	0.56203	-3.8336	0.91608	0.99136	6.283	0.95504	1	16	9.7233	0.87712	1	10	3.4065	0.98701	0.999
7,12-dimethylbenz[a]anthracene	28	5.3966	0.25974	0.56203	-2.9034	0.89411	0.99136	5.277	0.97103	1	15	9.0234	0.8971	1	11	2.8327	0.996	0.999
7-HETE	29	5.1021	0.27572	0.56203	-2.6555	0.8961	0.99136	5.275	0.96004	1	15	9.0234	0.8971	1	12	2.8516	0.998	0.999
7-carboxy-alpha-tocotrienol	28	6.2138	0.21778	0.56203	-2.795	0.88711	0.99136	21.586	0.15984	0.57403	17	17.817	0.32867	0.67894	10	15.486	0.26873	0.71246
7-carboxy-gamma-tocotrienol	28	6.2138	0.21778	0.56203	-2.795	0.88711	0.99136	21.586	0.15984	0.57403	17	17.817	0.32867	0.67894	10	15.486	0.26873	0.71246
8,9-EET	31	5.8507	0.27073	0.56203	-3.4899	0.8961	0.99136	5.7059	0.96603	1	17	9.2915	0.93407	1	12	2.8516	0.998	0.999
8-HETE	29	5.1021	0.27572	0.56203	-2.6555	0.8961	0.99136	5.275	0.96004	1	15	9.0234	0.8971	1	12	2.8516	0.998	0.999
9(10)-EpOME	30	5.9742	0.25574	0.56203	-3.5717	0.91708	0.99136	6.0517	0.96204	1	17	9.2915	0.93407	1	11	3.3937	0.99201	0.999
9-HETE	29	5.1021	0.27572	0.56203	-2.6555	0.8961	0.99136	5.275	0.96004	1	15	9.0234	0.8971	1	12	2.8516	0.998	0.999
9-carboxy-alpha-tocotrienol	28	6.2138	0.21778	0.56203	-2.795	0.88711	0.99136	21.586	0.15984	0.57403	17	17.817	0.32867	0.67894	10	15.486	0.26873	0.71246
9-carboxy-gamma-tocotrienol	28	6.2138	0.21778	0.56203	-2.795	0.88711	0.99136	21.586	0.15984	0.57403	17	17.817	0.32867	0.67894	10	15.486	0.26873	0.71246
9-heptadecenoyl-CoA	28	5.9939	0.22278	0.56203	1.6116	0.72228	0.99136	19.964	0.24775	0.64419	13	20.328	0.10889	0.54334	13	13.525	0.5954	0.96157
Benzo[A]Pyrene-2,3-Oxide	28	6.3268	0.21279	0.56203	-3.8336	0.91608	0.99136	6.283	0.95504	1	16	9.7233	0.87712	1	10	3.4065	0.98701	0.999
D-galactosyl-N-acylsphingosine	63	8.2029	0.18981	0.56203	6.0539	0.65734	0.99136	28.117	0.21079	0.62684	35	23.593	0.45954	0.78317	24	23.767	0.2038	0.71246
Dibenzo[A,L]Pyrene	26	5.5654	0.25974	0.56203	-2.9704	0.9021	0.99136	5.8608	0.94306	1	14	9.496	0.82318	1	10	3.4065	0.98701	0.999
Dibenzo[A,L]Pyrene-11,12-Diol	28	6.3268	0.21279	0.56203	-3.8336	0.91608	0.99136	6.283	0.95504	1	16	9.7233	0.87712	1	10	3.4065	0.98701	0.999
Dibenzo[A,L]Pyrene-11,12-Diol-13,14-Epoxide	26	5.5654	0.25974	0.56203	-2.9704	0.9021	0.99136	5.8608	0.94306	1	14	9.496	0.82318	1	10	3.4065	0.98701	0.999
Dibenzo[A,L]Pyrene-11,12-Epoxide	28	6.3268	0.21279	0.56203	-3.8336	0.91608	0.99136	6.283	0.95504	1	16	9.7233	0.87712	1	10	3.4065	0.98701	0.999
FAD	85	9.172	0.18781	0.56203	1.4134	0.86613	0.99136	30.959	0.24775	0.64419	46	27.353	0.43457	0.76605	37	19.125	0.85514	0.999
GSH	80	6.5643	0.27173	0.56203	5.9068	0.72827	0.99136	20.69	0.82018	1	44	19.531	0.88811	1	27	24.901	0.21678	0.71246
PAP	55	7.8487	0.2008	0.56203	2.5914	0.75724	0.99136	22.074	0.45754	0.76257	29	22.066	0.41558	0.75193	22	16.568	0.6993	0.96157
SM pool	24	7.1061	0.19181	0.56203	0.46749	0.74925	0.99136	18.745	0.20579	0.62684	13	17.093	0.23876	0.6698	10	12.146	0.52148	0.96157
Tn-antigen	29	5.4508	0.24875	0.56203	-1.2786	0.85914	0.99136	12.353	0.73626	0.97818	15	11.678	0.74126	0.99333	14	5.6908	0.98501	0.999
UDP-glucuronate	36	6.0902	0.24975	0.56203	-3.1143	0.92008	0.99136	-5.2468	1	1	14	12.226	0.64935	0.90948	10	6.7314	0.91109	0.999
aflatoxin B1-exo-8,9-epoxide	28	6.0114	0.22278	0.56203	2.0953	0.6993	0.99136	7.7184	0.92408	1	14	12.801	0.6044	0.87553	10	8.1529	0.82517	0.99887
benzo[a]pyrene	28	5.3966	0.25974	0.56203	-2.9034	0.89411	0.99136	5.277	0.97103	1	15	9.0234	0.8971	1	11	2.8327	0.996	0.999
benzo[a]pyrene-4,5-oxide	29	5.9105	0.22877	0.56203	2.0324	0.70829	0.99136	7.3256	0.92507	1	15	12.008	0.71728	0.97525	10	8.1529	0.82517	0.99887
benzo[a]pyrene-7,8-diol	28	6.0114	0.22278	0.56203	2.0953	0.6993	0.99136	7.7184	0.92408	1	14	12.801	0.6044	0.87553	10	8.1529	0.82517	0.99887
bromobenzene-2,3-oxide	28	6.0114	0.22278	0.56203	2.0953	0.6993	0.99136	7.7184	0.92408	1	14	12.801	0.6044	0.87553	10	8.1529	0.82517	0.99887
bromobenzene-3,4-oxide	28	6.0114	0.22278	0.56203	2.0953	0.6993	0.99136	7.7184	0.92408	1	14	12.801	0.6044	0.87553	10	8.1529	0.82517	0.99887
butyrate	28	4.9784	0.28771	0.56203	-0.41378	0.80919	0.99136	12.233	0.72927	0.97446	13	15.541	0.34066	0.67894	12	9.6199	0.84016	0.999
chloroacetyl chloride	27	5.1205	0.29371	0.56203	3.1605	0.61638	0.99136	6.945	0.92907	1	13	11.966	0.62038	0.88219	10	8.1529	0.82517	0.99887
choline	23	6.5477	0.18581	0.56203	5.607	0.47652	0.99136	21.613	0.094905	0.49034	14	18.876	0.16084	0.56479	7	18.688	0.062937	0.71246
cis-vaccenoyl-CoA	46	7.0322	0.22378	0.56203	2.9146	0.72428	0.99136	25.708	0.14386	0.57403	23	23.51	0.17483	0.57655	21	17.027	0.61139	0.96157
digalactosylceramide	53	7.4688	0.22178	0.56203	3.7023	0.7023	0.99136	22.922	0.35265	0.74745	30	20.087	0.57243	0.86422	20	18.22	0.49051	0.95705
eicosanoyl-CoA	51	6.9199	0.23277	0.56203	2.5908	0.76623	0.99136	23.382	0.31269	0.69791	26	22.28	0.30569	0.67894	22	16.63	0.6953	0.96157
fatty acid pool	77	7.9742	0.22777	0.56203	6.8768	0.62038	0.99136	25.781	0.50549	0.78189	35	28.511	0.12188	0.54334	34	21.134	0.6953	0.96157
fatty acid-ligands	26	5.0861	0.28671	0.56203	0.54385	0.74625	0.99136	20.159	0.18082	0.5839	15	15.833	0.43656	0.76605	11	12.504	0.55145	0.96157
gamma-linolenoyl-CoA	48	6.8851	0.25275	0.56203	7.6997	0.47852	0.99136	29.866	0.043956	0.30058	25	24.613	0.15185	0.56479	21	21.881	0.26973	0.71246
heptadecanoyl-CoA	42	6.4871	0.23277	0.56203	3.8985	0.67333	0.99136	25.409	0.12088	0.54494	22	22.242	0.1958	0.60512	18	18.093	0.41059	0.8991
hexacosanoyl-CoA	34	6.2255	0.23477	0.56203	0.77685	0.78322	0.99136	17.491	0.47552	0.77103	16	19.357	0.1978	0.60512	15	12.701	0.73427	0.97201
hexacosenoyl-CoA	30	6.0042	0.25574	0.56203	1.499	0.72028	0.99136	17.712	0.37562	0.74745	14	19.475	0.13686	0.5534	13	13.526	0.5954	0.96157
lauroyl-CoA	43	7.8046	0.19181	0.56203	-1.7153	0.9011	0.99136	23.88	0.22378	0.62684	22	23.084	0.15085	0.56479	19	14.851	0.71928	0.97201
myristoyl-CoA	47	5.8482	0.28771	0.56203	3.8721	0.66234	0.99136	27.048	0.12188	0.54494	23	23.87	0.15784	0.56479	22	18.629	0.54545	0.96157
palmitate	46	6.943	0.22877	0.56203	-1.2833	0.89411	0.99136	15.568	0.78422	1	22	20.92	0.28971	0.67894	17	15.748	0.58042	0.96157
palmitoyl-CoA	80	8.392	0.17982	0.56203	2.4936	0.86014	0.99136	32.111	0.16883	0.57403	39	30.053	0.12188	0.54334	36	23.429	0.58941	0.96157
phosphatidylinositol-4,5-bisphosphate	45	6.9283	0.21978	0.56203	5.2864	0.6024	0.99136	34.274	0.003996	0.045321	25	25.308	0.11788	0.54334	19	25.599	0.06993	0.71246
stearoyl-CoA	55	6.7595	0.24875	0.56203	2.3902	0.76723	0.99136	24.445	0.3037	0.69791	28	22.902	0.29171	0.67894	24	17.296	0.69431	0.96157
succinyl-CoA	23	6.4981	0.18781	0.56203	-2.4269	0.89011	0.99136	18.399	0.22378	0.62684	14	16.285	0.31469	0.67894	8	12.557	0.37163	0.85548
sulfite	33	5.4868	0.29271	0.56203	5.2996	0.52448	0.99136	21.696	0.2048	0.62684	19	15.701	0.57842	0.87044	12	20.961	0.1009	0.71246
trichloroethene	27	5.1205	0.29371	0.56203	3.1605	0.61638	0.99136	6.945	0.92907	1	13	11.966	0.62038	0.88219	10	8.1529	0.82517	0.99887
3,3-diiodo-L-thyronine	46	8.0759	0.17782	0.56203	-4.4977	0.95504	0.99573	-3.0681	1	1	24	11.352	0.96104	1	10	6.9869	0.89311	0.999
ubiquinol	76	6.8575	0.29071	0.56203	-4.7106	0.98002	0.9993	23.536	0.61638	0.89849	48	18.101	0.96703	1	28	15.077	0.90609	0.999
ubiquinone	76	6.8575	0.29071	0.56203	-4.7106	0.98002	0.9993	23.536	0.61638	0.89849	48	18.101	0.96703	1	28	15.077	0.90609	0.999
glycerol	28	4.617	0.30569	0.57784	1.4013	0.72827	0.99136	11.457	0.76923	1	17	9.9453	0.9021	1	10	8.8005	0.77922	0.98999
linoleoyl-CoA	57	5.7516	0.3037	0.57784	7.7832	0.50749	0.99136	29.706	0.1039	0.49772	28	25.136	0.16484	0.56479	26	22.729	0.31568	0.78081
nonadecanoyl-CoA	42	5.2914	0.3047	0.57784	5.2125	0.6014	0.99136	22.825	0.24476	0.64419	21	20.973	0.26274	0.67894	18	18.016	0.41459	0.8991
IMP	31	4.9735	0.31069	0.5849	0.18234	0.78122	0.99136	21.056	0.21978	0.62684	18	16.573	0.44156	0.7719	12	15.916	0.32867	0.79188
UDP	222	8.7694	0.31668	0.59326	10.213	0.80519	0.99136	36.758	0.85914	1	104	37.256	0.70829	0.96585	100	31.551	0.97103	0.999
tricosanoyl-CoA	27	4.7217	0.31768	0.59326	3.0169	0.62338	0.99136	18.56	0.29371	0.69562	13	17.874	0.19481	0.60512	12	13.976	0.50849	0.95705
UDP-N-acetylglucosamine	51	5.2227	0.33067	0.61445	7.8163	0.51049	0.99136	29.495	0.066933	0.38905	25	22.973	0.22877	0.66074	25	20.797	0.42657	0.90989
triiodothyronine	31	4.5435	0.33167	0.61445	-3.782	0.9021	0.99136	-16.393	1	1	14	4.2031	0.99201	1	3	4.5807	0.62537	0.96157
TAG-LD pool	35	4.7268	0.33467	0.61754	4.4909	0.58242	0.99136	15.019	0.64635	0.91778	16	17.17	0.33666	0.67894	15	13.687	0.67532	0.96157
(6Z,9Z)-octadecadienoyl-CoA	48	5.1989	0.33766	0.61816	9.3424	0.3956	0.99136	30.287	0.033966	0.24678	24	24.345	0.12488	0.54334	22	22.81	0.23676	0.71246
linolenoyl-CoA	48	5.1989	0.33766	0.61816	9.3424	0.3956	0.99136	30.287	0.033966	0.24678	24	24.345	0.12488	0.54334	22	22.81	0.23676	0.71246
10-HETE	31	4.4661	0.33966	0.61938	-2.0636	0.86414	0.99136	4.1041	0.98002	1	15	9.0234	0.8971	1	13	3.4756	0.997	0.999
2-lysolecithin pool	52	5.0345	0.34466	0.6236	5.5392	0.61838	0.99136	21.283	0.47053	0.77041	26	19.95	0.47652	0.79421	22	18.035	0.58442	0.96157
5-oxo-6-trans-LTB4	31	4.3948	0.34366	0.6236	-2.034	0.86314	0.99136	5.0413	0.97303	1	15	8.7299	0.91409	1	14	2.8535	0.999	0.999
1-acyl-PE pool	50	4.6491	0.35065	0.62411	6.152	0.5954	0.99136	21.501	0.45055	0.75362	24	20.47	0.34765	0.67894	22	18.035	0.58442	0.96157
5-S-glutathionyl-dopamine	21	3.9634	0.34865	0.62411	9.2057	0.27672	0.99136	11.908	0.60639	0.89515	9	15.453	0.22777	0.66074	8	14.513	0.24575	0.71246
CoA	250	9.0011	0.35165	0.62411	13.099	0.72028	0.99136	61.372	0.004995	0.052788	119	50.639	0.040959	0.54334	122	44.53	0.53347	0.96157
L-carnitine	33	4.4882	0.34965	0.62411	6.3651	0.46553	0.99136	24.508	0.1009	0.49772	21	16.401	0.6024	0.87553	12	18.945	0.16783	0.71246
bilirubin	23	3.9207	0.34665	0.62411	-3.3577	0.92008	0.99136	-15.849	1	1	8	5.3547	0.89211	1	3	4.2495	0.65634	0.96157
arachidonyl-CoA	65	5.1966	0.35664	0.63057	7.5802	0.57043	0.99136	28.851	0.19081	0.5995	31	25.251	0.2008	0.60631	30	22.795	0.47353	0.95705
(11Z,14Z)-eicosadienoyl-CoA	46	4.4332	0.37363	0.63285	5.5703	0.58142	0.99136	23.655	0.24875	0.64419	22	21.568	0.24675	0.6698	21	18.309	0.51249	0.95705
(11Z,14Z,17Z)-eicosatrienoyl-CoA	46	4.4332	0.37363	0.63285	5.5703	0.58142	0.99136	23.655	0.24875	0.64419	22	21.568	0.24675	0.6698	21	18.309	0.51249	0.95705
(8Z,11Z,14Z,17Z)-eicosatetraenoyl-CoA	50	4.5221	0.35964	0.63285	9.8637	0.38561	0.99136	29.094	0.085914	0.45398	24	24.345	0.12488	0.54334	23	23.164	0.21479	0.71246
10,13,16,19-docosatetraenoyl-CoA	46	4.4332	0.37363	0.63285	5.5703	0.58142	0.99136	23.655	0.24875	0.64419	22	21.568	0.24675	0.6698	21	18.309	0.51249	0.95705
3-hydroxykynurenine-O-beta-D-glucoside	20	3.827	0.36863	0.63285	6.4272	0.39061	0.99136	5.6833	0.9021	1	8	12.976	0.30769	0.67894	7	11.249	0.4026	0.89147
3-hydroxypropionyl-CoA	30	3.9824	0.36264	0.63285	0.86938	0.75025	0.99136	14.113	0.61938	0.90004	17	11.569	0.82917	1	12	10.915	0.74026	0.97201
9-deoxy-delta12-PGD2	20	3.6519	0.37562	0.63285	6.2767	0.3956	0.99136	7.3055	0.84016	1	8	12.976	0.30769	0.67894	8	10.185	0.55245	0.96157
9-eicosenoyl-CoA	46	4.4332	0.37363	0.63285	5.5703	0.58142	0.99136	23.655	0.24875	0.64419	22	21.568	0.24675	0.6698	21	18.309	0.51249	0.95705
L-dopaquinone	20	3.827	0.36863	0.63285	6.4272	0.39061	0.99136	5.6833	0.9021	1	8	12.976	0.30769	0.67894	7	11.249	0.4026	0.89147
S-(PGA1)-glutathione	20	3.6519	0.37562	0.63285	6.2767	0.3956	0.99136	7.3055	0.84016	1	8	12.976	0.30769	0.67894	8	10.185	0.55245	0.96157
S-(PGA2)-glutathione	20	3.6519	0.37562	0.63285	6.2767	0.3956	0.99136	7.3055	0.84016	1	8	12.976	0.30769	0.67894	8	10.185	0.55245	0.96157
delta-12-prostaglandin J2	20	3.6519	0.37562	0.63285	6.2767	0.3956	0.99136	7.3055	0.84016	1	8	12.976	0.30769	0.67894	8	10.185	0.55245	0.96157
hepoxilin A3-c	20	3.6519	0.37562	0.63285	6.2767	0.3956	0.99136	7.3055	0.84016	1	8	12.976	0.30769	0.67894	8	10.185	0.55245	0.96157
5-S-glutathionyl-L-dopa	22	3.8419	0.37762	0.63391	8.9562	0.28172	0.99136	11.243	0.68731	0.94	9	15.453	0.22777	0.66074	9	13.071	0.40759	0.89825
5-oxo-(6E)-12-epi-LTB4	32	4.3863	0.38961	0.64244	-2.0652	0.85714	0.99136	4.8588	0.98202	1	16	8.3069	0.94206	1	14	2.8535	0.999	0.999
GSSG	22	3.633	0.38961	0.64244	1.8002	0.64336	0.99136	15.316	0.41758	0.74745	11	13.605	0.40859	0.74508	9	14.378	0.32068	0.78632
adrenochrome	20	3.3743	0.38861	0.64244	6.5542	0.38162	0.99136	7.7192	0.82118	1	8	12.976	0.30769	0.67894	8	10.839	0.4965	0.95705
noradrenochrome	20	3.3743	0.38861	0.64244	6.5542	0.38162	0.99136	7.7192	0.82118	1	8	12.976	0.30769	0.67894	8	10.839	0.4965	0.95705
retinyl-ester	28	3.3182	0.38561	0.64244	4.951	0.54346	0.99136	4.6639	0.97602	1	11	12.241	0.52947	0.85112	11	10.051	0.75225	0.97411
(13Z)-eicosenoyl-CoA	45	4.0571	0.3976	0.651	2.0317	0.76623	0.99136	18.625	0.56843	0.84991	20	19.616	0.32268	0.67894	21	15.286	0.74525	0.97201
IDP	26	3.4157	0.3976	0.651	2.856	0.63137	0.99136	13.73	0.56743	0.84991	13	12.611	0.56843	0.86098	11	12.349	0.56444	0.96157
10,11-epoxy-(4Z,7Z)-hexadecadienoic acid	24	2.6511	0.42957	0.66142	0.31733	0.75225	0.99136	19.486	0.17183	0.57403	13	15.172	0.35964	0.67894	10	15.486	0.26873	0.71246
11-carboxy-alpha-chromanol	24	2.6511	0.42957	0.66142	0.31733	0.75225	0.99136	19.486	0.17183	0.57403	13	15.172	0.35964	0.67894	10	15.486	0.26873	0.71246
11-carboxy-gamma-chromanol	24	2.6511	0.42957	0.66142	0.31733	0.75225	0.99136	19.486	0.17183	0.57403	13	15.172	0.35964	0.67894	10	15.486	0.26873	0.71246
12,13-epoxy-(6Z,9Z)-octadecadienoic acid	24	2.6511	0.42957	0.66142	0.31733	0.75225	0.99136	19.486	0.17183	0.57403	13	15.172	0.35964	0.67894	10	15.486	0.26873	0.71246
12-oxo-c-LTB3	23	2.7807	0.42557	0.66142	6.3304	0.43157	0.99136	6.6203	0.89211	1	9	11.66	0.48651	0.80508	10	9.3625	0.74426	0.97201
5,6-epoxy-(8Z)-tetradecenoic acid	24	2.6511	0.42957	0.66142	0.31733	0.75225	0.99136	19.486	0.17183	0.57403	13	15.172	0.35964	0.67894	10	15.486	0.26873	0.71246
7,8-epoxy-(4Z,10Z)-hexadecadienoic acid	24	2.6511	0.42957	0.66142	0.31733	0.75225	0.99136	19.486	0.17183	0.57403	13	15.172	0.35964	0.67894	10	15.486	0.26873	0.71246
7-carboxy-alpha-chromanol	24	2.6511	0.42957	0.66142	0.31733	0.75225	0.99136	19.486	0.17183	0.57403	13	15.172	0.35964	0.67894	10	15.486	0.26873	0.71246
7-carboxy-gamma-chromanol	24	2.6511	0.42957	0.66142	0.31733	0.75225	0.99136	19.486	0.17183	0.57403	13	15.172	0.35964	0.67894	10	15.486	0.26873	0.71246
8,9-epoxy-(5Z)-tetradecenoic acid	24	2.6511	0.42957	0.66142	0.31733	0.75225	0.99136	19.486	0.17183	0.57403	13	15.172	0.35964	0.67894	10	15.486	0.26873	0.71246
9,10-epoxy-(6Z,12Z)-octadecadienoic acid	24	2.6511	0.42957	0.66142	0.31733	0.75225	0.99136	19.486	0.17183	0.57403	13	15.172	0.35964	0.67894	10	15.486	0.26873	0.71246
9-carboxy-alpha-chromanol	24	2.6511	0.42957	0.66142	0.31733	0.75225	0.99136	19.486	0.17183	0.57403	13	15.172	0.35964	0.67894	10	15.486	0.26873	0.71246
9-carboxy-gamma-chromanol	24	2.6511	0.42957	0.66142	0.31733	0.75225	0.99136	19.486	0.17183	0.57403	13	15.172	0.35964	0.67894	10	15.486	0.26873	0.71246
ITP	22	3.002	0.42757	0.66142	3.7027	0.54346	0.99136	14.006	0.5015	0.78189	11	11.3	0.6024	0.87553	10	11.519	0.57642	0.96157
L-dopachrome	22	3.3503	0.40759	0.66142	6.2818	0.42158	0.99136	5.4648	0.92108	1	9	12.007	0.46553	0.78317	8	10.839	0.4965	0.95705
cholesterol	51	3.9254	0.41858	0.66142	5.9896	0.5954	0.99136	26.452	0.14685	0.57403	25	21.263	0.33666	0.67894	24	20.21	0.45155	0.94566
hexanoyl-CoA	27	3.004	0.42757	0.66142	0.43521	0.75225	0.99136	15.273	0.4955	0.78105	14	12.439	0.63137	0.89508	13	9.1029	0.88811	0.999
tetracosanoyl-CoA	45	3.7435	0.41658	0.66142	8.4906	0.42458	0.99136	23.484	0.27173	0.65809	21	20.345	0.2977	0.67894	21	19.407	0.43457	0.91851
1D-myo-inositol-1,4-bisphosphate	20	2.6933	0.43556	0.66844	0.92892	0.6993	0.99136	17.016	0.25774	0.65286	12	11.521	0.6004	0.87553	7	16.779	0.11588	0.71246
acetate	62	4.1135	0.44156	0.67541	0.78308	0.85814	0.99136	22.851	0.51848	0.79199	34	17.1	0.87812	1	26	18.952	0.61638	0.96157
(13Z)-docosenoyl-CoA	43	3.402	0.44755	0.68233	7.0159	0.5005	0.99136	21.479	0.36364	0.74745	19	20.136	0.24775	0.6698	21	16.957	0.61439	0.96157
[protein]-L-serine	28	2.4227	0.45055	0.68243	1.5242	0.72328	0.99136	14.234	0.59041	0.87713	14	11.152	0.72827	0.98444	14	8.978	0.91409	0.999
prostaglandin A1	24	2.3591	0.45055	0.68243	6.7519	0.41159	0.99136	6.2473	0.91908	1	9	12.543	0.42158	0.75398	10	10.76	0.64635	0.96157
heneicosanoyl-CoA	39	2.6498	0.46154	0.6968	8.2826	0.43556	0.99136	21.002	0.30769	0.69791	18	18.702	0.27672	0.67894	18	18.016	0.41459	0.8991
prostaglandin A2	23	2.3591	0.46553	0.6983	6.7519	0.40559	0.99136	8.0935	0.83117	1	9	12.543	0.42158	0.75398	10	10.76	0.64635	0.96157
retinoate	40	2.8977	0.46454	0.6983	-0.77889	0.86114	0.99136	6.13	0.98501	1	19	9.8877	0.93207	1	17	6.9143	0.98601	0.999
decanoyl-CoA	24	2.1511	0.47053	0.70352	0.5763	0.74426	0.99136	15.042	0.44955	0.75362	12	12.077	0.55844	0.86098	12	9.1947	0.86014	0.999
PC-LD pool	63	3.6424	0.47453	0.70723	11.722	0.35265	0.99136	25.946	0.33966	0.74745	30	22.142	0.42358	0.75465	28	23.757	0.32468	0.78632
13,14-dihydro-15-oxo-lipoxin A4	27	1.9058	0.4965	0.70813	3.3198	0.60839	0.99136	10.606	0.78122	1	14	9.2975	0.83117	1	11	11.079	0.67033	0.96157
15-oxo-lipoxin A4	27	1.9058	0.4965	0.70813	3.3198	0.60839	0.99136	10.606	0.78122	1	14	9.2975	0.83117	1	11	11.079	0.67033	0.96157
3-carboxy-alpha-chromanol	44	2.7336	0.4965	0.70813	-0.21692	0.85714	0.99136	1.3811	0.999	1	19	12.935	0.77522	1	13	14.226	0.54446	0.96157
3-oxopropionyl-CoA	26	1.9058	0.4995	0.70813	3.3198	0.5994	0.99136	12.418	0.65734	0.91791	14	9.2975	0.83117	1	11	11.079	0.67033	0.96157
3alpha,7alpha,12alpha,25-tetrahydroxy-5beta-cholestane-24-one	26	1.9058	0.4995	0.70813	3.3198	0.5994	0.99136	12.418	0.65734	0.91791	14	9.2975	0.83117	1	11	11.079	0.67033	0.96157
5beta-cholestane-3alpha,7alpha,12alpha,24s,25-pentol	30	2.3841	0.48152	0.70813	2.4678	0.66533	0.99136	12.2	0.72228	0.97057	17	9.1429	0.93906	1	12	10.777	0.75425	0.97411
9-cis-4-oxo-13,14-dihydro-retinoate	26	1.9058	0.4995	0.70813	3.3198	0.5994	0.99136	12.418	0.65734	0.91791	14	9.2975	0.83117	1	11	11.079	0.67033	0.96157
D-myo-inositol-1,4,5-trisphosphate	24	1.7475	0.4995	0.70813	5.7288	0.46154	0.99136	23.819	0.053946	0.33447	13	15.63	0.33267	0.67894	10	21.677	0.051948	0.71246
K+	35	2.3187	0.49351	0.70813	2.8945	0.67033	0.99136	15.603	0.6034	0.89357	21	11.804	0.8951	1	12	15.772	0.34066	0.81117
N-acetyl-LTE4	58	3.655	0.47952	0.70813	2.9255	0.76424	0.99136	28.194	0.18082	0.5839	26	23.277	0.24675	0.6698	32	16.976	0.8961	0.999
alpha-hydroxyisocaproic acid	26	1.9058	0.4995	0.70813	3.3198	0.5994	0.99136	12.418	0.65734	0.91791	14	9.2975	0.83117	1	11	11.079	0.67033	0.96157
dihomo-gamma-linolenoyl-CoA	43	2.8192	0.48551	0.70813	12.774	0.22078	0.99136	26.907	0.10789	0.50677	20	21.79	0.2028	0.60747	20	23.171	0.18781	0.71246
docosanoyl-CoA	50	2.7342	0.48052	0.70813	10.688	0.34965	0.99136	25.383	0.22078	0.62684	24	20.303	0.36064	0.67894	23	21.821	0.2967	0.75235
gamma-carboxyethyl-hydroxychroman	44	2.7336	0.4965	0.70813	-0.21692	0.85714	0.99136	1.3811	0.999	1	19	12.935	0.77522	1	13	14.226	0.54446	0.96157
hepoxilin A3	36	2.4706	0.48352	0.70813	4.7802	0.59341	0.99136	9.1498	0.92907	1	15	14.166	0.55944	0.86098	15	12.727	0.73327	0.97201
octanoyl-CoA	27	2.1789	0.48052	0.70813	0.39251	0.75325	0.99136	15.272	0.4955	0.78105	14	11.946	0.67433	0.93322	13	9.613	0.86114	0.999
nicotinamide	27	1.6876	0.50549	0.71229	10.843	0.23876	0.99136	27.455	0.021978	0.1825	9	25.556	0.005994	0.13936	16	20.603	0.19481	0.71246
retinol	50	2.3657	0.50549	0.71229	7.5861	0.51149	0.99136	9.7489	0.96703	1	23	13.369	0.85614	1	20	13.928	0.80719	0.99887
cytidine	27	1.6262	0.51049	0.71715	1.948	0.67532	0.99136	19.362	0.24975	0.64419	13	14.932	0.37662	0.70617	14	12.499	0.69131	0.96157
trichloroethanol	37	1.8939	0.51548	0.72199	-1.8939	0.87712	0.99136	-16.383	1	1	17	0.018964	1	1	8	-0.43152	0.999	0.999
lauric acid	51	2.3151	0.51748	0.72261	8.9218	0.45355	0.99136	17.917	0.66434	0.91942	24	18.137	0.56444	0.86098	20	21.593	0.25874	0.71246
(15Z)-tetracosenoyl-CoA	43	2.1987	0.52747	0.72782	10.285	0.33067	0.99136	22.509	0.29271	0.69562	19	19.109	0.32667	0.67894	21	19.407	0.43457	0.91851
4-androstene-3,17-dione	47	2.6847	0.52348	0.72782	3.5285	0.67832	0.99136	13.565	0.87113	1	22	12.433	0.9001	1	23	10.655	0.96903	0.999
bilirubin-bisglucuronoside	22	1.5884	0.52747	0.72782	-1.1078	0.78721	0.99136	-17.61	1	1	7	3.0149	0.95205	1	3	4.5842	0.62537	0.96157
leukotriene E4	62	2.9202	0.52747	0.72782	5.169	0.65035	0.99136	29.143	0.14785	0.57403	28	22.876	0.29271	0.67894	33	20.303	0.73826	0.97201
S-(9-deoxy-delta12-PGD2)-glutathione	21	1.5517	0.53546	0.72804	11.249	0.19081	0.99136	11.273	0.64835	0.91778	8	12.976	0.30769	0.67894	9	15.932	0.2048	0.71246
S-(9-deoxy-delta9,12-PGD2)-glutathione	21	1.5517	0.53546	0.72804	11.249	0.19081	0.99136	11.273	0.64835	0.91778	8	12.976	0.30769	0.67894	9	15.932	0.2048	0.71246
S-(PGJ2)-glutathione	21	1.5517	0.53546	0.72804	11.249	0.19081	0.99136	11.273	0.64835	0.91778	8	12.976	0.30769	0.67894	9	15.932	0.2048	0.71246
estrone	44	2.1599	0.52947	0.72804	2.4122	0.73726	0.99136	9.1847	0.95804	1	19	12.49	0.8032	1	21	8.5805	0.99001	0.999
prostaglandin J2	21	1.5517	0.53546	0.72804	11.249	0.19081	0.99136	11.273	0.64835	0.91778	8	12.976	0.30769	0.67894	9	15.932	0.2048	0.71246
dopamine-O-quinone	27	1.2819	0.53846	0.72998	10.235	0.26474	0.99136	11.214	0.74625	0.98863	11	13.738	0.4006	0.74215	10	19.595	0.1009	0.71246
1-phosphatidyl-1D-myo-inositol-4-phosphate	62	2.6808	0.54845	0.74137	11.474	0.33467	0.99136	32.499	0.05994	0.35733	30	25.488	0.1998	0.60631	28	28.184	0.1009	0.71246
(2E)-octadecenoyl-CoA	28	1.0851	0.55445	0.7473	9.045	0.34765	0.99136	19.347	0.27073	0.65809	15	13.459	0.61638	0.88219	12	16.874	0.26773	0.71246
1,2-diacylglycerol-LD-PE pool	32	1.7492	0.55944	0.7504	6.6948	0.42857	0.99136	17.677	0.38961	0.74745	13	17.112	0.23776	0.6698	16	15.731	0.51049	0.95705
1,2-diacylglycerol-LD-PI pool	42	1.7275	0.56643	0.7504	8.212	0.45854	0.99136	21.294	0.34565	0.74745	19	17.815	0.41558	0.75193	19	21.377	0.23477	0.71246
6,7-dihydro-5-oxo-12-epi-LTB4	38	1.4616	0.56643	0.7504	0.65728	0.7982	0.99136	10.057	0.92208	1	18	10.153	0.88312	1	18	8.3293	0.98202	0.999
6,7-dihydro-5-oxo-LTB4	38	1.4616	0.56643	0.7504	0.65728	0.7982	0.99136	10.057	0.92208	1	18	10.153	0.88312	1	18	8.3293	0.98202	0.999
alpha-CEHC-glucuronide	20	0.91631	0.56643	0.7504	-0.91631	0.77423	0.99136	-19.298	1	1	6	0.68601	0.98501	1	3	1.3404	0.8961	0.999
gamma-CEHC-glucuronide	20	0.91631	0.56643	0.7504	-0.91631	0.77423	0.99136	-19.298	1	1	6	0.68601	0.98501	1	3	1.3404	0.8961	0.999
4-oxo-9-cis-retinoate	45	1.6847	0.57642	0.75931	2.8636	0.71828	0.99136	-3.6266	1	1	20	7.5301	0.98701	1	13	11.236	0.75624	0.97411
dopamine	36	1.2211	0.57542	0.75931	3.3939	0.66633	0.99136	12.959	0.78821	1	18	12.604	0.76124	1	13	18.12	0.26573	0.71246
12,13-hydroxyoctadec-9(z)-enoate	20	0.72598	0.58741	0.76085	-0.72598	0.76823	0.99136	-19.461	1	1	7	-0.18772	0.997	1	2	2.6642	0.69131	0.96157
13-carboxy-alpha-tocotrienol	29	1.0527	0.58342	0.76085	1.6377	0.72428	0.99136	20.426	0.21778	0.62684	14	15.712	0.36064	0.67894	14	15.88	0.43756	0.92066
13-cis-retinoate	21	0.99907	0.58442	0.76085	-0.99907	0.8002	0.99136	-18.717	1	1	8	0.2699	0.996	1	2	2.6642	0.69131	0.96157
9,10-hydroxyoctadec-12(Z)-enoate	20	0.72598	0.58741	0.76085	-0.72598	0.76823	0.99136	-19.461	1	1	7	-0.18772	0.997	1	2	2.6642	0.69131	0.96157
9-cis-retinoate	21	0.99907	0.58442	0.76085	-0.99907	0.8002	0.99136	-18.717	1	1	8	0.2699	0.996	1	2	2.6642	0.69131	0.96157
testosterone	47	1.9027	0.58142	0.76085	4.7713	0.60639	0.99136	5.6291	0.995	1	20	11.307	0.9031	1	19	12.32	0.86913	0.999
1,2-diacylglycerol-LD-SM pool	26	0.84136	0.58941	0.76132	8.6423	0.33067	0.99136	14.82	0.48252	0.77103	10	14.786	0.28272	0.67894	13	14.822	0.5035	0.95705
O-1-alk-1-enyl-2-acyl-sn-glycero-3-phosphoethanolamine	46	1.4379	0.5974	0.76951	10.166	0.36064	0.99136	21.438	0.37762	0.74745	21	17.588	0.5005	0.8166	22	19.067	0.52048	0.96157
GMP	57	1.8228	0.60539	0.77551	8.4451	0.47752	0.99136	29.946	0.098901	0.49772	33	19.112	0.72527	0.98324	23	25.962	0.096903	0.71246
phosphatidylinositol-3,4,5-trisphosphate	47	1.5665	0.6044	0.77551	4.7259	0.61039	0.99136	23.747	0.25874	0.65286	23	18.663	0.48452	0.80464	21	21.369	0.29471	0.75235
PE-LD pool	57	1.696	0.61638	0.78526	12.213	0.28871	0.99136	25.673	0.27073	0.65809	27	19.517	0.52448	0.84681	27	22.524	0.38761	0.87072
estradiol-17beta 3-glucuronide	24	0.16199	0.61638	0.78526	-0.16199	0.77023	0.99136	-19.419	1	1	7	1.3844	0.98501	1	4	3.9645	0.79421	0.99887
Na+	118	2.6003	0.61838	0.78565	10.934	0.56643	0.99136	25.186	0.87612	1	58	21.625	0.95804	1	51	25.595	0.73427	0.97201
1-phosphatidyl-1D-myo-inositol-3,4-bisphosphate	41	0.44852	0.62338	0.78594	7.308	0.48352	0.99136	20.877	0.34865	0.74745	19	17.207	0.46154	0.78317	18	21.57	0.19081	0.71246
2-hydroxyestradiol-17beta	36	0.43577	0.62438	0.78594	4.0514	0.63736	0.99136	10.48	0.89411	1	17	8.9884	0.94206	1	16	12.612	0.76424	0.97616
O2-	23	-0.1147	0.62537	0.78594	6.8886	0.39361	0.99136	11.298	0.64935	0.91778	9	11.507	0.4975	0.81457	12	10.416	0.78821	0.99869
thyroxine	27	0.11282	0.62138	0.78594	-0.11282	0.77323	0.99136	-19.911	1	1	9	0.84751	0.996	1	4	4.4664	0.75624	0.97411
4-hydroxy-all-trans-retinoate	20	-0.10565	0.63337	0.79384	0.10565	0.72727	0.99136	-19.68	1	1	6	-0.45418	0.996	1	3	1.9663	0.84915	0.999
acetyl-CoA	162	3.2955	0.64535	0.80578	11.549	0.63437	0.99136	48.811	0.022977	0.18744	79	36.263	0.33367	0.67894	79	37.329	0.39461	0.88217
malonyl-CoA	20	-0.31716	0.64635	0.80578	14.643	0.097902	0.99136	23.079	0.04995	0.32714	7	18.058	0.061938	0.54334	13	15.375	0.45554	0.94566
thymidine	20	-0.54006	0.65634	0.81604	11.424	0.18082	0.99136	26.859	0.008991	0.088954	9	17.798	0.10589	0.54334	11	20.118	0.095904	0.71246
nicotinate ribonucleotide	21	-0.06454	0.66733	0.82749	4.1721	0.51848	0.99136	17.054	0.27173	0.65809	9	12.407	0.42957	0.76241	11	14.816	0.35864	0.82969
dopaminochrome	26	-0.52968	0.66933	0.82776	12.331	0.17982	0.99136	10.524	0.77123	1	9	13.352	0.35564	0.67894	11	18.953	0.13187	0.71246
deoxyadenosine	20	-0.87993	0.67932	0.83789	8.8429	0.29171	0.99136	22.13	0.074925	0.41476	8	16.224	0.12587	0.54334	12	15.322	0.37363	0.85584
PI pool	84	1.194	0.68432	0.84182	13.145	0.31868	0.99136	35.805	0.057942	0.35451	43	25.34	0.47552	0.79421	36	33.84	0.033966	0.63177
12-keto-LTB4	31	-0.29923	0.68931	0.8435	10.65	0.23676	0.99136	8.6276	0.91309	1	11	12.188	0.53447	0.85112	15	12.564	0.74625	0.97201
succinate	31	-0.3191	0.68931	0.8435	12.613	0.16683	0.99136	23.103	0.12687	0.56187	13	17.66	0.2038	0.60747	16	20.345	0.2048	0.71246
1-organyl-2-lyso-sn-glycero-3-phosphocholine	31	-0.49667	0.69331	0.84516	5.3485	0.4975	0.99136	8.67	0.91209	1	15	7.1194	0.95305	1	14	9.9203	0.85614	0.999
4-methyl-2-oxopentanoate	34	-0.70658	0.69431	0.84516	7.529	0.44456	0.99136	14.682	0.66334	0.91942	17	9.1178	0.94006	1	16	14.057	0.65235	0.96157
1,2-diacylglycerol-LD-PS pool	28	-0.94931	0.7033	0.84944	10.046	0.28472	0.99136	15.879	0.48651	0.77211	10	14.786	0.28272	0.67894	15	15.981	0.49451	0.95705
chloride	40	-0.89966	0.7033	0.84944	7.5234	0.48951	0.99136	19.377	0.44156	0.75362	22	11.28	0.94106	1	16	21.516	0.15784	0.71246
estradiol-17beta	54	-0.034174	0.7003	0.84944	4.0598	0.6983	0.99136	-4.8715	1	1	21	7.0797	0.99201	1	20	8.605	0.98002	0.999
adenosine	30	-0.68264	0.72328	0.8713	10.983	0.21878	0.99136	30	0.00999	0.096778	12	20.895	0.070929	0.54334	18	21.669	0.18482	0.71246
L-lactate	27	-1.8019	0.74326	0.8863	5.0784	0.50649	0.99136	13.838	0.58641	0.87398	10	11.417	0.54645	0.86098	16	11.003	0.84915	0.999
histone-L-lysine	45	-0.87049	0.73826	0.8863	6.2574	0.53447	0.99136	21.516	0.38761	0.74745	19	17.507	0.43556	0.76605	24	17.237	0.6983	0.96157
retinal	24	-1.573	0.74525	0.8863	6.9063	0.40559	0.99136	7.3575	0.88312	1	14	2.69	0.998	1	10	8.2153	0.81818	0.99887
thiol	53	-0.6565	0.74426	0.8863	16.239	0.12687	0.99136	38.27	0.001998	0.024449	24	25.927	0.068931	0.54334	27	32.334	0.015984	0.43721
ubiquitin C terminal thiolester	53	-0.6565	0.74426	0.8863	16.239	0.12687	0.99136	38.27	0.001998	0.024449	24	25.927	0.068931	0.54334	27	32.334	0.015984	0.43721
reverse triiodthyronine	27	-1.9646	0.75225	0.89233	1.9646	0.67333	0.99136	-17.108	1	1	9	0.84751	0.996	1	5	6.8364	0.63237	0.96157
[protein]-N6-methyl-L-lysine	25	-1.4038	0.75425	0.89243	6.7813	0.41359	0.99136	17.814	0.3017	0.69791	11	11.906	0.55145	0.86098	14	13.251	0.64236	0.96157
glucose	65	-0.78106	0.76424	0.90085	13.35	0.26973	0.99136	23.4	0.53646	0.81521	31	16.068	0.87712	1	31	22.239	0.52248	0.96157
propanoyl-CoA	66	-0.88107	0.76523	0.90085	11.716	0.34466	0.99136	31.252	0.1049	0.49772	28	23.007	0.28571	0.67894	35	26.5	0.2977	0.75235
inosine	20	-2.4335	0.77223	0.90678	9.5075	0.26474	0.99136	21.828	0.084915	0.45386	9	13.359	0.35564	0.67894	11	17.35	0.20879	0.71246
1,2-diacylglycerol-LD-PC pool	30	-1.7765	0.78222	0.9139	10.53	0.23477	0.99136	15.827	0.5005	0.78189	11	13.686	0.40559	0.74508	16	16.482	0.46354	0.94945
4-(n-nitrosomethylamino)-1-(3-pyridyl)-1-butanone	24	-1.932	0.78222	0.9139	10.829	0.22877	0.99136	10.451	0.73526	0.97818	13	3.7566	0.99301	1	10	14.504	0.34366	0.81117
N-acetyl-S-[2-carboxy-1-(1H-imidazol-4-yl)ethyl]-L-cysteine	21	-2.1448	0.78721	0.91513	9.3223	0.27273	0.99136	16.201	0.31169	0.69791	8	10.88	0.46553	0.78317	13	12.057	0.70929	0.96157
S-[2-carboxy-1-(1H-imidazol-4-yl)ethyl]-L-cysteine	21	-2.1448	0.78721	0.91513	9.3223	0.27273	0.99136	16.201	0.31169	0.69791	8	10.88	0.46553	0.78317	13	12.057	0.70929	0.96157
UMP	41	-2.5312	0.8022	0.93023	13.602	0.18681	0.99136	28.648	0.048951	0.32517	17	18.562	0.27173	0.67894	23	24.002	0.17183	0.71246
NADPH	264	1.3738	0.80919	0.93368	22.307	0.25674	0.99136	50.588	0.31069	0.69791	118	40.285	0.65734	0.91243	130	45.231	0.58741	0.96157
formate	51	-2.0116	0.80719	0.93368	9.4299	0.41858	0.99136	18.768	0.61339	0.89849	22	13.677	0.83217	1	27	16.608	0.82917	0.99887
1-phosphatidyl-1D-myo-inositol-5-phosphate	44	-2.3343	0.81419	0.93595	7.075	0.48052	0.99136	20.294	0.43756	0.75362	20	15.464	0.64136	0.90648	21	19.658	0.41958	0.8991
dGMP	20	-3.2067	0.81518	0.93595	7.3131	0.34765	0.99136	15.641	0.35165	0.74745	9	9.0893	0.6983	0.96068	11	12.869	0.51049	0.95705
GTP	122	-1.1245	0.82817	0.94852	13.778	0.41459	0.99136	32.49	0.4995	0.78189	54	23.203	0.87213	1	65	26.418	0.91109	0.999
phosphatidylinositol-3,5-bisphosphate	39	-2.86	0.83117	0.94962	5.1276	0.5994	0.99136	15.918	0.64036	0.91778	18	11.902	0.7972	1	18	17.333	0.48252	0.95705
NADP+	275	1.886	0.83417	0.9507	22.192	0.28072	0.99136	52.505	0.26573	0.65809	124	41.351	0.64635	0.90942	135	46.611	0.58342	0.96157
1-radyl-2-acyl-sn-glycero-3-phosphocholine	42	-2.8499	0.83716	0.95179	11.676	0.26873	0.99136	16.569	0.66633	0.91942	18	11.617	0.81119	1	21	18.052	0.53646	0.96157
4-(methylnitrosamino)-1-(3-pyridyl)-1-butanol	27	-3.7145	0.84416	0.95388	14.382	0.13387	0.99136	-7.8538	1	1	10	1.2408	0.996	1	6	18.604	0.058941	0.71246
[protein]-N6,N6-dimethyl-L-lysine	27	-3.7532	0.84515	0.95388	8.9278	0.32268	0.99136	19.498	0.23976	0.64419	11	11.906	0.55145	0.86098	16	15.457	0.53247	0.96157
histone-N6-methyl-L-lysine	27	-3.7532	0.84515	0.95388	8.9278	0.32268	0.99136	19.498	0.23976	0.64419	11	11.906	0.55145	0.86098	16	15.457	0.53247	0.96157
CDP	61	-3.067	0.85914	0.96731	12.093	0.2997	0.99136	21.303	0.61139	0.89849	24	14.402	0.83816	1	36	17.34	0.93207	0.999
dGDP	20	-4.2735	0.86613	0.97049	22.256	0.020979	0.81294	19.953	0.13586	0.57403	8	10.245	0.51049	0.82999	11	20.644	0.07992	0.71246
GDP	117	-1.414	0.86414	0.97049	13.042	0.42857	0.99136	32.491	0.44955	0.75362	53	21.421	0.9031	1	62	26.914	0.86014	0.999
dADP	36	-4.0702	0.87213	0.97485	21.791	0.032967	0.83127	29.423	0.026973	0.20904	15	14.699	0.52048	0.84329	20	28.58	0.027972	0.61938
3,5-diiodo-L-thyronine	23	-4.4479	0.87612	0.97697	4.4479	0.53646	0.99136	-16.681	1	1	7	-1.8819	1	1	5	6.8364	0.63237	0.96157
CMP	55	-3.1909	0.88711	0.9845	16.945	0.11588	0.99136	37.828	0.003996	0.045321	21	24.876	0.0999	0.54334	33	30.421	0.081918	0.71246
inositol-1-phosphate	23	-4.7121	0.88611	0.9845	10.864	0.22078	0.99136	19.81	0.16484	0.57403	10	9.5223	0.6983	0.96068	12	21.103	0.097902	0.71246
pyruvate	51	-4.1715	0.8991	0.99543	11.288	0.31668	0.99136	24.174	0.25774	0.65286	19	16.77	0.49151	0.8076	31	19.352	0.73726	0.97201
DNA	34	-19.171	1	1	45.075	0.000999	0.077423	39.435	0.000999	0.014985	8	11.951	0.37862	0.70706	25	40.87	0.000999	0.058067
PPi	395	-11.678	1	1	52.993	0.000999	0.077423	91.406	0.000999	0.014985	175	51.487	0.53347	0.85112	209	84.794	0.000999	0.058067
dATP	47	-16.077	1	1	45.268	0.000999	0.077423	42.143	0.000999	0.014985	14	14.501	0.45155	0.78056	32	42.934	0.000999	0.058067
dCTP	40	-16.177	1	1	43.696	0.000999	0.077423	39.008	0.000999	0.014985	11	12.822	0.46553	0.78317	28	40.138	0.001998	0.10323
dGTP	44	-16.886	1	1	47.078	0.000999	0.077423	41.216	0.001998	0.024449	13	12.64	0.56643	0.86098	30	43.093	0.000999	0.058067
dTTP	39	-10.269	0.99301	1	32.535	0.000999	0.077423	36.008	0.002997	0.035733	12	16.123	0.28272	0.67894	26	34.757	0.007992	0.30969
AMP	343	-7.2028	0.995	1	42.605	0.004995	0.29033	84.74	0.000999	0.014985	165	49.184	0.56843	0.86098	168	78.674	0.000999	0.058067
THF	24	-12.331	0.998	1	25.945	0.004995	0.29033	24.714	0.03996	0.28154	8	7.9672	0.70829	0.96585	15	27.562	0.017982	0.46454
ubiquitin	230	-3.2426	0.95904	1	33.702	0.011988	0.61938	69.766	0.000999	0.014985	112	43.464	0.35365	0.67894	109	64.363	0.000999	0.058067
dCMP	22	-8.6026	0.98002	1	20.874	0.015984	0.74326	24.063	0.047952	0.32316	8	9.9232	0.53447	0.85112	14	22.664	0.078921	0.71246
fructose	27	-9.5716	0.98202	1	22.382	0.020979	0.81294	18.213	0.31069	0.69791	10	5.0533	0.94505	1	16	21.717	0.15185	0.71246
AKG	62	-9.4853	0.99401	1	23.092	0.031968	0.83127	32.616	0.058941	0.35594	23	16.596	0.65235	0.91094	37	31.835	0.087912	0.71246
HCO3-	52	-6.8887	0.96703	1	22.185	0.026973	0.83127	22.264	0.41059	0.74745	25	10.064	0.98202	1	24	27.528	0.064935	0.71246
RNA	74	-11.85	0.997	1	24.515	0.024975	0.83127	32.606	0.086913	0.4541	25	15.999	0.74625	0.99715	49	28.642	0.47353	0.95705
UTP	94	-5.8637	0.96404	1	24.194	0.031968	0.83127	36.096	0.1019	0.49772	38	21.945	0.65634	0.91243	54	31.449	0.38661	0.87072
[protein]-N-ubiquityllysine	177	-3.3375	0.94206	1	29.532	0.026973	0.83127	58.587	0.000999	0.014985	88	35.494	0.56843	0.86098	82	55.653	0.000999	0.058067
dolichyl-phosphate	21	-10.479	0.995	1	19.032	0.033966	0.83127	21.763	0.071928	0.41292	7	6.6462	0.75125	1	14	21.954	0.091908	0.71246
[protein]-L-lysine	208	-2.3192	0.93906	1	29.227	0.038961	0.88483	63.046	0.000999	0.014985	102	39.813	0.46454	0.78317	99	56.748	0.000999	0.058067
dTMP	23	-6.5163	0.94505	1	19.476	0.03996	0.88483	27.233	0.018981	0.16973	9	12.666	0.40759	0.74508	14	24.749	0.045954	0.71246
dAMP	32	-6.2824	0.94306	1	18.824	0.041958	0.88684	29.287	0.021978	0.1825	13	13.6	0.48851	0.80552	19	26.758	0.050949	0.71246
NADH	256	-7.1835	0.99001	1	30.383	0.047952	0.96947	55.066	0.076923	0.42081	121	32.251	0.98501	1	127	52.529	0.093906	0.71246
(R)-1,2-dimethyl-5,6-dihydroxy-tetrahydroisoquinoline	76	-8.0658	0.98801	1	18.596	0.11489	0.99136	32.266	0.1039	0.49772	33	16.689	0.87413	1	43	28.276	0.35564	0.82687
1-(1-alkenyl)-sn-glycero-3-phosphoethanolamine	27	-5.6015	0.91908	1	13.44	0.15884	0.99136	10.065	0.81419	1	10	4.0702	0.96803	1	15	14.42	0.60939	0.96157
1-phosphatidyl-1D-myo-inositol-3-phosphate	43	-4.6647	0.91508	1	11.529	0.27173	0.99136	20.614	0.41658	0.74745	19	13.478	0.73626	0.98949	20	24.433	0.13287	0.71246
1-phosphatidyl-myo-inositol-3,5-bisphosphate	29	-7.8697	0.97602	1	10.479	0.24675	0.99136	13.251	0.68032	0.93594	10	8.3257	0.78821	1	16	17.414	0.38661	0.87072
2-oxobutyrate	20	-6.1583	0.93007	1	12.018	0.16484	0.99136	18.409	0.18282	0.58628	6	9.9068	0.44855	0.77827	14	15.518	0.45954	0.94945
5,10-methylene-THF	25	-9.0806	0.98002	1	17.594	0.064935	0.99136	25.612	0.02997	0.22846	10	9.4666	0.70729	0.96585	15	25.336	0.042957	0.71246
CO2	124	-4.5369	0.95504	1	22.065	0.1009	0.99136	39.318	0.13187	0.57403	47	29.269	0.32967	0.67894	71	33.992	0.52747	0.96157
CTP	69	-5.1973	0.95405	1	18.589	0.087912	0.99136	27.832	0.27772	0.66567	26	16.583	0.73327	0.98832	42	23.893	0.69131	0.96157
D-lactaldehyde	21	-6.5729	0.94705	1	15.125	0.078921	0.99136	11.003	0.66533	0.91942	11	1.1795	0.998	1	10	14.708	0.32368	0.78632
D-lactate	20	-6.458	0.93806	1	12.3	0.15584	0.99136	16.984	0.25974	0.65286	8	7.0574	0.78222	1	12	16.163	0.30769	0.7676
H2O2	100	-3.0497	0.91109	1	17.588	0.17682	0.99136	35.08	0.16683	0.57403	44	24.485	0.58541	0.87553	49	35.122	0.091908	0.71246
NAD+	294	-5.2405	0.98202	1	31.502	0.060939	0.99136	62.346	0.021978	0.1825	137	38.936	0.91708	1	147	57.353	0.065934	0.71246
NH3	64	-8.2562	0.98302	1	19.89	0.073926	0.99136	28.681	0.20579	0.62684	20	20.47	0.27073	0.67894	39	28.654	0.26673	0.71246
NH4+	49	-4.5996	0.91409	1	11.422	0.3017	0.99136	20.565	0.48452	0.77157	20	12.579	0.83916	1	27	20.039	0.57443	0.96157
SAH	147	-11.255	0.998	1	23.622	0.07992	0.99136	38.657	0.31369	0.69791	62	21.563	0.96603	1	81	36.861	0.46254	0.94945
SAM	150	-11.758	0.998	1	25.079	0.070929	0.99136	39.381	0.29471	0.69562	63	21.654	0.97203	1	83	37.68	0.46553	0.94945
[protein]-N6,N6,N6-trimethyl-L-lysine	32	-5.6651	0.93207	1	10.418	0.25774	0.99136	20.27	0.23876	0.64419	12	11.584	0.59441	0.87553	20	16.667	0.62537	0.96157
acetaldehyde	23	-6.5561	0.94605	1	12.127	0.17982	0.99136	8.3466	0.81818	1	10	1.5371	0.995	1	12	12.522	0.62537	0.96157
beta-carboline	76	-8.0658	0.98801	1	18.596	0.11489	0.99136	32.266	0.1039	0.49772	33	16.689	0.87413	1	43	28.276	0.35564	0.82687
formaldehyde	25	-5.2615	0.90809	1	10.595	0.24675	0.99136	12.754	0.63437	0.91609	13	3.4305	0.99301	1	11	17.973	0.17982	0.71246
harman	76	-8.0658	0.98801	1	18.596	0.11489	0.99136	32.266	0.1039	0.49772	33	16.689	0.87413	1	43	28.276	0.35564	0.82687
peptidylproline-(omega=0)	35	-6.3206	0.93906	1	15.153	0.13487	0.99136	18.272	0.42258	0.74745	15	8.4701	0.91708	1	20	16.837	0.62238	0.96157
peptidylproline-(omega=180)	35	-6.3206	0.93906	1	15.153	0.13487	0.99136	18.272	0.42258	0.74745	15	8.4701	0.91708	1	20	16.837	0.62238	0.96157
salsolinol	79	-9.3202	0.99201	1	19.649	0.1049	0.99136	32.901	0.11489	0.52893	34	16.228	0.91508	1	45	29.486	0.34166	0.81117

## Sheet: U1_DMSO_vs_U937_DMSO
Name	Genes (tot)	Stat (dist.dir.up)	p (dist.dir.up)	p adj (dist.dir.up)	Stat (dist.dir.dn)	p (dist.dir.dn)	p adj (dist.dir.dn)	Stat (non-dir.)	p (non-dir.)	p adj (non-dir.)	Genes (up)	Stat (mix.dir.up)	p (mix.dir.up)	p adj (mix.dir.up)	Genes (down)	Stat (mix.dir.dn)	p (mix.dir.dn)	p adj (mix.dir.dn)
UTP	94	14.29	0.000999	0.092907	-8.9443	0.996	1	32.271	0.022977	0.32259	62	27.922	0.005994	0.1742	32	16.444	0.6983	0.9873
acyl-CoA pool	35	16.334	0.000999	0.092907	-5.0975	0.92008	0.99897	28.981	0.000999	0.066362	25	25.402	0.000999	0.092907	10	14.056	0.17982	0.9272
UDP	222	18.499	0.000999	0.092907	-12.25	1	1	37.648	0.45355	0.93733	154	31.593	0.085914	0.53987	67	21.635	0.90809	1
glutamate	108	20.258	0.000999	0.092907	-14.523	1	1	33.539	0.02997	0.33181	71	32.076	0.002997	0.13936	37	12.868	0.97003	1
aspartate	50	27.22	0.000999	0.092907	-20.34	1	1	33.471	0.000999	0.066362	38	33.934	0.000999	0.092907	12	7.9361	0.78521	1
apoA1	21	13.717	0.002997	0.19909	-8.8536	0.99001	1	20.839	0.014985	0.24886	14	20.531	0.001998	0.13272	7	7.0589	0.6024	0.96529
UDP-N-acetyl-D-galactosamine	32	14.165	0.002997	0.19909	-10.976	0.997	1	18.024	0.13986	0.54196	25	17.552	0.038961	0.3294	7	5.3674	0.78122	1
STAR	27	12.587	0.005994	0.27872	-2.2262	0.77822	0.96583	31.141	0.000999	0.066362	15	28.099	0.000999	0.092907	12	15.296	0.14585	0.9272
sphingosine	26	13.714	0.005994	0.27872	0.07642	0.5994	0.96583	23.618	0.004995	0.14517	18	21.098	0.002997	0.13936	8	10.931	0.3027	0.9272
uridine	23	13.715	0.004995	0.27872	-11.397	0.999	1	17.091	0.1029	0.53146	17	18.189	0.016983	0.23227	5	6.7892	0.4995	0.9328
PPARA	44	12.78	0.007992	0.33784	-8.4096	0.98601	1	26.867	0.004995	0.14517	26	25.352	0.000999	0.092907	18	11.536	0.6993	0.9873
UDP-galactose	68	12.433	0.010989	0.34066	-8.1529	0.98901	1	24.032	0.2048	0.65527	49	19.901	0.083916	0.53453	19	13.505	0.53846	0.94835
GDP	117	12.541	0.00999	0.34066	-6.6911	0.98801	1	33.281	0.072927	0.49869	75	26.649	0.015984	0.22523	42	19.937	0.61139	0.96529
sphinganine	22	13.03	0.010989	0.34066	0.93742	0.53447	0.96583	22.934	0.003996	0.14293	15	20.538	0.003996	0.15485	7	10.592	0.27373	0.9272
GM2A	22	13.288	0.010989	0.34066	-6.8765	0.94705	1	25.239	0.002997	0.13936	13	24.55	0.000999	0.092907	9	9.9554	0.41059	0.9272
CDP	61	12.908	0.011988	0.3484	-9.8242	0.99301	1	24.078	0.13986	0.54196	41	21.909	0.021978	0.24926	20	10.682	0.84216	1
alanine	83	12.826	0.014985	0.40988	-6.7495	0.97203	1	26.626	0.16983	0.60283	57	21.094	0.07992	0.5226	26	16.339	0.48551	0.9272
6-hydroxymelatonin	29	10.733	0.017982	0.46454	-7.9181	0.98202	1	11.543	0.66733	1	20	13.061	0.16484	0.60058	9	1.2506	0.999	1
cysteine	67	11.225	0.018981	0.46454	-1.7698	0.83017	0.96583	30.195	0.007992	0.16158	41	24.129	0.005994	0.1742	26	18.17	0.31069	0.9272
asparagine	53	10.49	0.022977	0.48473	-3.84	0.89411	0.97923	24.616	0.045954	0.40318	34	19.612	0.026973	0.27266	19	14.879	0.3956	0.9272
fructose-6-phosphate	26	10.5	0.023976	0.48473	-3.7235	0.85215	0.96583	17.631	0.11389	0.53146	20	14.6	0.076923	0.51839	6	10.046	0.26673	0.9272
3,3-diiodo-L-thyronine-4-O-sulfate	25	10.586	0.023976	0.48473	-7.7399	0.97802	1	12.103	0.52448	1	18	12.922	0.14486	0.60058	7	2.1508	0.97602	1
IMP	31	10.92	0.023976	0.48473	-6.9359	0.95704	1	19.233	0.1029	0.53146	23	16.735	0.052947	0.3971	8	9.4858	0.43856	0.9272
glutamine	65	10.908	0.025974	0.50325	-4.568	0.92807	0.99897	26.211	0.06993	0.48534	42	20.879	0.026973	0.27266	23	15.848	0.42557	0.9272
tryptophan	47	10.434	0.030969	0.53336	-3.1342	0.85614	0.96583	23.488	0.058941	0.43504	30	18.773	0.03996	0.33181	17	14.115	0.42058	0.9272
RNA	74	10.863	0.028971	0.53336	-7.876	0.98801	1	28.411	0.055944	0.43357	47	23.675	0.013986	0.22523	27	15.799	0.60939	0.96529
proline	57	10.987	0.030969	0.53336	-5.9831	0.94905	1	24.035	0.1019	0.53146	36	20.238	0.035964	0.31553	21	13.1	0.68132	0.9873
deoxyadenosine	20	9.2722	0.034965	0.54196	-3.9201	0.86513	0.96583	21.506	0.010989	0.19653	15	17.046	0.018981	0.23855	5	13.487	0.072927	0.9272
6-hydroxymelatonin-sulfate	25	9.5895	0.034965	0.54196	-6.743	0.96404	1	11.059	0.62138	1	17	12.198	0.16683	0.60058	8	1.7679	0.99101	1
histidine	51	10.548	0.033966	0.54196	-2.8814	0.85614	0.96583	26.664	0.011988	0.20646	30	21.969	0.003996	0.15485	21	15.295	0.44256	0.9272
cytidine	27	9.3623	0.038961	0.56307	-4.6682	0.8971	0.97923	19.752	0.050949	0.43075	17	18.696	0.014985	0.22523	9	11.253	0.3027	0.9272
UDP-N-acetylglucosamine	51	10.017	0.03996	0.56307	-3.351	0.87612	0.96751	24.764	0.054945	0.43304	33	19.547	0.028971	0.28441	18	15.217	0.31768	0.9272
isoleucine	45	10.181	0.037962	0.56307	-2.8406	0.82617	0.96583	24.184	0.044955	0.40318	27	19.958	0.018981	0.23855	18	13.794	0.45654	0.9272
GM2	20	8.6771	0.042957	0.58399	-3.5214	0.84316	0.96583	17.601	0.058941	0.43504	16	12.788	0.13187	0.60058	4	13.781	0.041958	0.9272
UDP-glucuronate	36	8.8895	0.043956	0.58399	-6.9253	0.97502	1	6.6374	0.98701	1	28	7.7364	0.79421	1	7	2.6824	0.95005	1
glucosylceramide pool	61	9.3075	0.050949	0.65809	-6.7056	0.97403	1	20.659	0.4036	0.9024	42	16.802	0.18282	0.60291	19	12.035	0.67832	0.9873
valine	44	9.5483	0.052947	0.66542	-2.2498	0.81319	0.96583	23.798	0.031968	0.34066	26	19.481	0.015984	0.22523	18	13.794	0.45654	0.9272
UMP	41	8.5452	0.062937	0.71892	-5.3843	0.94705	1	20.215	0.14386	0.54385	29	15.097	0.16084	0.60058	12	13.897	0.21978	0.9272
LacCer pool	67	8.6096	0.064935	0.71892	-4.5308	0.94206	1	23.204	0.23377	0.68798	48	16.62	0.26873	0.72651	19	17.158	0.21179	0.9272
succinate	31	8.7046	0.062937	0.71892	-5.6628	0.92807	0.99897	18.952	0.12088	0.53146	20	16.641	0.032967	0.2948	11	9.3764	0.61239	0.96529
glycine	98	10.155	0.063936	0.71892	-0.68592	0.79021	0.96583	33.668	0.015984	0.2563	55	26.375	0.002997	0.13936	43	20.997	0.52148	0.93794
Pi	441	13.629	0.062937	0.71892	2.7403	0.84416	0.96583	61.669	0.00999	0.19356	273	44.589	0.005994	0.1742	166	44.608	0.23776	0.9272
GTP	122	10.255	0.066933	0.72381	-2.9517	0.8961	0.97923	33.615	0.07992	0.50908	77	25.392	0.042957	0.35044	45	22.134	0.43157	0.9272
D-lactate	20	7.2584	0.074925	0.74519	-6.3925	0.96603	1	10.639	0.53846	1	13	10.644	0.20579	0.62441	7	3.478	0.91608	1
histone-L-lysine	45	8.2997	0.076923	0.74519	-6.0582	0.94306	1	18.885	0.2997	0.79182	25	18.135	0.02997	0.28441	20	8.0517	0.96404	1
leucine	59	8.518	0.076923	0.74519	1.4945	0.61439	0.96583	29	0.004995	0.14517	34	21.404	0.011988	0.22523	25	19.589	0.2038	0.9272
CTP	69	8.9658	0.076923	0.74519	-4.4932	0.92408	0.99897	28.562	0.027972	0.32517	42	22.505	0.011988	0.22523	27	17.591	0.42458	0.9272
D-galactosyl-N-acylsphingosine	63	9.0696	0.075924	0.74519	-6.7874	0.96703	1	18.984	0.58641	1	44	15.451	0.32068	0.78897	19	11.057	0.77223	1
CoA	250	10.871	0.080919	0.76791	2.203	0.74126	0.96583	49.886	0.003996	0.14293	149	35.795	0.007992	0.20646	101	35.009	0.25874	0.9272
[protein]-N6-methyl-L-lysine	25	7.6697	0.083916	0.78042	-5.9796	0.94705	1	15.434	0.21978	0.66362	14	15.678	0.020979	0.24388	11	5.5807	0.92008	1
thymidine	20	6.9615	0.085914	0.78333	-1.6093	0.6973	0.96583	22.866	0.005994	0.15485	13	18.085	0.008991	0.20904	7	14.004	0.083916	0.9272
nicotinate ribonucleotide	21	7.3569	0.093906	0.83974	-2.9401	0.81319	0.96583	16.436	0.12687	0.53146	14	13.959	0.074925	0.51236	7	8.7262	0.42358	0.9272
digalactosylceramide	53	7.9039	0.095904	0.84142	-5.4156	0.95205	1	18.241	0.47453	0.9571	37	14.311	0.31369	0.78747	16	11.436	0.64835	0.9873
3,3-diiodo-L-thyronine	46	7.7793	0.097902	0.84305	-5.6576	0.93906	1	5.9467	1	1	35	6.7067	0.95305	1	10	2.8034	0.98901	1
thyroxine	27	2.0494	0.44356	0.88791	-2.0494	0.77223	0.96583	-2.0853	1	1	22	-1.2205	1	1	4	1.5493	0.91209	1
adrenochrome	20	2.0542	0.44655	0.88791	1.0429	0.4975	0.96583	10.259	0.58442	1	12	7.3268	0.44955	0.94163	8	7.2479	0.66833	0.9873
noradrenochrome	20	2.0542	0.44655	0.88791	1.0429	0.4975	0.96583	10.259	0.58442	1	12	7.3268	0.44955	0.94163	8	7.2479	0.66833	0.9873
4-hydroxy-all-trans-retinoate	20	2.0919	0.44056	0.88791	-2.093	0.72827	0.96583	-2.9315	1	1	17	-1.5263	1	1	2	0.98478	0.84116	1
7,12-Dimethylbenz[A]Anthracene-3,4-Diol-1,2-Epoxide	26	2.114	0.45255	0.88791	-1.9323	0.75325	0.96583	3.2261	0.995	1	17	2.5825	0.97203	1	9	1.9339	0.99301	1
Dibenzo[A,L]Pyrene	26	2.114	0.45255	0.88791	-1.9323	0.75325	0.96583	3.2261	0.995	1	17	2.5825	0.97203	1	9	1.9339	0.99301	1
Dibenzo[A,L]Pyrene-11,12-Diol-13,14-Epoxide	26	2.114	0.45255	0.88791	-1.9323	0.75325	0.96583	3.2261	0.995	1	17	2.5825	0.97203	1	9	1.9339	0.99301	1
7,12-dimethylbenz[a]anthracene	28	2.1281	0.45055	0.88791	-1.9498	0.74525	0.96583	1.411	1	1	18	2.3274	0.97902	1	9	1.9339	0.99301	1
benzo[a]pyrene	28	2.1281	0.45055	0.88791	-1.9498	0.74525	0.96583	1.411	1	1	18	2.3274	0.97902	1	9	1.9339	0.99301	1
L-dopaquinone	20	2.1536	0.43257	0.88791	0.94355	0.50849	0.96583	10.169	0.59241	1	13	6.7192	0.56543	1	7	8.0317	0.49351	0.9272
9-deoxy-delta12-PGD2	20	2.1679	0.43057	0.88791	0.92921	0.51049	0.96583	10.217	0.58841	1	13	6.7796	0.56144	1	7	8.0317	0.49351	0.9272
S-(PGA1)-glutathione	20	2.1679	0.43057	0.88791	0.92921	0.51049	0.96583	10.217	0.58841	1	13	6.7796	0.56144	1	7	8.0317	0.49351	0.9272
S-(PGA2)-glutathione	20	2.1679	0.43057	0.88791	0.92921	0.51049	0.96583	10.217	0.58841	1	13	6.7796	0.56144	1	7	8.0317	0.49351	0.9272
delta-12-prostaglandin J2	20	2.1679	0.43057	0.88791	0.92921	0.51049	0.96583	10.217	0.58841	1	13	6.7796	0.56144	1	7	8.0317	0.49351	0.9272
hepoxilin A3-c	20	2.1679	0.43057	0.88791	0.92921	0.51049	0.96583	10.217	0.58841	1	13	6.7796	0.56144	1	7	8.0317	0.49351	0.9272
3-hydroxykynurenine-O-beta-D-glucoside	20	2.173	0.43057	0.88791	0.92411	0.51249	0.96583	10.232	0.58641	1	13	6.7981	0.56044	1	7	8.0317	0.49351	0.9272
L-dopachrome	22	2.2178	0.44156	0.88791	0.73518	0.55145	0.96583	9.6541	0.68332	1	14	6.6232	0.61938	1	8	7.2479	0.66833	0.9873
(2E)-hexadecenoyl-CoA	29	2.3208	0.41758	0.88791	0.10514	0.62438	0.96583	16.599	0.2038	0.65527	17	11.728	0.19481	0.62147	12	11.845	0.39261	0.9272
phosphatidate-LD-PI pool	25	2.3309	0.40559	0.88791	2.9816	0.3956	0.96583	17.289	0.0999	0.53146	16	10.593	0.26474	0.71989	9	14.692	0.11089	0.9272
tridecanoyl-CoA	33	2.3678	0.42657	0.88791	2.0692	0.48751	0.96583	17.568	0.1988	0.65527	18	12.585	0.15684	0.60058	15	12.27	0.50749	0.93644
12-oxo-c-LTB3	23	2.3707	0.41858	0.88791	0.51735	0.54745	0.96583	9.3131	0.72228	1	15	6.4635	0.67932	1	8	6.9405	0.69431	0.9873
pentadecanoyl-CoA	34	2.3904	0.42158	0.88791	1.9808	0.51049	0.96583	17.199	0.23077	0.68349	19	12.105	0.1958	0.62147	15	12.27	0.50749	0.93644
13-carboxy-alpha-tocotrienol	29	2.4195	0.41159	0.88791	0.0064265	0.62937	0.96583	15.751	0.26274	0.73878	17	11.352	0.21878	0.64798	12	10.974	0.49451	0.9272
11,12,15-THETA	28	2.4446	0.41658	0.88791	-2.2695	0.76523	0.96583	3.2556	0.999	1	19	2.6211	0.97602	1	9	1.9339	0.99301	1
11,14,15-THETA	28	2.4446	0.41658	0.88791	-2.2695	0.76523	0.96583	3.2556	0.999	1	19	2.6211	0.97602	1	9	1.9339	0.99301	1
11-HETE	29	2.4446	0.40759	0.88791	-2.2695	0.76024	0.96583	1.6745	1	1	19	2.6211	0.97602	1	9	1.9339	0.99301	1
11h-14,15-EETA	28	2.4446	0.41658	0.88791	-2.2695	0.76523	0.96583	3.2556	0.999	1	19	2.6211	0.97602	1	9	1.9339	0.99301	1
13-HETE	29	2.4446	0.40759	0.88791	-2.2695	0.76024	0.96583	1.6745	1	1	19	2.6211	0.97602	1	9	1.9339	0.99301	1
15H-11,12-EETA	28	2.4446	0.41658	0.88791	-2.2695	0.76523	0.96583	3.2556	0.999	1	19	2.6211	0.97602	1	9	1.9339	0.99301	1
16(R)-HETE	28	2.4446	0.41658	0.88791	-2.2695	0.76523	0.96583	3.2556	0.999	1	19	2.6211	0.97602	1	9	1.9339	0.99301	1
16alpha-hydroxyestrone	28	2.4446	0.41658	0.88791	-2.2695	0.76523	0.96583	3.2556	0.999	1	19	2.6211	0.97602	1	9	1.9339	0.99301	1
17-HETE	29	2.4446	0.40759	0.88791	-2.2695	0.76024	0.96583	1.6745	1	1	19	2.6211	0.97602	1	9	1.9339	0.99301	1
18-HETE	29	2.4446	0.40759	0.88791	-2.2695	0.76024	0.96583	1.6745	1	1	19	2.6211	0.97602	1	9	1.9339	0.99301	1
18-hydroxy-all-trans-retinoate	28	2.4446	0.41658	0.88791	-2.2695	0.76523	0.96583	3.2556	0.999	1	19	2.6211	0.97602	1	9	1.9339	0.99301	1
19(S)-HETE	28	2.4446	0.41658	0.88791	-2.2695	0.76523	0.96583	3.2556	0.999	1	19	2.6211	0.97602	1	9	1.9339	0.99301	1
19-hydroxyandrostenedione	29	2.4446	0.40759	0.88791	-2.2695	0.76024	0.96583	1.6745	1	1	19	2.6211	0.97602	1	9	1.9339	0.99301	1
19-hydroxytestosterone	29	2.4446	0.40759	0.88791	-2.2695	0.76024	0.96583	1.6745	1	1	19	2.6211	0.97602	1	9	1.9339	0.99301	1
19-oxo-testosterone	29	2.4446	0.40759	0.88791	-2.2695	0.76024	0.96583	1.6745	1	1	19	2.6211	0.97602	1	9	1.9339	0.99301	1
19-oxoandrostenedione	29	2.4446	0.40759	0.88791	-2.2695	0.76024	0.96583	1.6745	1	1	19	2.6211	0.97602	1	9	1.9339	0.99301	1
6,7-dihydro-LTB4	29	2.4446	0.40759	0.88791	-2.2695	0.76024	0.96583	1.6745	1	1	19	2.6211	0.97602	1	9	1.9339	0.99301	1
7-HETE	29	2.4446	0.40759	0.88791	-2.2695	0.76024	0.96583	1.6745	1	1	19	2.6211	0.97602	1	9	1.9339	0.99301	1
8-HETE	29	2.4446	0.40759	0.88791	-2.2695	0.76024	0.96583	1.6745	1	1	19	2.6211	0.97602	1	9	1.9339	0.99301	1
9-HETE	29	2.4446	0.40759	0.88791	-2.2695	0.76024	0.96583	1.6745	1	1	19	2.6211	0.97602	1	9	1.9339	0.99301	1
12,15,18,21-tetracosatetraenoyl-CoA	29	2.4476	0.40759	0.88791	2.2855	0.46553	0.96583	13.23	0.48951	0.96435	15	10.247	0.27473	0.73842	14	8.435	0.80819	1
phosphatidate-LD-PE pool	24	2.4519	0.4006	0.88791	2.9701	0.39061	0.96583	16.811	0.13187	0.53146	15	10.562	0.24476	0.69397	9	13.817	0.14386	0.9272
phosphatidate-LD-PS pool	24	2.4519	0.4006	0.88791	2.9701	0.39061	0.96583	16.811	0.13187	0.53146	15	10.562	0.24476	0.69397	9	13.817	0.14386	0.9272
dGDP	20	2.4872	0.39161	0.88791	0.43398	0.55544	0.96583	13.948	0.23776	0.69534	11	10.971	0.14086	0.60058	9	8.6634	0.55145	0.9568
tricosanoyl-CoA	27	2.5087	0.4026	0.88791	2.3966	0.44056	0.96583	14.094	0.38861	0.88581	14	10.81	0.22278	0.65208	13	9.0932	0.72827	0.9873
trichloroethanol	37	2.5198	0.43856	0.88791	-2.3632	0.8032	0.96583	-4.2067	1	1	29	-1.631	1	1	6	-0.15749	0.997	1
5-S-glutathionyl-L-dopa	22	2.597	0.41459	0.88791	3.1412	0.35964	0.96583	14.707	0.21678	0.66319	14	9.6316	0.31968	0.78897	8	11.647	0.24775	0.9272
5-oxo-6-trans-LTB4	31	2.6165	0.43656	0.88791	-2.4474	0.78821	0.96583	1.5735	1	1	20	2.8595	0.98002	1	10	1.3226	0.999	1
5-oxo-(6E)-12-epi-LTB4	32	2.624	0.39261	0.88791	-2.4576	0.80519	0.96583	1.412	0.999	1	21	2.6217	0.98701	1	10	1.3226	0.999	1
10,13,16-docosatrienoyl-CoA	40	2.631	0.43956	0.88791	1.3991	0.53546	0.96583	18.301	0.26873	0.74826	22	13.266	0.17682	0.60058	18	12.615	0.59041	0.96529
lauroyl-CoA	43	2.6365	0.43756	0.88791	1.2504	0.55644	0.96583	20.459	0.16084	0.59256	23	15.089	0.1019	0.59228	20	13.818	0.56743	0.96298
10,11-epoxy-(4Z,7Z)-hexadecadienoic acid	24	2.6553	0.38561	0.88791	0.011316	0.62737	0.96583	16.713	0.13287	0.53146	15	11.674	0.18082	0.60058	9	12.221	0.24276	0.9272
11-carboxy-alpha-chromanol	24	2.6553	0.38561	0.88791	0.011316	0.62737	0.96583	16.713	0.13287	0.53146	15	11.674	0.18082	0.60058	9	12.221	0.24276	0.9272
11-carboxy-gamma-chromanol	24	2.6553	0.38561	0.88791	0.011316	0.62737	0.96583	16.713	0.13287	0.53146	15	11.674	0.18082	0.60058	9	12.221	0.24276	0.9272
12,13-epoxy-(6Z,9Z)-octadecadienoic acid	24	2.6553	0.38561	0.88791	0.011316	0.62737	0.96583	16.713	0.13287	0.53146	15	11.674	0.18082	0.60058	9	12.221	0.24276	0.9272
5,6-epoxy-(8Z)-tetradecenoic acid	24	2.6553	0.38561	0.88791	0.011316	0.62737	0.96583	16.713	0.13287	0.53146	15	11.674	0.18082	0.60058	9	12.221	0.24276	0.9272
7,8-epoxy-(4Z,10Z)-hexadecadienoic acid	24	2.6553	0.38561	0.88791	0.011316	0.62737	0.96583	16.713	0.13287	0.53146	15	11.674	0.18082	0.60058	9	12.221	0.24276	0.9272
7-carboxy-alpha-chromanol	24	2.6553	0.38561	0.88791	0.011316	0.62737	0.96583	16.713	0.13287	0.53146	15	11.674	0.18082	0.60058	9	12.221	0.24276	0.9272
7-carboxy-gamma-chromanol	24	2.6553	0.38561	0.88791	0.011316	0.62737	0.96583	16.713	0.13287	0.53146	15	11.674	0.18082	0.60058	9	12.221	0.24276	0.9272
8,9-epoxy-(5Z)-tetradecenoic acid	24	2.6553	0.38561	0.88791	0.011316	0.62737	0.96583	16.713	0.13287	0.53146	15	11.674	0.18082	0.60058	9	12.221	0.24276	0.9272
9,10-epoxy-(6Z,12Z)-octadecadienoic acid	24	2.6553	0.38561	0.88791	0.011316	0.62737	0.96583	16.713	0.13287	0.53146	15	11.674	0.18082	0.60058	9	12.221	0.24276	0.9272
9-carboxy-alpha-chromanol	24	2.6553	0.38561	0.88791	0.011316	0.62737	0.96583	16.713	0.13287	0.53146	15	11.674	0.18082	0.60058	9	12.221	0.24276	0.9272
9-carboxy-gamma-chromanol	24	2.6553	0.38561	0.88791	0.011316	0.62737	0.96583	16.713	0.13287	0.53146	15	11.674	0.18082	0.60058	9	12.221	0.24276	0.9272
triiodothyronine	31	2.6597	0.42857	0.88791	-2.6597	0.80819	0.96583	-1.4453	1	1	25	-0.54127	0.999	1	5	1.2829	0.96603	1
(11Z)-docosenoyl-CoA	39	2.6867	0.43956	0.88791	1.3947	0.54945	0.96583	18.73	0.21279	0.65527	22	13.266	0.17682	0.60058	17	13.278	0.48651	0.9272
(13Z,16Z)-docosadienoyl-CoA	39	2.6867	0.43956	0.88791	1.3947	0.54945	0.96583	18.73	0.21279	0.65527	22	13.266	0.17682	0.60058	17	13.278	0.48651	0.9272
13,16,19-docosatrienoyl-CoA	39	2.6867	0.43956	0.88791	1.3947	0.54945	0.96583	18.73	0.21279	0.65527	22	13.266	0.17682	0.60058	17	13.278	0.48651	0.9272
bilirubin-bisglucuronoside	22	2.7502	0.4036	0.88791	-2.7502	0.77622	0.96583	-2.1949	1	1	19	-0.79791	1	1	2	0.98478	0.84116	1
dopamine	36	2.7648	0.41059	0.88791	4.9103	0.28771	0.92593	17.877	0.23077	0.68349	22	10.981	0.33467	0.81052	14	14.902	0.22178	0.9272
7,12-Dimethylbenz[A]Anthracene-3,4-Diol	28	2.7851	0.38661	0.88791	-2.61	0.77223	0.96583	3.6803	0.999	1	19	3.1368	0.96404	1	9	1.9339	0.99301	1
7,12-Dimethylbenz[A]Anthracene-3,4-Oxide	28	2.7851	0.38661	0.88791	-2.61	0.77223	0.96583	3.6803	0.999	1	19	3.1368	0.96404	1	9	1.9339	0.99301	1
Benzo[A]Pyrene-2,3-Oxide	28	2.7851	0.38661	0.88791	-2.61	0.77223	0.96583	3.6803	0.999	1	19	3.1368	0.96404	1	9	1.9339	0.99301	1
Dibenzo[A,L]Pyrene-11,12-Diol	28	2.7851	0.38661	0.88791	-2.61	0.77223	0.96583	3.6803	0.999	1	19	3.1368	0.96404	1	9	1.9339	0.99301	1
Dibenzo[A,L]Pyrene-11,12-Epoxide	28	2.7851	0.38661	0.88791	-2.61	0.77223	0.96583	3.6803	0.999	1	19	3.1368	0.96404	1	9	1.9339	0.99301	1
sulfite	33	2.8945	0.37862	0.88791	6.4056	0.22078	0.83974	18.635	0.14386	0.54385	18	11.985	0.1968	0.62147	15	14.511	0.30869	0.9272
hepoxilin A3	36	2.9346	0.3976	0.88791	-0.62616	0.6993	0.96583	8.3818	0.95205	1	23	6.1109	0.87013	1	13	5.8198	0.93007	1
[protein]-N6,N6,N6-trimethyl-L-lysine	32	2.9464	0.36264	0.88791	-1.4526	0.73626	0.96583	18.264	0.13087	0.53146	15	15.853	0.032967	0.2948	17	10.167	0.78521	1
dATP	47	2.958	0.39361	0.88791	1.4104	0.58042	0.96583	25.413	0.028971	0.32857	24	19.19	0.023976	0.25928	23	16.724	0.33766	0.9272
hexanoyl-CoA	27	2.9879	0.36863	0.88791	-2.9879	0.81718	0.96583	12.171	0.5954	1	18	8.587	0.51748	1	9	8.9363	0.52547	0.93794
octanoyl-CoA	27	2.9974	0.36663	0.88791	-2.9974	0.81718	0.96583	13.42	0.44655	0.93322	18	9.3593	0.43257	0.93122	9	10.007	0.4046	0.9272
DNA	34	3.0238	0.36264	0.88791	-2.3686	0.80819	0.96583	20.47	0.076923	0.50379	19	15.408	0.051948	0.396	15	13.478	0.4026	0.9272
12(13)-EpOME	30	3.0844	0.37063	0.88791	-2.9152	0.80519	0.96583	3.6974	0.998	1	21	3.1533	0.97702	1	9	1.9339	0.99301	1
5,6-EET	31	3.0844	0.37662	0.88791	-2.9152	0.82817	0.96583	2.1628	1	1	21	3.1533	0.97702	1	9	1.9339	0.99301	1
8,9-EET	31	3.0844	0.37662	0.88791	-2.9152	0.82817	0.96583	2.1628	1	1	21	3.1533	0.97702	1	9	1.9339	0.99301	1
9(10)-EpOME	30	3.0844	0.37063	0.88791	-2.9152	0.80519	0.96583	3.6974	0.998	1	21	3.1533	0.97702	1	9	1.9339	0.99301	1
succinyl-CoA	23	3.1954	0.34965	0.88791	-2.4813	0.78422	0.96583	14.239	0.27473	0.7559	14	10.77	0.22577	0.65208	9	9.3303	0.48751	0.9272
hexacosenoyl-CoA	30	3.2181	0.36563	0.88791	1.4355	0.53047	0.96583	14.844	0.36164	0.88581	16	11.584	0.2048	0.62441	14	9.3458	0.73227	0.9873
glycerol	28	3.3027	0.34466	0.88791	-0.41682	0.64336	0.96583	7.3579	0.95205	1	22	4.4242	0.94805	1	6	7.4233	0.51149	0.93794
11-carboxy-alpha-tocotrienol	28	3.3098	0.34466	0.88791	-0.84094	0.67632	0.96583	18.447	0.10989	0.53146	18	12.9	0.14585	0.60058	10	13.562	0.20679	0.9272
11-carboxy-gamma-tocotrienol	28	3.3098	0.34466	0.88791	-0.84094	0.67632	0.96583	18.447	0.10989	0.53146	18	12.9	0.14585	0.60058	10	13.562	0.20679	0.9272
5-carboxy-alpha-chromanol	28	3.3098	0.34466	0.88791	-0.84094	0.67632	0.96583	18.447	0.10989	0.53146	18	12.9	0.14585	0.60058	10	13.562	0.20679	0.9272
5-carboxy-gamma-chromanol	28	3.3098	0.34466	0.88791	-0.84094	0.67632	0.96583	18.447	0.10989	0.53146	18	12.9	0.14585	0.60058	10	13.562	0.20679	0.9272
7-carboxy-alpha-tocotrienol	28	3.3098	0.34466	0.88791	-0.84094	0.67632	0.96583	18.447	0.10989	0.53146	18	12.9	0.14585	0.60058	10	13.562	0.20679	0.9272
7-carboxy-gamma-tocotrienol	28	3.3098	0.34466	0.88791	-0.84094	0.67632	0.96583	18.447	0.10989	0.53146	18	12.9	0.14585	0.60058	10	13.562	0.20679	0.9272
9-carboxy-alpha-tocotrienol	28	3.3098	0.34466	0.88791	-0.84094	0.67632	0.96583	18.447	0.10989	0.53146	18	12.9	0.14585	0.60058	10	13.562	0.20679	0.9272
9-carboxy-gamma-tocotrienol	28	3.3098	0.34466	0.88791	-0.84094	0.67632	0.96583	18.447	0.10989	0.53146	18	12.9	0.14585	0.60058	10	13.562	0.20679	0.9272
PAP	55	3.3467	0.3956	0.88791	0.74207	0.63636	0.96583	15.762	0.76723	1	30	12.55	0.38062	0.86562	25	9.6305	0.95904	1
estrone	44	3.4056	0.38761	0.88791	-3.2643	0.86513	0.96583	4.8541	1	1	28	5.0684	0.95504	1	15	3.5086	0.99401	1
dGTP	44	3.4138	0.38761	0.88791	-0.86835	0.73127	0.96583	24.546	0.023976	0.32259	23	19.248	0.013986	0.22523	21	15.387	0.43357	0.9272
AKG	62	3.4287	0.38362	0.88791	-1.7696	0.81718	0.96583	18.718	0.58941	1	35	14.381	0.30569	0.78535	27	11.991	0.90509	1
dCMP	22	3.4443	0.33067	0.88791	6.685	0.16184	0.83152	23.277	0.002997	0.13936	14	15.271	0.02997	0.28441	8	18.398	0.020979	0.75487
13-cis-retinoate	21	3.5504	0.30969	0.88791	-3.5515	0.84116	0.96583	-1.3522	1	1	18	0.14616	0.998	1	2	0.98478	0.84116	1
9-cis-retinoate	21	3.5504	0.30969	0.88791	-3.5515	0.84116	0.96583	-1.3522	1	1	18	0.14616	0.998	1	2	0.98478	0.84116	1
N-acetyl-S-[2-carboxy-1-(1H-imidazol-4-yl)ethyl]-L-cysteine	21	3.5526	0.30969	0.88791	-3.5526	0.84116	0.96583	8.156	0.81119	1	11	8.398	0.34466	0.81768	10	3.0113	0.98701	1
S-[2-carboxy-1-(1H-imidazol-4-yl)ethyl]-L-cysteine	21	3.5526	0.30969	0.88791	-3.5526	0.84116	0.96583	8.156	0.81119	1	11	8.398	0.34466	0.81768	10	3.0113	0.98701	1
L-lactate	27	3.7877	0.3017	0.88791	-3.7877	0.85914	0.96583	6.5364	0.95804	1	18	5.7602	0.7972	1	9	3.1752	0.97003	1
heptylic acid	20	3.9692	0.27672	0.88791	-0.97216	0.65235	0.96583	5.2943	0.95604	1	15	5.1224	0.81319	1	4	6.0237	0.47752	0.9272
hexanoic acid	20	3.9692	0.27672	0.88791	-0.97216	0.65235	0.96583	5.2943	0.95604	1	15	5.1224	0.81319	1	4	6.0237	0.47752	0.9272
nonanoic acid	20	3.9692	0.27672	0.88791	-0.97216	0.65235	0.96583	5.2943	0.95604	1	15	5.1224	0.81319	1	4	6.0237	0.47752	0.9272
octanoic acid	20	3.9692	0.27672	0.88791	-0.97216	0.65235	0.96583	5.2943	0.95604	1	15	5.1224	0.81319	1	4	6.0237	0.47752	0.9272
undecylic acid	20	3.9692	0.27672	0.88791	-0.97216	0.65235	0.96583	5.2943	0.95604	1	15	5.1224	0.81319	1	4	6.0237	0.47752	0.9272
valeric acid	20	3.9692	0.27672	0.88791	-0.97216	0.65235	0.96583	5.2943	0.95604	1	15	5.1224	0.81319	1	4	6.0237	0.47752	0.9272
activation-ppara	83	4.0686	0.38661	0.88791	6.898	0.27772	0.90944	31.546	0.016983	0.26324	50	19.341	0.12288	0.60058	33	26.223	0.04995	0.9272
11,12-EET	55	4.0692	0.33766	0.88791	-2.1653	0.82418	0.96583	12.664	0.93706	1	36	9.9441	0.76224	1	18	10.009	0.82118	1
14,15-EET	55	4.0692	0.33766	0.88791	-2.1653	0.82418	0.96583	12.664	0.93706	1	36	9.9441	0.76224	1	18	10.009	0.82118	1
glucose	65	4.1067	0.34965	0.88791	2.7414	0.51748	0.96583	17.361	0.75524	1	41	12.155	0.6024	1	23	14.668	0.54545	0.95352
3-hydroxypropionyl-CoA	30	4.1118	0.28971	0.88791	-1.7269	0.73327	0.96583	13.742	0.47552	0.9571	20	9.301	0.47153	0.97884	10	10.649	0.46853	0.9272
estradiol-17beta 3-glucuronide	24	4.1299	0.26873	0.88791	-3.8068	0.85015	0.96583	-0.93766	0.999	1	21	0.48516	0.999	1	2	0.98478	0.84116	1
D-lactaldehyde	21	4.1415	0.26873	0.88791	-0.44571	0.65135	0.96583	9.7255	0.66533	1	15	7.2063	0.5964	1	6	6.8005	0.57343	0.96529
retinoate	40	4.1994	0.3047	0.88791	-4.0529	0.9021	0.98238	4.7228	1	1	28	4.4149	0.97403	1	12	1.8787	0.996	1
decanoyl-CoA	24	4.2416	0.26274	0.88791	-4.2416	0.87013	0.96751	13.328	0.38362	0.88581	16	10.254	0.29371	0.7716	8	8.584	0.52647	0.93794
dCTP	40	4.2702	0.2977	0.88791	-1.6005	0.77223	0.96583	23.498	0.047952	0.41292	21	19.01	0.018981	0.23855	19	14.108	0.47552	0.9272
adenosine	30	4.3115	0.27572	0.88791	5.7164	0.22977	0.83974	27.8	0.000999	0.066362	18	19.343	0.006993	0.19128	12	20.266	0.021978	0.75487
[protein]-L-serine	28	4.3399	0.25674	0.88791	-2.8195	0.78621	0.96583	14.649	0.35664	0.88581	18	11.327	0.25075	0.69404	10	9.3161	0.58741	0.96529
Tn-antigen	29	4.4172	0.26573	0.88791	-2.9232	0.81219	0.96583	12.281	0.5984	1	19	9.5288	0.42657	0.93122	10	7.7788	0.74226	0.9873
bilirubin	23	4.42	0.25275	0.88791	-4.2854	0.86613	0.96583	-0.28322	1	1	19	1.2442	0.99201	1	3	0.8245	0.91608	1
butyrate	28	4.4352	0.25175	0.88791	-1.921	0.74525	0.96583	5.8706	0.97902	1	20	5.93	0.80719	1	7	4.8205	0.83117	1
phosphatidate-LD-PC pool	25	4.4373	0.23676	0.88791	1.2682	0.52248	0.96583	18.493	0.057942	0.43504	16	12.754	0.13287	0.60058	9	13.817	0.14386	0.9272
1,1-dichloroethylene epoxide	27	4.5058	0.25075	0.88791	-1.6078	0.74625	0.96583	8.6862	0.87712	1	18	8.1909	0.55245	1	8	6.5738	0.73526	0.9873
1-nitronaphthalene-7,8-oxide	27	4.5058	0.25075	0.88791	-1.6078	0.74625	0.96583	8.6862	0.87712	1	18	8.1909	0.55245	1	8	6.5738	0.73526	0.9873
2,2-dichloroacetaldehyde	27	4.5058	0.25075	0.88791	-1.6078	0.74625	0.96583	8.6862	0.87712	1	18	8.1909	0.55245	1	8	6.5738	0.73526	0.9873
chloroacetyl chloride	27	4.5058	0.25075	0.88791	-1.6078	0.74625	0.96583	8.6862	0.87712	1	18	8.1909	0.55245	1	8	6.5738	0.73526	0.9873
trichloroethene	27	4.5058	0.25075	0.88791	-1.6078	0.74625	0.96583	8.6862	0.87712	1	18	8.1909	0.55245	1	8	6.5738	0.73526	0.9873
galactose	27	4.6124	0.24276	0.88791	4.8531	0.31269	0.95032	19.296	0.062937	0.45024	19	13.006	0.14985	0.60058	8	15.405	0.065934	0.9272
GMP	57	4.7698	0.2997	0.88791	2.8935	0.48252	0.96583	24.948	0.065934	0.46454	37	17.112	0.12787	0.60058	20	18.842	0.14585	0.9272
L-carnitine	33	4.9796	0.21479	0.88791	-1.6732	0.77822	0.96583	15.714	0.34366	0.87323	20	12.574	0.19481	0.62147	13	9.44	0.70729	0.9873
arginine	49	4.9963	0.25275	0.88791	2.1546	0.52747	0.96583	27.006	0.005994	0.15485	24	20.84	0.008991	0.20904	25	17.39	0.35664	0.9272
methionine	58	5.0397	0.28372	0.88791	3.0325	0.45355	0.96583	22.094	0.21978	0.66362	32	16.066	0.12987	0.60058	26	15.176	0.6024	0.96529
butyryl-CoA	47	5.0697	0.23976	0.88791	-3.2575	0.86214	0.96583	18.982	0.31868	0.82326	32	13.339	0.33966	0.81768	15	14.118	0.33666	0.9272
(1R,2S)-naphthalene 1,2-oxide	28	5.0724	0.20979	0.88791	-2.2285	0.76024	0.96583	9.1318	0.86613	1	19	8.7034	0.51149	1	8	6.5738	0.73526	0.9873
(1S,2R)-naphthalene 1,2-oxide	28	5.0724	0.20979	0.88791	-2.2285	0.76024	0.96583	9.1318	0.86613	1	19	8.7034	0.51149	1	8	6.5738	0.73526	0.9873
1-nitronaphthalene-5,6-oxide	28	5.0724	0.20979	0.88791	-2.2285	0.76024	0.96583	9.1318	0.86613	1	19	8.7034	0.51149	1	8	6.5738	0.73526	0.9873
aflatoxin B1-exo-8,9-epoxide	28	5.0724	0.20979	0.88791	-2.2285	0.76024	0.96583	9.1318	0.86613	1	19	8.7034	0.51149	1	8	6.5738	0.73526	0.9873
benzo[a]pyrene-7,8-diol	28	5.0724	0.20979	0.88791	-2.2285	0.76024	0.96583	9.1318	0.86613	1	19	8.7034	0.51149	1	8	6.5738	0.73526	0.9873
bromobenzene-2,3-oxide	28	5.0724	0.20979	0.88791	-2.2285	0.76024	0.96583	9.1318	0.86613	1	19	8.7034	0.51149	1	8	6.5738	0.73526	0.9873
bromobenzene-3,4-oxide	28	5.0724	0.20979	0.88791	-2.2285	0.76024	0.96583	9.1318	0.86613	1	19	8.7034	0.51149	1	8	6.5738	0.73526	0.9873
GSH	80	5.0815	0.29471	0.88791	0.40969	0.6993	0.96583	21.46	0.57542	1	51	13.808	0.62438	1	29	17.332	0.50549	0.93644
benzo[a]pyrene-4,5-oxide	29	5.09	0.22677	0.88791	-2.2973	0.76124	0.96583	8.943	0.88811	1	20	8.4469	0.56244	1	8	6.5738	0.73526	0.9873
(7Z)-octadecenoyl-CoA	37	5.1515	0.21878	0.88791	-3.1089	0.84815	0.96583	15.387	0.47552	0.9571	22	12.747	0.21479	0.64436	15	8.7291	0.83816	1
threonine	49	5.2247	0.23876	0.88791	5.4239	0.29371	0.92593	28.52	0.003996	0.14293	27	20.157	0.015984	0.22523	22	20.234	0.098901	0.9272
decanoic acid	23	5.2584	0.1988	0.88791	-2.4732	0.78322	0.96583	6.6596	0.92408	1	17	6.7313	0.69031	1	5	5.5427	0.63736	0.9873
cAMP	46	5.3364	0.21079	0.88791	1.0753	0.57842	0.96583	22.194	0.08991	0.53146	28	16.784	0.060939	0.42934	18	14.545	0.38761	0.9272
cGMP	46	5.3364	0.21079	0.88791	1.0753	0.57842	0.96583	22.194	0.08991	0.53146	28	16.784	0.060939	0.42934	18	14.545	0.38761	0.9272
dGMP	20	5.338	0.16583	0.88791	-0.81221	0.64036	0.96583	16.355	0.10989	0.53146	14	12.141	0.14286	0.60058	6	11.315	0.19081	0.9272
fatty acid-ligands	26	5.381	0.1968	0.88791	-4.0664	0.87213	0.96751	16.971	0.14386	0.54385	15	14.528	0.060939	0.42934	11	9.1262	0.63437	0.9873
dTMP	23	5.4251	0.18881	0.88791	-1.2048	0.6983	0.96583	14.664	0.24476	0.70254	15	11.875	0.16484	0.60058	8	8.6027	0.52647	0.93794
dTTP	39	5.7577	0.19381	0.88791	-3.054	0.82817	0.96583	23.202	0.038961	0.36973	23	18.384	0.025974	0.27266	16	14.183	0.36963	0.9272
IDP	26	5.8603	0.16783	0.88791	-3.2983	0.83716	0.96583	11.084	0.65335	1	18	9.4567	0.42258	0.93122	8	5.7968	0.8032	1
lysine	43	5.9411	0.17183	0.88791	1.6925	0.52847	0.96583	24.882	0.022977	0.32259	21	19.845	0.013986	0.22523	22	15.398	0.43357	0.9272
salsolinol	79	5.9413	0.23477	0.88791	-2.1146	0.84016	0.96583	24.421	0.27373	0.7559	47	18.401	0.15684	0.60058	32	16.07	0.74126	0.9873
[protein]-N6,N6-dimethyl-L-lysine	27	5.966	0.15684	0.88791	-4.3397	0.87912	0.96751	16.196	0.20879	0.65527	14	15.678	0.020979	0.24388	13	7.0712	0.87512	1
histone-N6-methyl-L-lysine	27	5.966	0.15684	0.88791	-4.3397	0.87912	0.96751	16.196	0.20879	0.65527	14	15.678	0.020979	0.24388	13	7.0712	0.87512	1
leukotriene E4	62	6.3328	0.17383	0.88791	-0.60015	0.75824	0.96583	24.821	0.11888	0.53146	35	18.84	0.055944	0.41292	27	16.162	0.56444	0.9614
FADH2	69	6.3999	0.20779	0.88791	-6.0953	0.96304	1	15.645	0.92607	1	48	12.376	0.72028	1	20	11.723	0.76224	1
inosine	20	6.4708	0.10889	0.88791	-1.1187	0.66134	0.96583	22.134	0.006993	0.15485	13	17.201	0.012987	0.22523	7	13.972	0.084915	0.9272
(R)-1,2-dimethyl-5,6-dihydroxy-tetrahydroisoquinoline	76	6.4777	0.17982	0.88791	-2.5762	0.85514	0.96583	23.911	0.29271	0.77777	46	18.179	0.15085	0.60058	30	15.547	0.7003	0.9873
beta-carboline	76	6.4777	0.17982	0.88791	-2.5762	0.85514	0.96583	23.911	0.29271	0.77777	46	18.179	0.15085	0.60058	30	15.547	0.7003	0.9873
harman	76	6.4777	0.17982	0.88791	-2.5762	0.85514	0.96583	23.911	0.29271	0.77777	46	18.179	0.15085	0.60058	30	15.547	0.7003	0.9873
acetyl-CoA	162	6.5983	0.26773	0.88791	2.8315	0.65035	0.96583	39.886	0.024975	0.32259	91	28.266	0.014985	0.22523	71	28.248	0.36563	0.9272
ITP	22	6.755	0.12687	0.88791	-3.9697	0.85215	0.96583	9.766	0.67333	1	16	8.9751	0.41359	0.9246	6	4.0442	0.84416	1
phenylalanine	57	6.8713	0.17083	0.88791	1.2715	0.59341	0.96583	25.331	0.054945	0.43304	32	19.456	0.022977	0.25439	25	16.237	0.46653	0.9272
serine	71	7.0463	0.17183	0.88791	1.8517	0.57642	0.96583	29.4	0.034965	0.35345	40	22.223	0.013986	0.22523	31	19.25	0.35365	0.9272
ceramide pool	43	7.1034	0.11688	0.88791	4.5299	0.33966	0.96583	23.934	0.037962	0.36776	23	19.486	0.013986	0.22523	20	14.197	0.52248	0.93794
choline	23	7.1052	0.11888	0.88791	-6.59	0.94306	1	12.532	0.3996	0.90201	14	12.312	0.13586	0.60058	9	4.6787	0.90509	1
FAD	85	7.5117	0.13686	0.88791	-7.2376	0.98701	1	17.57	0.92707	1	58	14.317	0.66933	1	26	11.994	0.87313	1
SAM	150	7.53	0.18182	0.88791	-2.9392	0.92607	0.99897	31.226	0.40559	0.9024	91	23.233	0.1978	0.62147	59	20.935	0.82218	1
tyrosine	55	7.5441	0.11289	0.88791	0.89835	0.61938	0.96583	26.307	0.032967	0.34066	33	18.571	0.048951	0.3858	22	18.85	0.16184	0.9272
N-acetyl-LTE4	58	7.7988	0.11289	0.88791	-3.5871	0.88012	0.96751	22.514	0.18681	0.64827	33	19.363	0.030969	0.28801	25	12.046	0.85315	1
SAH	147	7.8095	0.17582	0.88791	-3.1721	0.93207	1	32.45	0.27872	0.76238	89	23.992	0.13287	0.60058	58	21.941	0.74426	0.9873
ADP	442	9.8405	0.22577	0.88791	8.7276	0.47552	0.96583	66.647	0.000999	0.066362	254	46.889	0.001998	0.13272	187	48.417	0.17183	0.9272
5,10-methylene-THF	25	1.8518	0.45754	0.88893	-1.5386	0.72627	0.96583	11.219	0.60639	1	12	9.5622	0.24875	0.69404	13	6.3708	0.91309	1
malonyl-CoA	20	1.8864	0.46454	0.88893	0.89173	0.51449	0.96583	12.203	0.37363	0.88581	10	9.7272	0.21878	0.64798	10	7.5308	0.76523	1
pyruvate	51	2.4013	0.46454	0.88893	1.8302	0.57143	0.96583	16.037	0.65634	1	29	11.516	0.48751	1	22	11.196	0.82717	1
15(S)-HPETE	41	2.5226	0.46454	0.88893	-2.3779	0.81718	0.96583	2.1957	1	1	27	1.9195	1	1	14	1.0919	1	1
3-carboxy-alpha-chromanol	44	2.6281	0.46154	0.88893	-0.63587	0.71628	0.96583	9.6566	0.97003	1	32	6.0473	0.94805	1	11	11.474	0.40859	0.9272
gamma-carboxyethyl-hydroxychroman	44	2.6281	0.46154	0.88893	-0.63587	0.71628	0.96583	9.6566	0.97003	1	32	6.0473	0.94805	1	11	11.474	0.40859	0.9272
prostaglandin A1	24	1.7504	0.46753	0.89099	1.0769	0.53846	0.96583	10.351	0.65534	1	15	6.7478	0.64735	1	9	8.1915	0.5994	0.96529
reverse triiodthyronine	27	1.4199	0.5005	0.90237	-1.4199	0.73726	0.96583	-1.2508	1	1	22	-1.2391	1	1	4	3.761	0.72128	0.9873
5beta-cholestane-3alpha,7alpha,12alpha,24s,25-pentol	30	1.5093	0.5035	0.90237	0.87561	0.56943	0.96583	11.192	0.73427	1	18	6.5562	0.72028	1	12	9.6656	0.62238	0.97772
prostaglandin A2	23	1.7015	0.47752	0.90237	1.1866	0.49151	0.96583	10.67	0.60739	1	14	7.1083	0.56543	1	9	8.1915	0.5994	0.96529
phosphatidate-LD-TAG pool	30	1.7376	0.49151	0.90237	3.0326	0.4016	0.96583	16.618	0.20979	0.65527	20	9.6192	0.44456	0.94163	10	15.18	0.12787	0.9272
12-keto-LTB4	31	1.8078	0.50649	0.90237	0.67982	0.57043	0.96583	10.718	0.8012	1	19	7.2174	0.68132	1	12	8.1449	0.76424	1
HCO3-	52	2.0375	0.5015	0.90237	-1.3696	0.77223	0.96583	11.549	0.95604	1	33	7.7629	0.88312	1	19	8.8759	0.92807	1
10-HETE	31	2.0938	0.49151	0.90237	-1.9247	0.76124	0.96583	1.816	1	1	20	2.4513	0.98801	1	10	2.3268	0.995	1
(5Z,8Z,11Z)-eicosatrienoyl-CoA	40	2.1229	0.49451	0.90237	6.6107	0.19181	0.83974	24.615	0.032967	0.34066	22	15.937	0.064935	0.45067	18	19.075	0.1039	0.9272
(13Z)-octadecenoyl-CoA	39	2.1464	0.49151	0.90237	1.935	0.51548	0.96583	19.288	0.16783	0.60032	21	13.744	0.13287	0.60058	18	13.546	0.48252	0.9272
(9E)-octadecenoyl-CoA	39	2.1464	0.49151	0.90237	1.935	0.51548	0.96583	19.288	0.16783	0.60032	21	13.744	0.13287	0.60058	18	13.546	0.48252	0.9272
(9E)-tetradecenoyl-CoA	39	2.1464	0.49151	0.90237	1.935	0.51548	0.96583	19.288	0.16783	0.60032	21	13.744	0.13287	0.60058	18	13.546	0.48252	0.9272
(11Z,14Z)-eicosadienoyl-CoA	46	2.3245	0.4975	0.90237	1.4336	0.55445	0.96583	17.31	0.43956	0.93322	26	12.056	0.37263	0.85778	20	12.507	0.6983	0.9873
(11Z,14Z,17Z)-eicosatrienoyl-CoA	46	2.3245	0.4975	0.90237	1.4336	0.55445	0.96583	17.31	0.43956	0.93322	26	12.056	0.37263	0.85778	20	12.507	0.6983	0.9873
10,13,16,19-docosatetraenoyl-CoA	46	2.3245	0.4975	0.90237	1.4336	0.55445	0.96583	17.31	0.43956	0.93322	26	12.056	0.37263	0.85778	20	12.507	0.6983	0.9873
9-eicosenoyl-CoA	46	2.3245	0.4975	0.90237	1.4336	0.55445	0.96583	17.31	0.43956	0.93322	26	12.056	0.37263	0.85778	20	12.507	0.6983	0.9873
acetate	62	2.362	0.48951	0.90237	-0.7029	0.76523	0.96583	13.887	0.94505	1	35	9.8982	0.76024	1	27	9.7738	0.97003	1
PAPS	57	2.4721	0.50549	0.90237	1.5443	0.57243	0.96583	16.645	0.70629	1	31	12.551	0.38162	0.86562	26	10.94	0.92108	1
S-(9-deoxy-delta12-PGD2)-glutathione	21	0.32419	0.58242	0.9043	5.5491	0.24875	0.8443	12.755	0.38661	0.88581	13	6.7796	0.56144	1	8	12.022	0.22777	0.9272
S-(9-deoxy-delta9,12-PGD2)-glutathione	21	0.32419	0.58242	0.9043	5.5491	0.24875	0.8443	12.755	0.38661	0.88581	13	6.7796	0.56144	1	8	12.022	0.22777	0.9272
S-(PGJ2)-glutathione	21	0.32419	0.58242	0.9043	5.5491	0.24875	0.8443	12.755	0.38661	0.88581	13	6.7796	0.56144	1	8	12.022	0.22777	0.9272
prostaglandin J2	21	0.32419	0.58242	0.9043	5.5491	0.24875	0.8443	12.755	0.38661	0.88581	13	6.7796	0.56144	1	8	12.022	0.22777	0.9272
3-oxopropionyl-CoA	26	0.7223	0.58342	0.9043	1.8395	0.45654	0.96583	11.193	0.64336	1	16	5.8504	0.73127	1	10	10.649	0.46853	0.9272
3alpha,7alpha,12alpha,25-tetrahydroxy-5beta-cholestane-24-one	26	0.7223	0.58342	0.9043	1.8395	0.45654	0.96583	11.193	0.64336	1	16	5.8504	0.73127	1	10	10.649	0.46853	0.9272
9-cis-4-oxo-13,14-dihydro-retinoate	26	0.7223	0.58342	0.9043	1.8395	0.45654	0.96583	11.193	0.64336	1	16	5.8504	0.73127	1	10	10.649	0.46853	0.9272
alpha-hydroxyisocaproic acid	26	0.7223	0.58342	0.9043	1.8395	0.45654	0.96583	11.193	0.64336	1	16	5.8504	0.73127	1	10	10.649	0.46853	0.9272
13,14-dihydro-15-oxo-lipoxin A4	27	0.76587	0.56144	0.9043	1.748	0.49051	0.96583	10.844	0.71728	1	17	5.4991	0.81518	1	10	10.649	0.46853	0.9272
15-oxo-lipoxin A4	27	0.76587	0.56144	0.9043	1.748	0.49051	0.96583	10.844	0.71728	1	17	5.4991	0.81518	1	10	10.649	0.46853	0.9272
(6Z,9Z,12Z,15Z,18Z,21Z)-tetracosahexaenoyl-CoA	34	0.93667	0.56244	0.9043	8.5363	0.12787	0.83152	23.271	0.027972	0.32517	17	15.114	0.04995	0.38711	17	17.795	0.14086	0.9272
alpha-CEHC-glucuronide	20	0.96931	0.54246	0.9043	-0.96931	0.65235	0.96583	-3.9852	1	1	17	-2.6692	1	1	2	0.98478	0.84116	1
gamma-CEHC-glucuronide	20	0.96931	0.54246	0.9043	-0.96931	0.65235	0.96583	-3.9852	1	1	17	-2.6692	1	1	2	0.98478	0.84116	1
hexacosanoyl-CoA	34	0.99276	0.55644	0.9043	3.3785	0.41059	0.96583	17.113	0.24076	0.69536	17	12.075	0.17682	0.60058	17	12.127	0.61239	0.96529
12,13-hydroxyoctadec-9(z)-enoate	20	1.0548	0.53546	0.9043	-1.0548	0.65734	0.96583	-3.9555	1	1	17	-2.6371	1	1	2	0.98478	0.84116	1
9,10-hydroxyoctadec-12(Z)-enoate	20	1.0548	0.53546	0.9043	-1.0548	0.65734	0.96583	-3.9555	1	1	17	-2.6371	1	1	2	0.98478	0.84116	1
(5Z,8Z,11Z,14Z,17Z)-eicosapentaenoyl-CoA	51	1.0773	0.57942	0.9043	6.6573	0.24775	0.8443	23.419	0.095904	0.53146	28	14.518	0.15185	0.60058	23	18.855	0.18981	0.9272
(6Z,9Z,12Z,15Z)-octadecatetraenoyl-CoA	52	1.1334	0.56643	0.9043	6.5265	0.25774	0.85607	23.147	0.1049	0.53146	29	14.203	0.22378	0.65208	23	18.855	0.18981	0.9272
formate	51	1.1772	0.57043	0.9043	4.4987	0.37463	0.96583	13.045	0.8961	1	30	8.427	0.79321	1	20	12.346	0.71129	0.9873
(10Z)-heptadecenoyl-CoA	28	1.2172	0.54745	0.9043	3.5997	0.37363	0.96583	14.949	0.32368	0.82698	13	11.311	0.16384	0.60058	15	9.8935	0.74525	0.9873
9-heptadecenoyl-CoA	28	1.2172	0.54745	0.9043	3.5997	0.37363	0.96583	14.949	0.32368	0.82698	13	11.311	0.16384	0.60058	15	9.8935	0.74525	0.9873
5-S-glutathionyl-dopamine	21	1.2294	0.51449	0.9043	4.6439	0.2997	0.93215	13.647	0.28472	0.77423	13	8.2083	0.42757	0.93122	8	11.647	0.24775	0.9272
heptadecanoyl-CoA	42	1.2308	0.57742	0.9043	2.7021	0.46254	0.96583	16.234	0.48152	0.96083	22	11.224	0.31668	0.78747	20	11.754	0.76124	1
(6Z,9Z,12Z,15Z,18Z)-tetracosapentaenoyl-CoA	32	1.2421	0.54346	0.9043	3.2637	0.4016	0.96583	17.574	0.17483	0.61586	16	12.636	0.13886	0.60058	16	12.217	0.55544	0.96016
4-androstene-3,17-dione	47	1.2906	0.55844	0.9043	0.77219	0.62138	0.96583	7.0909	0.997	1	29	4.5433	0.97902	1	17	7.8475	0.92807	1
estradiol-17beta	54	1.4196	0.57542	0.9043	-1.2911	0.78122	0.96583	0.36373	1	1	37	0.46759	1	1	15	4.1951	0.98901	1
testosterone	47	1.4244	0.54645	0.9043	0.63837	0.63037	0.96583	5.911	1	1	30	3.6572	0.99201	1	16	7.1755	0.94306	1
4-methyl-2-oxopentanoate	34	1.4536	0.51548	0.9043	0.78658	0.60539	0.96583	12.511	0.69131	1	22	6.96	0.76623	1	12	11.635	0.41958	0.9272
(7Z,10Z,13Z,16Z,19Z)-docosapentaenoyl-CoA	49	1.5298	0.56843	0.9043	2.1114	0.52947	0.96583	18.453	0.36763	0.88581	27	12.494	0.31469	0.78747	22	13.698	0.58342	0.96529
CMP	55	1.5548	0.56244	0.9043	5.3367	0.32567	0.96121	26.975	0.021978	0.32259	29	18.424	0.038961	0.3294	26	19.776	0.20779	0.9272
(8Z,11Z,14Z,17Z)-eicosatetraenoyl-CoA	50	1.6281	0.54945	0.9043	6.1835	0.24575	0.8443	22.042	0.14785	0.55445	28	13.722	0.20679	0.62441	22	17.748	0.23876	0.9272
nonadecanoyl-CoA	42	1.7515	0.52448	0.9043	2.1814	0.5005	0.96583	15.697	0.53846	1	23	10.819	0.41758	0.92907	19	11.434	0.73227	0.9873
(4Z,7Z,10Z,13Z,16Z,19Z)-docosahexaenoyl-CoA	43	1.7562	0.52947	0.9043	2.1308	0.4995	0.96583	19.486	0.22378	0.67133	23	13.72	0.17682	0.60058	20	13.86	0.56244	0.9614
(7Z,10Z,13Z,16Z)-docosatetraenoyl-CoA	48	1.7729	0.54545	0.9043	1.906	0.54146	0.96583	18.499	0.36064	0.88581	27	12.519	0.31269	0.78747	21	13.772	0.6034	0.96529
1-phosphatidyl-1D-myo-inositol-3,4-bisphosphate	41	1.8164	0.52747	0.9043	2.2641	0.47253	0.96583	12.886	0.78022	1	24	8.9117	0.65035	1	17	9.4237	0.84515	1
(6Z,9Z)-octadecadienoyl-CoA	48	1.8403	0.54046	0.9043	6.1324	0.23177	0.83974	22.442	0.1039	0.53146	27	14.121	0.18981	0.61721	21	17.918	0.22078	0.9272
linolenoyl-CoA	48	1.8403	0.54046	0.9043	6.1324	0.23177	0.83974	22.442	0.1039	0.53146	27	14.121	0.18981	0.61721	21	17.918	0.22078	0.9272
4-oxo-9-cis-retinoate	45	1.8528	0.51648	0.9043	0.11572	0.67632	0.96583	6.5953	0.998	1	32	3.0733	1	1	12	10.123	0.58641	0.96529
(8Z,11Z)-eicosadienoyl-CoA	42	1.8808	0.51049	0.9043	6.6423	0.23477	0.83974	24.08	0.025974	0.32517	23	15.428	0.090909	0.55622	19	18.826	0.12787	0.9272
dAMP	32	0.66248	0.58941	0.90754	9.8437	0.085914	0.83152	28.814	0.001998	0.11613	19	15.696	0.046953	0.37643	13	26.231	0.001998	0.75487
eicosanoyl-CoA	51	1.0333	0.58841	0.90754	2.5358	0.52547	0.96583	17.868	0.46653	0.95148	28	11.732	0.37762	0.865	23	13.663	0.65634	0.9873
1-phosphatidyl-myo-inositol-3,5-bisphosphate	29	0.53603	0.5994	0.91987	4.3158	0.33666	0.96583	12.854	0.52647	1	18	7.3761	0.64635	1	11	11.435	0.41059	0.9272
palmitoleoyl-CoA	45	0.87631	0.6044	0.92449	2.9233	0.44655	0.96583	17.727	0.38761	0.88581	23	12.182	0.2957	0.77249	22	12.898	0.66633	0.9873
phosphatidate-LD-SM pool	20	0.30642	0.60939	0.92603	5.5359	0.23277	0.83974	14.418	0.21079	0.65527	13	7.3012	0.51249	1	7	14.421	0.073926	0.9272
phosphatidate-bile-PC pool	20	0.30642	0.60939	0.92603	5.5359	0.23277	0.83974	14.418	0.21079	0.65527	13	7.3012	0.51249	1	7	14.421	0.073926	0.9272
sulfate	39	0.85233	0.61538	0.92907	2.0378	0.50749	0.96583	16.99	0.36264	0.88581	25	9.5523	0.60539	1	14	15.592	0.18082	0.9272
(7Z)-tetradecenoyl-CoA	39	0.87351	0.61339	0.92907	3.2079	0.42358	0.96583	19.372	0.16184	0.59256	19	13.775	0.11189	0.60058	20	13.625	0.58641	0.96529
GSSG	22	0.15405	0.62438	0.93355	4.4296	0.28072	0.91283	14.958	0.1998	0.65527	11	8.4495	0.34266	0.81768	11	12.704	0.31469	0.9272
arachidonate	76	1.3376	0.62238	0.93355	1.8216	0.6044	0.96583	10.267	1	1	46	7.0381	0.98501	1	28	10.997	0.94905	1
O2	226	3.4661	0.62438	0.93355	8.8009	0.29371	0.92593	37.682	0.4985	0.97396	136	23.728	0.56943	1	88	32.64	0.27373	0.9272
(11Z)-eicosenoyl-CoA	46	1.1524	0.62737	0.93503	2.6056	0.46254	0.96583	17.387	0.42857	0.93322	24	11.949	0.2997	0.77423	22	12.662	0.69131	0.9873
dopamine-O-quinone	27	-0.13349	0.64535	0.94965	7.8274	0.16184	0.83152	16.528	0.19281	0.65442	16	8.0715	0.4965	1	11	16.16	0.0999	0.9272
gamma-linolenoyl-CoA	48	0.54558	0.64436	0.94965	7.4271	0.17882	0.83152	23.969	0.053946	0.43304	25	15.127	0.11489	0.60058	23	18.855	0.18981	0.9272
(4Z,7Z,10Z,13Z,16Z)-docosapentaenoyl-CoA	44	0.59166	0.64336	0.94965	5.2203	0.29471	0.92593	21.092	0.12787	0.53146	24	13.362	0.1998	0.62354	20	16.647	0.30969	0.9272
Na+	118	1.8887	0.63936	0.94965	6.6447	0.32867	0.96121	24.577	0.75325	1	76	13.532	0.9011	1	42	22.992	0.31469	0.9272
(10Z)-heptadecenoic acid	32	-2.2575	0.82817	0.9507	6.9502	0.17882	0.83152	10.708	0.82318	1	17	5.6546	0.7982	1	14	12.153	0.45355	0.9272
(11Z,14Z)-eicosadienoic acid	32	-2.2575	0.82817	0.9507	6.9502	0.17882	0.83152	10.708	0.82318	1	17	5.6546	0.7982	1	14	12.153	0.45355	0.9272
(11Z,14Z,17Z)-eicosatrienoic acid	32	-2.2575	0.82817	0.9507	6.9502	0.17882	0.83152	10.708	0.82318	1	17	5.6546	0.7982	1	14	12.153	0.45355	0.9272
(13Z)-eicosenoic acid	32	-2.2575	0.82817	0.9507	6.9502	0.17882	0.83152	10.708	0.82318	1	17	5.6546	0.7982	1	14	12.153	0.45355	0.9272
(13Z)-octadecenoic acid	32	-2.2575	0.82817	0.9507	6.9502	0.17882	0.83152	10.708	0.82318	1	17	5.6546	0.7982	1	14	12.153	0.45355	0.9272
(13Z,16Z)-docosadienoic acid	32	-2.2575	0.82817	0.9507	6.9502	0.17882	0.83152	10.708	0.82318	1	17	5.6546	0.7982	1	14	12.153	0.45355	0.9272
(4Z,7Z,10Z,13Z,16Z)-DPA	32	-2.2575	0.82817	0.9507	6.9502	0.17882	0.83152	10.708	0.82318	1	17	5.6546	0.7982	1	14	12.153	0.45355	0.9272
(6Z,9Z)-octadecadienoic acid	32	-2.2575	0.82817	0.9507	6.9502	0.17882	0.83152	10.708	0.82318	1	17	5.6546	0.7982	1	14	12.153	0.45355	0.9272
(6Z,9Z,12Z,15Z,18Z)-TPA	32	-2.2575	0.82817	0.9507	6.9502	0.17882	0.83152	10.708	0.82318	1	17	5.6546	0.7982	1	14	12.153	0.45355	0.9272
(6Z,9Z,12Z,15Z,18Z,21Z)-THA	32	-2.2575	0.82817	0.9507	6.9502	0.17882	0.83152	10.708	0.82318	1	17	5.6546	0.7982	1	14	12.153	0.45355	0.9272
(7Z)-octadecenoic acid	32	-2.2575	0.82817	0.9507	6.9502	0.17882	0.83152	10.708	0.82318	1	17	5.6546	0.7982	1	14	12.153	0.45355	0.9272
(7Z)-tetradecenoic acid	32	-2.2575	0.82817	0.9507	6.9502	0.17882	0.83152	10.708	0.82318	1	17	5.6546	0.7982	1	14	12.153	0.45355	0.9272
(9Z,12Z,15Z,18Z)-TTA	32	-2.2575	0.82817	0.9507	6.9502	0.17882	0.83152	10.708	0.82318	1	17	5.6546	0.7982	1	14	12.153	0.45355	0.9272
(9Z,12Z,15Z,18Z,21Z)-TPA	32	-2.2575	0.82817	0.9507	6.9502	0.17882	0.83152	10.708	0.82318	1	17	5.6546	0.7982	1	14	12.153	0.45355	0.9272
10,13,16,19-docosatetraenoic acid	32	-2.2575	0.82817	0.9507	6.9502	0.17882	0.83152	10.708	0.82318	1	17	5.6546	0.7982	1	14	12.153	0.45355	0.9272
10,13,16-docosatriynoic acid	32	-2.2575	0.82817	0.9507	6.9502	0.17882	0.83152	10.708	0.82318	1	17	5.6546	0.7982	1	14	12.153	0.45355	0.9272
12,15,18,21-tetracosatetraenoic acid	32	-2.2575	0.82817	0.9507	6.9502	0.17882	0.83152	10.708	0.82318	1	17	5.6546	0.7982	1	14	12.153	0.45355	0.9272
13,16,19-docosatrienoic acid	32	-2.2575	0.82817	0.9507	6.9502	0.17882	0.83152	10.708	0.82318	1	17	5.6546	0.7982	1	14	12.153	0.45355	0.9272
7-palmitoleic acid	32	-2.2575	0.82817	0.9507	6.9502	0.17882	0.83152	10.708	0.82318	1	17	5.6546	0.7982	1	14	12.153	0.45355	0.9272
8,11-eicosadienoic acid	32	-2.2575	0.82817	0.9507	6.9502	0.17882	0.83152	10.708	0.82318	1	17	5.6546	0.7982	1	14	12.153	0.45355	0.9272
9-eicosenoic acid	32	-2.2575	0.82817	0.9507	6.9502	0.17882	0.83152	10.708	0.82318	1	17	5.6546	0.7982	1	14	12.153	0.45355	0.9272
9-heptadecylenic acid	32	-2.2575	0.82817	0.9507	6.9502	0.17882	0.83152	10.708	0.82318	1	17	5.6546	0.7982	1	14	12.153	0.45355	0.9272
DHA	32	-2.2575	0.82817	0.9507	6.9502	0.17882	0.83152	10.708	0.82318	1	17	5.6546	0.7982	1	14	12.153	0.45355	0.9272
DPA	32	-2.2575	0.82817	0.9507	6.9502	0.17882	0.83152	10.708	0.82318	1	17	5.6546	0.7982	1	14	12.153	0.45355	0.9272
adrenic acid	32	-2.2575	0.82817	0.9507	6.9502	0.17882	0.83152	10.708	0.82318	1	17	5.6546	0.7982	1	14	12.153	0.45355	0.9272
cerotic acid	32	-2.2575	0.82817	0.9507	6.9502	0.17882	0.83152	10.708	0.82318	1	17	5.6546	0.7982	1	14	12.153	0.45355	0.9272
cis-cetoleic acid	32	-2.2575	0.82817	0.9507	6.9502	0.17882	0.83152	10.708	0.82318	1	17	5.6546	0.7982	1	14	12.153	0.45355	0.9272
elaidate	32	-2.2575	0.82817	0.9507	6.9502	0.17882	0.83152	10.708	0.82318	1	17	5.6546	0.7982	1	14	12.153	0.45355	0.9272
gamma-linolenate	32	-2.2575	0.82817	0.9507	6.9502	0.17882	0.83152	10.708	0.82318	1	17	5.6546	0.7982	1	14	12.153	0.45355	0.9272
henicosanoic acid	32	-2.2575	0.82817	0.9507	6.9502	0.17882	0.83152	10.708	0.82318	1	17	5.6546	0.7982	1	14	12.153	0.45355	0.9272
linolenate	32	-2.2575	0.82817	0.9507	6.9502	0.17882	0.83152	10.708	0.82318	1	17	5.6546	0.7982	1	14	12.153	0.45355	0.9272
mead acid	32	-2.2575	0.82817	0.9507	6.9502	0.17882	0.83152	10.708	0.82318	1	17	5.6546	0.7982	1	14	12.153	0.45355	0.9272
nonadecylic acid	32	-2.2575	0.82817	0.9507	6.9502	0.17882	0.83152	10.708	0.82318	1	17	5.6546	0.7982	1	14	12.153	0.45355	0.9272
omega-3-arachidonic acid	32	-2.2575	0.82817	0.9507	6.9502	0.17882	0.83152	10.708	0.82318	1	17	5.6546	0.7982	1	14	12.153	0.45355	0.9272
physeteric acid	32	-2.2575	0.82817	0.9507	6.9502	0.17882	0.83152	10.708	0.82318	1	17	5.6546	0.7982	1	14	12.153	0.45355	0.9272
tricosanoic acid	32	-2.2575	0.82817	0.9507	6.9502	0.17882	0.83152	10.708	0.82318	1	17	5.6546	0.7982	1	14	12.153	0.45355	0.9272
ximenic acid	32	-2.2575	0.82817	0.9507	6.9502	0.17882	0.83152	10.708	0.82318	1	17	5.6546	0.7982	1	14	12.153	0.45355	0.9272
retinyl-ester	28	-2.2487	0.83417	0.9507	12.726	0.025974	0.43135	9.4498	0.85015	1	18	2.5627	0.96803	1	9	15.78	0.078921	0.9272
(9E)-tetradecenoic acid	33	-2.1707	0.83417	0.9507	6.7895	0.20579	0.83974	10.415	0.83616	1	18	5.3196	0.82517	1	14	12.153	0.45355	0.9272
oleate	33	-2.1707	0.83417	0.9507	6.7895	0.20579	0.83974	10.415	0.83616	1	18	5.3196	0.82517	1	14	12.153	0.45355	0.9272
palmitolate	33	-2.1707	0.83417	0.9507	6.7895	0.20579	0.83974	10.415	0.83616	1	18	5.3196	0.82517	1	14	12.153	0.45355	0.9272
fructose	27	-2.0857	0.79021	0.9507	4.6478	0.32567	0.96121	8.0588	0.91608	1	14	4.9428	0.80719	1	12	9.1193	0.67932	0.9873
eicosanoate	33	-2.0489	0.82717	0.9507	6.6677	0.21279	0.83974	10.623	0.81718	1	18	5.6006	0.80919	1	14	12.153	0.45355	0.9272
lignocerate	33	-2.0489	0.82717	0.9507	6.6677	0.21279	0.83974	10.623	0.81718	1	18	5.6006	0.80919	1	14	12.153	0.45355	0.9272
THF	24	-2.0256	0.81019	0.9507	10.12	0.06993	0.83152	17.165	0.11389	0.53146	10	10.551	0.16384	0.60058	14	13.557	0.33467	0.9272
SM pool	24	-1.9854	0.80919	0.9507	8.9338	0.093906	0.83152	12.613	0.44356	0.93322	10	8.0395	0.32867	0.80438	13	12.364	0.41159	0.9272
stearate	34	-1.9671	0.80919	0.9507	6.5154	0.21479	0.83974	10.338	0.85814	1	19	5.2803	0.85914	1	14	12.153	0.45355	0.9272
dopaminochrome	26	-1.786	0.8012	0.9507	9.6264	0.08991	0.83152	15.224	0.26374	0.73878	14	6.623	0.61938	1	12	15.256	0.14685	0.9272
2-hydroxyestradiol-17beta	36	-1.7475	0.80619	0.9507	6.2566	0.20579	0.83974	9.55	0.91109	1	21	2.9246	0.98102	1	15	11.334	0.60639	0.96529
cis-erucic acid	33	-1.7438	0.8022	0.9507	6.3625	0.22478	0.83974	10.974	0.79421	1	18	6.0766	0.77323	1	14	12.153	0.45355	0.9272
cis-gondoic acid	33	-1.7438	0.8022	0.9507	6.3625	0.22478	0.83974	10.974	0.79421	1	18	6.0766	0.77323	1	14	12.153	0.45355	0.9272
cis-vaccenic acid	33	-1.7438	0.8022	0.9507	6.3625	0.22478	0.83974	10.974	0.79421	1	18	6.0766	0.77323	1	14	12.153	0.45355	0.9272
nervonic acid	33	-1.7438	0.8022	0.9507	6.3625	0.22478	0.83974	10.974	0.79421	1	18	6.0766	0.77323	1	14	12.153	0.45355	0.9272
stearidonic acid	33	-1.7438	0.8022	0.9507	6.3625	0.22478	0.83974	10.974	0.79421	1	18	6.0766	0.77323	1	14	12.153	0.45355	0.9272
retinol	50	-1.6768	0.82917	0.9507	11.32	0.07992	0.83152	12.428	0.93207	1	32	4.6277	0.98801	1	17	16.956	0.1968	0.9272
behenic acid	35	-1.6584	0.81019	0.9507	6.1393	0.22178	0.83974	10.812	0.84016	1	19	6.0471	0.8042	1	15	11.83	0.55145	0.9568
4-(n-nitrosomethylamino)-1-(3-pyridyl)-1-butanone	24	-1.6226	0.78222	0.9507	9.9878	0.071928	0.83152	9.9413	0.70929	1	14	3.9408	0.88212	1	9	14.056	0.13187	0.9272
(2E)-octadecenoyl-CoA	28	-1.5921	0.79321	0.9507	6.5298	0.19281	0.83974	16.066	0.24076	0.69536	15	8.7478	0.42857	0.93122	13	14.182	0.25974	0.9272
phosphatidylinositol-3,5-bisphosphate	39	-1.4862	0.79221	0.9507	5.67	0.25574	0.85555	14.593	0.61039	1	22	7.9507	0.66034	1	17	13.058	0.51249	0.93794
docosanoyl-CoA	50	-1.373	0.80619	0.9507	6.8251	0.20979	0.83974	18.894	0.38561	0.88581	25	11.325	0.43157	0.93122	25	15.396	0.56244	0.9614
K+	35	-1.3223	0.78921	0.9507	3.5305	0.37163	0.96583	12.893	0.65235	1	23	6.1646	0.86513	1	12	13.484	0.24675	0.9272
(13Z)-eicosenoyl-CoA	45	-1.3181	0.79021	0.9507	5.1177	0.3017	0.93215	17.303	0.41558	0.92022	20	11.514	0.28172	0.74857	25	12.916	0.7972	1
dADP	36	-1.206	0.75724	0.9507	9.9153	0.085914	0.83152	25.921	0.007992	0.16158	18	14.531	0.080919	0.5226	18	22.128	0.024975	0.75487
6,7-dihydro-5-oxo-12-epi-LTB4	38	-0.98783	0.77023	0.9507	3.2878	0.40759	0.96583	5.8904	0.995	1	22	2.9577	0.98601	1	15	7.9133	0.89411	1
6,7-dihydro-5-oxo-LTB4	38	-0.98783	0.77023	0.9507	3.2878	0.40759	0.96583	5.8904	0.995	1	22	2.9577	0.98601	1	15	7.9133	0.89411	1
arachidonyl-CoA	65	-0.98365	0.81818	0.9507	7.8349	0.2008	0.83974	23.756	0.17782	0.62171	32	14.601	0.23277	0.66813	33	18.962	0.45255	0.9272
ubiquinol	76	-0.97891	0.80919	0.9507	0.97891	0.65734	0.96583	17.491	0.86214	1	37	11.761	0.59341	1	39	12.961	0.97802	1
ubiquinone	76	-0.97891	0.80919	0.9507	0.97891	0.65734	0.96583	17.491	0.86214	1	37	11.761	0.59341	1	39	12.961	0.97802	1
retinal	24	-0.93561	0.71429	0.9507	3.6596	0.35065	0.96583	4.1387	0.99001	1	15	2.0156	0.97902	1	8	7.311	0.66234	0.9873
(9Z,12Z,15Z,18Z,21Z)-tetracosapentaenoyl-CoA	36	-0.92522	0.73926	0.9507	10.131	0.080919	0.83152	22.037	0.037962	0.36776	17	13.317	0.1009	0.59228	19	17.738	0.17782	0.9272
NH3	64	-0.78811	0.78921	0.9507	9.9501	0.092907	0.83152	20.113	0.46254	0.94749	32	12.656	0.4016	0.90214	31	17.515	0.53247	0.94143
(15Z)-tetracosenoyl-CoA	43	-0.77401	0.75924	0.9507	6.6532	0.23277	0.83974	17.193	0.39261	0.89055	21	10.701	0.36264	0.85165	22	13.582	0.5994	0.96529
acetaldehyde	23	-0.64944	0.70529	0.9507	3.3735	0.35165	0.96583	7.8925	0.85015	1	16	3.1533	0.93806	1	7	9.539	0.35465	0.9272
dihomo-gamma-linolenoyl-CoA	43	-0.6172	0.73926	0.9507	9.0407	0.12488	0.83152	19.991	0.18881	0.65035	22	11.498	0.2997	0.77423	21	16.837	0.3027	0.9272
propanoyl-CoA	66	-0.58964	0.76424	0.9507	5.3351	0.33566	0.96583	26.268	0.094905	0.53146	34	16.739	0.12887	0.60058	32	20.47	0.2977	0.9272
(13Z)-docosenoyl-CoA	43	-0.50769	0.73027	0.9507	4.3946	0.34366	0.96583	16.597	0.44755	0.93322	21	10.789	0.34865	0.82296	22	12.662	0.69131	0.9873
tetracosanoyl-CoA	45	-0.3453	0.71129	0.9507	6.0923	0.25075	0.84492	17.088	0.43656	0.93322	23	10.618	0.44555	0.94163	22	13.582	0.5994	0.96529
EPA	36	-0.24746	0.6983	0.9507	4.6844	0.3027	0.93215	11.652	0.79121	1	20	7.3814	0.66134	1	15	11.648	0.57343	0.96529
1D-myo-inositol-1,4-bisphosphate	20	-0.19165	0.65235	0.9507	6.0571	0.21079	0.83974	14.733	0.19181	0.65442	10	9.2373	0.25375	0.69818	10	11.599	0.37762	0.9272
3,5-diiodo-L-thyronine	23	-0.18251	0.65634	0.9507	0.18251	0.57343	0.96583	-2.5132	1	1	18	-2.6789	1	1	4	3.761	0.72128	0.9873
(9Z,12Z,15Z,18Z)-tetracosatetraenoyl-CoA	33	-0.16745	0.67233	0.9507	4.6044	0.32667	0.96121	16.213	0.30869	0.81097	16	10.784	0.25774	0.705	17	12.127	0.61239	0.96529
dihomo-gamma-linolenate	36	-0.1516	0.69031	0.9507	4.5886	0.30569	0.93518	11.838	0.78122	1	20	7.6736	0.63936	1	15	11.599	0.58042	0.96529
stearoyl-CoA	55	-0.077534	0.71329	0.9507	3.5144	0.44156	0.96583	17.933	0.55744	1	28	11.615	0.38861	0.87721	27	13.767	0.7982	1
phosphatidylinositol-3,4,5-trisphosphate	47	-0.076865	0.66933	0.9507	5.7936	0.29171	0.92593	17.932	0.42458	0.93322	27	10.147	0.56344	1	20	15.7	0.37962	0.9272
heneicosanoyl-CoA	39	0.032939	0.68232	0.9507	4.0485	0.35864	0.96583	14.833	0.57742	1	20	9.5687	0.44855	0.94163	19	11.434	0.73227	0.9873
linoleate	62	0.070319	0.7003	0.9507	3.3936	0.48951	0.96583	9.7863	0.997	1	37	5.6789	0.98701	1	24	10.354	0.93706	1
5-tetradecenoyl-CoA	41	0.44394	0.66633	0.9507	3.5367	0.37163	0.96583	20.39	0.13487	0.53146	20	14.197	0.098901	0.5896	21	14.635	0.51648	0.93794
7-hexadecenoyl-CoA	41	0.44394	0.66633	0.9507	3.5367	0.37163	0.96583	20.39	0.13487	0.53146	20	14.197	0.098901	0.5896	21	14.635	0.51648	0.93794
oleoyl-CoA	54	0.46859	0.67333	0.9507	7.0481	0.20979	0.83974	24.095	0.076923	0.50379	27	15.553	0.12288	0.60058	27	18.523	0.35465	0.9272
cis-vaccenoyl-CoA	46	0.65492	0.66334	0.9507	3.1031	0.42258	0.96583	17.901	0.37862	0.88581	23	12.364	0.27872	0.74486	23	12.952	0.71329	0.9873
linoleoyl-CoA	57	0.69563	0.66633	0.9507	6.6206	0.23876	0.8443	22.83	0.16184	0.59256	28	15.198	0.12288	0.60058	29	17.073	0.52847	0.93794
palmitoyl-CoA	80	1.4975	0.65235	0.9507	1.3522	0.64835	0.96583	21.301	0.59041	1	42	15.003	0.33367	0.81052	38	15.134	0.88511	1
4-(methylnitrosamino)-1-(3-pyridyl)-1-butanol	27	-2.9924	0.84016	0.95388	10.679	0.077922	0.83152	4.9953	0.99401	1	20	-1.5885	1	1	6	16.848	0.023976	0.75487
ferricytochrome C	33	-2.3885	0.84515	0.95388	4.6626	0.32567	0.96121	9.832	0.86513	1	16	4.4306	0.86613	1	17	9.4001	0.84815	1
ferrocytochrome C	33	-2.3885	0.84515	0.95388	4.6626	0.32567	0.96121	9.832	0.86513	1	16	4.4306	0.86613	1	17	9.4001	0.84815	1
1-phosphatidyl-1D-myo-inositol-5-phosphate	44	-1.834	0.84316	0.95388	5.7729	0.26673	0.87965	15.788	0.56144	1	24	8.7125	0.67033	1	20	13.874	0.55944	0.9614
cholesterol	51	-2.0566	0.85015	0.95719	11.75	0.070929	0.83152	25.023	0.044955	0.40318	24	15.717	0.090909	0.55622	26	21.556	0.10989	0.9272
myristoyl-CoA	47	-2.4156	0.85514	0.96049	9.9446	0.11688	0.83152	23.318	0.062937	0.45024	22	14.012	0.14186	0.60058	25	18.827	0.25275	0.9272
1-phosphatidyl-1D-myo-inositol-3-phosphate	43	-2.4505	0.85914	0.96265	8.4272	0.14985	0.83152	15.883	0.52348	1	25	7.6443	0.8032	1	18	15.54	0.29471	0.9272
margaric acid	34	-3.1575	0.87912	0.971	7.7058	0.14985	0.83152	11.246	0.7962	1	18	5.3196	0.82517	1	15	13.223	0.41459	0.9272
pentadecylic acid	34	-3.1575	0.87912	0.971	7.7058	0.14985	0.83152	11.246	0.7962	1	18	5.3196	0.82517	1	15	13.223	0.41459	0.9272
tridecylic acid	34	-3.1575	0.87912	0.971	7.7058	0.14985	0.83152	11.246	0.7962	1	18	5.3196	0.82517	1	15	13.223	0.41459	0.9272
peptidylproline-(omega=0)	35	-2.8777	0.87313	0.971	2.8777	0.41059	0.96583	9.1599	0.93906	1	16	4.5499	0.85714	1	19	8.2569	0.96004	1
peptidylproline-(omega=180)	35	-2.8777	0.87313	0.971	2.8777	0.41059	0.96583	9.1599	0.93906	1	16	4.5499	0.85714	1	19	8.2569	0.96004	1
CO2	124	-1.3087	0.87113	0.971	10.222	0.13686	0.83152	29.32	0.34565	0.87353	67	17.392	0.44056	0.94163	57	24.39	0.47153	0.9272
NH4+	49	-3.0253	0.88312	0.9719	6.7579	0.23477	0.83974	15.932	0.62937	1	25	8.3243	0.73826	1	24	14.269	0.63437	0.9873
myristic acid	36	-2.9987	0.88412	0.9719	7.4151	0.15085	0.83152	10.544	0.87612	1	20	4.5301	0.92008	1	15	13.223	0.41459	0.9272
D-myo-inositol-1,4,5-trisphosphate	24	-3.5616	0.89311	0.97716	8.8949	0.094905	0.83152	15.321	0.20779	0.65527	10	8.2207	0.31568	0.78747	14	13.112	0.37063	0.9272
palmitate	46	-2.9071	0.89211	0.97716	6.802	0.1988	0.83974	11.411	0.93407	1	24	5.5059	0.92108	1	21	12.794	0.70729	0.9873
NADH	256	0.1553	0.8961	0.97814	10.458	0.21179	0.83974	45.904	0.074925	0.50379	141	28.037	0.22478	0.65208	115	37.444	0.24975	0.9272
O2-	23	-3.5647	0.8991	0.97911	3.5647	0.33666	0.96583	7.7778	0.85415	1	11	3.1558	0.86414	1	12	7.7464	0.79321	1
2-oxobutyrate	20	-4.3946	0.90809	0.9866	10.237	0.06993	0.83152	8.6872	0.72927	1	8	3.4303	0.74126	1	12	8.4143	0.74126	0.9873
PS-LD pool	25	-4.2418	0.91109	0.98754	14.997	0.020979	0.43013	17.196	0.1039	0.53146	10	9.9361	0.2028	0.62441	14	16.776	0.11888	0.9272
nicotinamide	27	-12.342	1	1	19.885	0.003996	0.18581	21.001	0.026973	0.32517	10	5.2238	0.61638	1	17	22.46	0.018981	0.75487
ubiquitin	230	-10.398	1	1	25.628	0.000999	0.13272	47.461	0.010989	0.19653	114	22.888	0.45255	0.94365	116	44.14	0.013986	0.75487
1-radyl-2-acyl-sn-glycero-3-phosphocholine	42	-9.26	0.996	1	18.998	0.001998	0.13272	16.099	0.49151	0.96435	16	5.7346	0.74525	1	24	19.966	0.15984	0.9272
1,2-diacylglycerol-LD-PC pool	30	-9.0274	0.99301	1	23.338	0.001998	0.13272	13.972	0.44955	0.93322	15	-0.18308	0.999	1	15	19.942	0.04995	0.9272
1,2-diacylglycerol-LD-PS pool	28	-8.5386	0.996	1	23.352	0.000999	0.13272	14.231	0.4046	0.9024	16	-0.05514	0.996	1	12	21.802	0.010989	0.75487
phosphatidylinositol-4,5-bisphosphate	45	-8.263	0.99301	1	18	0.010989	0.3484	22.336	0.07992	0.50908	18	9.3606	0.43257	0.93122	27	21.193	0.15485	0.9272
1,2-diacylglycerol-LD-PI pool	42	-7.9954	0.99201	1	22.106	0.001998	0.13272	18.508	0.25974	0.73646	22	3.4121	0.97403	1	20	23.243	0.018981	0.75487
[protein]-N-ubiquityllysine	177	-7.7316	0.997	1	20.183	0.002997	0.1742	38.714	0.084915	0.53146	89	18.908	0.58442	1	88	35.89	0.073926	0.9272
2-lysolecithin pool	52	-7.5473	0.98801	1	14.694	0.022977	0.43013	17.809	0.53047	1	22	7.9223	0.66134	1	28	20.349	0.22478	0.9272
1-acyl-PE pool	50	-7.5421	0.98901	1	14.836	0.018981	0.42029	18.11	0.44755	0.93322	21	8.2546	0.62338	1	27	20.524	0.1988	0.9272
thiol	53	-7.5312	0.99101	1	16.504	0.016983	0.39486	28.12	0.006993	0.15485	25	13.199	0.24975	0.69404	28	26.216	0.015984	0.75487
ubiquitin C terminal thiolester	53	-7.5312	0.99101	1	16.504	0.016983	0.39486	28.12	0.006993	0.15485	25	13.199	0.24975	0.69404	28	26.216	0.015984	0.75487
1,2-diacylglycerol-LD-SM pool	26	-7.449	0.99001	1	20.259	0.001998	0.13272	12.858	0.47752	0.9571	15	-0.18308	0.999	1	11	19.982	0.025974	0.75487
O-1-alk-1-enyl-2-acyl-sn-glycero-3-phosphoethanolamine	46	-6.8964	0.99001	1	16.247	0.011988	0.3484	17.988	0.36863	0.88581	19	8.7202	0.51149	1	25	20.082	0.16683	0.9272
formaldehyde	25	-6.7869	0.97702	1	14.625	0.024975	0.43013	13.719	0.37762	0.88581	14	1.556	0.98002	1	11	18.927	0.038961	0.9272
1,2-diacylglycerol-LD-PE pool	32	-6.2475	0.97303	1	20.236	0.001998	0.13272	15.684	0.31668	0.82267	19	2.5392	0.97702	1	13	21.538	0.022977	0.75487
dolichyl-phosphate	21	-6.1341	0.95904	1	11.836	0.047952	0.66948	14.556	0.20979	0.65527	10	3.7193	0.78821	1	11	16.566	0.088911	0.9272
PE-LD pool	57	-5.9616	0.97802	1	17.949	0.005994	0.25338	21.175	0.28871	0.77777	26	10.959	0.47752	0.98688	29	22.359	0.12787	0.9272
1-(1-alkenyl)-sn-glycero-3-phosphoethanolamine	27	-5.635	0.95405	1	12.59	0.043956	0.63874	13.404	0.44855	0.93322	12	5.469	0.66334	1	14	15.745	0.17183	0.9272
inositol-1-phosphate	23	-5.2205	0.95205	1	13.393	0.023976	0.43013	14.635	0.24675	0.70393	9	6.2911	0.49051	1	14	13.715	0.31668	0.9272
1-organyl-2-lyso-sn-glycero-3-phosphocholine	31	-5.0499	0.95904	1	9.1394	0.1039	0.83152	11.534	0.73926	1	13	5.399	0.70629	1	17	12.845	0.54046	0.94835
TAG-LD pool	35	-4.8425	0.94505	1	16.508	0.00999	0.3484	14.598	0.48751	0.96435	19	4.2073	0.91708	1	15	19.683	0.055944	0.9272
lauric acid	51	-4.7951	0.95504	1	8.4901	0.16983	0.83152	10.437	0.97602	1	27	3.4144	0.996	1	23	13.554	0.66434	0.9873
chloride	40	-4.7783	0.95504	1	8.9095	0.11588	0.83152	12.423	0.81718	1	22	2.9943	0.98402	1	18	15.208	0.31968	0.9272
1,2-diacylglycerol-LD-TAG pool	56	-4.7402	0.96004	1	17.435	0.006993	0.27098	19.971	0.35764	0.88581	32	7.0583	0.90609	1	23	24.549	0.012987	0.75487
H2O2	100	-4.4065	0.96803	1	15.391	0.015984	0.39486	31.417	0.054945	0.43304	57	13.731	0.72727	1	43	32.102	0.011988	0.75487
fatty acid pool	77	-4.3338	0.95305	1	15.637	0.022977	0.43013	22.214	0.48352	0.96083	40	10.733	0.77023	1	35	24.251	0.12587	0.9272
PC-LD pool	63	-4.3256	0.95105	1	14.273	0.026973	0.4325	20.115	0.46154	0.94749	28	12.34	0.31369	0.78747	32	21.035	0.25075	0.9272
1-phosphatidyl-1D-myo-inositol-4-phosphate	62	-4.0052	0.94006	1	12.301	0.051948	0.69017	21.635	0.31069	0.81163	31	11.192	0.52547	1	31	19.404	0.34466	0.9272
PI pool	84	-3.9171	0.96903	1	14.003	0.030969	0.48002	24.284	0.34765	0.87383	43	12.852	0.58142	1	40	23.164	0.23676	0.9272
[protein]-L-lysine	208	-3.5366	0.97403	1	16.515	0.024975	0.43013	43.143	0.045954	0.40318	106	25.105	0.2048	0.62441	102	36.016	0.18781	0.9272
NAD+	294	-3.3294	0.97902	1	16.281	0.037962	0.56943	50.937	0.024975	0.32259	159	28.865	0.29271	0.7716	135	43.843	0.054945	0.9272
NADP+	275	-2.8861	0.96903	1	20.08	0.011988	0.3484	42.697	0.37463	0.88581	151	23.229	0.77722	1	122	39.747	0.19081	0.9272
NADPH	264	-2.7002	0.97203	1	18.637	0.013986	0.38256	40.994	0.43856	0.93322	143	22.87	0.74525	1	119	37.494	0.29471	0.9272
AMP	343	-2.2209	0.97303	1	22.305	0.003996	0.18581	59.64	0.000999	0.066362	187	33.975	0.078921	0.5226	156	51.236	0.006993	0.75487
PPi	395	0.36136	0.93606	1	16.243	0.048951	0.66948	64.511	0.000999	0.066362	211	39.962	0.004995	0.1742	184	51.727	0.02997	0.81977

## Sheet: U1_PMA_vs_U1_DMSO
Name	Genes (tot)	Stat (dist.dir.up)	p (dist.dir.up)	p adj (dist.dir.up)	Stat (dist.dir.dn)	p (dist.dir.dn)	p adj (dist.dir.dn)	Stat (non-dir.)	p (non-dir.)	p adj (non-dir.)	Genes (up)	Stat (mix.dir.up)	p (mix.dir.up)	p adj (mix.dir.up)	Genes (down)	Stat (mix.dir.dn)	p (mix.dir.dn)	p adj (mix.dir.dn)
cysteine	67	19.791	0.000999	0.046454	4.8109	0.5964	0.99499	54.938	0.000999	0.014077	36	44.991	0.000999	0.025808	31	32.281	0.001998	0.03441
histidine	51	21.397	0.000999	0.046454	-1.1724	0.86014	0.99499	46.965	0.000999	0.014077	32	39.45	0.000999	0.025808	19	25.749	0.004995	0.056651
leucine	59	21.093	0.000999	0.046454	1.0376	0.79321	0.99499	47.148	0.000999	0.014077	32	42.267	0.000999	0.025808	27	23.681	0.025974	0.18581
threonine	49	22.734	0.000999	0.046454	1.6939	0.73327	0.99499	54.866	0.000999	0.014077	28	46.271	0.000999	0.025808	21	30.38	0.000999	0.021115
tyrosine	55	20.553	0.000999	0.046454	5.1583	0.56244	0.99499	52.088	0.000999	0.014077	29	44.504	0.000999	0.025808	26	28.757	0.001998	0.03441
valine	44	19.998	0.000999	0.046454	2.3705	0.68731	0.99499	46.923	0.000999	0.014077	22	43.304	0.000999	0.025808	22	23.055	0.018981	0.14469
GM2A	22	32.027	0.000999	0.046454	-18.992	1	1	39.818	0.000999	0.014077	18	38.219	0.000999	0.025808	4	12.305	0.075924	0.44131
STAR	27	23.604	0.000999	0.046454	-9.6883	0.99301	1	37.927	0.000999	0.014077	18	34.804	0.000999	0.025808	9	16.471	0.041958	0.26366
apoA1	21	26.446	0.000999	0.046454	-8.8472	0.99301	1	41.082	0.000999	0.014077	15	38.306	0.000999	0.025808	6	16.291	0.032967	0.21591
sulfate	39	24.617	0.000999	0.046454	-10.681	0.999	1	32.936	0.00999	0.091085	21	38.342	0.000999	0.025808	18	7.0661	0.81319	1
proline	57	19.015	0.001998	0.066362	-0.67976	0.86114	0.99499	46.458	0.000999	0.014077	27	44.227	0.000999	0.025808	30	22.081	0.048951	0.3035
serine	71	18.207	0.001998	0.066362	3.2086	0.72627	0.99499	52.154	0.000999	0.014077	38	44.107	0.000999	0.025808	33	29.17	0.003996	0.054651
2-lysolecithin pool	52	16.453	0.001998	0.066362	-8.6246	0.996	1	23.682	0.41259	0.80273	30	26.195	0.15684	0.75971	20	9.7753	0.65435	1
PPARA	44	17.878	0.001998	0.066362	-8.8492	0.99201	1	34.3	0.002997	0.033181	26	32.684	0.004995	0.10099	18	14.345	0.22278	0.72766
arginine	49	15.671	0.003996	0.084461	1.2943	0.75325	0.99499	37.945	0.001998	0.02511	27	32.879	0.011988	0.20646	22	20.205	0.052947	0.32395
asparagine	53	17.736	0.003996	0.084461	4.872	0.54545	0.99499	48.769	0.000999	0.014077	28	40.639	0.001998	0.046454	25	28	0.005994	0.066362
isoleucine	45	18.488	0.002997	0.084461	5.5782	0.47453	0.99499	49.696	0.000999	0.014077	22	43.304	0.000999	0.025808	23	27.161	0.002997	0.046454
lysine	43	16.22	0.003996	0.084461	5.4934	0.48651	0.99499	47.205	0.000999	0.014077	23	39.772	0.000999	0.025808	20	26.565	0.000999	0.021115
methionine	58	16.139	0.003996	0.084461	5.4744	0.5045	0.99499	46.916	0.000999	0.014077	31	38.535	0.002997	0.063346	27	27.472	0.003996	0.054651
tryptophan	47	18.6	0.002997	0.084461	4.9489	0.55844	0.99499	47.414	0.000999	0.014077	23	42.953	0.000999	0.025808	24	24.303	0.00999	0.089334
GM2	20	17.395	0.003996	0.084461	-6.9115	0.97003	0.99793	24.754	0.021978	0.17033	10	29.354	0.000999	0.025808	10	5.6543	0.68432	1
O2	226	16.865	0.003996	0.084461	-4.9635	1	1	39.347	0.94805	1	114	39.803	0.66034	1	110	17.444	0.98701	1
1-acyl-PE pool	50	16.348	0.004995	0.096778	-8.3579	0.99001	1	23.837	0.35964	0.74992	29	26.064	0.15085	0.74622	19	10.234	0.53746	1
PS-LD pool	25	15.801	0.004995	0.096778	-7.6025	0.98601	1	27.669	0.011988	0.1072	16	26.155	0.026973	0.3689	9	11.242	0.21678	0.72521
phenylalanine	57	15.903	0.005994	0.11149	7.2108	0.42857	0.99499	46.261	0.000999	0.014077	28	39.879	0.001998	0.046454	29	25.671	0.00999	0.089334
(10Z)-heptadecenoic acid	32	11.764	0.023976	0.15703	-5.2977	0.94705	0.99499	20.509	0.24775	0.62273	17	21.797	0.13586	0.6867	15	6.7512	0.77123	1
(11Z,14Z)-eicosadienoic acid	32	11.764	0.023976	0.15703	-5.2977	0.94705	0.99499	20.509	0.24775	0.62273	17	21.797	0.13586	0.6867	15	6.7512	0.77123	1
(11Z,14Z,17Z)-eicosatrienoic acid	32	11.764	0.023976	0.15703	-5.2977	0.94705	0.99499	20.509	0.24775	0.62273	17	21.797	0.13586	0.6867	15	6.7512	0.77123	1
(13Z)-eicosenoic acid	32	11.764	0.023976	0.15703	-5.2977	0.94705	0.99499	20.509	0.24775	0.62273	17	21.797	0.13586	0.6867	15	6.7512	0.77123	1
(13Z)-octadecenoic acid	32	11.764	0.023976	0.15703	-5.2977	0.94705	0.99499	20.509	0.24775	0.62273	17	21.797	0.13586	0.6867	15	6.7512	0.77123	1
(13Z,16Z)-docosadienoic acid	32	11.764	0.023976	0.15703	-5.2977	0.94705	0.99499	20.509	0.24775	0.62273	17	21.797	0.13586	0.6867	15	6.7512	0.77123	1
(4Z,7Z,10Z,13Z,16Z)-DPA	32	11.764	0.023976	0.15703	-5.2977	0.94705	0.99499	20.509	0.24775	0.62273	17	21.797	0.13586	0.6867	15	6.7512	0.77123	1
(6Z,9Z)-octadecadienoic acid	32	11.764	0.023976	0.15703	-5.2977	0.94705	0.99499	20.509	0.24775	0.62273	17	21.797	0.13586	0.6867	15	6.7512	0.77123	1
(6Z,9Z,12Z,15Z,18Z)-TPA	32	11.764	0.023976	0.15703	-5.2977	0.94705	0.99499	20.509	0.24775	0.62273	17	21.797	0.13586	0.6867	15	6.7512	0.77123	1
(6Z,9Z,12Z,15Z,18Z,21Z)-THA	32	11.764	0.023976	0.15703	-5.2977	0.94705	0.99499	20.509	0.24775	0.62273	17	21.797	0.13586	0.6867	15	6.7512	0.77123	1
(7Z)-octadecenoic acid	32	11.764	0.023976	0.15703	-5.2977	0.94705	0.99499	20.509	0.24775	0.62273	17	21.797	0.13586	0.6867	15	6.7512	0.77123	1
(7Z)-tetradecenoic acid	32	11.764	0.023976	0.15703	-5.2977	0.94705	0.99499	20.509	0.24775	0.62273	17	21.797	0.13586	0.6867	15	6.7512	0.77123	1
(9E)-tetradecenoic acid	33	11.613	0.023976	0.15703	-5.2451	0.95904	0.99499	19.999	0.31568	0.68917	18	20.916	0.2028	0.81491	15	6.7512	0.77123	1
(9Z,12Z,15Z,18Z)-TTA	32	11.764	0.023976	0.15703	-5.2977	0.94705	0.99499	20.509	0.24775	0.62273	17	21.797	0.13586	0.6867	15	6.7512	0.77123	1
(9Z,12Z,15Z,18Z,21Z)-TPA	32	11.764	0.023976	0.15703	-5.2977	0.94705	0.99499	20.509	0.24775	0.62273	17	21.797	0.13586	0.6867	15	6.7512	0.77123	1
1,2-diacylglycerol-LD-TAG pool	56	12.907	0.014985	0.15703	-3.6466	0.95904	0.99499	26.675	0.22577	0.62273	31	25.968	0.21978	0.84149	25	11.007	0.63636	1
10,13,16,19-docosatetraenoic acid	32	11.764	0.023976	0.15703	-5.2977	0.94705	0.99499	20.509	0.24775	0.62273	17	21.797	0.13586	0.6867	15	6.7512	0.77123	1
10,13,16-docosatriynoic acid	32	11.764	0.023976	0.15703	-5.2977	0.94705	0.99499	20.509	0.24775	0.62273	17	21.797	0.13586	0.6867	15	6.7512	0.77123	1
12,15,18,21-tetracosatetraenoic acid	32	11.764	0.023976	0.15703	-5.2977	0.94705	0.99499	20.509	0.24775	0.62273	17	21.797	0.13586	0.6867	15	6.7512	0.77123	1
13,16,19-docosatrienoic acid	32	11.764	0.023976	0.15703	-5.2977	0.94705	0.99499	20.509	0.24775	0.62273	17	21.797	0.13586	0.6867	15	6.7512	0.77123	1
7-palmitoleic acid	32	11.764	0.023976	0.15703	-5.2977	0.94705	0.99499	20.509	0.24775	0.62273	17	21.797	0.13586	0.6867	15	6.7512	0.77123	1
8,11-eicosadienoic acid	32	11.764	0.023976	0.15703	-5.2977	0.94705	0.99499	20.509	0.24775	0.62273	17	21.797	0.13586	0.6867	15	6.7512	0.77123	1
9-eicosenoic acid	32	11.764	0.023976	0.15703	-5.2977	0.94705	0.99499	20.509	0.24775	0.62273	17	21.797	0.13586	0.6867	15	6.7512	0.77123	1
9-heptadecylenic acid	32	11.764	0.023976	0.15703	-5.2977	0.94705	0.99499	20.509	0.24775	0.62273	17	21.797	0.13586	0.6867	15	6.7512	0.77123	1
DHA	32	11.764	0.023976	0.15703	-5.2977	0.94705	0.99499	20.509	0.24775	0.62273	17	21.797	0.13586	0.6867	15	6.7512	0.77123	1
DPA	32	11.764	0.023976	0.15703	-5.2977	0.94705	0.99499	20.509	0.24775	0.62273	17	21.797	0.13586	0.6867	15	6.7512	0.77123	1
TAG-LD pool	35	12.389	0.021978	0.15703	-5.7655	0.96503	0.99499	17.496	0.55245	0.92573	18	20.821	0.20679	0.81491	17	3.6796	0.97003	1
adrenic acid	32	11.764	0.023976	0.15703	-5.2977	0.94705	0.99499	20.509	0.24775	0.62273	17	21.797	0.13586	0.6867	15	6.7512	0.77123	1
cerotic acid	32	11.764	0.023976	0.15703	-5.2977	0.94705	0.99499	20.509	0.24775	0.62273	17	21.797	0.13586	0.6867	15	6.7512	0.77123	1
cis-cetoleic acid	32	11.764	0.023976	0.15703	-5.2977	0.94705	0.99499	20.509	0.24775	0.62273	17	21.797	0.13586	0.6867	15	6.7512	0.77123	1
elaidate	32	11.764	0.023976	0.15703	-5.2977	0.94705	0.99499	20.509	0.24775	0.62273	17	21.797	0.13586	0.6867	15	6.7512	0.77123	1
gamma-linolenate	32	11.764	0.023976	0.15703	-5.2977	0.94705	0.99499	20.509	0.24775	0.62273	17	21.797	0.13586	0.6867	15	6.7512	0.77123	1
glycine	98	14.897	0.012987	0.15703	4.6238	0.7043	0.99499	47.673	0.001998	0.02511	51	39.189	0.011988	0.20646	47	28.017	0.025974	0.18581
henicosanoic acid	32	11.764	0.023976	0.15703	-5.2977	0.94705	0.99499	20.509	0.24775	0.62273	17	21.797	0.13586	0.6867	15	6.7512	0.77123	1
linolenate	32	11.764	0.023976	0.15703	-5.2977	0.94705	0.99499	20.509	0.24775	0.62273	17	21.797	0.13586	0.6867	15	6.7512	0.77123	1
mead acid	32	11.764	0.023976	0.15703	-5.2977	0.94705	0.99499	20.509	0.24775	0.62273	17	21.797	0.13586	0.6867	15	6.7512	0.77123	1
nonadecylic acid	32	11.764	0.023976	0.15703	-5.2977	0.94705	0.99499	20.509	0.24775	0.62273	17	21.797	0.13586	0.6867	15	6.7512	0.77123	1
oleate	33	11.613	0.023976	0.15703	-5.2451	0.95904	0.99499	19.999	0.31568	0.68917	18	20.916	0.2028	0.81491	15	6.7512	0.77123	1
omega-3-arachidonic acid	32	11.764	0.023976	0.15703	-5.2977	0.94705	0.99499	20.509	0.24775	0.62273	17	21.797	0.13586	0.6867	15	6.7512	0.77123	1
palmitolate	33	11.613	0.023976	0.15703	-5.2451	0.95904	0.99499	19.999	0.31568	0.68917	18	20.916	0.2028	0.81491	15	6.7512	0.77123	1
physeteric acid	32	11.764	0.023976	0.15703	-5.2977	0.94705	0.99499	20.509	0.24775	0.62273	17	21.797	0.13586	0.6867	15	6.7512	0.77123	1
stearate	34	11.25	0.022977	0.15703	-4.9767	0.95704	0.99499	19.81	0.34466	0.7318	18	20.916	0.2028	0.81491	16	6.6929	0.77223	1
tricosanoic acid	32	11.764	0.023976	0.15703	-5.2977	0.94705	0.99499	20.509	0.24775	0.62273	17	21.797	0.13586	0.6867	15	6.7512	0.77123	1
ximenic acid	32	11.764	0.023976	0.15703	-5.2977	0.94705	0.99499	20.509	0.24775	0.62273	17	21.797	0.13586	0.6867	15	6.7512	0.77123	1
dihomo-gamma-linolenate	36	13.354	0.01998	0.15703	-7.0102	0.97502	0.99865	21.338	0.28172	0.66497	21	22.232	0.19181	0.81491	15	6.7512	0.77123	1
fatty acid pool	77	13.942	0.013986	0.15703	-7.6342	0.997	1	21.018	0.90509	1	36	27.437	0.22078	0.84149	39	5.8016	0.995	1
eicosanoate	33	11.391	0.025974	0.16322	-5.0233	0.95504	0.99499	20.305	0.29371	0.66948	17	21.797	0.13586	0.6867	16	6.6929	0.77223	1
lignocerate	33	11.391	0.025974	0.16322	-5.0233	0.95504	0.99499	20.305	0.29371	0.66948	17	21.797	0.13586	0.6867	16	6.6929	0.77223	1
nicotinamide	27	12.245	0.025974	0.16322	1.9803	0.62438	0.99499	33.551	0.001998	0.02511	11	34.773	0.000999	0.025808	16	14.753	0.17882	0.70705
SM pool	24	11.972	0.026973	0.16723	-6.6404	0.96304	0.99499	20.744	0.12687	0.5315	15	19.745	0.2038	0.81491	9	8.3847	0.41459	1
EPA	36	11.856	0.027972	0.17114	-5.7591	0.95604	0.99499	19.742	0.38961	0.78341	21	20.142	0.3037	0.93522	15	6.7512	0.77123	1
margaric acid	34	10.487	0.031968	0.18817	-4.2139	0.93506	0.99499	20.635	0.29071	0.66921	18	20.916	0.2028	0.81491	16	7.8963	0.68432	1
pentadecylic acid	34	10.487	0.031968	0.18817	-4.2139	0.93506	0.99499	20.635	0.29071	0.66921	18	20.916	0.2028	0.81491	16	7.8963	0.68432	1
tridecylic acid	34	10.487	0.031968	0.18817	-4.2139	0.93506	0.99499	20.635	0.29071	0.66921	18	20.916	0.2028	0.81491	16	7.8963	0.68432	1
O-1-alk-1-enyl-2-acyl-sn-glycero-3-phosphoethanolamine	46	11.024	0.035964	0.2029	-4.3273	0.95804	0.99499	22.937	0.33467	0.71714	26	21.479	0.35265	0.95338	19	12.446	0.34366	0.9237
cholesterol	51	11.717	0.035964	0.2029	-1.6445	0.87712	0.99499	29.719	0.075924	0.44689	26	26.168	0.098901	0.6867	25	15.761	0.26973	0.804
cis-erucic acid	33	10.219	0.037962	0.2029	-3.8517	0.93606	0.99499	21.546	0.20879	0.62273	17	21.797	0.13586	0.6867	16	8.4761	0.63636	1
cis-gondoic acid	33	10.219	0.037962	0.2029	-3.8517	0.93606	0.99499	21.546	0.20879	0.62273	17	21.797	0.13586	0.6867	16	8.4761	0.63636	1
cis-vaccenic acid	33	10.219	0.037962	0.2029	-3.8517	0.93606	0.99499	21.546	0.20879	0.62273	17	21.797	0.13586	0.6867	16	8.4761	0.63636	1
nervonic acid	33	10.219	0.037962	0.2029	-3.8517	0.93606	0.99499	21.546	0.20879	0.62273	17	21.797	0.13586	0.6867	16	8.4761	0.63636	1
stearidonic acid	33	10.219	0.037962	0.2029	-3.8517	0.93606	0.99499	21.546	0.20879	0.62273	17	21.797	0.13586	0.6867	16	8.4761	0.63636	1
galactose	27	11.142	0.035964	0.2029	-7.1064	0.97403	0.99865	22.881	0.08991	0.49006	12	26.484	0.008991	0.16723	15	7.0101	0.74625	1
behenic acid	35	11.093	0.03996	0.21115	-4.9096	0.94705	0.99499	19.807	0.35265	0.7441	18	21.278	0.18282	0.81491	17	6.5256	0.82118	1
PC-LD pool	63	10.676	0.045954	0.23743	-0.39446	0.88811	0.99499	27.588	0.25375	0.62762	35	24.095	0.40859	1	27	16.288	0.25974	0.77922
linoleate	62	10.373	0.045954	0.23743	-5.5397	0.98402	1	16.727	0.95305	1	32	18.92	0.75724	1	30	4.5065	0.99301	1
decanoic acid	23	10.109	0.048951	0.25013	-4.563	0.92308	0.99499	14.485	0.48751	0.8719	12	16.569	0.25275	0.86318	11	3.6389	0.88511	1
myristic acid	36	10.105	0.053946	0.27266	-4.008	0.92308	0.99499	19.779	0.38861	0.78341	18	20.916	0.2028	0.81491	18	7.0552	0.81419	1
phosphatidylinositol-4,5-bisphosphate	45	9.9114	0.056943	0.28472	-3.9629	0.95005	0.99499	28.514	0.064935	0.40879	23	26.207	0.082917	0.6867	22	13.984	0.31868	0.86659
alanine	83	10.244	0.070929	0.35087	11.875	0.25974	0.99499	46.208	0.003996	0.04223	38	36.442	0.007992	0.15485	45	29.267	0.004995	0.056651
1-radyl-2-acyl-sn-glycero-3-phosphocholine	42	8.5913	0.087912	0.43031	-2.3513	0.89011	0.99499	19.529	0.53347	0.91199	23	17.863	0.57243	1	18	11.574	0.42657	1
activation-ppara	83	9.451	0.090909	0.44034	-0.94867	0.91309	0.99499	33.161	0.17183	0.61938	39	30.538	0.12288	0.6867	44	16.794	0.53447	1
PE-LD pool	57	9.0156	0.095904	0.45506	-2.8034	0.91708	0.99499	24.308	0.44655	0.82728	31	21.482	0.51948	1	25	14.424	0.35764	0.95577
palmitate	46	8.3241	0.095904	0.45506	-2.8712	0.93107	0.99499	19.974	0.58741	0.97536	22	21.067	0.27872	0.90633	23	9.3554	0.75125	1
11-carboxy-alpha-tocotrienol	28	7.1559	0.1049	0.46015	-0.79134	0.82318	0.99499	23.151	0.095904	0.49006	16	19.142	0.26174	0.86318	12	13.26	0.19181	0.70705
11-carboxy-gamma-tocotrienol	28	7.1559	0.1049	0.46015	-0.79134	0.82318	0.99499	23.151	0.095904	0.49006	16	19.142	0.26174	0.86318	12	13.26	0.19181	0.70705
5-carboxy-alpha-chromanol	28	7.1559	0.1049	0.46015	-0.79134	0.82318	0.99499	23.151	0.095904	0.49006	16	19.142	0.26174	0.86318	12	13.26	0.19181	0.70705
5-carboxy-gamma-chromanol	28	7.1559	0.1049	0.46015	-0.79134	0.82318	0.99499	23.151	0.095904	0.49006	16	19.142	0.26174	0.86318	12	13.26	0.19181	0.70705
7-carboxy-alpha-tocotrienol	28	7.1559	0.1049	0.46015	-0.79134	0.82318	0.99499	23.151	0.095904	0.49006	16	19.142	0.26174	0.86318	12	13.26	0.19181	0.70705
7-carboxy-gamma-tocotrienol	28	7.1559	0.1049	0.46015	-0.79134	0.82318	0.99499	23.151	0.095904	0.49006	16	19.142	0.26174	0.86318	12	13.26	0.19181	0.70705
9-carboxy-alpha-tocotrienol	28	7.1559	0.1049	0.46015	-0.79134	0.82318	0.99499	23.151	0.095904	0.49006	16	19.142	0.26174	0.86318	12	13.26	0.19181	0.70705
9-carboxy-gamma-tocotrienol	28	7.1559	0.1049	0.46015	-0.79134	0.82318	0.99499	23.151	0.095904	0.49006	16	19.142	0.26174	0.86318	12	13.26	0.19181	0.70705
ADP	442	12.083	0.10589	0.46019	21.823	0.25075	0.99499	92.853	0.000999	0.014077	216	67.98	0.013986	0.21678	225	64.082	0.000999	0.021115
K+	35	8.0324	0.11489	0.49464	-5.0826	0.95005	0.99499	17.468	0.55345	0.92573	15	20.482	0.17782	0.81491	20	5.3702	0.94006	1
(9Z,12Z,15Z,18Z)-tetracosatetraenoyl-CoA	33	7.0631	0.11788	0.50289	-2.8517	0.90509	0.99499	20.267	0.2987	0.671	17	18.587	0.3017	0.93522	16	9.9472	0.49451	1
butyryl-CoA	47	7.3483	0.13087	0.5246	2.0018	0.72228	0.99499	24.752	0.23976	0.62273	25	20.439	0.44256	1	22	14.39	0.2987	0.84179
heptylic acid	20	6.7485	0.12987	0.5246	-3.0154	0.86513	0.99499	11.371	0.6953	1	10	12.307	0.47453	1	10	3.7742	0.84615	1
hexanoic acid	20	6.7485	0.12987	0.5246	-3.0154	0.86513	0.99499	11.371	0.6953	1	10	12.307	0.47453	1	10	3.7742	0.84615	1
nonanoic acid	20	6.7485	0.12987	0.5246	-3.0154	0.86513	0.99499	11.371	0.6953	1	10	12.307	0.47453	1	10	3.7742	0.84615	1
octanoic acid	20	6.7485	0.12987	0.5246	-3.0154	0.86513	0.99499	11.371	0.6953	1	10	12.307	0.47453	1	10	3.7742	0.84615	1
undecylic acid	20	6.7485	0.12987	0.5246	-3.0154	0.86513	0.99499	11.371	0.6953	1	10	12.307	0.47453	1	10	3.7742	0.84615	1
valeric acid	20	6.7485	0.12987	0.5246	-3.0154	0.86513	0.99499	11.371	0.6953	1	10	12.307	0.47453	1	10	3.7742	0.84615	1
phosphatidate-LD-PE pool	24	7.3898	0.13586	0.5354	-3.6088	0.88811	0.99499	22.854	0.065934	0.40879	15	18.799	0.24675	0.86318	9	13.05	0.13087	0.63874
phosphatidate-LD-PS pool	24	7.3898	0.13586	0.5354	-3.6088	0.88811	0.99499	22.854	0.065934	0.40879	15	18.799	0.24675	0.86318	9	13.05	0.13087	0.63874
(6Z,9Z,12Z,15Z,18Z)-tetracosapentaenoyl-CoA	32	6.8961	0.13786	0.5387	-2.6195	0.87812	0.99499	21.066	0.21479	0.62273	17	18.587	0.3017	0.93522	15	10.981	0.42757	1
arachidonate	76	7.8928	0.14086	0.54583	-3.498	0.96304	0.99499	16.87	0.99001	1	37	18.557	0.87612	1	38	6.8788	0.98302	1
(4Z,7Z,10Z,13Z,16Z,19Z)-docosahexaenoyl-CoA	43	7.0807	0.15385	0.59123	-1.3991	0.85415	0.99499	22.385	0.32268	0.70114	24	19.239	0.51449	1	19	12.053	0.36663	0.96866
PAPS	57	7.249	0.15584	0.594	-4.1973	0.95205	0.99499	20.634	0.71928	1	23	23.231	0.1988	0.81491	34	7.6103	0.96803	1
FADH2	69	7.2976	0.16484	0.61813	-4.086	0.96004	0.99499	19.554	0.92907	1	37	19.405	0.82118	1	31	9.4479	0.87013	1
PI pool	84	7.5518	0.16384	0.61813	1.435	0.82318	0.99499	30.878	0.3017	0.67347	43	25.866	0.47253	1	41	17.709	0.37562	0.97838
glutamine	65	6.877	0.17283	0.63781	22.032	0.016983	0.20782	52.995	0.000999	0.014077	30	36.517	0.002997	0.063346	35	38.412	0.000999	0.021115
hexacosanoyl-CoA	34	6.113	0.17283	0.63781	-1.964	0.86214	0.99499	20.789	0.28172	0.66497	17	18.587	0.3017	0.93522	17	10.813	0.47552	1
lauric acid	51	6.8302	0.17582	0.64377	0.12123	0.8022	0.99499	19.204	0.71229	1	23	19.375	0.45554	1	28	8.3583	0.89111	1
H2O2	100	7.5711	0.17782	0.64599	-1.1789	0.94106	0.99499	28.493	0.68531	1	52	24.687	0.78422	1	48	15.431	0.6973	1
aspartate	50	6.7263	0.17982	0.64819	15.597	0.07992	0.66362	48.932	0.000999	0.014077	21	38.301	0.000999	0.025808	29	31.658	0.001998	0.03441
phosphatidate-LD-PC pool	25	5.5985	0.18781	0.67179	0.71879	0.69031	0.99499	25.319	0.026973	0.2023	15	18.799	0.24675	0.86318	10	17.008	0.033966	0.21936
5-tetradecenoyl-CoA	41	6.1018	0.2018	0.70554	-2.3236	0.89311	0.99499	20.791	0.42158	0.80672	21	18.464	0.42058	1	20	10.848	0.55145	1
7-hexadecenoyl-CoA	41	6.1018	0.2018	0.70554	-2.3236	0.89311	0.99499	20.791	0.42158	0.80672	21	18.464	0.42058	1	20	10.848	0.55145	1
retinol	50	6.3419	0.1988	0.70554	-4.1573	0.96004	0.99499	7.7968	0.999	1	21	13.388	0.84016	1	28	0.37586	1	1
(4Z,7Z,10Z,13Z,16Z)-docosapentaenoyl-CoA	44	6.0441	0.20779	0.72107	-0.42753	0.82717	0.99499	20.812	0.46154	0.84828	24	17.845	0.63936	1	20	11.32	0.51449	1
(9Z,12Z,15Z,18Z,21Z)-tetracosapentaenoyl-CoA	36	6.1491	0.21379	0.73096	0.16841	0.76424	0.99499	23.731	0.14585	0.57774	18	20.133	0.24476	0.86318	18	13.428	0.28771	0.82077
succinyl-CoA	23	5.2002	0.21379	0.73096	1.3457	0.65035	0.99499	24.235	0.040959	0.30232	11	20.809	0.054945	0.62316	12	13.628	0.17483	0.7069
1-organyl-2-lyso-sn-glycero-3-phosphocholine	31	5.2607	0.21678	0.7358	-1.9613	0.85015	0.99499	10.938	0.92507	1	16	11.058	0.82817	1	14	6.6487	0.74825	1
chloride	40	5.9241	0.21978	0.73662	-1.4902	0.85714	0.99499	16.871	0.72428	1	17	16.976	0.4046	1	23	7.6536	0.86913	1
ferricytochrome C	33	5.2034	0.22178	0.73662	-2.0619	0.87912	0.99499	11.63	0.8961	1	21	10.991	0.93606	1	11	7.4328	0.59041	1
ferrocytochrome C	33	5.2034	0.22178	0.73662	-2.0619	0.87912	0.99499	11.63	0.8961	1	21	10.991	0.93606	1	11	7.4328	0.59041	1
ubiquitin	230	8.2092	0.22677	0.74787	16.565	0.26673	0.99499	67.229	0.000999	0.014077	113	50.265	0.040959	0.51476	117	44.862	0.001998	0.03441
(6Z,9Z,12Z,15Z,18Z,21Z)-tetracosahexaenoyl-CoA	34	5.2545	0.22877	0.74915	1.2462	0.72328	0.99499	24.109	0.10889	0.51099	17	19.613	0.23676	0.86318	17	14.482	0.2038	0.70705
acyl-CoA pool	35	5.4714	0.23576	0.76665	0.4489	0.74925	0.99499	25.449	0.075924	0.44689	18	20.18	0.24176	0.86318	17	15.751	0.14486	0.65533
phosphatidate-LD-TAG pool	30	5.1792	0.23876	0.771	0.41056	0.73427	0.99499	24.101	0.062937	0.40879	17	18.734	0.29371	0.93522	13	15.189	0.1009	0.56528
1,2-diacylglycerol-LD-SM pool	26	4.9565	0.24076	0.77209	0.16592	0.71029	0.99499	13.246	0.7013	1	11	14.902	0.31069	0.94425	15	4.6777	0.90509	1
(10Z)-heptadecenoyl-CoA	28	1.4262	0.48352	0.77563	2.4012	0.61938	0.99499	16.576	0.48452	0.8719	12	13.261	0.49051	1	16	10.444	0.44755	1
(11Z)-docosenoyl-CoA	39	1.8582	0.5015	0.77563	3.4767	0.6034	0.99499	18.798	0.54945	0.9257	19	14.424	0.6973	1	20	12.191	0.43457	1
(11Z)-eicosenoyl-CoA	46	2.0865	0.46953	0.77563	3.2159	0.63836	0.99499	22.257	0.37662	0.77559	20	17.736	0.44456	1	26	14.05	0.42358	1
(13Z)-docosenoyl-CoA	43	1.7433	0.51848	0.77563	3.7409	0.5984	0.99499	21.504	0.37862	0.77559	18	17.246	0.42957	1	25	13.569	0.41159	1
(13Z)-eicosenoyl-CoA	45	3.6783	0.37662	0.77563	-0.26474	0.82617	0.99499	18.014	0.69431	1	22	15.248	0.72128	1	23	10.285	0.67133	1
(13Z)-octadecenoyl-CoA	39	1.6558	0.51349	0.77563	3.6791	0.58941	0.99499	19.116	0.51948	0.8981	19	14.424	0.6973	1	20	12.635	0.4046	1
(13Z,16Z)-docosadienoyl-CoA	39	1.8582	0.5015	0.77563	3.4767	0.6034	0.99499	18.798	0.54945	0.9257	19	14.424	0.6973	1	20	12.191	0.43457	1
(15Z)-tetracosenoyl-CoA	43	3.2428	0.3986	0.77563	2.4388	0.67233	0.99499	23.098	0.28372	0.6663	18	19.707	0.26973	0.88327	25	13.571	0.41159	1
(1R,2S)-naphthalene 1,2-oxide	28	2.396	0.3996	0.77563	-0.33927	0.7992	0.99499	6.5285	0.98801	1	13	7.6842	0.92707	1	14	4.0221	0.9041	1
(1S,2R)-naphthalene 1,2-oxide	28	2.396	0.3996	0.77563	-0.33927	0.7992	0.99499	6.5285	0.98801	1	13	7.6842	0.92707	1	14	4.0221	0.9041	1
(2E)-hexadecenoyl-CoA	29	4.5512	0.26673	0.77563	-2.725	0.87812	0.99499	17.071	0.43357	0.81294	15	15.266	0.46853	1	14	8.7674	0.58042	1
(5Z,8Z,11Z)-eicosatrienoyl-CoA	40	1.7852	0.51049	0.77563	5.6508	0.43457	0.99499	22.342	0.28771	0.66921	20	16.023	0.5954	1	20	15.574	0.1998	0.70705
(5Z,8Z,11Z,14Z,17Z)-eicosapentaenoyl-CoA	51	3.1886	0.4016	0.77563	5.7778	0.51548	0.99499	27.697	0.13686	0.5632	25	20.606	0.42458	1	26	18.585	0.13087	0.63874
(6Z,9Z,12Z,15Z)-octadecatetraenoyl-CoA	52	3.2643	0.38062	0.77563	5.6155	0.52647	0.99499	27.45	0.16583	0.60244	26	20.235	0.45854	1	26	18.585	0.13087	0.63874
(7Z)-tetradecenoyl-CoA	39	4.2457	0.30569	0.77563	-0.57897	0.81419	0.99499	19.352	0.49451	0.87432	19	16.597	0.50749	1	20	10.848	0.55145	1
(7Z,10Z,13Z,16Z)-docosatetraenoyl-CoA	48	3.8178	0.35265	0.77563	3.4453	0.62238	0.99499	24.802	0.24076	0.62273	24	19.239	0.51449	1	24	15.836	0.24975	0.76317
(7Z,10Z,13Z,16Z,19Z)-docosapentaenoyl-CoA	49	3.0556	0.42657	0.77563	4.133	0.58741	0.99499	24.649	0.26474	0.64451	23	19.373	0.45554	1	26	15.617	0.28671	0.82077
(8Z,11Z)-eicosadienoyl-CoA	42	1.2228	0.54146	0.77563	6.034	0.44356	0.99499	22.121	0.31568	0.68917	20	16.023	0.5954	1	22	15.287	0.23576	0.75607
(9E)-octadecenoyl-CoA	39	1.6558	0.51349	0.77563	3.6791	0.58941	0.99499	19.116	0.51948	0.8981	19	14.424	0.6973	1	20	12.635	0.4046	1
(9E)-tetradecenoyl-CoA	39	1.6558	0.51349	0.77563	3.6791	0.58941	0.99499	19.116	0.51948	0.8981	19	14.424	0.6973	1	20	12.635	0.4046	1
1,1-dichloroethylene epoxide	27	1.6262	0.48951	0.77563	0.4697	0.71129	0.99499	5.8791	0.995	1	12	6.8442	0.91608	1	14	4.0221	0.9041	1
1,2-diacylglycerol-LD-PC pool	30	4.3466	0.27872	0.77563	0.42212	0.73327	0.99499	14.805	0.67033	1	13	15.397	0.38861	1	17	6.2035	0.84815	1
1,2-diacylglycerol-LD-PE pool	32	4.3431	0.26174	0.77563	0.55086	0.73626	0.99499	15.249	0.68132	1	13	16.255	0.33367	0.95338	19	6.3441	0.87612	1
1,2-diacylglycerol-LD-PI pool	42	4.9698	0.27273	0.77563	1.3152	0.71229	0.99499	18.705	0.5994	0.97797	18	18.018	0.37762	0.99468	24	9.1403	0.81419	1
1,2-diacylglycerol-LD-PS pool	28	3.5749	0.3017	0.77563	1.3612	0.7003	0.99499	13.822	0.72128	1	11	14.902	0.31069	0.94425	17	5.7522	0.87313	1
1-(1-alkenyl)-sn-glycero-3-phosphoethanolamine	27	2.2476	0.44655	0.77563	0.46579	0.71129	0.99499	8.5582	0.95105	1	13	7.5063	0.93906	1	13	7.1043	0.66633	1
1-nitronaphthalene-5,6-oxide	28	2.396	0.3996	0.77563	-0.33927	0.7992	0.99499	6.5285	0.98801	1	13	7.6842	0.92707	1	14	4.0221	0.9041	1
1-nitronaphthalene-7,8-oxide	27	1.6262	0.48951	0.77563	0.4697	0.71129	0.99499	5.8791	0.995	1	12	6.8442	0.91608	1	14	4.0221	0.9041	1
1-phosphatidyl-1D-myo-inositol-4-phosphate	62	4.3993	0.34965	0.77563	4.0659	0.63137	0.99499	26.649	0.32767	0.70756	29	21.97	0.40759	1	33	15.933	0.41858	1
10,11-epoxy-(4Z,7Z)-hexadecadienoic acid	24	4.1315	0.30969	0.77563	2.2006	0.56843	0.99499	20.969	0.12088	0.51099	13	16.065	0.34765	0.95338	11	13.508	0.15784	0.65533
10,13,16-docosatrienoyl-CoA	40	2.953	0.41958	0.77563	2.3149	0.63736	0.99499	19.665	0.48951	0.87212	20	15.619	0.62937	1	20	12.191	0.43457	1
11,12,15-THETA	28	0.88397	0.52747	0.77563	-0.88397	0.82617	0.99499	1.1219	1	1	13	2.0526	1	1	15	-0.37802	0.999	1
11,12-EET	55	3.8954	0.33766	0.77563	0.32609	0.82418	0.99499	14.031	0.97303	1	27	13.341	0.93307	1	27	8.265	0.89211	1
11,14,15-THETA	28	0.88397	0.52747	0.77563	-0.88397	0.82617	0.99499	1.1219	1	1	13	2.0526	1	1	15	-0.37802	0.999	1
11-HETE	29	0.88397	0.54645	0.77563	-0.88397	0.79321	0.99499	-0.42208	1	1	13	2.0526	1	1	15	-0.37802	0.999	1
11-carboxy-alpha-chromanol	24	4.1315	0.30969	0.77563	2.2006	0.56843	0.99499	20.969	0.12088	0.51099	13	16.065	0.34765	0.95338	11	13.508	0.15784	0.65533
11-carboxy-gamma-chromanol	24	4.1315	0.30969	0.77563	2.2006	0.56843	0.99499	20.969	0.12088	0.51099	13	16.065	0.34765	0.95338	11	13.508	0.15784	0.65533
11h-14,15-EETA	28	0.88397	0.52747	0.77563	-0.88397	0.82617	0.99499	1.1219	1	1	13	2.0526	1	1	15	-0.37802	0.999	1
12(13)-EpOME	30	1.5308	0.48551	0.77563	-1.5308	0.83317	0.99499	1.7421	1	1	14	3.0461	0.999	1	16	-0.46381	0.998	1
12,13-epoxy-(6Z,9Z)-octadecadienoic acid	24	4.1315	0.30969	0.77563	2.2006	0.56843	0.99499	20.969	0.12088	0.51099	13	16.065	0.34765	0.95338	11	13.508	0.15784	0.65533
12,13-hydroxyoctadec-9(z)-enoate	20	0.24942	0.54945	0.77563	-0.24942	0.72228	0.99499	-4.5804	1	1	4	0.67059	0.96903	1	15	-3.5156	1	1
12,15,18,21-tetracosatetraenoyl-CoA	29	2.2206	0.43556	0.77563	1.5402	0.66833	0.99499	16.396	0.4965	0.87452	13	13.454	0.55145	1	16	9.9472	0.49451	1
12-oxo-c-LTB3	23	0.75481	0.53546	0.77563	1.4736	0.63936	0.99499	7.9362	0.94505	1	7	9.4016	0.55944	1	16	3.2966	0.96004	1
13,14-dihydro-15-oxo-lipoxin A4	27	3.3189	0.35165	0.77563	-0.706	0.78022	0.99499	8.1344	0.96004	1	12	9.1706	0.80819	1	15	2.7111	0.96903	1
13,16,19-docosatrienoyl-CoA	39	1.8582	0.5015	0.77563	3.4767	0.6034	0.99499	18.798	0.54945	0.9257	19	14.424	0.6973	1	20	12.191	0.43457	1
13-HETE	29	0.88397	0.54645	0.77563	-0.88397	0.79321	0.99499	-0.42208	1	1	13	2.0526	1	1	15	-0.37802	0.999	1
13-carboxy-alpha-tocotrienol	29	3.0195	0.37063	0.77563	2.741	0.5974	0.99499	19.595	0.25674	0.63079	15	14.739	0.5045	1	14	12.946	0.25175	0.76317
14,15-EET	55	3.8954	0.33766	0.77563	0.32609	0.82418	0.99499	14.031	0.97303	1	27	13.341	0.93307	1	27	8.265	0.89211	1
15(S)-HPETE	41	3.0178	0.40759	0.77563	-2.7865	0.9021	0.99499	5.2678	1	1	20	6.4803	0.995	1	21	1.0365	1	1
15-oxo-lipoxin A4	27	3.3189	0.35165	0.77563	-0.706	0.78022	0.99499	8.1344	0.96004	1	12	9.1706	0.80819	1	15	2.7111	0.96903	1
15H-11,12-EETA	28	0.88397	0.52747	0.77563	-0.88397	0.82617	0.99499	1.1219	1	1	13	2.0526	1	1	15	-0.37802	0.999	1
16(R)-HETE	28	0.88397	0.52747	0.77563	-0.88397	0.82617	0.99499	1.1219	1	1	13	2.0526	1	1	15	-0.37802	0.999	1
16alpha-hydroxyestrone	28	0.88397	0.52747	0.77563	-0.88397	0.82617	0.99499	1.1219	1	1	13	2.0526	1	1	15	-0.37802	0.999	1
17-HETE	29	0.88397	0.54645	0.77563	-0.88397	0.79321	0.99499	-0.42208	1	1	13	2.0526	1	1	15	-0.37802	0.999	1
18-HETE	29	0.88397	0.54645	0.77563	-0.88397	0.79321	0.99499	-0.42208	1	1	13	2.0526	1	1	15	-0.37802	0.999	1
18-hydroxy-all-trans-retinoate	28	0.88397	0.52747	0.77563	-0.88397	0.82617	0.99499	1.1219	1	1	13	2.0526	1	1	15	-0.37802	0.999	1
19(S)-HETE	28	0.88397	0.52747	0.77563	-0.88397	0.82617	0.99499	1.1219	1	1	13	2.0526	1	1	15	-0.37802	0.999	1
19-hydroxyandrostenedione	29	0.88397	0.54645	0.77563	-0.88397	0.79321	0.99499	-0.42208	1	1	13	2.0526	1	1	15	-0.37802	0.999	1
19-hydroxytestosterone	29	0.88397	0.54645	0.77563	-0.88397	0.79321	0.99499	-0.42208	1	1	13	2.0526	1	1	15	-0.37802	0.999	1
19-oxo-testosterone	29	0.88397	0.54645	0.77563	-0.88397	0.79321	0.99499	-0.42208	1	1	13	2.0526	1	1	15	-0.37802	0.999	1
19-oxoandrostenedione	29	0.88397	0.54645	0.77563	-0.88397	0.79321	0.99499	-0.42208	1	1	13	2.0526	1	1	15	-0.37802	0.999	1
1D-myo-inositol-1,4-bisphosphate	20	0.78635	0.4995	0.77563	2.4809	0.56943	0.99499	14.495	0.43057	0.81294	10	9.4886	0.70929	1	10	11.011	0.25275	0.76317
2,2-dichloroacetaldehyde	27	1.6262	0.48951	0.77563	0.4697	0.71129	0.99499	5.8791	0.995	1	12	6.8442	0.91608	1	14	4.0221	0.9041	1
3,3-diiodo-L-thyronine-4-O-sulfate	25	1.7448	0.44056	0.77563	-0.88473	0.78422	0.99499	9.8614	0.88811	1	9	10.852	0.54945	1	16	4.1875	0.92707	1
3-carboxy-alpha-chromanol	44	3.367	0.37762	0.77563	1.3637	0.75624	0.99499	12.456	0.96803	1	17	14.531	0.61139	1	26	6.0639	0.95804	1
3-hydroxykynurenine-O-beta-D-glucoside	20	1.6334	0.43257	0.77563	0.75631	0.65934	0.99499	8.261	0.91209	1	7	9.4016	0.55944	1	13	3.3476	0.91309	1
3-hydroxypropionyl-CoA	30	2.8811	0.38761	0.77563	-0.40226	0.77822	0.99499	9.7289	0.94206	1	14	9.6026	0.86214	1	16	4.3395	0.92108	1
3-oxopropionyl-CoA	26	3.433	0.35365	0.77563	-0.77032	0.75225	0.99499	8.4512	0.94505	1	12	9.1706	0.80819	1	14	3.0268	0.94505	1
3alpha,7alpha,12alpha,25-tetrahydroxy-5beta-cholestane-24-one	26	3.433	0.35365	0.77563	-0.77032	0.75225	0.99499	8.4512	0.94505	1	12	9.1706	0.80819	1	14	3.0268	0.94505	1
4-(methylnitrosamino)-1-(3-pyridyl)-1-butanol	27	3.3426	0.34965	0.77563	-1.913	0.83317	0.99499	-0.88453	1	1	7	7.0461	0.74426	1	19	-3.4479	1	1
4-(n-nitrosomethylamino)-1-(3-pyridyl)-1-butanone	24	3.7826	0.33367	0.77563	-2.2626	0.82917	0.99499	2.3794	0.998	1	12	5.4822	0.97203	1	11	0.26393	0.98801	1
4-androstene-3,17-dione	47	2.9866	0.41159	0.77563	-2.0339	0.88811	0.99499	7.2322	1	1	20	9.6472	0.95105	1	26	2.8726	0.998	1
4-oxo-9-cis-retinoate	45	2.6543	0.44456	0.77563	-0.60748	0.83816	0.99499	3.2031	1	1	16	7.8991	0.96304	1	28	-0.359	1	1
5,6-EET	31	1.5308	0.5035	0.77563	-1.5308	0.83317	0.99499	0.23933	1	1	14	3.0461	0.999	1	16	-0.46381	0.998	1
5,6-epoxy-(8Z)-tetradecenoic acid	24	4.1315	0.30969	0.77563	2.2006	0.56843	0.99499	20.969	0.12088	0.51099	13	16.065	0.34765	0.95338	11	13.508	0.15784	0.65533
5-S-glutathionyl-L-dopa	22	1.2077	0.50549	0.77563	1.0708	0.67233	0.99499	9.973	0.83417	1	8	10.092	0.58541	1	14	4.8732	0.86414	1
5-S-glutathionyl-dopamine	21	2.0996	0.41758	0.77563	0.23253	0.71728	0.99499	9.3811	0.85115	1	8	10.092	0.58541	1	13	4.0065	0.88511	1
5beta-cholestane-3alpha,7alpha,12alpha,24s,25-pentol	30	3.5405	0.33067	0.77563	-1.0617	0.81319	0.99499	8.6604	0.95804	1	15	8.8729	0.9011	1	15	3.3748	0.95704	1
6,7-dihydro-LTB4	29	0.88397	0.54645	0.77563	-0.88397	0.79321	0.99499	-0.42208	1	1	13	2.0526	1	1	15	-0.37802	0.999	1
6-hydroxymelatonin	29	1.6773	0.48352	0.77563	-0.8787	0.79321	0.99499	9.8706	0.92707	1	12	9.6335	0.77822	1	17	4.7982	0.92308	1
6-hydroxymelatonin-sulfate	25	2.2579	0.39361	0.77563	-1.3978	0.80919	0.99499	10.508	0.85514	1	10	10.969	0.58442	1	15	4.6097	0.90809	1
7,12-Dimethylbenz[A]Anthracene-3,4-Diol	28	1.7296	0.45155	0.77563	-1.7296	0.85614	0.99499	1.9233	1	1	13	3.4514	0.999	1	15	-0.58527	0.999	1
7,12-Dimethylbenz[A]Anthracene-3,4-Diol-1,2-Epoxide	26	1.0678	0.51848	0.77563	-1.0678	0.77223	0.99499	1.2889	1	1	12	2.4386	0.996	1	14	-0.50126	0.998	1
7,12-Dimethylbenz[A]Anthracene-3,4-Oxide	28	1.7296	0.45155	0.77563	-1.7296	0.85614	0.99499	1.9233	1	1	13	3.4514	0.999	1	15	-0.58527	0.999	1
7,12-dimethylbenz[a]anthracene	28	1.0837	0.50549	0.77563	-1.0837	0.83516	0.99499	-0.50731	1	1	13	2.0526	1	1	14	-0.50126	0.998	1
7,8-epoxy-(4Z,10Z)-hexadecadienoic acid	24	4.1315	0.30969	0.77563	2.2006	0.56843	0.99499	20.969	0.12088	0.51099	13	16.065	0.34765	0.95338	11	13.508	0.15784	0.65533
7-HETE	29	0.88397	0.54645	0.77563	-0.88397	0.79321	0.99499	-0.42208	1	1	13	2.0526	1	1	15	-0.37802	0.999	1
7-carboxy-alpha-chromanol	24	4.1315	0.30969	0.77563	2.2006	0.56843	0.99499	20.969	0.12088	0.51099	13	16.065	0.34765	0.95338	11	13.508	0.15784	0.65533
7-carboxy-gamma-chromanol	24	4.1315	0.30969	0.77563	2.2006	0.56843	0.99499	20.969	0.12088	0.51099	13	16.065	0.34765	0.95338	11	13.508	0.15784	0.65533
8,9-EET	31	1.5308	0.5035	0.77563	-1.5308	0.83317	0.99499	0.23933	1	1	14	3.0461	0.999	1	16	-0.46381	0.998	1
8,9-epoxy-(5Z)-tetradecenoic acid	24	4.1315	0.30969	0.77563	2.2006	0.56843	0.99499	20.969	0.12088	0.51099	13	16.065	0.34765	0.95338	11	13.508	0.15784	0.65533
8-HETE	29	0.88397	0.54645	0.77563	-0.88397	0.79321	0.99499	-0.42208	1	1	13	2.0526	1	1	15	-0.37802	0.999	1
9(10)-EpOME	30	1.5308	0.48551	0.77563	-1.5308	0.83317	0.99499	1.7421	1	1	14	3.0461	0.999	1	16	-0.46381	0.998	1
9,10-epoxy-(6Z,12Z)-octadecadienoic acid	24	4.1315	0.30969	0.77563	2.2006	0.56843	0.99499	20.969	0.12088	0.51099	13	16.065	0.34765	0.95338	11	13.508	0.15784	0.65533
9,10-hydroxyoctadec-12(Z)-enoate	20	0.24942	0.54945	0.77563	-0.24942	0.72228	0.99499	-4.5804	1	1	4	0.67059	0.96903	1	15	-3.5156	1	1
9-HETE	29	0.88397	0.54645	0.77563	-0.88397	0.79321	0.99499	-0.42208	1	1	13	2.0526	1	1	15	-0.37802	0.999	1
9-carboxy-alpha-chromanol	24	4.1315	0.30969	0.77563	2.2006	0.56843	0.99499	20.969	0.12088	0.51099	13	16.065	0.34765	0.95338	11	13.508	0.15784	0.65533
9-carboxy-gamma-chromanol	24	4.1315	0.30969	0.77563	2.2006	0.56843	0.99499	20.969	0.12088	0.51099	13	16.065	0.34765	0.95338	11	13.508	0.15784	0.65533
9-cis-4-oxo-13,14-dihydro-retinoate	26	3.433	0.35365	0.77563	-0.77032	0.75225	0.99499	8.4512	0.94505	1	12	9.1706	0.80819	1	14	3.0268	0.94505	1
9-deoxy-delta12-PGD2	20	1.6624	0.43257	0.77563	0.72729	0.65934	0.99499	8.1299	0.92108	1	7	9.4016	0.55944	1	13	3.1851	0.91908	1
9-heptadecenoyl-CoA	28	1.4262	0.48352	0.77563	2.4012	0.61938	0.99499	16.576	0.48452	0.8719	12	13.261	0.49051	1	16	10.444	0.44755	1
Benzo[A]Pyrene-2,3-Oxide	28	1.7296	0.45155	0.77563	-1.7296	0.85614	0.99499	1.9233	1	1	13	3.4514	0.999	1	15	-0.58527	0.999	1
D-myo-inositol-1,4,5-trisphosphate	24	3.3817	0.36563	0.77563	3.7071	0.48551	0.99499	22.368	0.075924	0.44689	12	16.489	0.25774	0.86318	12	15.145	0.11588	0.61762
Dibenzo[A,L]Pyrene	26	1.0678	0.51848	0.77563	-1.0678	0.77223	0.99499	1.2889	1	1	12	2.4386	0.996	1	14	-0.50126	0.998	1
Dibenzo[A,L]Pyrene-11,12-Diol	28	1.7296	0.45155	0.77563	-1.7296	0.85614	0.99499	1.9233	1	1	13	3.4514	0.999	1	15	-0.58527	0.999	1
Dibenzo[A,L]Pyrene-11,12-Diol-13,14-Epoxide	26	1.0678	0.51848	0.77563	-1.0678	0.77223	0.99499	1.2889	1	1	12	2.4386	0.996	1	14	-0.50126	0.998	1
Dibenzo[A,L]Pyrene-11,12-Epoxide	28	1.7296	0.45155	0.77563	-1.7296	0.85614	0.99499	1.9233	1	1	13	3.4514	0.999	1	15	-0.58527	0.999	1
FAD	85	2.5136	0.51049	0.77563	1.8014	0.82917	0.99499	23.208	0.88112	1	42	19.072	0.90909	1	42	15.211	0.62937	1
L-carnitine	33	1.2887	0.52048	0.77563	9.8792	0.22278	0.99499	23.768	0.11289	0.51099	14	16.929	0.3007	0.93522	19	16.791	0.11688	0.61762
L-dopachrome	22	1.0275	0.51449	0.77563	1.251	0.66034	0.99499	8.2152	0.92208	1	7	9.4016	0.55944	1	15	3.5266	0.95105	1
L-dopaquinone	20	1.6328	0.43357	0.77563	0.75688	0.65934	0.99499	8.2628	0.91209	1	7	9.4016	0.55944	1	13	3.3498	0.91309	1
LacCer pool	67	5.0958	0.2987	0.77563	6.4252	0.4965	0.99499	25.442	0.48751	0.8719	29	21.205	0.46953	1	38	15.258	0.53746	1
N-acetyl-LTE4	58	3.483	0.41758	0.77563	10.377	0.23477	0.99499	31.489	0.052947	0.35682	25	24.847	0.14486	0.72428	33	20.12	0.13187	0.63874
NADP+	275	7.5957	0.2977	0.77563	8.4467	0.7992	0.99499	50.904	0.56144	0.93573	117	42.423	0.5005	1	157	31.403	0.63836	1
NADPH	264	7.5783	0.26074	0.77563	7.3558	0.85714	0.99499	49.124	0.60739	0.98754	113	41.338	0.53247	1	150	29.961	0.67532	1
NH4+	49	2.0622	0.4965	0.77563	4.7024	0.54545	0.99499	24.4	0.28172	0.66497	17	20.448	0.2008	0.81491	32	15.289	0.44256	1
Na+	118	4.9967	0.36464	0.77563	8.8086	0.4975	0.99499	33.24	0.52647	0.90336	47	28.219	0.3976	1	71	19.893	0.66733	1
PAP	55	3.4307	0.37263	0.77563	0.35283	0.82318	0.99499	19.172	0.79321	1	21	19.572	0.35265	0.95338	34	9.0019	0.92607	1
S-(9-deoxy-delta12-PGD2)-glutathione	21	3.1024	0.34865	0.77563	-0.77032	0.77922	0.99499	9.3921	0.85115	1	8	11.157	0.49051	1	13	3.1851	0.91908	1
S-(9-deoxy-delta9,12-PGD2)-glutathione	21	3.1024	0.34865	0.77563	-0.77032	0.77922	0.99499	9.3921	0.85115	1	8	11.157	0.49051	1	13	3.1851	0.91908	1
S-(PGA1)-glutathione	20	1.6624	0.43257	0.77563	0.72729	0.65934	0.99499	8.1299	0.92108	1	7	9.4016	0.55944	1	13	3.1851	0.91908	1
S-(PGA2)-glutathione	20	1.6624	0.43257	0.77563	0.72729	0.65934	0.99499	8.1299	0.92108	1	7	9.4016	0.55944	1	13	3.1851	0.91908	1
S-(PGJ2)-glutathione	21	3.1024	0.34865	0.77563	-0.77032	0.77922	0.99499	9.3921	0.85115	1	8	11.157	0.49051	1	13	3.1851	0.91908	1
Tn-antigen	29	2.9603	0.37463	0.77563	0.65471	0.71928	0.99499	12.954	0.79021	1	10	14.694	0.3027	0.93522	19	5.3438	0.91708	1
UDP-N-acetyl-D-galactosamine	32	1.4028	0.4975	0.77563	2.2393	0.64336	0.99499	15.234	0.68132	1	9	17.038	0.15584	0.75971	23	7.3106	0.88412	1
[protein]-L-serine	28	1.405	0.48651	0.77563	2.2742	0.62138	0.99499	12.629	0.7972	1	10	12.524	0.45954	1	18	6.4158	0.86414	1
[protein]-N-ubiquityllysine	177	6.7245	0.28971	0.77563	14.464	0.28372	0.99499	58.317	0.000999	0.014077	92	41.291	0.24176	0.86318	85	41.196	0.000999	0.021115
adrenochrome	20	1.4179	0.45055	0.77563	0.97178	0.65035	0.99499	8.639	0.89411	1	7	9.4016	0.55944	1	13	3.8165	0.89411	1
aflatoxin B1-exo-8,9-epoxide	28	2.396	0.3996	0.77563	-0.33927	0.7992	0.99499	6.5285	0.98801	1	13	7.6842	0.92707	1	14	4.0221	0.9041	1
alpha-CEHC-glucuronide	20	0.42182	0.53447	0.77563	-0.42182	0.73227	0.99499	-4.495	1	1	4	0.99411	0.96204	1	15	-3.5841	1	1
alpha-hydroxyisocaproic acid	26	3.433	0.35365	0.77563	-0.77032	0.75225	0.99499	8.4512	0.94505	1	12	9.1706	0.80819	1	14	3.0268	0.94505	1
arachidonyl-CoA	65	5.3897	0.27273	0.77563	1.0505	0.82517	0.99499	27.963	0.28072	0.66497	33	22.187	0.52947	1	32	17.322	0.28472	0.82077
benzo[a]pyrene	28	1.0837	0.50549	0.77563	-1.0837	0.83516	0.99499	-0.50731	1	1	13	2.0526	1	1	14	-0.50126	0.998	1
benzo[a]pyrene-4,5-oxide	29	2.2676	0.43357	0.77563	-0.24797	0.76723	0.99499	6.3423	0.98901	1	13	7.6842	0.92707	1	15	3.7847	0.94505	1
benzo[a]pyrene-7,8-diol	28	2.396	0.3996	0.77563	-0.33927	0.7992	0.99499	6.5285	0.98801	1	13	7.6842	0.92707	1	14	4.0221	0.9041	1
bromobenzene-2,3-oxide	28	2.396	0.3996	0.77563	-0.33927	0.7992	0.99499	6.5285	0.98801	1	13	7.6842	0.92707	1	14	4.0221	0.9041	1
bromobenzene-3,4-oxide	28	2.396	0.3996	0.77563	-0.33927	0.7992	0.99499	6.5285	0.98801	1	13	7.6842	0.92707	1	14	4.0221	0.9041	1
butyrate	28	3.4344	0.3037	0.77563	-0.27938	0.7952	0.99499	11.497	0.86314	1	12	11.216	0.65734	1	16	5.4958	0.85814	1
cAMP	46	2.1777	0.46354	0.77563	1.2559	0.76523	0.99499	17.789	0.75924	1	20	15.375	0.65035	1	26	10.177	0.74226	1
cGMP	46	2.1777	0.46354	0.77563	1.2559	0.76523	0.99499	17.789	0.75924	1	20	15.375	0.65035	1	26	10.177	0.74226	1
ceramide pool	43	3.6214	0.36963	0.77563	2.4514	0.67233	0.99499	26.342	0.11389	0.51099	21	21.389	0.23477	0.86318	22	15.93	0.2008	0.70705
chloroacetyl chloride	27	1.6262	0.48951	0.77563	0.4697	0.71129	0.99499	5.8791	0.995	1	12	6.8442	0.91608	1	14	4.0221	0.9041	1
choline	23	2.739	0.37263	0.77563	4.1984	0.47053	0.99499	18.511	0.22777	0.62273	8	18.24	0.1009	0.6867	15	9.6015	0.54046	1
cis-vaccenoyl-CoA	46	1.9001	0.48951	0.77563	3.4022	0.62937	0.99499	22.55	0.35764	0.74912	20	17.736	0.44456	1	26	14.439	0.38561	0.99067
delta-12-prostaglandin J2	20	1.6624	0.43257	0.77563	0.72729	0.65934	0.99499	8.1299	0.92108	1	7	9.4016	0.55944	1	13	3.1851	0.91908	1
docosanoyl-CoA	50	2.358	0.46653	0.77563	4.7583	0.56044	0.99499	23.182	0.40559	0.79579	22	18.424	0.48152	1	28	14.647	0.4026	1
dopamine-O-quinone	27	0.82767	0.55045	0.77563	1.2291	0.67033	0.99499	10.029	0.92208	1	9	10.64	0.56743	1	18	4.7591	0.93706	1
dopaminochrome	26	0.80996	0.53946	0.77563	1.286	0.65035	0.99499	10.477	0.87612	1	9	10.64	0.56743	1	17	5.2149	0.90709	1
eicosanoyl-CoA	51	3.8323	0.35065	0.77563	1.3846	0.75325	0.99499	22.916	0.41459	0.80326	24	18.654	0.56444	1	27	13.907	0.45355	1
gamma-CEHC-glucuronide	20	0.42182	0.53447	0.77563	-0.42182	0.73227	0.99499	-4.495	1	1	4	0.99411	0.96204	1	15	-3.5841	1	1
gamma-carboxyethyl-hydroxychroman	44	3.367	0.37762	0.77563	1.3637	0.75624	0.99499	12.456	0.96803	1	17	14.531	0.61139	1	26	6.0639	0.95804	1
gamma-linolenoyl-CoA	48	3.3995	0.38262	0.77563	3.9572	0.58941	0.99499	26.455	0.15884	0.58158	23	20.139	0.3966	1	25	17.34	0.16783	0.68458
glucosylceramide pool	61	3.3169	0.43556	0.77563	6.8419	0.44456	0.99499	22.674	0.64136	1	26	18.526	0.59441	1	35	13.966	0.61139	1
hepoxilin A3	36	1.9316	0.47453	0.77563	-0.15036	0.78222	0.99499	10.06	0.96703	1	14	10.639	0.7952	1	22	4.3818	0.97602	1
hepoxilin A3-c	20	1.6624	0.43257	0.77563	0.72729	0.65934	0.99499	8.1299	0.92108	1	7	9.4016	0.55944	1	13	3.1851	0.91908	1
hexacosenoyl-CoA	30	1.974	0.45455	0.77563	2.2067	0.62338	0.99499	17.693	0.43157	0.81294	13	14.512	0.47453	1	17	10.813	0.47552	1
hexanoyl-CoA	27	3.1274	0.37063	0.77563	4.0883	0.5045	0.99499	19.21	0.25774	0.63079	14	14.41	0.48751	1	13	12.731	0.21179	0.71363
lauroyl-CoA	43	4.4825	0.3047	0.77563	1.1991	0.73526	0.99499	22.327	0.32867	0.70756	22	18.322	0.49151	1	21	13.196	0.37063	0.97369
leukotriene E4	62	5.5922	0.24975	0.77563	7.8263	0.38162	0.99499	32.589	0.065934	0.40879	28	26.754	0.12687	0.6867	34	19.728	0.16683	0.68458
linoleoyl-CoA	57	2.1288	0.50749	0.77563	4.4508	0.60939	0.99499	25.044	0.38262	0.78034	27	18.419	0.64635	1	30	17.046	0.24575	0.76295
myristoyl-CoA	47	3.2422	0.39461	0.77563	0.28664	0.81019	0.99499	22.185	0.43057	0.81294	22	18.325	0.49151	1	25	13.227	0.43756	1
noradrenochrome	20	1.4179	0.45055	0.77563	0.97178	0.65035	0.99499	8.639	0.89411	1	7	9.4016	0.55944	1	13	3.8165	0.89411	1
oleoyl-CoA	54	3.6254	0.36663	0.77563	3.3106	0.65235	0.99499	27.402	0.15884	0.58158	25	21.555	0.33866	0.95338	29	17.379	0.22378	0.72766
palmitoleoyl-CoA	45	3.8888	0.36563	0.77563	1.4722	0.74226	0.99499	21.321	0.44256	0.82646	21	17.601	0.5035	1	24	12.73	0.49051	1
palmitoyl-CoA	80	5.6239	0.25375	0.77563	-0.43659	0.90509	0.99499	28.628	0.43257	0.81294	39	24.064	0.53247	1	41	16.519	0.47552	1
pentadecanoyl-CoA	34	3.4382	0.33566	0.77563	0.03508	0.79121	0.99499	16.294	0.63337	1	18	13.058	0.76224	1	16	9.903	0.4955	1
phosphatidate-LD-PI pool	25	3.0082	0.34765	0.77563	-0.29719	0.75025	0.99499	19.372	0.21179	0.62273	14	14.715	0.46154	1	11	12.604	0.2028	0.70705
phosphatidate-LD-SM pool	20	4.2694	0.24675	0.77563	-1.2384	0.77822	0.99499	18.133	0.18981	0.62273	12	14.132	0.40959	1	8	11.363	0.2028	0.70705
phosphatidate-bile-PC pool	20	4.2694	0.24675	0.77563	-1.2384	0.77822	0.99499	18.133	0.18981	0.62273	12	14.132	0.40959	1	8	11.363	0.2028	0.70705
phosphatidylinositol-3,4,5-trisphosphate	47	4.2647	0.31469	0.77563	2.3305	0.7033	0.99499	24.575	0.24476	0.62273	24	19.901	0.46054	1	23	14.801	0.32168	0.86965
propanoyl-CoA	66	3.0554	0.43157	0.77563	7.4283	0.41958	0.99499	34.057	0.052947	0.35682	36	22.19	0.62837	1	30	26.208	0.010989	0.096413
prostaglandin J2	21	3.1024	0.34865	0.77563	-0.77032	0.77922	0.99499	9.3921	0.85115	1	8	11.157	0.49051	1	13	3.1851	0.91908	1
retinal	24	2.2872	0.45554	0.77563	-1.8323	0.8042	0.99499	5.6186	0.98701	1	13	5.5095	0.98701	1	11	2.3097	0.94306	1
retinyl-ester	28	4.2221	0.26274	0.77563	-1.7532	0.85814	0.99499	5.794	0.996	1	9	11.018	0.54545	1	19	-0.54959	0.999	1
stearoyl-CoA	55	2.7879	0.41658	0.77563	2.2357	0.73327	0.99499	23.096	0.48052	0.8719	25	18.441	0.5974	1	30	14.438	0.46254	1
sulfite	33	1.1242	0.53047	0.77563	1.8986	0.68432	0.99499	15.877	0.63237	1	14	12.889	0.60839	1	19	9.8607	0.56643	1
testosterone	47	1.9565	0.48352	0.77563	-1.0038	0.85614	0.99499	5.5111	1	1	18	8.3699	0.96603	1	28	1.9808	1	1
tetracosanoyl-CoA	45	4.3701	0.32368	0.77563	1.3259	0.74825	0.99499	24.027	0.25275	0.62762	19	21.267	0.17682	0.81491	26	13.43	0.47053	1
thiol	53	4.8123	0.29471	0.77563	8.0765	0.33966	0.99499	33.477	0.013986	0.12044	21	30.173	0.012987	0.20824	32	18.641	0.19481	0.70705
trichloroethene	27	1.6262	0.48951	0.77563	0.4697	0.71129	0.99499	5.8791	0.995	1	12	6.8442	0.91608	1	14	4.0221	0.9041	1
tricosanoyl-CoA	27	0.9882	0.53646	0.77563	2.9094	0.57443	0.99499	15.815	0.52148	0.8981	12	11.989	0.59441	1	15	10.494	0.45954	1
tridecanoyl-CoA	33	3.1948	0.36563	0.77563	0.33072	0.77622	0.99499	16.306	0.5954	0.97797	17	13.111	0.73227	1	16	9.903	0.4955	1
ubiquinol	76	2.7172	0.47552	0.77563	-0.9152	0.9001	0.99499	19.841	0.94006	1	44	14.885	0.99101	1	32	13.124	0.63437	1
ubiquinone	76	2.7172	0.47552	0.77563	-0.9152	0.9001	0.99499	19.841	0.94006	1	44	14.885	0.99101	1	32	13.124	0.63437	1
ubiquitin C terminal thiolester	53	4.8123	0.29471	0.77563	8.0765	0.33966	0.99499	33.477	0.013986	0.12044	21	30.173	0.012987	0.20824	32	18.641	0.19481	0.70705
prostaglandin A2	23	0.51135	0.55844	0.78452	1.7171	0.61938	0.99499	8.3298	0.93307	1	7	9.4016	0.55944	1	16	3.7685	0.94406	1
3,3-diiodo-L-thyronine	46	0.88	0.57043	0.79318	-0.23891	0.83317	0.99499	3.2709	1	1	13	8.0227	0.91009	1	32	0.25941	1	1
D-galactosyl-N-acylsphingosine	63	1.2744	0.56843	0.79318	11.584	0.22078	0.99499	26.065	0.37562	0.77559	27	17.355	0.73526	1	36	19.451	0.20679	0.70705
formaldehyde	25	0.3932	0.57143	0.79318	-0.3932	0.75824	0.99499	6.4296	0.98701	1	12	5.3947	0.97203	1	13	3.7331	0.9001	1
glycerol	28	0.33898	0.56743	0.79318	2.913	0.58442	0.99499	8.4587	0.96603	1	11	7.8012	0.89311	1	17	4.5805	0.93207	1
10-HETE	31	0.51942	0.57642	0.79773	-0.51942	0.77822	0.99499	-0.31606	1	1	13	2.0526	1	1	17	-0.23061	0.999	1
Pi	441	4.806	0.58442	0.79927	27.752	0.072927	0.61657	85.756	0.000999	0.014077	204	60.22	0.1998	0.81491	236	61.773	0.000999	0.021115
4-hydroxy-all-trans-retinoate	20	-0.14471	0.58442	0.79927	0.14471	0.6953	0.99499	-4.8109	1	1	4	-0.08573	0.98701	1	15	-3.3912	1	1
6,7-dihydro-5-oxo-12-epi-LTB4	38	0.89368	0.58342	0.79927	-0.86086	0.81718	0.99499	4.4561	1	1	17	5.5317	0.99301	1	20	2.878	0.99001	1
6,7-dihydro-5-oxo-LTB4	38	0.89368	0.58342	0.79927	-0.86086	0.81718	0.99499	4.4561	1	1	17	5.5317	0.99301	1	20	2.878	0.99001	1
prostaglandin A1	24	0.42371	0.59441	0.81055	1.7578	0.5994	0.99499	8.0436	0.95405	1	7	9.4016	0.55944	1	17	3.5243	0.97203	1
5-oxo-(6E)-12-epi-LTB4	32	0.15498	0.5974	0.81226	-0.15498	0.78222	0.99499	-0.10083	1	1	13	2.0526	1	1	18	0.05621	0.999	1
5-oxo-6-trans-LTB4	31	0.12357	0.6044	0.81937	-0.12357	0.76623	0.99499	0.085564	1	1	12	2.4386	0.996	1	18	0.05621	0.999	1
phosphatidylinositol-3,5-bisphosphate	39	0.49713	0.60939	0.82374	4.3369	0.55045	0.99499	18.304	0.5994	0.97797	20	12.786	0.83417	1	19	13.106	0.2987	0.84179
[protein]-L-lysine	208	2.4012	0.61439	0.82599	20.887	0.092907	0.74486	62.485	0.000999	0.014077	102	41.483	0.37862	0.99468	106	46.837	0.000999	0.021115
GSSG	22	-0.362	0.61638	0.82599	0.39406	0.7023	0.99499	14.428	0.50549	0.887	10	10.759	0.6014	1	12	9.7138	0.43057	1
estrone	44	0.4105	0.61538	0.82599	0.041635	0.81618	0.99499	4.2607	1	1	17	5.6978	0.99301	1	26	2.5454	0.999	1
GSH	80	1.0194	0.62038	0.82896	3.1135	0.74925	0.99499	20.45	0.95405	1	33	17.342	0.89011	1	47	12.148	0.8971	1
nonadecanoyl-CoA	42	0.20985	0.62238	0.82924	4.931	0.51149	0.99499	19.722	0.52048	0.8981	18	14.386	0.67433	1	24	13.631	0.41558	1
NH3	64	-0.013979	0.66334	0.82971	18.669	0.040959	0.39679	38.408	0.005994	0.059302	24	28.124	0.050949	0.6039	40	26.798	0.016983	0.13855
(11Z,14Z)-eicosadienoyl-CoA	46	-0.29821	0.66234	0.82971	7.1366	0.38561	0.99499	22.04	0.3976	0.78341	20	15.619	0.62937	1	26	15.617	0.28671	0.82077
(11Z,14Z,17Z)-eicosatrienoyl-CoA	46	-0.29821	0.66234	0.82971	7.1366	0.38561	0.99499	22.04	0.3976	0.78341	20	15.619	0.62937	1	26	15.617	0.28671	0.82077
(6Z,9Z)-octadecadienoyl-CoA	48	-0.0925	0.65734	0.82971	8.7662	0.29371	0.99499	25.221	0.22677	0.62273	22	17.05	0.58142	1	26	18.585	0.13087	0.63874
1-phosphatidyl-1D-myo-inositol-3,4-bisphosphate	41	-0.080294	0.63636	0.82971	7.2391	0.38661	0.99499	18.844	0.58941	0.97536	20	12.651	0.84416	1	21	13.983	0.3017	0.84436
1-phosphatidyl-1D-myo-inositol-5-phosphate	44	-0.11341	0.65834	0.82971	4.6645	0.54246	0.99499	18.336	0.67932	1	22	12.569	0.88212	1	22	13.362	0.37662	0.97838
10,13,16,19-docosatetraenoyl-CoA	46	-0.29821	0.66234	0.82971	7.1366	0.38561	0.99499	22.04	0.3976	0.78341	20	15.619	0.62937	1	26	15.617	0.28671	0.82077
12-keto-LTB4	31	-0.53305	0.65335	0.82971	2.4525	0.62637	0.99499	7.4222	0.99001	1	9	8.011	0.78322	1	22	3.6867	0.98501	1
2-hydroxyestradiol-17beta	36	-0.040747	0.62537	0.82971	0.040747	0.77023	0.99499	4.262	1	1	16	3.7455	0.997	1	20	2.368	0.99301	1
2-oxobutyrate	20	-1.0056	0.65235	0.82971	8.2797	0.23277	0.99499	20.347	0.1029	0.51099	8	13.552	0.31868	0.95338	12	15.203	0.11389	0.61762
3,5-diiodo-L-thyronine	23	-0.80866	0.65634	0.82971	0.80866	0.67632	0.99499	-5.8297	1	1	4	-1.8153	0.999	1	18	-3.7991	1	1
4-methyl-2-oxopentanoate	34	-0.025122	0.63437	0.82971	4.594	0.4975	0.99499	11.924	0.9001	1	13	9.7223	0.82617	1	21	7.5231	0.84116	1
9-eicosenoyl-CoA	46	-0.29821	0.66234	0.82971	7.1366	0.38561	0.99499	22.04	0.3976	0.78341	20	15.619	0.62937	1	26	15.617	0.28671	0.82077
CO2	124	1.1822	0.66234	0.82971	14.152	0.24076	0.99499	40.58	0.11389	0.51099	48	31.922	0.1988	0.81491	76	26.465	0.20579	0.70705
acetate	62	0.40922	0.64835	0.82971	6.1047	0.5025	0.99499	23.041	0.61838	1	27	15.837	0.83516	1	35	16.758	0.36264	0.96358
bilirubin-bisglucuronoside	22	-0.63398	0.64036	0.82971	0.63398	0.69331	0.99499	-3.013	1	1	5	1.0931	0.96903	1	16	-2.0917	1	1
decanoyl-CoA	24	-0.061618	0.62837	0.82971	6.1991	0.34366	0.99499	17.371	0.3027	0.67347	11	11.818	0.58242	1	13	12.731	0.21179	0.71363
digalactosylceramide	53	0.30246	0.66633	0.82971	8.8016	0.3047	0.99499	18.614	0.79421	1	22	12.997	0.86613	1	31	13.39	0.58941	1
fatty acid-ligands	26	-0.18435	0.63237	0.82971	0.31153	0.7043	0.99499	13.936	0.64535	1	12	10.048	0.74725	1	14	9.6889	0.5015	1
heneicosanoyl-CoA	39	-0.21769	0.66533	0.82971	5.5526	0.48352	0.99499	18.873	0.53546	0.91205	16	13.721	0.64935	1	23	13.133	0.43656	1
heptadecanoyl-CoA	42	0.014826	0.64036	0.82971	5.1261	0.4995	0.99499	20.028	0.49151	0.87233	18	14.386	0.67433	1	24	14.037	0.38362	0.99067
linolenoyl-CoA	48	-0.0925	0.65734	0.82971	8.7662	0.29371	0.99499	25.221	0.22677	0.62273	22	17.05	0.58142	1	26	18.585	0.13087	0.63874
sphinganine	22	-1.0453	0.66234	0.82971	6.7498	0.31169	0.99499	17.858	0.23976	0.62273	9	12.726	0.41159	1	13	12.643	0.21978	0.72766
trichloroethanol	37	-0.40305	0.66733	0.82971	0.40305	0.72927	0.99499	-6.0064	1	1	13	-1.551	1	1	22	-3.0966	1	1
triiodothyronine	31	-0.4229	0.64535	0.82971	0.4229	0.73826	0.99499	-2.0807	1	1	9	1.5617	0.99401	1	21	-1.7589	1	1
octanoyl-CoA	27	-0.73696	0.67233	0.83369	6.5234	0.36164	0.99499	17.56	0.37862	0.77559	13	11.067	0.74326	1	14	13.722	0.2038	0.70705
dihomo-gamma-linolenoyl-CoA	43	-0.50993	0.67433	0.83394	7.6818	0.35564	0.99499	22.138	0.34366	0.7318	18	15.322	0.59341	1	25	16.033	0.24376	0.76295
reverse triiodthyronine	27	-0.83169	0.67632	0.83419	0.83169	0.69431	0.99499	-5.0628	1	1	5	-0.83928	0.999	1	21	-3.5397	1	1
(7Z)-octadecenoyl-CoA	37	-0.66499	0.68332	0.83616	8.2571	0.28871	0.99499	20.012	0.40859	0.7983	16	13.611	0.65934	1	21	14.683	0.24476	0.76295
13-cis-retinoate	21	-0.92894	0.68232	0.83616	0.92894	0.66633	0.99499	-3.4267	1	1	5	0.21172	0.98501	1	15	-2.0571	1	1
9-cis-retinoate	21	-0.92894	0.68232	0.83616	0.92894	0.66633	0.99499	-3.4267	1	1	5	0.21172	0.98501	1	15	-2.0571	1	1
(8Z,11Z,14Z,17Z)-eicosatetraenoyl-CoA	50	-0.56666	0.69131	0.84296	9.0651	0.30969	0.99499	25.002	0.27373	0.66293	22	17.05	0.58142	1	28	18.297	0.15485	0.65533
fructose-6-phosphate	26	-1.0196	0.69431	0.84296	8.8083	0.22178	0.99499	17.006	0.39161	0.78341	13	9.5834	0.83417	1	13	14.467	0.13686	0.65533
sphingosine	26	-1.0143	0.69431	0.84296	3.6995	0.4995	0.99499	17.138	0.38462	0.78099	10	13.623	0.36663	0.98546	16	11.076	0.40659	1
bilirubin	23	-1.3952	0.7033	0.84944	1.3952	0.64635	0.99499	-3.0223	1	1	5	0.29301	0.98202	1	17	-1.6832	1	1
dopamine	36	-1.0447	0.7023	0.84944	1.0447	0.70929	0.99499	7.4392	0.99301	1	13	6.8742	0.96304	1	23	4.1391	0.97303	1
CoA	250	1.4461	0.72827	0.87506	20.097	0.13287	0.98069	62.444	0.003996	0.04223	115	43.898	0.34965	0.95338	135	44.46	0.000999	0.021115
UDP-glucuronate	36	-1.4283	0.72827	0.87506	1.4283	0.68631	0.99499	2.4926	1	1	9	5.2061	0.92907	1	26	1.4801	1	1
1-phosphatidyl-1D-myo-inositol-3-phosphate	43	-1.1808	0.73327	0.87653	7.7767	0.34765	0.99499	20.733	0.44655	0.82728	19	14.288	0.70829	1	24	15.039	0.30769	0.84436
UDP-galactose	68	-0.9327	0.73327	0.87653	10.692	0.31169	0.99499	21.71	0.78122	1	27	14.767	0.88911	1	41	15.976	0.52448	1
O2-	23	-1.9478	0.74026	0.88262	5.0408	0.40959	0.99499	10.193	0.83017	1	12	6.0202	0.95205	1	10	11.46	0.22577	0.72906
adenosine	30	-2.1191	0.76224	0.9065	21.815	0.007992	0.12815	36.732	0.000999	0.014077	10	24.132	0.015984	0.23976	20	27.924	0.000999	0.021115
inositol-1-phosphate	23	-2.4563	0.77622	0.92078	8.227	0.22977	0.99499	17.345	0.2977	0.671	8	11.129	0.49351	1	15	13.351	0.24176	0.76295
retinoate	40	-1.958	0.78422	0.92789	1.958	0.66134	0.99499	3.2749	1	1	16	1.9955	0.999	1	24	2.5986	0.995	1
uridine	23	-2.7531	0.79221	0.93259	16.436	0.026973	0.28506	24.132	0.043956	0.31445	9	13.243	0.37163	0.99278	14	20.313	0.021978	0.16222
acetyl-CoA	162	-0.55409	0.79421	0.93259	20.875	0.062937	0.5628	53.469	0.005994	0.059302	76	34.879	0.44955	1	86	40.597	0.000999	0.021115
thyroxine	27	-2.5558	0.79321	0.93259	2.5558	0.59341	0.99499	-2.9433	1	1	5	-0.83928	0.999	1	21	-1.1364	1	1
IMP	31	-2.5126	0.7972	0.93375	18.561	0.016983	0.20782	30.878	0.006993	0.066362	10	22.314	0.033966	0.45126	21	22.118	0.015984	0.13514
CMP	55	-2.8075	0.80519	0.93838	21.716	0.017982	0.2144	39.664	0.002997	0.033181	19	27.18	0.026973	0.3689	36	29.281	0.002997	0.046454
estradiol-17beta 3-glucuronide	24	-2.7159	0.8042	0.93838	5.4399	0.39361	0.99499	-1.9246	1	1	4	-0.45081	0.99301	1	19	-0.072826	0.999	1
estradiol-17beta	54	-2.4244	0.81618	0.94881	2.4244	0.6993	0.99499	-1.2503	1	1	16	1.1863	0.999	1	36	0.41438	1	1
glutamate	108	-1.6945	0.82418	0.9519	27.453	0.002997	0.073348	53.981	0.000999	0.014077	41	35.078	0.024975	0.36292	67	41.095	0.000999	0.021115
thymidine	20	-3.4692	0.83217	0.9519	19.531	0.010989	0.15485	29.299	0.002997	0.033181	6	19.062	0.048951	0.59901	14	22.54	0.006993	0.072261
cytidine	27	-3.2709	0.82917	0.9519	16.943	0.042957	0.3995	26.491	0.022977	0.17515	9	16.488	0.18581	0.81491	18	20.786	0.018981	0.14469
ITP	22	-3.5136	0.83117	0.9519	11.405	0.13586	0.98714	18.465	0.1968	0.62273	9	8.9668	0.71728	1	13	16.56	0.061938	0.36925
dolichyl-phosphate	21	-3.4261	0.82617	0.9519	6.2769	0.33167	0.99499	10.172	0.81319	1	8	4.9874	0.91608	1	13	9.016	0.5045	1
formate	51	-2.789	0.83317	0.9519	10.507	0.25574	0.99499	14.623	0.95005	1	21	7.8487	0.99401	1	29	14.237	0.45654	1
glucose	65	-2.1233	0.82917	0.9519	8.9915	0.35564	0.99499	23.901	0.5974	0.97797	22	18.571	0.46653	1	43	16.102	0.56344	1
(2E)-octadecenoyl-CoA	28	-3.2883	0.83816	0.95526	6.2572	0.41159	0.99499	14.056	0.7033	1	13	7.4172	0.94306	1	15	12.299	0.30869	0.84436
GMP	57	-2.4876	0.84316	0.9586	15.471	0.065934	0.57848	28.48	0.15584	0.58158	22	19.429	0.4006	1	35	20.94	0.12587	0.63874
deoxyadenosine	20	-3.8742	0.85914	0.97439	18.8	0.013986	0.19128	29.321	0.002997	0.033181	6	18.447	0.058941	0.65256	14	22.969	0.006993	0.072261
IDP	26	-4.0573	0.87213	0.98671	11.316	0.13087	0.98069	18.332	0.2967	0.671	10	9.0513	0.74925	1	16	16.213	0.10789	0.59726
pyruvate	51	-3.4828	0.87712	0.98756	17.761	0.038961	0.38547	29.277	0.087912	0.49006	23	15.674	0.74126	1	28	25.306	0.007992	0.074326
malonyl-CoA	20	-4.2289	0.87612	0.98756	12.115	0.11089	0.85939	21.917	0.057942	0.3849	6	14.568	0.16384	0.77739	14	16.658	0.077922	0.44733
fructose	27	-4.5689	0.88112	0.98937	12.111	0.11988	0.91384	16.994	0.41758	0.80571	9	9.223	0.69231	1	18	14.291	0.22378	0.72766
1-phosphatidyl-myo-inositol-3,5-bisphosphate	29	-4.3092	0.88511	0.98937	9.1607	0.22478	0.99499	12.364	0.83317	1	12	6.1383	0.94705	1	17	10.991	0.46254	1
L-lactate	27	-4.7643	0.88511	0.98937	10.59	0.17183	0.99499	14.029	0.67832	1	8	8.3261	0.72428	1	19	11.321	0.43457	1
NAD+	294	-0.71318	0.8981	0.99908	22.059	0.10789	0.85034	61.888	0.043956	0.31445	127	42.044	0.69131	1	167	45.45	0.006993	0.072261
UDP-N-acetylglucosamine	51	-4.1159	0.8971	0.99908	7.7744	0.3996	0.99499	15.753	0.91409	1	18	10.246	0.90709	1	33	12.016	0.70829	1
AMP	343	-4.9269	0.98102	1	45.496	0.000999	0.038711	92.133	0.000999	0.014077	152	54.682	0.1039	0.6867	191	74.685	0.000999	0.021115
DNA	34	-20.438	1	1	54.918	0.000999	0.038711	46.264	0.000999	0.014077	8	12.796	0.37363	0.99278	26	45.807	0.000999	0.021115
PPi	395	-13.645	1	1	60.037	0.000999	0.038711	100.06	0.000999	0.014077	166	52.757	0.34066	0.95338	229	86.496	0.000999	0.021115
RNA	74	-24.229	1	1	45.49	0.000999	0.038711	40.09	0.016983	0.13855	19	9.908	0.94605	1	55	40.679	0.000999	0.021115
SAH	147	-19.65	1	1	33.798	0.000999	0.038711	42.198	0.15185	0.58158	42	16.913	0.96603	1	105	39.233	0.004995	0.056651
UTP	94	-20.331	1	1	41.666	0.000999	0.038711	42.549	0.005994	0.059302	30	13.692	0.96204	1	64	42.192	0.000999	0.021115
dATP	47	-19.94	1	1	48.786	0.000999	0.038711	46.127	0.000999	0.014077	14	11.799	0.6983	1	33	47.364	0.000999	0.021115
dCMP	22	-10.964	0.99301	1	27.812	0.000999	0.038711	25.665	0.016983	0.13855	3	15.571	0.051948	0.6039	19	21.429	0.021978	0.16222
dCTP	40	-20.783	1	1	49.986	0.000999	0.038711	43.327	0.000999	0.014077	10	10.003	0.66733	1	30	44.255	0.000999	0.021115
dGTP	44	-19.476	1	1	49.29	0.000999	0.038711	44.988	0.000999	0.014077	14	10.717	0.79321	1	30	47.162	0.000999	0.021115
dTMP	23	-9.1764	0.99001	1	29.937	0.000999	0.038711	28.756	0.006993	0.066362	6	13.378	0.22577	0.85354	17	25.5	0.002997	0.046454
dTTP	39	-15.084	1	1	42.219	0.000999	0.038711	41.989	0.000999	0.014077	13	13.529	0.54645	1	26	41.86	0.000999	0.021115
AKG	62	-10.711	0.999	1	28.499	0.001998	0.061938	35.955	0.016983	0.13855	19	17.131	0.47253	1	43	31.786	0.004995	0.056651
CTP	69	-10.759	0.997	1	26.908	0.001998	0.061938	36.227	0.021978	0.17033	24	16.512	0.71928	1	45	32.801	0.000999	0.021115
SAM	150	-19.456	1	1	32.395	0.001998	0.061938	41.86	0.18482	0.62273	43	17.315	0.97502	1	107	38.587	0.007992	0.074326
(R)-1,2-dimethyl-5,6-dihydroxy-tetrahydroisoquinoline	76	-16.169	1	1	24.642	0.002997	0.073348	31.937	0.14785	0.57774	18	14.119	0.69331	1	58	28.693	0.032967	0.21591
beta-carboline	76	-16.169	1	1	24.642	0.002997	0.073348	31.937	0.14785	0.57774	18	14.119	0.69331	1	58	28.693	0.032967	0.21591
harman	76	-16.169	1	1	24.642	0.002997	0.073348	31.937	0.14785	0.57774	18	14.119	0.69331	1	58	28.693	0.032967	0.21591
5,10-methylene-THF	25	-10.227	0.98701	1	25.904	0.003996	0.080789	28.517	0.008991	0.083616	11	6.3516	0.95005	1	14	32.477	0.000999	0.021115
GDP	117	-12.289	0.999	1	28.762	0.003996	0.080789	40.695	0.080919	0.47034	43	18.487	0.95005	1	74	37.078	0.003996	0.054651
THF	24	-9.3114	0.98302	1	26.305	0.003996	0.080789	32.042	0.002997	0.033181	6	13.719	0.20879	0.81586	18	29.078	0.001998	0.03441
dAMP	32	-8.1846	0.97902	1	24.464	0.003996	0.080789	29.147	0.01998	0.16018	10	14.676	0.3027	0.93522	22	25.258	0.004995	0.056651
salsolinol	79	-16.381	1	1	24.691	0.004995	0.096778	31.971	0.15285	0.58158	19	13.865	0.73427	1	60	28.883	0.041958	0.26366
inosine	20	-5.9967	0.94505	1	21.882	0.005994	0.11149	29.689	0.001998	0.02511	5	18.499	0.036963	0.47744	15	23.602	0.004995	0.056651
CDP	61	-10.397	0.999	1	25.171	0.007992	0.12815	31.824	0.071928	0.44009	21	13.672	0.82318	1	40	29.393	0.004995	0.056651
[protein]-N6,N6-dimethyl-L-lysine	27	-11.006	0.99401	1	21.392	0.007992	0.12815	21.396	0.15385	0.58158	8	5.0686	0.91309	1	19	22.217	0.018981	0.14469
histone-N6-methyl-L-lysine	27	-11.006	0.99401	1	21.392	0.007992	0.12815	21.396	0.15385	0.58158	8	5.0686	0.91309	1	19	22.217	0.018981	0.14469
UMP	41	-7.5797	0.97403	1	21.696	0.00999	0.15485	25.01	0.14685	0.57774	12	13.398	0.47952	1	29	21.12	0.070929	0.41749
dGMP	20	-5.0211	0.90609	1	19.77	0.010989	0.15485	22.219	0.051948	0.35682	6	13.791	0.20579	0.81491	14	17.529	0.056943	0.34388
histone-L-lysine	45	-9.6613	0.99401	1	19.654	0.010989	0.15485	25.736	0.15884	0.58158	18	9.4257	0.93506	1	27	25.53	0.007992	0.074326
D-lactate	20	-9.7953	0.998	1	18.559	0.014985	0.19909	15.516	0.35365	0.7441	7	0.86632	0.99201	1	13	18.61	0.028971	0.20411
GTP	122	-10.589	0.995	1	24.108	0.015984	0.20646	37.173	0.27772	0.66497	45	18.613	0.97502	1	77	32.562	0.02997	0.208
[protein]-N6,N6,N6-trimethyl-L-lysine	32	-7.8825	0.97802	1	17.423	0.022977	0.26059	22.78	0.12987	0.53919	12	8.4076	0.84416	1	20	22.302	0.016983	0.13855
[protein]-N6-methyl-L-lysine	25	-10.11	0.98701	1	20.904	0.022977	0.26059	21.133	0.11588	0.51099	8	5.0686	0.91309	1	17	22.151	0.007992	0.074326
dGDP	20	-7.7977	0.98302	1	16.561	0.025974	0.28088	19.987	0.11089	0.51099	7	6.7743	0.78022	1	13	19.82	0.015984	0.13514
nicotinate ribonucleotide	21	-6.7213	0.95005	1	17.52	0.025974	0.28088	19.865	0.14486	0.57774	4	13.562	0.16384	0.77739	17	15.5	0.15385	0.65533
dADP	36	-8.3198	0.98501	1	17.03	0.032967	0.34066	26.365	0.051948	0.35682	14	10.378	0.81319	1	22	25.447	0.003996	0.054651
D-lactaldehyde	21	-7.3957	0.96803	1	15.948	0.034965	0.35345	11.482	0.71828	1	7	0.12446	0.998	1	14	13.975	0.18981	0.70705
HCO3-	52	-6.0624	0.95405	1	17.614	0.042957	0.3995	23.108	0.44955	0.82953	19	11.137	0.90709	1	33	20.557	0.11588	0.61762
succinate	31	-5.7955	0.94306	1	15.181	0.051948	0.47364	24.198	0.08991	0.49006	9	15.965	0.21479	0.83229	22	18.513	0.092907	0.52685
NADH	256	-5.681	0.98601	1	22.477	0.072927	0.61657	52.903	0.25375	0.62762	111	31.59	0.98501	1	145	42.654	0.007992	0.074326
UDP	222	-4.3768	0.97303	1	20.543	0.090909	0.74163	37.987	0.96004	1	82	25.9	0.97802	1	139	28.811	0.68232	1
N-acetyl-S-[2-carboxy-1-(1H-imidazol-4-yl)ethyl]-L-cysteine	21	-5.764	0.93307	1	8.6148	0.22577	0.99499	14.387	0.48651	0.8719	6	7.3146	0.65435	1	15	12.397	0.30669	0.84436
S-[2-carboxy-1-(1H-imidazol-4-yl)ethyl]-L-cysteine	21	-5.764	0.93307	1	8.6148	0.22577	0.99499	14.387	0.48651	0.8719	6	7.3146	0.65435	1	15	12.397	0.30669	0.84436
acetaldehyde	23	-5.8573	0.93307	1	8.5813	0.21279	0.99499	6.3138	0.97602	1	7	0.016211	0.998	1	16	7.5592	0.71329	1
peptidylproline-(omega=0)	35	-6.2485	0.95005	1	8.6774	0.26474	0.99499	15.042	0.74026	1	13	8.3401	0.8981	1	21	14.648	0.24775	0.76295
peptidylproline-(omega=180)	35	-6.2485	0.95005	1	8.6774	0.26474	0.99499	15.042	0.74026	1	13	8.3401	0.8981	1	21	14.648	0.24775	0.76295

## Sheet: U937_PMA_vs_U937_DMSO
Name	Genes (tot)	Stat (dist.dir.up)	p (dist.dir.up)	p adj (dist.dir.up)	Stat (dist.dir.dn)	p (dist.dir.dn)	p adj (dist.dir.dn)	Stat (non-dir.)	p (non-dir.)	p adj (non-dir.)	Genes (up)	Stat (mix.dir.up)	p (mix.dir.up)	p adj (mix.dir.up)	Genes (down)	Stat (mix.dir.dn)	p (mix.dir.dn)	p adj (mix.dir.dn)
GM2A	22	11.07	0.001998	0.46454	-9.8242	0.999	0.999	13.713	0.000999	0.027326	17	13.715	0.005994	0.28388	5	3.4738	0.4036	0.70554
apoA1	21	10.112	0.001998	0.46454	-8.8374	0.998	0.999	12.612	0.002997	0.048055	16	12.671	0.015984	0.37163	5	3.1812	0.44955	0.7697
leucine	59	8.8953	0.007992	0.92907	-3.8253	0.84216	0.91779	15.328	0.000999	0.027326	33	18.052	0.001998	0.28388	22	9.9933	0.054945	0.39921
STAR	27	9.0728	0.005994	0.92907	-7.9487	0.997	0.999	12.891	0.005994	0.073348	18	13.436	0.00999	0.28388	9	3.3262	0.5954	0.91328
(6Z,9Z)-octadecadienoyl-CoA	48	-4.7786	0.99001	1	8.6309	0.002997	0.15485	7.8584	0.091908	0.39208	21	3.7682	0.87812	1	25	10.719	0.064935	0.40586
(8Z,11Z,14Z,17Z)-eicosatetraenoyl-CoA	50	-4.7918	0.98402	1	8.6029	0.002997	0.15485	6.4806	0.16683	0.58329	21	3.7682	0.87812	1	26	10.43	0.088911	0.41899
AMP	343	-3.7056	0.998	1	8.9367	0.001998	0.15485	25.384	0.000999	0.027326	164	18.514	0.58941	1	163	28.54	0.000999	0.077423
NADP+	275	-0.59081	0.92807	1	9.2029	0.001998	0.15485	9.7341	0.19281	0.62696	134	13.544	0.92108	1	116	19.487	0.017982	0.25338
NADPH	264	-0.55137	0.92507	1	9.3594	0.001998	0.15485	9.4184	0.21479	0.64436	129	13.491	0.90709	1	110	19.55	0.012987	0.23227
PPi	395	-6.4591	1	1	13.993	0.000999	0.15485	31.137	0.000999	0.027326	188	20.075	0.57043	1	192	33.682	0.000999	0.077423
activation-ppara	83	-3.5926	0.98102	1	12.943	0.000999	0.15485	12.087	0.013986	0.11023	44	8.3274	0.70729	1	33	18.129	0.000999	0.077423
linolenoyl-CoA	48	-4.7786	0.99001	1	8.6309	0.002997	0.15485	7.8584	0.091908	0.39208	21	3.7682	0.87812	1	25	10.719	0.064935	0.40586
oleoyl-CoA	54	-4.7692	0.98801	1	10.204	0.000999	0.15485	10.232	0.017982	0.13708	25	4.7998	0.85115	1	27	13.012	0.011988	0.23227
(2E)-octadecenoyl-CoA	28	-4.8848	0.98501	1	9.9131	0.003996	0.17867	10.21	0.025974	0.17504	11	4.7499	0.50549	1	16	11.62	0.010989	0.22217
2-hydroxyestradiol-17beta	36	-3.0798	0.94006	1	7.7725	0.004995	0.17867	-0.84482	0.78422	1	16	0.1615	0.995	1	15	9.1229	0.050949	0.39921
RNA	74	-6.076	0.999	1	7.5946	0.004995	0.17867	15.501	0.000999	0.027326	33	6.6967	0.76324	1	41	14.818	0.00999	0.21115
acetyl-CoA	162	-0.89802	0.91508	1	7.1537	0.004995	0.17867	19.892	0.000999	0.027326	86	13.973	0.50849	1	71	19.54	0.003996	0.10323
gamma-linolenoyl-CoA	48	-4.127	0.98601	1	7.9793	0.005994	0.18581	8.2992	0.068931	0.3374	23	3.9539	0.87113	1	23	11.459	0.016983	0.24678
myristoyl-CoA	47	-4.575	0.97902	1	8.4699	0.005994	0.18581	8.4622	0.06993	0.33872	21	4.1302	0.84515	1	24	11.33	0.026973	0.3216
(5Z,8Z,11Z)-eicosatrienoyl-CoA	40	-3.7412	0.96304	1	7.9797	0.007992	0.2186	7.3464	0.11189	0.44852	17	4.7364	0.64236	1	21	9.4604	0.090909	0.41899
dihomo-gamma-linolenoyl-CoA	43	-5.4303	0.98801	1	9.5615	0.007992	0.2186	5.8397	0.2048	0.64436	18	2.8147	0.90709	1	22	10.869	0.030969	0.3349
(5Z,8Z,11Z,14Z,17Z)-eicosapentaenoyl-CoA	51	-3.9178	0.97203	1	7.6503	0.011988	0.22298	7.9627	0.082917	0.38556	24	4.019	0.8951	1	25	10.719	0.064935	0.40586
(6Z,9Z,12Z,15Z)-octadecatetraenoyl-CoA	52	-3.7471	0.96304	1	7.4422	0.00999	0.22298	7.938	0.094905	0.39403	25	4.013	0.91109	1	25	10.719	0.064935	0.40586
(8Z,11Z)-eicosadienoyl-CoA	42	-3.7635	0.96204	1	7.9473	0.008991	0.22298	5.8393	0.21379	0.64436	17	4.7364	0.64236	1	22	9.1554	0.1039	0.45151
THF	24	-6.0953	0.996	1	8.8193	0.010989	0.22298	10.463	0.00999	0.098837	9	4.1813	0.51648	1	14	12.541	0.000999	0.077423
formate	51	-3.6802	0.96404	1	7.6507	0.011988	0.22298	4.2236	0.35864	0.80955	24	3.215	0.94406	1	22	11.824	0.013986	0.23227
heptadecanoyl-CoA	42	-5.6529	0.99401	1	7.7185	0.011988	0.22298	6.0884	0.1978	0.63874	18	1.605	0.97802	1	22	10.461	0.042957	0.37689
linoleoyl-CoA	57	-4.0365	0.97203	1	7.5596	0.00999	0.22298	8.384	0.086913	0.3886	28	3.8854	0.95704	1	27	11.385	0.040959	0.37345
palmitoleoyl-CoA	45	-4.9764	0.98601	1	6.9686	0.010989	0.22298	6.0712	0.18482	0.61385	20	1.8424	0.97602	1	23	10.198	0.061938	0.40586
cis-vaccenoyl-CoA	46	-4.8212	0.98601	1	6.7907	0.013986	0.24087	6.3469	0.15684	0.56102	21	2.0629	0.97802	1	23	10.428	0.054945	0.39921
phosphatidylinositol-4,5-bisphosphate	45	-4.6536	0.98402	1	6.6231	0.013986	0.24087	10.603	0.013986	0.11023	21	4.7694	0.77522	1	23	11.985	0.00999	0.21115
(7Z)-octadecenoyl-CoA	37	-4.7043	0.98501	1	6.9125	0.014985	0.24886	4.5574	0.29271	0.70399	15	1.626	0.95405	1	20	8.4619	0.13986	0.52203
5,10-methylene-THF	25	-4.8766	0.98102	1	7.6007	0.016983	0.27231	4.643	0.22677	0.66327	13	0.69703	0.97802	1	10	11.739	0.002997	0.092907
ubiquinol	76	-4.9318	0.99301	1	6.4403	0.01998	0.2997	9.9775	0.043956	0.24047	32	4.6049	0.93606	1	43	10.544	0.24575	0.534
ubiquinone	76	-4.9318	0.99301	1	6.4403	0.01998	0.2997	9.9775	0.043956	0.24047	32	4.6049	0.93606	1	43	10.544	0.24575	0.534
(13Z)-octadecenoyl-CoA	39	-3.7823	0.97203	1	5.93	0.027972	0.31673	5.6964	0.21179	0.64436	16	3.4513	0.81319	1	21	8.3332	0.18082	0.52203
(7Z)-tetradecenoyl-CoA	39	-3.916	0.97502	1	6.0637	0.026973	0.31673	5.7306	0.20979	0.64436	17	2.8411	0.87612	1	20	9.0544	0.091908	0.41899
(9E)-octadecenoyl-CoA	39	-3.7823	0.97203	1	5.93	0.027972	0.31673	5.6964	0.21179	0.64436	16	3.4513	0.81319	1	21	8.3332	0.18082	0.52203
(9E)-tetradecenoyl-CoA	39	-3.7823	0.97203	1	5.93	0.027972	0.31673	5.6964	0.21179	0.64436	16	3.4513	0.81319	1	21	8.3332	0.18082	0.52203
(9Z,12Z,15Z,18Z,21Z)-tetracosapentaenoyl-CoA	36	-1.1625	0.83117	1	5.7108	0.028971	0.31673	4.4909	0.2967	0.70752	18	4.7504	0.70529	1	15	8.1127	0.093906	0.41987
AKG	62	-2.8404	0.95005	1	6.3011	0.021978	0.31673	14.767	0.000999	0.027326	24	13.518	0.010989	0.28388	33	15.857	0.003996	0.10323
CoA	250	1.4858	0.76923	1	4.3004	0.028971	0.31673	20.44	0.000999	0.027326	128	18.518	0.24675	1	110	20.231	0.002997	0.092907
GSSG	22	-3.4215	0.94605	1	6.3427	0.024975	0.31673	5.7304	0.15185	0.54736	9	4.5077	0.46354	1	11	8.9772	0.023976	0.30969
NADH	256	-1.2693	0.93706	1	5.0718	0.02997	0.31673	15.405	0.007992	0.088483	123	13.651	0.87512	1	121	17.6	0.12388	0.48002
alanine	83	1.3749	0.58941	1	5.2892	0.02997	0.31673	13.079	0.006993	0.083378	38	14.573	0.031968	0.66651	38	14.078	0.013986	0.23227
ferricytochrome C	33	-6.4724	0.996	1	6.4724	0.024975	0.31673	4.8482	0.25275	0.66327	10	0.17044	0.97103	1	22	7.5732	0.28172	0.57456
ferrocytochrome C	33	-6.4724	0.996	1	6.4724	0.024975	0.31673	4.8482	0.25275	0.66327	10	0.17044	0.97103	1	22	7.5732	0.28172	0.57456
malonyl-CoA	20	-3.1502	0.92707	1	6.0714	0.024975	0.31673	8.73	0.030969	0.19727	9	3.9545	0.54446	1	11	8.1945	0.053946	0.39921
cysteine	67	3.4371	0.26274	1	5.3893	0.030969	0.32001	22.194	0.000999	0.027326	38	16.461	0.007992	0.28388	27	18.593	0.000999	0.077423
histone-L-lysine	45	-3.7118	0.95804	1	5.704	0.031968	0.32316	9.6392	0.030969	0.19727	18	6.7488	0.44555	1	25	10.49	0.077922	0.40586
SAH	147	-4.9214	1	1	5.0214	0.033966	0.33605	11.507	0.03996	0.22947	68	7.147	0.98601	1	73	15.196	0.075924	0.40586
stearoyl-CoA	55	-4.3412	0.97702	1	6.1529	0.034965	0.33872	5.6011	0.22877	0.66327	24	2.8998	0.95504	1	28	9.8197	0.13586	0.52203
(10Z)-heptadecenoyl-CoA	28	-2.8306	0.93207	1	5.3927	0.038961	0.35523	3.7444	0.35265	0.79991	12	2.7619	0.82517	1	14	7.1266	0.18282	0.52203
(6Z,9Z,12Z,15Z,18Z,21Z)-tetracosahexaenoyl-CoA	34	-1.0343	0.74925	1	5.6531	0.038961	0.35523	6.1714	0.17183	0.59338	18	4.8492	0.6983	1	14	8.5071	0.080919	0.40586
9-heptadecenoyl-CoA	28	-2.8306	0.93207	1	5.3927	0.038961	0.35523	3.7444	0.35265	0.79991	12	2.7619	0.82517	1	14	7.1266	0.18282	0.52203
O2-	23	-5.4406	0.99101	1	5.4406	0.03996	0.35733	1.9386	0.50849	0.98549	6	-1.3803	0.98601	1	16	5.2219	0.52847	0.85326
1,2-diacylglycerol-LD-PI pool	42	-3.2111	0.94306	1	5.3588	0.041958	0.36812	2.248	0.55844	1	20	3.1299	0.91409	1	17	10.094	0.028971	0.32857
10-HETE	31	-1.3843	0.82917	1	3.9971	0.077922	0.36842	-7.2792	0.99201	1	13	-0.47132	0.997	1	12	3.0102	0.76224	0.94619
11,12,15-THETA	28	-1.3342	0.82517	1	4.0582	0.07992	0.36842	-5.87	0.97702	1	12	-0.13437	0.99101	1	11	3.1514	0.69231	0.91328
11,14,15-THETA	28	-1.3342	0.82517	1	4.0582	0.07992	0.36842	-5.87	0.97702	1	12	-0.13437	0.99101	1	11	3.1514	0.69231	0.91328
11-HETE	29	-1.2783	0.80919	1	3.9449	0.091908	0.36842	-5.997	0.97802	1	13	-0.47132	0.997	1	11	3.1514	0.69231	0.91328
11h-14,15-EETA	28	-1.3342	0.82517	1	4.0582	0.07992	0.36842	-5.87	0.97702	1	12	-0.13437	0.99101	1	11	3.1514	0.69231	0.91328
13-HETE	29	-1.2783	0.80919	1	3.9449	0.091908	0.36842	-5.997	0.97802	1	13	-0.47132	0.997	1	11	3.1514	0.69231	0.91328
15H-11,12-EETA	28	-1.3342	0.82517	1	4.0582	0.07992	0.36842	-5.87	0.97702	1	12	-0.13437	0.99101	1	11	3.1514	0.69231	0.91328
16(R)-HETE	28	-1.3342	0.82517	1	4.0582	0.07992	0.36842	-5.87	0.97702	1	12	-0.13437	0.99101	1	11	3.1514	0.69231	0.91328
16alpha-hydroxyestrone	28	-1.3342	0.82517	1	4.0582	0.07992	0.36842	-5.87	0.97702	1	12	-0.13437	0.99101	1	11	3.1514	0.69231	0.91328
17-HETE	29	-1.2783	0.80919	1	3.9449	0.091908	0.36842	-5.997	0.97802	1	13	-0.47132	0.997	1	11	3.1514	0.69231	0.91328
18-HETE	29	-1.2783	0.80919	1	3.9449	0.091908	0.36842	-5.997	0.97802	1	13	-0.47132	0.997	1	11	3.1514	0.69231	0.91328
18-hydroxy-all-trans-retinoate	28	-1.3342	0.82517	1	4.0582	0.07992	0.36842	-5.87	0.97702	1	12	-0.13437	0.99101	1	11	3.1514	0.69231	0.91328
19(S)-HETE	28	-1.3342	0.82517	1	4.0582	0.07992	0.36842	-5.87	0.97702	1	12	-0.13437	0.99101	1	11	3.1514	0.69231	0.91328
19-hydroxyandrostenedione	29	-1.2783	0.80919	1	3.9449	0.091908	0.36842	-5.997	0.97802	1	13	-0.47132	0.997	1	11	3.1514	0.69231	0.91328
19-hydroxytestosterone	29	-1.2783	0.80919	1	3.9449	0.091908	0.36842	-5.997	0.97802	1	13	-0.47132	0.997	1	11	3.1514	0.69231	0.91328
19-oxo-testosterone	29	-1.2783	0.80919	1	3.9449	0.091908	0.36842	-5.997	0.97802	1	13	-0.47132	0.997	1	11	3.1514	0.69231	0.91328
19-oxoandrostenedione	29	-1.2783	0.80919	1	3.9449	0.091908	0.36842	-5.997	0.97802	1	13	-0.47132	0.997	1	11	3.1514	0.69231	0.91328
1D-myo-inositol-1,4-bisphosphate	20	-1.6548	0.8042	1	4.6519	0.058941	0.36842	5.7344	0.14486	0.52623	10	3.8259	0.59241	1	9	7.252	0.082917	0.40586
2-oxobutyrate	20	-1.3056	0.76324	1	4.2268	0.070929	0.36842	6.9068	0.091908	0.39208	11	3.044	0.77722	1	9	6.9308	0.11588	0.47269
5-oxo-(6E)-12-epi-LTB4	32	-1.1443	0.8012	1	3.6585	0.083916	0.36842	-5.8137	0.97403	1	15	-0.60926	0.997	1	12	3.0368	0.75325	0.94619
5-oxo-6-trans-LTB4	31	-1.1877	0.8032	1	3.7497	0.091908	0.36842	-5.6632	0.98002	1	14	-0.26824	0.998	1	12	3.0368	0.75325	0.94619
5-tetradecenoyl-CoA	41	-3.021	0.93906	1	5.1129	0.044955	0.36842	6.2726	0.17483	0.59338	19	3.6915	0.86114	1	20	9.0544	0.091908	0.41899
6,7-dihydro-5-oxo-12-epi-LTB4	38	-1.6708	0.84416	1	3.945	0.080919	0.36842	-2.7874	0.8991	1	18	0.83618	0.99001	1	15	5.2459	0.48551	0.80796
6,7-dihydro-5-oxo-LTB4	38	-1.6708	0.84416	1	3.945	0.080919	0.36842	-2.7874	0.8991	1	18	0.83618	0.99001	1	15	5.2459	0.48551	0.80796
6,7-dihydro-LTB4	29	-1.2783	0.80919	1	3.9449	0.091908	0.36842	-5.997	0.97802	1	13	-0.47132	0.997	1	11	3.1514	0.69231	0.91328
7,12-Dimethylbenz[A]Anthracene-3,4-Diol	28	-1.2157	0.81718	1	4.001	0.081918	0.36842	-6.9973	0.99201	1	11	0.53635	0.97802	1	11	3.1514	0.69231	0.91328
7,12-Dimethylbenz[A]Anthracene-3,4-Diol-1,2-Epoxide	26	-1.8435	0.86913	1	4.6943	0.058941	0.36842	-6.1437	0.98302	1	10	-0.23119	0.98102	1	11	3.1514	0.69231	0.91328
7,12-Dimethylbenz[A]Anthracene-3,4-Oxide	28	-1.2157	0.81718	1	4.001	0.081918	0.36842	-6.9973	0.99201	1	11	0.53635	0.97802	1	11	3.1514	0.69231	0.91328
7,12-dimethylbenz[a]anthracene	28	-1.7102	0.85614	1	4.4342	0.062937	0.36842	-6.4096	0.98402	1	12	-0.95868	1	1	11	3.1514	0.69231	0.91328
7-HETE	29	-1.2783	0.80919	1	3.9449	0.091908	0.36842	-5.997	0.97802	1	13	-0.47132	0.997	1	11	3.1514	0.69231	0.91328
7-hexadecenoyl-CoA	41	-3.021	0.93906	1	5.1129	0.044955	0.36842	6.2726	0.17483	0.59338	19	3.6915	0.86114	1	20	9.0544	0.091908	0.41899
8-HETE	29	-1.2783	0.80919	1	3.9449	0.091908	0.36842	-5.997	0.97802	1	13	-0.47132	0.997	1	11	3.1514	0.69231	0.91328
9-HETE	29	-1.2783	0.80919	1	3.9449	0.091908	0.36842	-5.997	0.97802	1	13	-0.47132	0.997	1	11	3.1514	0.69231	0.91328
ADP	442	1.7976	0.82917	1	2.4161	0.081918	0.36842	27.669	0.000999	0.027326	235	22.747	0.53846	1	192	25.702	0.001998	0.092907
Benzo[A]Pyrene-2,3-Oxide	28	-1.2157	0.81718	1	4.001	0.081918	0.36842	-6.9973	0.99201	1	11	0.53635	0.97802	1	11	3.1514	0.69231	0.91328
D-myo-inositol-1,4,5-trisphosphate	24	-1.529	0.82018	1	4.253	0.071928	0.36842	5.5641	0.16384	0.58156	13	3.2101	0.79421	1	10	7.5558	0.075924	0.40586
Dibenzo[A,L]Pyrene	26	-1.8435	0.86913	1	4.6943	0.058941	0.36842	-6.1437	0.98302	1	10	-0.23119	0.98102	1	11	3.1514	0.69231	0.91328
Dibenzo[A,L]Pyrene-11,12-Diol	28	-1.2157	0.81718	1	4.001	0.081918	0.36842	-6.9973	0.99201	1	11	0.53635	0.97802	1	11	3.1514	0.69231	0.91328
Dibenzo[A,L]Pyrene-11,12-Diol-13,14-Epoxide	26	-1.8435	0.86913	1	4.6943	0.058941	0.36842	-6.1437	0.98302	1	10	-0.23119	0.98102	1	11	3.1514	0.69231	0.91328
Dibenzo[A,L]Pyrene-11,12-Epoxide	28	-1.2157	0.81718	1	4.001	0.081918	0.36842	-6.9973	0.99201	1	11	0.53635	0.97802	1	11	3.1514	0.69231	0.91328
GTP	122	-2.1165	0.95405	1	3.4611	0.075924	0.36842	12.136	0.022977	0.16437	58	9.713	0.72827	1	59	13.165	0.12288	0.48002
NAD+	294	0.47087	0.84815	1	3.1391	0.087912	0.36842	17.116	0.005994	0.073348	143	16.459	0.6993	1	137	18.078	0.18781	0.52203
Na+	118	2.2478	0.54446	1	3.1231	0.091908	0.36842	2.4176	0.67732	1	58	10.673	0.59041	1	43	12.892	0.051948	0.39921
SAM	150	-3.2756	0.97502	1	3.3746	0.090909	0.36842	11.264	0.048951	0.26097	73	7.8303	0.96903	1	71	14.279	0.12288	0.48002
[protein]-N6,N6-dimethyl-L-lysine	27	-5.4911	0.98501	1	5.4911	0.046953	0.36842	10.952	0.010989	0.10019	8	5.6819	0.28571	1	19	9.3685	0.071928	0.40586
[protein]-N6-methyl-L-lysine	25	-5.3689	0.98402	1	5.3689	0.04995	0.36842	11.057	0.010989	0.10019	7	6.182	0.19281	1	18	9.1753	0.065934	0.40586
acetate	62	-1.9712	0.90809	1	3.717	0.090909	0.36842	2.9362	0.52148	0.98549	33	3.4441	0.97203	1	23	10.966	0.033966	0.34335
adenosine	30	-1.5468	0.83117	1	3.9327	0.085914	0.36842	12.05	0.002997	0.048055	16	6.6229	0.37962	1	14	10.559	0.016983	0.24678
arachidonyl-CoA	65	-1.7823	0.8971	1	5.1006	0.045954	0.36842	8.655	0.065934	0.32616	34	6.0542	0.85714	1	28	11.17	0.04995	0.39921
benzo[a]pyrene	28	-1.7102	0.85614	1	4.4342	0.062937	0.36842	-6.4096	0.98402	1	12	-0.95868	1	1	11	3.1514	0.69231	0.91328
cholesterol	51	0.2045	0.69431	1	4.4575	0.056943	0.36842	6.8596	0.13786	0.51698	25	8.1414	0.37962	1	21	10.764	0.032967	0.34066
dADP	36	-4.0508	0.96703	1	4.0508	0.074925	0.36842	10.035	0.022977	0.16437	17	5.1665	0.58541	1	18	11.106	0.013986	0.23227
dopamine	36	-1.3703	0.85015	1	3.6797	0.08991	0.36842	2.9648	0.45355	0.93109	16	3.9785	0.75824	1	16	8.6782	0.082917	0.40586
formaldehyde	25	-2.1988	0.88012	1	4.984	0.058941	0.36842	3.3082	0.34266	0.7849	13	2.0034	0.91109	1	9	11.315	0.003996	0.10323
heneicosanoyl-CoA	39	-3.7629	0.97003	1	3.7629	0.085914	0.36842	2.2323	0.52348	0.98549	17	1.5082	0.96204	1	19	7.4218	0.24076	0.534
histone-N6-methyl-L-lysine	27	-5.4911	0.98501	1	5.4911	0.046953	0.36842	10.952	0.010989	0.10019	8	5.6819	0.28571	1	19	9.3685	0.071928	0.40586
inosine	20	-0.68101	0.69131	1	3.6032	0.090909	0.36842	10.107	0.00999	0.098837	11	5.993	0.33766	1	9	8.4414	0.040959	0.37345
inositol-1-phosphate	23	-2.5644	0.8961	1	5.3497	0.044955	0.36842	6.98	0.083916	0.38635	13	3.1909	0.7962	1	9	10.06	0.015984	0.24678
myristic acid	36	-1.318	0.84615	1	3.8801	0.07992	0.36842	-7.3192	0.996	1	14	4.204	0.65235	1	12	6.4809	0.21678	0.52203
nonadecanoyl-CoA	42	-4.1104	0.97403	1	4.1104	0.088911	0.36842	2.7923	0.4985	0.98222	18	1.605	0.97802	1	21	7.8374	0.24276	0.534
palmitate	46	-1.8739	0.85315	1	4.0512	0.07992	0.36842	-4.4545	0.97103	1	18	4.932	0.68931	1	18	7.297	0.24975	0.53766
pyruvate	51	-2.1762	0.9011	1	4.0425	0.068931	0.36842	6.9667	0.13387	0.50608	25	4.526	0.87712	1	24	8.8878	0.15884	0.52203
sulfite	33	-1.182	0.8022	1	3.6079	0.081918	0.36842	1.8603	0.54146	1	15	3.1543	0.83716	1	14	8.3674	0.090909	0.41899
margaric acid	34	-1.3298	0.78322	1	3.9426	0.1029	0.40208	-5.8527	0.98402	1	14	4.204	0.65235	1	11	7.2451	0.10689	0.45187
pentadecylic acid	34	-1.3298	0.78322	1	3.9426	0.1029	0.40208	-5.8527	0.98402	1	14	4.204	0.65235	1	11	7.2451	0.10689	0.45187
tridecylic acid	34	-1.3298	0.78322	1	3.9426	0.1029	0.40208	-5.8527	0.98402	1	14	4.204	0.65235	1	11	7.2451	0.10689	0.45187
(11Z)-eicosenoyl-CoA	46	-3.3393	0.95005	1	3.3393	0.11489	0.41106	3.1974	0.42058	0.9035	21	2.0629	0.97802	1	22	7.8587	0.24476	0.534
(11Z,14Z)-eicosadienoyl-CoA	46	-3.2153	0.94605	1	3.2153	0.12288	0.41106	3.1658	0.42358	0.9035	20	2.5815	0.94705	1	23	7.2054	0.37363	0.66566
(11Z,14Z,17Z)-eicosatrienoyl-CoA	46	-3.2153	0.94605	1	3.2153	0.12288	0.41106	3.1658	0.42358	0.9035	20	2.5815	0.94705	1	23	7.2054	0.37363	0.66566
(R)-1,2-dimethyl-5,6-dihydroxy-tetrahydroisoquinoline	76	-2.7661	0.95904	1	2.9023	0.11888	0.41106	10.124	0.040959	0.22947	39	4.4279	0.97103	1	37	9.9638	0.23277	0.52768
1-phosphatidyl-1D-myo-inositol-4-phosphate	62	-1.3461	0.85714	1	3.0614	0.11788	0.41106	7.6195	0.13087	0.50608	28	7.542	0.52647	1	30	9.6629	0.17283	0.52203
10,13,16,19-docosatetraenoyl-CoA	46	-3.2153	0.94605	1	3.2153	0.12288	0.41106	3.1658	0.42358	0.9035	20	2.5815	0.94705	1	23	7.2054	0.37363	0.66566
12(13)-EpOME	30	-0.74565	0.73327	1	3.4123	0.11289	0.41106	-6.7115	0.98701	1	13	0.56704	0.98202	1	11	3.1514	0.69231	0.91328
5,6-EET	31	-0.70328	0.74925	1	3.3161	0.11189	0.41106	-6.824	0.99201	1	14	0.21665	0.98801	1	11	3.1514	0.69231	0.91328
8,9-EET	31	-0.70328	0.74925	1	3.3161	0.11189	0.41106	-6.824	0.99201	1	14	0.21665	0.98801	1	11	3.1514	0.69231	0.91328
9(10)-EpOME	30	-0.74565	0.73327	1	3.4123	0.11289	0.41106	-6.7115	0.98701	1	13	0.56704	0.98202	1	11	3.1514	0.69231	0.91328
9-eicosenoyl-CoA	46	-3.2153	0.94605	1	3.2153	0.12288	0.41106	3.1658	0.42358	0.9035	20	2.5815	0.94705	1	23	7.2054	0.37363	0.66566
FADH2	69	0.25987	0.71728	1	3.0762	0.10889	0.41106	6.11	0.23077	0.66327	32	8.386	0.51948	1	31	9.4423	0.1988	0.52203
[protein]-N6,N6,N6-trimethyl-L-lysine	32	-3.136	0.93706	1	3.136	0.11489	0.41106	12.131	0.007992	0.088483	12	7.7831	0.16783	1	20	9.3157	0.080919	0.40586
beta-carboline	76	-2.7661	0.95904	1	2.9023	0.11888	0.41106	10.124	0.040959	0.22947	39	4.4279	0.97103	1	37	9.9638	0.23277	0.52768
estradiol-17beta	54	-0.73287	0.78921	1	2.9102	0.11988	0.41106	-19.252	1	1	19	-0.41616	0.998	1	17	1.9678	0.96603	0.99121
glutamine	65	2.3723	0.40859	1	3.3935	0.12088	0.41106	17.934	0.000999	0.027326	31	17.24	0.005994	0.28388	30	14.869	0.001998	0.092907
harman	76	-2.7661	0.95904	1	2.9023	0.11888	0.41106	10.124	0.040959	0.22947	39	4.4279	0.97103	1	37	9.9638	0.23277	0.52768
octanoyl-CoA	27	-0.93497	0.74326	1	3.5478	0.11588	0.41106	2.3371	0.47153	0.94103	13	2.7099	0.84815	1	12	5.4249	0.34865	0.64703
serine	71	2.1621	0.43956	1	3.5398	0.10989	0.41106	20.901	0.000999	0.027326	36	16.854	0.013986	0.34229	33	15.912	0.002997	0.092907
tridecanoyl-CoA	33	-3.0655	0.93706	1	3.0655	0.11289	0.41106	3.387	0.38362	0.84944	14	2.4241	0.86014	1	17	6.5014	0.30969	0.61805
glutamate	108	0.65059	0.73427	1	2.5787	0.12488	0.41476	12.94	0.012987	0.1098	53	14.76	0.068931	1	45	16.266	0.002997	0.092907
(13Z)-docosenoyl-CoA	43	-2.9734	0.94006	1	2.9734	0.12587	0.41512	2.6733	0.4955	0.98047	20	1.9817	0.97003	1	20	7.4453	0.26274	0.55492
1,2-diacylglycerol-LD-PS pool	28	-2.853	0.93506	1	2.853	0.12987	0.42528	-0.50888	0.74226	1	12	1.8606	0.8951	1	12	6.8416	0.17682	0.52203
Pi	441	1.6591	0.85115	1	1.4434	0.13087	0.42555	21.111	0.000999	0.027326	221	21.949	0.56444	1	195	23.078	0.030969	0.3349
GDP	117	-2.4211	0.94705	1	2.5603	0.13786	0.44518	13.305	0.007992	0.088483	53	10.569	0.52847	1	60	12.885	0.15784	0.52203
pentadecanoyl-CoA	34	-3.2272	0.93207	1	3.2272	0.13986	0.44852	3.4607	0.37962	0.84461	14	2.4241	0.86014	1	18	6.4885	0.36763	0.66566
palmitoyl-CoA	80	-0.096004	0.75824	1	2.6982	0.14486	0.46135	8.5588	0.1029	0.42343	39	8.67	0.58841	1	36	10.576	0.14186	0.52203
eicosanoyl-CoA	51	-2.6347	0.92308	1	2.6347	0.14585	0.46138	4.1872	0.36064	0.81013	24	3.127	0.94505	1	24	8.0042	0.25175	0.53912
1-radyl-2-acyl-sn-glycero-3-phosphocholine	42	-0.48022	0.72927	1	2.9808	0.14885	0.46767	2.6525	0.51049	0.98549	21	5.093	0.73526	1	16	8.7247	0.080919	0.40586
(7Z,10Z,13Z,16Z)-docosatetraenoyl-CoA	48	-2.4837	0.92208	1	2.4837	0.15185	0.47073	4.7971	0.32168	0.75166	23	2.912	0.95205	1	23	7.4416	0.33566	0.64232
threonine	49	4.0276	0.21379	1	2.5411	0.15085	0.47073	20.354	0.000999	0.027326	27	17.188	0.002997	0.28388	20	15.56	0.000999	0.077423
salsolinol	79	-2.2525	0.93506	1	2.3861	0.15485	0.47684	10.322	0.036963	0.22036	41	4.8961	0.97003	1	38	9.7974	0.28072	0.57456
UTP	94	-1.9754	0.93307	1	1.9754	0.15984	0.48263	14.225	0.005994	0.073348	46	9.8209	0.53147	1	46	12.934	0.054945	0.39921
peptidylproline-(omega=0)	35	-2.731	0.91309	1	2.731	0.15984	0.48263	4.5035	0.27273	0.66883	14	2.3515	0.87013	1	20	5.8258	0.51648	0.83974
peptidylproline-(omega=180)	35	-2.731	0.91309	1	2.731	0.15984	0.48263	4.5035	0.27273	0.66883	14	2.3515	0.87013	1	20	5.8258	0.51648	0.83974
(7Z,10Z,13Z,16Z,19Z)-docosapentaenoyl-CoA	49	-2.3736	0.91508	1	2.3736	0.16184	0.48551	3.4132	0.43457	0.91455	23	2.912	0.95205	1	23	7.2054	0.37363	0.66566
1,2-diacylglycerol-LD-PE pool	32	-2.3534	0.89211	1	2.3534	0.16983	0.503	-0.29246	0.74126	1	14	2.1589	0.89011	1	14	6.1753	0.31968	0.62722
10,13,16-docosatrienoyl-CoA	40	-2.449	0.91009	1	2.449	0.16883	0.503	2.5095	0.51748	0.98549	16	3.4513	0.81319	1	21	5.8253	0.56843	0.896
dAMP	32	-2.2708	0.88911	1	2.2708	0.17283	0.50864	10.833	0.013986	0.11023	16	5.8384	0.47652	1	16	9.4824	0.053946	0.39921
dATP	47	-2.2857	0.91209	1	2.2855	0.17882	0.52297	11.656	0.013986	0.11023	22	7.5505	0.38262	1	24	10.758	0.041958	0.3752
(11Z)-docosenoyl-CoA	39	-2.154	0.89011	1	2.154	0.2028	0.56131	2.2758	0.51748	0.98549	16	3.4513	0.81319	1	20	5.5981	0.55544	0.88151
(13Z,16Z)-docosadienoyl-CoA	39	-2.154	0.89011	1	2.154	0.2028	0.56131	2.2758	0.51748	0.98549	16	3.4513	0.81319	1	20	5.5981	0.55544	0.88151
(4Z,7Z,10Z,13Z,16Z,19Z)-docosahexaenoyl-CoA	43	-1.8776	0.87812	1	1.8776	0.1998	0.56131	4.3585	0.32368	0.75255	19	3.7225	0.85415	1	22	6.1345	0.52647	0.853
13,16,19-docosatrienoyl-CoA	39	-2.154	0.89011	1	2.154	0.2028	0.56131	2.2758	0.51748	0.98549	16	3.4513	0.81319	1	20	5.5981	0.55544	0.88151
FAD	85	1.6788	0.58442	1	1.3003	0.2008	0.56131	7.3439	0.14286	0.52623	42	9.7709	0.48352	1	37	8.8186	0.38861	0.68709
ceramide pool	43	-1.8536	0.87712	1	1.8536	0.2028	0.56131	10.808	0.011988	0.10518	20	6.8668	0.44356	1	23	8.3744	0.20679	0.52203
dopaminochrome	26	0.82241	0.54745	1	2.0354	0.2028	0.56131	1.7303	0.53447	1	9	7.762	0.12288	1	12	7.6742	0.12088	0.48002
linoleate	62	-0.080222	0.73127	1	1.9658	0.1968	0.56131	-8.6824	0.997	1	28	3.5624	0.96903	1	20	6.198	0.45554	0.77028
retinoate	40	0.19025	0.63037	1	2.0839	0.1958	0.56131	-6.6948	0.99301	1	19	1.0064	0.99101	1	14	2.87	0.85415	0.96637
docosanoyl-CoA	50	-1.7401	0.87912	1	1.7401	0.20779	0.57174	4.4287	0.33666	0.77499	24	3.9089	0.90609	1	23	7.6722	0.2987	0.60128
PI pool	84	1.8137	0.55345	1	1.4084	0.21179	0.57257	7.3314	0.16683	0.58329	47	9.0223	0.7013	1	30	11.467	0.054945	0.39921
asparagine	53	4.67	0.14985	1	1.7632	0.21179	0.57257	15.752	0.001998	0.04223	28	16.411	0.005994	0.28388	21	13.24	0.002997	0.092907
triiodothyronine	31	-1.6921	0.85814	1	1.6921	0.20979	0.57257	-19.414	1	1	7	1.1903	0.83716	1	9	3.9678	0.48052	0.80665
(13Z)-eicosenoyl-CoA	45	-1.6762	0.86613	1	1.6762	0.23277	0.59471	2.2443	0.55145	1	22	2.6972	0.95704	1	20	6.0447	0.48052	0.80665
1,2-diacylglycerol-LD-PC pool	30	-1.7306	0.84515	1	1.7306	0.22777	0.59471	0.49041	0.66833	1	13	3.3462	0.78222	1	13	6.5065	0.24476	0.534
1,2-diacylglycerol-LD-SM pool	26	-1.6799	0.85914	1	1.6799	0.22877	0.59471	-1.6165	0.83017	1	12	1.8606	0.8951	1	10	5.7396	0.24076	0.534
DNA	34	-2.121	0.85315	1	2.1208	0.22577	0.59471	9.5194	0.02997	0.19628	15	6.5567	0.35564	1	18	9.0327	0.076923	0.40586
O2	226	3.9087	0.44056	1	0.99692	0.22977	0.59471	10.951	0.091908	0.39208	114	16.421	0.43257	1	94	14.138	0.31369	0.62335
SM pool	24	1.6917	0.45455	1	1.6275	0.23177	0.59471	2.1653	0.47852	0.95091	13	5.0658	0.53047	1	8	6.0003	0.17682	0.52203
cAMP	46	0.056822	0.66334	1	1.9124	0.22577	0.59471	4.8014	0.26673	0.66327	24	4.3105	0.87113	1	20	6.2312	0.45255	0.7697
cGMP	46	0.056822	0.66334	1	1.9124	0.22577	0.59471	4.8014	0.26673	0.66327	24	4.3105	0.87113	1	20	6.2312	0.45255	0.7697
dopamine-O-quinone	27	0.91558	0.51449	1	1.9422	0.23277	0.59471	0.20044	0.6953	1	10	7.121	0.20779	1	11	8.376	0.048951	0.39921
sphingosine	26	-1.7143	0.85914	1	1.7143	0.22677	0.59471	7.3272	0.085914	0.3886	12	4.3867	0.59341	1	14	5.9239	0.34765	0.64703
12,15,18,21-tetracosatetraenoyl-CoA	29	-1.5251	0.84016	1	1.5251	0.23976	0.60264	-0.30208	0.75125	1	12	2.2602	0.87013	1	14	4.055	0.69331	0.91328
PS-LD pool	25	1.5658	0.40759	1	1.677	0.23976	0.60264	3.832	0.2987	0.70865	14	6.035	0.38861	1	8	7.4981	0.06993	0.40586
dCTP	40	-1.7046	0.84815	1	1.7044	0.23776	0.60264	10.556	0.023976	0.1664	18	7.6389	0.31868	1	21	9.2881	0.1019	0.44701
phosphatidate-LD-PI pool	25	-1.5984	0.82717	1	1.5984	0.24675	0.61688	8.2964	0.04995	0.26097	14	3.9292	0.69231	1	11	8.0746	0.058941	0.40586
PE-LD pool	57	0.51911	0.62537	1	1.6107	0.24875	0.61855	3.2292	0.46054	0.93109	29	6.351	0.73526	1	22	8.4079	0.18681	0.52203
[protein]-L-lysine	208	-0.67053	0.9041	1	0.89436	0.25075	0.61938	18.376	0.000999	0.027326	103	15.927	0.38362	1	96	18.092	0.022977	0.30969
lauric acid	51	0.74655	0.63037	1	1.2937	0.25175	0.61938	-5.3379	0.98402	1	23	5.1925	0.74026	1	18	4.4956	0.68332	0.91328
phosphatidate-LD-SM pool	20	-1.5323	0.7952	1	1.5323	0.25475	0.62019	7.7864	0.054945	0.27771	11	3.8299	0.65934	1	9	7.3731	0.07992	0.40586
phosphatidate-bile-PC pool	20	-1.5323	0.7952	1	1.5323	0.25475	0.62019	7.7864	0.054945	0.27771	11	3.8299	0.65934	1	9	7.3731	0.07992	0.40586
CO2	124	1.4787	0.61838	1	1.1412	0.26374	0.63783	13.504	0.010989	0.10019	61	13.686	0.22977	1	57	12.284	0.19081	0.52203
PC-LD pool	63	0.91096	0.61938	1	1.14	0.26474	0.63783	1.833	0.63936	1	31	7.0994	0.65634	1	24	8.3074	0.21079	0.52203
15(S)-HPETE	41	0.98908	0.55145	1	1.2514	0.27173	0.63815	-5.493	0.98102	1	21	2.1798	0.97303	1	13	3.4128	0.73327	0.94619
CTP	69	0.67303	0.67433	1	0.92298	0.27073	0.63815	13.462	0.008991	0.095019	38	10.371	0.33566	1	29	11.942	0.028971	0.32857
IDP	26	-1.2728	0.81419	1	1.2728	0.27073	0.63815	4.9441	0.21379	0.64436	11	5.7158	0.36663	1	13	6.2882	0.26773	0.55828
O-1-alk-1-enyl-2-acyl-sn-glycero-3-phosphoethanolamine	46	0.87031	0.55245	1	1.5051	0.26673	0.63815	3.426	0.4016	0.88306	25	5.9125	0.7013	1	16	8.6804	0.082917	0.40586
arachidonate	76	0.61861	0.65834	1	1.0541	0.27173	0.63815	-8.1488	0.998	1	36	3.9589	0.97502	1	25	5.6701	0.67133	0.91328
(2E)-hexadecenoyl-CoA	29	-1.1286	0.79421	1	1.1286	0.28172	0.655	7.2095	0.093906	0.39339	15	3.7384	0.77423	1	14	6.5065	0.26773	0.55828
1,2-diacylglycerol-LD-TAG pool	56	1.1877	0.54745	1	1.2113	0.28072	0.655	1.4737	0.65035	1	30	6.4144	0.73427	1	18	9.7985	0.037962	0.36776
1-organyl-2-lyso-sn-glycero-3-phosphocholine	31	-0.76087	0.75425	1	0.76087	0.2967	0.67631	1.1526	0.61239	1	15	2.9127	0.85914	1	13	5.4819	0.39461	0.69242
N-acetyl-S-[2-carboxy-1-(1H-imidazol-4-yl)ethyl]-L-cysteine	21	-1.1823	0.74426	1	1.1823	0.2967	0.67631	4.8017	0.2028	0.64436	13	1.3383	0.96004	1	8	6.0737	0.17183	0.52203
S-[2-carboxy-1-(1H-imidazol-4-yl)ethyl]-L-cysteine	21	-1.1823	0.74426	1	1.1823	0.2967	0.67631	4.8017	0.2028	0.64436	13	1.3383	0.96004	1	8	6.0737	0.17183	0.52203
chloride	40	1.1362	0.50849	1	1.1911	0.2967	0.67631	4.452	0.32867	0.76036	18	7.4102	0.35065	1	17	9.1595	0.058941	0.40586
testosterone	47	1.495	0.51049	1	0.65266	0.3047	0.69114	-8.5149	1	1	21	2.9743	0.94406	1	16	2.5225	0.9031	0.99121
4-androstene-3,17-dione	47	1.4003	0.52348	1	0.61553	0.30869	0.6968	-3.1026	0.93906	1	24	2.3502	0.97602	1	18	1.9477	0.96703	0.99121
sphinganine	22	-0.89368	0.75425	1	0.89368	0.31169	0.69904	6.5337	0.1049	0.42786	10	4.7032	0.45754	1	12	4.5533	0.4965	0.82162
tricosanoyl-CoA	27	-1.1607	0.76024	1	1.1607	0.31269	0.69904	0.94755	0.62537	1	12	2.2602	0.87013	1	13	3.7479	0.68132	0.91328
propanoyl-CoA	66	2.5352	0.4006	1	0.73077	0.31968	0.71125	12.035	0.012987	0.1098	34	11.205	0.20579	1	30	8.9197	0.24875	0.53766
estrone	44	2.3819	0.36663	1	0.83291	0.32468	0.71552	-3.359	0.93307	1	19	5.206	0.67832	1	18	2.9447	0.89311	0.9888
thyroxine	27	-1.0017	0.74825	1	1.0017	0.32368	0.71552	-20.9	1	1	6	1.785	0.72328	1	6	4.1517	0.32667	0.63825
(10Z)-heptadecenoic acid	32	0.33693	0.61039	1	-0.33693	0.46354	0.73307	-7.2284	0.99201	1	14	4.204	0.65235	1	9	5.7553	0.22677	0.52203
(11Z,14Z)-eicosadienoic acid	32	0.33693	0.61039	1	-0.33693	0.46354	0.73307	-7.2284	0.99201	1	14	4.204	0.65235	1	9	5.7553	0.22677	0.52203
(11Z,14Z,17Z)-eicosatrienoic acid	32	0.33693	0.61039	1	-0.33693	0.46354	0.73307	-7.2284	0.99201	1	14	4.204	0.65235	1	9	5.7553	0.22677	0.52203
(13Z)-eicosenoic acid	32	0.33693	0.61039	1	-0.33693	0.46354	0.73307	-7.2284	0.99201	1	14	4.204	0.65235	1	9	5.7553	0.22677	0.52203
(13Z)-octadecenoic acid	32	0.33693	0.61039	1	-0.33693	0.46354	0.73307	-7.2284	0.99201	1	14	4.204	0.65235	1	9	5.7553	0.22677	0.52203
(13Z,16Z)-docosadienoic acid	32	0.33693	0.61039	1	-0.33693	0.46354	0.73307	-7.2284	0.99201	1	14	4.204	0.65235	1	9	5.7553	0.22677	0.52203
(15Z)-tetracosenoyl-CoA	43	0.44238	0.64236	1	-0.44238	0.46154	0.73307	2.9871	0.46653	0.93508	23	4.2199	0.85215	1	17	5.8157	0.41958	0.73073
(4Z,7Z,10Z,13Z,16Z)-DPA	32	0.33693	0.61039	1	-0.33693	0.46354	0.73307	-7.2284	0.99201	1	14	4.204	0.65235	1	9	5.7553	0.22677	0.52203
(4Z,7Z,10Z,13Z,16Z)-docosapentaenoyl-CoA	44	-0.53499	0.73726	1	0.53499	0.34965	0.73307	4.9496	0.25375	0.66327	21	4.8306	0.77023	1	21	5.9168	0.54545	0.87763
(6Z,9Z)-octadecadienoic acid	32	0.33693	0.61039	1	-0.33693	0.46354	0.73307	-7.2284	0.99201	1	14	4.204	0.65235	1	9	5.7553	0.22677	0.52203
(6Z,9Z,12Z,15Z,18Z)-TPA	32	0.33693	0.61039	1	-0.33693	0.46354	0.73307	-7.2284	0.99201	1	14	4.204	0.65235	1	9	5.7553	0.22677	0.52203
(6Z,9Z,12Z,15Z,18Z,21Z)-THA	32	0.33693	0.61039	1	-0.33693	0.46354	0.73307	-7.2284	0.99201	1	14	4.204	0.65235	1	9	5.7553	0.22677	0.52203
(7Z)-octadecenoic acid	32	0.33693	0.61039	1	-0.33693	0.46354	0.73307	-7.2284	0.99201	1	14	4.204	0.65235	1	9	5.7553	0.22677	0.52203
(7Z)-tetradecenoic acid	32	0.33693	0.61039	1	-0.33693	0.46354	0.73307	-7.2284	0.99201	1	14	4.204	0.65235	1	9	5.7553	0.22677	0.52203
(9E)-tetradecenoic acid	33	0.31857	0.60539	1	-0.31857	0.45554	0.73307	-7.415	0.997	1	14	4.204	0.65235	1	10	4.9206	0.35065	0.64703
(9Z,12Z,15Z,18Z)-TTA	32	0.33693	0.61039	1	-0.33693	0.46354	0.73307	-7.2284	0.99201	1	14	4.204	0.65235	1	9	5.7553	0.22677	0.52203
(9Z,12Z,15Z,18Z,21Z)-TPA	32	0.33693	0.61039	1	-0.33693	0.46354	0.73307	-7.2284	0.99201	1	14	4.204	0.65235	1	9	5.7553	0.22677	0.52203
1-acyl-PE pool	50	1.988	0.41459	1	0.33156	0.37562	0.73307	1.0686	0.67732	1	26	6.7289	0.6024	1	17	7.4487	0.16484	0.52203
1-phosphatidyl-1D-myo-inositol-5-phosphate	44	-0.43697	0.72428	1	0.43697	0.36264	0.73307	5.0679	0.24376	0.66327	22	5.5984	0.65135	1	19	7.3382	0.25275	0.53912
10,13,16,19-docosatetraenoic acid	32	0.33693	0.61039	1	-0.33693	0.46354	0.73307	-7.2284	0.99201	1	14	4.204	0.65235	1	9	5.7553	0.22677	0.52203
10,13,16-docosatriynoic acid	32	0.33693	0.61039	1	-0.33693	0.46354	0.73307	-7.2284	0.99201	1	14	4.204	0.65235	1	9	5.7553	0.22677	0.52203
11,12-EET	55	2.405	0.3956	1	-0.51934	0.47053	0.73307	-2.1987	0.9041	1	28	4.7137	0.9001	1	20	3.6266	0.86314	0.97171
12,15,18,21-tetracosatetraenoic acid	32	0.33693	0.61039	1	-0.33693	0.46354	0.73307	-7.2284	0.99201	1	14	4.204	0.65235	1	9	5.7553	0.22677	0.52203
13,16,19-docosatrienoic acid	32	0.33693	0.61039	1	-0.33693	0.46354	0.73307	-7.2284	0.99201	1	14	4.204	0.65235	1	9	5.7553	0.22677	0.52203
14,15-EET	55	2.405	0.3956	1	-0.51934	0.47053	0.73307	-2.1987	0.9041	1	28	4.7137	0.9001	1	20	3.6266	0.86314	0.97171
2-lysolecithin pool	52	1.756	0.45554	1	0.53701	0.36963	0.73307	0.04435	0.78322	1	26	6.7289	0.6024	1	18	7.4683	0.23377	0.52768
4-(methylnitrosamino)-1-(3-pyridyl)-1-butanol	27	-0.46895	0.6953	1	0.46895	0.37662	0.73307	-24.177	1	1	7	-1.281	0.99301	1	5	0.40443	0.88611	0.98686
4-(n-nitrosomethylamino)-1-(3-pyridyl)-1-butanone	24	0.28582	0.63137	1	-0.28582	0.43157	0.73307	-4.7184	0.94605	1	12	-0.13752	0.99101	1	9	0.66319	0.95105	0.99121
7-palmitoleic acid	32	0.33693	0.61039	1	-0.33693	0.46354	0.73307	-7.2284	0.99201	1	14	4.204	0.65235	1	9	5.7553	0.22677	0.52203
8,11-eicosadienoic acid	32	0.33693	0.61039	1	-0.33693	0.46354	0.73307	-7.2284	0.99201	1	14	4.204	0.65235	1	9	5.7553	0.22677	0.52203
9-eicosenoic acid	32	0.33693	0.61039	1	-0.33693	0.46354	0.73307	-7.2284	0.99201	1	14	4.204	0.65235	1	9	5.7553	0.22677	0.52203
9-heptadecylenic acid	32	0.33693	0.61039	1	-0.33693	0.46354	0.73307	-7.2284	0.99201	1	14	4.204	0.65235	1	9	5.7553	0.22677	0.52203
D-galactosyl-N-acylsphingosine	63	1.0469	0.6004	1	-0.6407	0.46653	0.73307	6.7418	0.17982	0.60592	32	7.6546	0.62737	1	28	6.584	0.56743	0.896
D-lactaldehyde	21	0.25624	0.57343	1	-0.25624	0.47453	0.73307	-1.2011	0.78122	1	12	1.0614	0.95804	1	7	2.7358	0.61439	0.91328
DHA	32	0.33693	0.61039	1	-0.33693	0.46354	0.73307	-7.2284	0.99201	1	14	4.204	0.65235	1	9	5.7553	0.22677	0.52203
DPA	32	0.33693	0.61039	1	-0.33693	0.46354	0.73307	-7.2284	0.99201	1	14	4.204	0.65235	1	9	5.7553	0.22677	0.52203
GSH	80	1.2986	0.59041	1	0.27803	0.36364	0.73307	0.70531	0.75225	1	35	9.2903	0.43856	1	34	7.1431	0.64835	0.91328
L-carnitine	33	-0.61363	0.74026	1	0.61364	0.33467	0.73307	9.2801	0.038961	0.22933	19	6.0658	0.56843	1	13	9.7293	0.031968	0.33784
L-lactate	27	-0.80844	0.73227	1	0.80844	0.34066	0.73307	1.5203	0.56144	1	17	0.062227	0.995	1	9	5.2842	0.29071	0.58774
LacCer pool	67	0.50468	0.66533	1	-0.50468	0.47453	0.73307	5.4255	0.27473	0.66883	36	5.7806	0.87912	1	28	6.4923	0.58541	0.91328
NH4+	49	2.1467	0.42058	1	-0.046997	0.41658	0.73307	1.1833	0.65335	1	27	5.9059	0.75225	1	16	6.7132	0.26274	0.55492
TAG-LD pool	35	3.1137	0.26174	1	0.027222	0.40759	0.73307	-3.4645	0.92108	1	19	4.9154	0.71129	1	9	5.1816	0.3047	0.6107
UDP-galactose	68	-0.59607	0.77822	1	0.59607	0.34266	0.73307	5.7237	0.22478	0.66327	33	5.4329	0.89011	1	33	5.6415	0.81419	0.94619
acetaldehyde	23	-0.51333	0.7023	1	0.51333	0.35664	0.73307	-5.731	0.97502	1	13	-0.94268	0.999	1	6	3.573	0.42857	0.74084
acyl-CoA pool	35	1.8052	0.43357	1	-0.35987	0.45854	0.73307	12.15	0.008991	0.095019	17	10.188	0.07992	1	18	7.0418	0.28671	0.58219
adrenic acid	32	0.33693	0.61039	1	-0.33693	0.46354	0.73307	-7.2284	0.99201	1	14	4.204	0.65235	1	9	5.7553	0.22677	0.52203
arginine	49	4.808	0.15285	1	-0.14488	0.42957	0.73307	13.43	0.001998	0.04223	26	13.385	0.032967	0.66651	21	9.2051	0.10789	0.45198
behenic acid	35	-0.032444	0.69131	1	0.032444	0.4046	0.73307	-6.6522	0.99201	1	15	4.0839	0.72727	1	11	5.6425	0.27273	0.56364
bilirubin	23	0.30723	0.58841	1	-0.30723	0.46653	0.73307	-22.713	1	1	5	1.3445	0.76623	1	4	1.4993	0.66833	0.91328
cerotic acid	32	0.33693	0.61039	1	-0.33693	0.46354	0.73307	-7.2284	0.99201	1	14	4.204	0.65235	1	9	5.7553	0.22677	0.52203
cis-cetoleic acid	32	0.33693	0.61039	1	-0.33693	0.46354	0.73307	-7.2284	0.99201	1	14	4.204	0.65235	1	9	5.7553	0.22677	0.52203
cis-erucic acid	33	-0.0090503	0.65634	1	0.0090503	0.41658	0.73307	-6.8918	0.99201	1	14	4.204	0.65235	1	10	5.871	0.22478	0.52203
cis-gondoic acid	33	-0.0090503	0.65634	1	0.0090503	0.41658	0.73307	-6.8918	0.99201	1	14	4.204	0.65235	1	10	5.871	0.22478	0.52203
cis-vaccenic acid	33	-0.0090503	0.65634	1	0.0090503	0.41658	0.73307	-6.8918	0.99201	1	14	4.204	0.65235	1	10	5.871	0.22478	0.52203
dGTP	44	0.17639	0.65634	1	-0.17764	0.43956	0.73307	12.36	0.005994	0.073348	22	9.5793	0.15085	1	21	9.8777	0.063936	0.40586
digalactosylceramide	53	0.14169	0.69231	1	-0.14169	0.41758	0.73307	6.3968	0.14486	0.52623	27	5.5936	0.79421	1	25	5.1427	0.74525	0.94619
dolichyl-phosphate	21	0.25361	0.57443	1	-0.25361	0.47353	0.73307	4.9359	0.19081	0.62483	10	4.0483	0.55644	1	11	2.96	0.71229	0.93038
eicosanoate	33	-0.067423	0.66034	1	0.067423	0.40959	0.73307	-6.8344	0.99201	1	14	4.204	0.65235	1	10	5.9752	0.21279	0.52203
elaidate	32	0.33693	0.61039	1	-0.33693	0.46354	0.73307	-7.2284	0.99201	1	14	4.204	0.65235	1	9	5.7553	0.22677	0.52203
fructose-6-phosphate	26	0.2698	0.61938	1	0.28765	0.39261	0.73307	9.5206	0.023976	0.1664	10	9.6535	0.05994	1	15	6.7721	0.23976	0.534
gamma-linolenate	32	0.33693	0.61039	1	-0.33693	0.46354	0.73307	-7.2284	0.99201	1	14	4.204	0.65235	1	9	5.7553	0.22677	0.52203
glycerol	28	-0.24755	0.70529	1	0.24755	0.35964	0.73307	-4.0215	0.94306	1	16	0.24207	0.995	1	8	3.7441	0.5035	0.82766
glycine	98	4.868	0.17782	1	-0.14728	0.41259	0.73307	14.985	0.001998	0.04223	53	15.786	0.038961	0.72468	38	14.744	0.006993	0.16259
henicosanoic acid	32	0.33693	0.61039	1	-0.33693	0.46354	0.73307	-7.2284	0.99201	1	14	4.204	0.65235	1	9	5.7553	0.22677	0.52203
hexacosenoyl-CoA	30	-0.57823	0.71728	1	0.57823	0.36663	0.73307	-0.49446	0.75924	1	14	2.2469	0.88012	1	13	3.7479	0.68132	0.91328
lauroyl-CoA	43	-0.58187	0.76923	1	0.58187	0.34066	0.73307	4.8044	0.29371	0.70399	21	4.607	0.7972	1	20	5.9952	0.48651	0.80796
lignocerate	33	-0.067423	0.66034	1	0.067423	0.40959	0.73307	-6.8344	0.99201	1	14	4.204	0.65235	1	10	5.9752	0.21279	0.52203
linolenate	32	0.33693	0.61039	1	-0.33693	0.46354	0.73307	-7.2284	0.99201	1	14	4.204	0.65235	1	9	5.7553	0.22677	0.52203
lysine	43	5.4037	0.080919	1	-0.41097	0.45554	0.73307	14.966	0.002997	0.048055	23	14.929	0.008991	0.28388	18	10.126	0.026973	0.3216
mead acid	32	0.33693	0.61039	1	-0.33693	0.46354	0.73307	-7.2284	0.99201	1	14	4.204	0.65235	1	9	5.7553	0.22677	0.52203
nervonic acid	33	-0.0090503	0.65634	1	0.0090503	0.41658	0.73307	-6.8918	0.99201	1	14	4.204	0.65235	1	10	5.871	0.22478	0.52203
nicotinamide	27	3.0668	0.23576	1	-0.30668	0.47353	0.73307	11.116	0.00999	0.098837	15	10.251	0.05994	1	11	7.9205	0.067932	0.40586
nonadecylic acid	32	0.33693	0.61039	1	-0.33693	0.46354	0.73307	-7.2284	0.99201	1	14	4.204	0.65235	1	9	5.7553	0.22677	0.52203
oleate	33	0.31857	0.60539	1	-0.31857	0.45554	0.73307	-7.415	0.997	1	14	4.204	0.65235	1	10	4.9206	0.35065	0.64703
omega-3-arachidonic acid	32	0.33693	0.61039	1	-0.33693	0.46354	0.73307	-7.2284	0.99201	1	14	4.204	0.65235	1	9	5.7553	0.22677	0.52203
palmitolate	33	0.31857	0.60539	1	-0.31857	0.45554	0.73307	-7.415	0.997	1	14	4.204	0.65235	1	10	4.9206	0.35065	0.64703
phenylalanine	57	4.7196	0.12288	1	-0.32838	0.46354	0.73307	13.774	0.004995	0.072584	30	15.076	0.00999	0.28388	23	11.312	0.023976	0.30969
phosphatidate-LD-PE pool	24	0.30486	0.63137	1	-0.30486	0.43157	0.73307	8.3782	0.033966	0.20782	15	4.8865	0.61239	1	9	7.3731	0.07992	0.40586
phosphatidate-LD-PS pool	24	0.30486	0.63137	1	-0.30486	0.43157	0.73307	8.3782	0.033966	0.20782	15	4.8865	0.61239	1	9	7.3731	0.07992	0.40586
phosphatidate-LD-TAG pool	30	-0.7235	0.73227	1	0.7235	0.35065	0.73307	8.0336	0.04995	0.26097	17	5.1894	0.58042	1	12	8.8954	0.057942	0.40586
physeteric acid	32	0.33693	0.61039	1	-0.33693	0.46354	0.73307	-7.2284	0.99201	1	14	4.204	0.65235	1	9	5.7553	0.22677	0.52203
stearate	34	-0.077104	0.64336	1	0.077104	0.43956	0.73307	-7.0257	0.995	1	14	4.204	0.65235	1	11	5.1829	0.34166	0.64703
stearidonic acid	33	-0.0090503	0.65634	1	0.0090503	0.41658	0.73307	-6.8918	0.99201	1	14	4.204	0.65235	1	10	5.871	0.22478	0.52203
succinate	31	2.3869	0.36364	1	0.039033	0.38961	0.73307	14.452	0.002997	0.048055	13	15.34	0.002997	0.28388	16	10.394	0.026973	0.3216
thiol	53	0.57775	0.62937	1	-0.36009	0.45055	0.73307	6.6223	0.13287	0.50608	24	8.5682	0.29271	1	25	7.8148	0.33267	0.64232
tricosanoic acid	32	0.33693	0.61039	1	-0.33693	0.46354	0.73307	-7.2284	0.99201	1	14	4.204	0.65235	1	9	5.7553	0.22677	0.52203
tyrosine	55	6.2075	0.065934	1	0.56412	0.35564	0.73307	16.447	0.001998	0.04223	30	16.941	0.002997	0.28388	21	13.535	0.001998	0.092907
ubiquitin C terminal thiolester	53	0.57775	0.62937	1	-0.36009	0.45055	0.73307	6.6223	0.13287	0.50608	24	8.5682	0.29271	1	25	7.8148	0.33267	0.64232
uridine	23	0.024718	0.61638	1	-0.024718	0.43656	0.73307	4.6206	0.22777	0.66327	15	1.9062	0.94006	1	8	5.2245	0.26374	0.55492
ximenic acid	32	0.33693	0.61039	1	-0.33693	0.46354	0.73307	-7.2284	0.99201	1	14	4.204	0.65235	1	9	5.7553	0.22677	0.52203
D-lactate	20	0.33862	0.56643	1	-0.33862	0.47852	0.7368	6.1791	0.11988	0.47645	12	3.4809	0.72527	1	8	5.5067	0.22478	0.52203
dTTP	39	0.43018	0.60539	1	-0.4304	0.48551	0.7451	9.5647	0.035964	0.21719	19	8.9735	0.1978	1	18	8.7295	0.093906	0.41987
trichloroethanol	37	0.55154	0.57642	1	-0.55154	0.48851	0.74723	-23.847	1	1	13	-2.3296	1	1	8	-1.8759	0.999	0.999
(9Z,12Z,15Z,18Z)-tetracosatetraenoyl-CoA	33	0.71223	0.56943	1	-0.71223	0.4965	0.75449	0.57712	0.66334	1	17	3.4999	0.81718	1	13	3.7479	0.68132	0.91328
tetracosanoyl-CoA	45	0.52575	0.6044	1	-0.52575	0.4955	0.75449	3.5064	0.40559	0.88545	24	4.6014	0.84615	1	18	6.0359	0.45355	0.7697
phosphatidate-LD-PC pool	25	0.51243	0.57443	1	-0.51243	0.4985	0.75506	8.3224	0.04995	0.26097	16	4.8732	0.64436	1	9	7.3731	0.07992	0.40586
estradiol-17beta 3-glucuronide	24	0.80453	0.56444	1	-0.80453	0.5025	0.75864	-23.678	1	1	6	1.5668	0.75924	1	3	1.9095	0.54845	0.87941
fatty acid-ligands	26	0.73293	0.56444	1	-0.73293	0.51149	0.76972	6.4379	0.13287	0.50608	16	4.8123	0.65634	1	9	7.2625	0.081918	0.40586
ITP	22	0.64114	0.54346	1	-0.64114	0.51748	0.77622	5.2735	0.18482	0.61385	11	6.5442	0.27273	1	9	6.4831	0.15385	0.52203
retinyl-ester	28	0.93734	0.54545	1	-0.93734	0.52148	0.7797	-10.599	1	1	12	0.481	0.98102	1	9	-0.095186	0.97602	0.99196
ubiquitin	230	2.0007	0.67033	1	-1.683	0.52348	0.78018	16.273	0.002997	0.048055	117	17.24	0.3966	1	100	16.704	0.086913	0.41899
decanoyl-CoA	24	0.98601	0.53646	1	-0.98601	0.52647	0.78214	0.8929	0.6014	1	12	3.2309	0.76124	1	10	3.0362	0.68332	0.91328
methionine	58	7.3703	0.02997	1	-0.90804	0.53447	0.79149	17.894	0.000999	0.027326	35	15.84	0.008991	0.28388	21	12.872	0.005994	0.1467
UDP-N-acetylglucosamine	51	1.2413	0.55544	1	-1.2413	0.54046	0.79468	5.7271	0.20779	0.64436	30	4.4856	0.92907	1	20	5.4874	0.57542	0.90396
cytidine	27	0.78887	0.53247	1	-0.78887	0.54246	0.79468	4.2849	0.25874	0.66327	18	2.1817	0.95105	1	9	4.3362	0.42158	0.73147
dGDP	20	0.83545	0.4985	1	-0.83702	0.54346	0.79468	6.8955	0.092907	0.39274	11	6.1355	0.31668	1	8	6.6108	0.12388	0.48002
galactose	27	3.4151	0.2018	1	-0.74844	0.53846	0.79468	4.0416	0.27373	0.66883	16	6.901	0.33966	1	8	6.3729	0.14685	0.52203
[protein]-N-ubiquityllysine	177	1.9619	0.64236	1	-1.7182	0.55245	0.80529	14.927	0.005994	0.073348	93	14.984	0.4006	1	75	14.776	0.11289	0.46454
alpha-CEHC-glucuronide	20	0.95654	0.48352	1	-0.95654	0.55944	0.80539	-24.983	1	1	5	-1.1467	0.97702	1	2	-1.7264	0.97203	0.99121
gamma-CEHC-glucuronide	20	0.95654	0.48352	1	-0.95654	0.55944	0.80539	-24.983	1	1	5	-1.1467	0.97702	1	2	-1.7264	0.97203	0.99121
glucose	65	2.9927	0.32667	1	-1.0891	0.55644	0.80539	3.2977	0.45554	0.93109	33	8.8325	0.46354	1	25	6.6629	0.5045	0.82766
phosphatidylinositol-3,5-bisphosphate	39	0.96583	0.53546	1	-0.96583	0.55544	0.80539	2.9551	0.45754	0.93109	19	5.4036	0.65534	1	17	4.7366	0.63936	0.91328
6-hydroxymelatonin	29	1.2572	0.50949	1	-1.2572	0.57343	0.8222	-3.894	0.92807	1	13	2.5511	0.86613	1	12	0.77089	0.97003	0.99121
CMP	55	1.2999	0.53646	1	-1.2909	0.57642	0.8222	10.018	0.031968	0.20088	30	8.0008	0.49051	1	24	7.8957	0.26973	0.55993
dCMP	22	1.0132	0.47752	1	-1.0132	0.57642	0.8222	7.2202	0.071928	0.34481	12	5.2792	0.44555	1	10	4.9262	0.34965	0.64703
1-phosphatidyl-1D-myo-inositol-3-phosphate	43	1.2662	0.52448	1	-1.2662	0.58342	0.82772	2.4758	0.52048	0.98549	20	6.287	0.53447	1	19	4.8077	0.66833	0.91328
fatty acid pool	77	3.4939	0.28472	1	-1.519	0.58641	0.82772	-2.271	0.91009	1	40	6.7746	0.84515	1	26	5.3992	0.73926	0.94619
hexacosanoyl-CoA	34	1.1977	0.47552	1	-1.1977	0.58741	0.82772	1.003	0.65135	1	18	3.9985	0.80819	1	13	3.7479	0.68132	0.91328
isoleucine	45	6.1823	0.057942	1	-1.2495	0.58541	0.82772	14.898	0.000999	0.027326	25	15.865	0.007992	0.28388	17	10.972	0.015984	0.24678
GMP	57	1.2724	0.51149	1	-1.2726	0.59041	0.82943	6.8499	0.17283	0.59338	28	7.3888	0.55045	1	27	5.5882	0.71029	0.93038
(6Z,9Z,12Z,15Z,18Z)-tetracosapentaenoyl-CoA	32	1.298	0.48651	1	-1.298	0.59241	0.82973	2.5578	0.46054	0.93109	18	3.9985	0.80819	1	12	4.0195	0.5994	0.91328
HCO3-	52	1.868	0.44056	1	-1.4599	0.5964	0.83032	8.1757	0.082917	0.38556	24	9.4792	0.1978	1	26	5.6749	0.69031	0.91328
NH3	64	3.5642	0.25874	1	-1.4488	0.5964	0.83032	10.64	0.025974	0.17504	33	12.136	0.11588	1	27	9.2844	0.15185	0.52203
EPA	36	1.6801	0.47153	1	-1.6801	0.61039	0.84726	-6.0137	0.98801	1	18	4.8407	0.6983	1	9	5.7553	0.22677	0.52203
dihomo-gamma-linolenate	36	1.7065	0.46853	1	-1.7065	0.61339	0.84888	-5.9705	0.98801	1	18	4.9018	0.69131	1	9	5.7553	0.22677	0.52203
4-methyl-2-oxopentanoate	34	1.3669	0.44755	1	-1.3669	0.61538	0.84912	1.6133	0.58741	1	17	4.1826	0.72827	1	15	2.2156	0.91109	0.99121
1-(1-alkenyl)-sn-glycero-3-phosphoethanolamine	27	1.5176	0.41658	1	-1.4783	0.63736	0.85187	3.2052	0.36364	0.81294	15	4.4794	0.67632	1	10	4.9726	0.34366	0.64703
12,13-hydroxyoctadec-9(z)-enoate	20	1.3346	0.42058	1	-1.3346	0.62737	0.85187	-26.283	1	1	4	-0.084125	0.9031	1	2	-1.7264	0.97203	0.99121
9,10-hydroxyoctadec-12(Z)-enoate	20	1.3346	0.42058	1	-1.3346	0.62737	0.85187	-26.283	1	1	4	-0.084125	0.9031	1	2	-1.7264	0.97203	0.99121
bilirubin-bisglucuronoside	22	1.5532	0.41059	1	-1.5532	0.62937	0.85187	-24.513	1	1	5	0.61729	0.85814	1	3	-0.82105	0.94206	0.99121
heptylic acid	20	1.4181	0.41159	1	-1.4181	0.63636	0.85187	-13.337	1	1	8	2.6246	0.69131	1	3	3.9359	0.21778	0.52203
hexanoic acid	20	1.4181	0.41159	1	-1.4181	0.63636	0.85187	-13.337	1	1	8	2.6246	0.69131	1	3	3.9359	0.21778	0.52203
nonanoic acid	20	1.4181	0.41159	1	-1.4181	0.63636	0.85187	-13.337	1	1	8	2.6246	0.69131	1	3	3.9359	0.21778	0.52203
octanoic acid	20	1.4181	0.41159	1	-1.4181	0.63636	0.85187	-13.337	1	1	8	2.6246	0.69131	1	3	3.9359	0.21778	0.52203
retinal	24	4.3216	0.16883	1	-1.8991	0.63936	0.85187	-0.91742	0.76424	1	11	6.2232	0.30569	1	10	-0.15991	0.98302	0.9937
succinyl-CoA	23	1.6213	0.42158	1	-1.6213	0.63836	0.85187	5.9812	0.12987	0.50608	12	5.9429	0.34865	1	10	5.1568	0.31668	0.62594
undecylic acid	20	1.4181	0.41159	1	-1.4181	0.63636	0.85187	-13.337	1	1	8	2.6246	0.69131	1	3	3.9359	0.21778	0.52203
valeric acid	20	1.4181	0.41159	1	-1.4181	0.63636	0.85187	-13.337	1	1	8	2.6246	0.69131	1	3	3.9359	0.21778	0.52203
3-oxopropionyl-CoA	26	1.7286	0.40659	1	-1.7286	0.65235	0.85932	2.6035	0.44056	0.91455	14	3.852	0.7033	1	11	2.1323	0.82517	0.94619
3alpha,7alpha,12alpha,25-tetrahydroxy-5beta-cholestane-24-one	26	1.7286	0.40659	1	-1.7286	0.65235	0.85932	2.6035	0.44056	0.91455	14	3.852	0.7033	1	11	2.1323	0.82517	0.94619
9-cis-4-oxo-13,14-dihydro-retinoate	26	1.7286	0.40659	1	-1.7286	0.65235	0.85932	2.6035	0.44056	0.91455	14	3.852	0.7033	1	11	2.1323	0.82517	0.94619
alpha-hydroxyisocaproic acid	26	1.7286	0.40659	1	-1.7286	0.65235	0.85932	2.6035	0.44056	0.91455	14	3.852	0.7033	1	11	2.1323	0.82517	0.94619
PAP	55	2.0871	0.43457	1	-2.0871	0.65435	0.85952	-1.088	0.84216	1	28	4.3304	0.92707	1	22	2.1458	0.97702	0.99196
glucosylceramide pool	61	2.038	0.45255	1	-2.038	0.66034	0.86495	7.3024	0.14186	0.52623	34	7.0585	0.74525	1	26	4.7235	0.83816	0.95526
decanoic acid	23	1.899	0.39461	1	-1.899	0.66234	0.86513	-12.049	1	1	10	2.9934	0.72827	1	4	3.3179	0.37263	0.66566
13,14-dihydro-15-oxo-lipoxin A4	27	1.7286	0.38062	1	-1.7286	0.67433	0.87343	0.97492	0.62138	1	14	3.852	0.7033	1	11	2.1323	0.82517	0.94619
15-oxo-lipoxin A4	27	1.7286	0.38062	1	-1.7286	0.67433	0.87343	0.97492	0.62138	1	14	3.852	0.7033	1	11	2.1323	0.82517	0.94619
6-hydroxymelatonin-sulfate	25	1.8092	0.38661	1	-1.8092	0.67233	0.87343	-3.915	0.94006	1	12	3.0467	0.78921	1	9	0.90304	0.92707	0.99121
CDP	61	2.1789	0.43057	1	-2.1703	0.67732	0.87488	12.104	0.011988	0.10518	35	10.345	0.28971	1	24	10.156	0.063936	0.40586
tryptophan	47	7.0708	0.027972	1	-2.1956	0.68032	0.87631	12.926	0.005994	0.073348	26	16	0.007992	0.28388	17	9.6689	0.036963	0.3657
1-phosphatidyl-1D-myo-inositol-3,4-bisphosphate	41	2.068	0.40659	1	-2.068	0.68531	0.88031	2.6465	0.51349	0.98549	20	6.8617	0.44456	1	17	4.6318	0.65335	0.91328
butyrate	28	2.3849	0.36763	1	-2.3849	0.69131	0.88556	-10.353	1	1	14	2.8039	0.82218	1	5	3.8518	0.33766	0.6435
reverse triiodthyronine	27	2.8409	0.25475	1	-1.8753	0.6953	0.88823	-20.328	1	1	7	4.7918	0.33566	1	5	2.1636	0.61139	0.91328
3,5-diiodo-L-thyronine	23	3.2458	0.23077	1	-2.1881	0.7003	0.8912	-20.909	1	1	6	3.005	0.53347	1	4	-0.45543	0.93506	0.99121
5beta-cholestane-3alpha,7alpha,12alpha,24s,25-pentol	30	2.192	0.35764	1	-2.192	0.7043	0.8912	3.1957	0.4026	0.88306	16	4.5426	0.68731	1	13	2.092	0.9001	0.99121
butyryl-CoA	47	2.3716	0.38362	1	-2.3716	0.7023	0.8912	6.162	0.18881	0.62268	28	6.9314	0.62138	1	16	7.549	0.16384	0.52203
valine	44	7.0416	0.032967	1	-2.1088	0.70529	0.8912	15.436	0.002997	0.048055	25	15.865	0.007992	0.28388	17	9.5765	0.038961	0.36973
dGMP	20	2.033	0.34565	1	-2.033	0.70729	0.8913	6.97	0.087912	0.38932	12	5.4258	0.42957	1	8	4.3753	0.38661	0.68616
phosphatidylinositol-3,4,5-trisphosphate	47	2.4202	0.37762	1	-2.4202	0.70929	0.89141	5.0109	0.28571	0.69196	25	7.2436	0.51449	1	19	5.2223	0.61139	0.91328
proline	57	4.8201	0.11489	1	-2.2234	0.72028	0.90035	13.5	0.004995	0.072584	29	15.257	0.010989	0.28388	24	10.736	0.043956	0.37851
thymidine	20	2.1445	0.33067	1	-2.146	0.72028	0.90035	7.8081	0.053946	0.27771	13	5.6422	0.44156	1	7	5.509	0.18082	0.52203
PAPS	57	2.2734	0.37762	1	-2.2734	0.72627	0.90313	-0.77873	0.83816	1	29	4.6426	0.89411	1	23	2.12	0.98302	0.9937
dTMP	23	2.3943	0.32967	1	-2.3958	0.72727	0.90313	6.4321	0.10589	0.42818	12	7.022	0.22378	1	10	4.6586	0.39261	0.69152
hexanoyl-CoA	27	2.1802	0.31868	1	-2.1802	0.73027	0.90313	1.3652	0.57343	1	15	3.8066	0.76623	1	10	2.7733	0.72827	0.94619
nicotinate ribonucleotide	21	2.2704	0.31668	1	-2.2704	0.72927	0.90313	2.0657	0.46553	0.93508	13	4.5305	0.61339	1	6	3.8989	0.36863	0.66566
retinol	50	4.4172	0.16683	1	-2.6619	0.74226	0.91552	-7.1517	0.98801	1	23	5.7649	0.65834	1	17	0.94038	0.99201	0.999
H2O2	100	4.835	0.21079	1	-3.1534	0.74426	0.91555	11.422	0.028971	0.19245	57	11.986	0.38861	1	38	10.507	0.18681	0.52203
(1R,2S)-naphthalene 1,2-oxide	28	4.5879	0.15385	1	-4.5812	0.88711	0.91779	-3.3246	0.91309	1	14	5.7811	0.42957	1	9	0.6082	0.95105	0.99121
(1S,2R)-naphthalene 1,2-oxide	28	4.5879	0.15385	1	-4.5812	0.88711	0.91779	-3.3246	0.91309	1	14	5.7811	0.42957	1	9	0.6082	0.95105	0.99121
1,1-dichloroethylene epoxide	27	4.1056	0.14386	1	-4.0988	0.89411	0.91779	-3.8687	0.94006	1	13	5.3032	0.49151	1	9	0.6082	0.95105	0.99121
1-nitronaphthalene-5,6-oxide	28	4.5879	0.15385	1	-4.5812	0.88711	0.91779	-3.3246	0.91309	1	14	5.7811	0.42957	1	9	0.6082	0.95105	0.99121
1-nitronaphthalene-7,8-oxide	27	4.1056	0.14386	1	-4.0988	0.89411	0.91779	-3.8687	0.94006	1	13	5.3032	0.49151	1	9	0.6082	0.95105	0.99121
1-phosphatidyl-myo-inositol-3,5-bisphosphate	29	2.8563	0.3027	1	-2.8563	0.76024	0.91779	1.1907	0.60539	1	15	5.7233	0.47852	1	11	2.6758	0.76224	0.94619
10,11-epoxy-(4Z,7Z)-hexadecadienoic acid	24	4.2075	0.17383	1	-4.2075	0.88012	0.91779	4.4272	0.25075	0.66327	14	6.4495	0.32567	1	9	1.9221	0.82817	0.94619
11-carboxy-alpha-chromanol	24	4.2075	0.17383	1	-4.2075	0.88012	0.91779	4.4272	0.25075	0.66327	14	6.4495	0.32567	1	9	1.9221	0.82817	0.94619
11-carboxy-alpha-tocotrienol	28	4.4254	0.16084	1	-4.4254	0.87912	0.91779	4.6865	0.26474	0.66327	17	6.382	0.40559	1	10	2.117	0.82218	0.94619
11-carboxy-gamma-chromanol	24	4.2075	0.17383	1	-4.2075	0.88012	0.91779	4.4272	0.25075	0.66327	14	6.4495	0.32567	1	9	1.9221	0.82817	0.94619
11-carboxy-gamma-tocotrienol	28	4.4254	0.16084	1	-4.4254	0.87912	0.91779	4.6865	0.26474	0.66327	17	6.382	0.40559	1	10	2.117	0.82218	0.94619
12,13-epoxy-(6Z,9Z)-octadecadienoic acid	24	4.2075	0.17383	1	-4.2075	0.88012	0.91779	4.4272	0.25075	0.66327	14	6.4495	0.32567	1	9	1.9221	0.82817	0.94619
12-oxo-c-LTB3	23	3.6845	0.18881	1	-3.6769	0.85215	0.91779	-3.4997	0.92008	1	10	6.2756	0.26973	1	8	1.5621	0.84416	0.95974
13-carboxy-alpha-tocotrienol	29	4.3847	0.15485	1	-4.3847	0.89211	0.91779	4.1494	0.31069	0.72965	17	6.2803	0.41658	1	11	1.4051	0.91608	0.99121
13-cis-retinoate	21	3.4853	0.1988	1	-3.4853	0.85814	0.91779	-22.775	1	1	5	2.821	0.55345	1	3	-2.281	0.999	0.999
2,2-dichloroacetaldehyde	27	4.1056	0.14386	1	-4.0988	0.89411	0.91779	-3.8687	0.94006	1	13	5.3032	0.49151	1	9	0.6082	0.95105	0.99121
3,3-diiodo-L-thyronine	46	3.4855	0.23576	1	-2.8644	0.77522	0.91779	-17.885	1	1	18	3.7646	0.82318	1	11	0.69064	0.95704	0.99121
3,3-diiodo-L-thyronine-4-O-sulfate	25	4.5676	0.11189	1	-3.8377	0.87313	0.91779	-1.7342	0.82917	1	13	6.1152	0.38162	1	8	0.749	0.90609	0.99121
3-carboxy-alpha-chromanol	44	4.1461	0.16983	1	-4.1461	0.87512	0.91779	-13.574	1	1	19	4.948	0.70929	1	11	1.0025	0.94006	0.99121
3-hydroxykynurenine-O-beta-D-glucoside	20	3.9956	0.15085	1	-3.987	0.88911	0.91779	-5.3295	0.97103	1	7	7.9647	0.087912	1	7	1.6444	0.81119	0.94619
3-hydroxypropionyl-CoA	30	2.6125	0.30869	1	-2.6125	0.75425	0.91779	4.1385	0.30669	0.72392	17	5.2281	0.57542	1	12	2.6908	0.81718	0.94619
4-hydroxy-all-trans-retinoate	20	3.1741	0.22577	1	-3.174	0.82018	0.91779	-23.519	1	1	5	1.7819	0.71029	1	2	-1.7264	0.97203	0.99121
4-oxo-9-cis-retinoate	45	3.0178	0.28671	1	-3.0178	0.78222	0.91779	-13.569	1	1	18	4.5445	0.73626	1	13	1.2843	0.95604	0.99121
5,6-epoxy-(8Z)-tetradecenoic acid	24	4.2075	0.17383	1	-4.2075	0.88012	0.91779	4.4272	0.25075	0.66327	14	6.4495	0.32567	1	9	1.9221	0.82817	0.94619
5-S-glutathionyl-L-dopa	22	3.323	0.22178	1	-3.3152	0.81319	0.91779	-2.2027	0.85015	1	8	8.2399	0.091908	1	9	2.4701	0.73327	0.94619
5-S-glutathionyl-dopamine	21	2.8027	0.26274	1	-2.7946	0.78022	0.91779	-2.7419	0.88012	1	7	7.9647	0.087912	1	9	2.4701	0.73327	0.94619
5-carboxy-alpha-chromanol	28	4.4254	0.16084	1	-4.4254	0.87912	0.91779	4.6865	0.26474	0.66327	17	6.382	0.40559	1	10	2.117	0.82218	0.94619
5-carboxy-gamma-chromanol	28	4.4254	0.16084	1	-4.4254	0.87912	0.91779	4.6865	0.26474	0.66327	17	6.382	0.40559	1	10	2.117	0.82218	0.94619
7,8-epoxy-(4Z,10Z)-hexadecadienoic acid	24	4.2075	0.17383	1	-4.2075	0.88012	0.91779	4.4272	0.25075	0.66327	14	6.4495	0.32567	1	9	1.9221	0.82817	0.94619
7-carboxy-alpha-chromanol	24	4.2075	0.17383	1	-4.2075	0.88012	0.91779	4.4272	0.25075	0.66327	14	6.4495	0.32567	1	9	1.9221	0.82817	0.94619
7-carboxy-alpha-tocotrienol	28	4.4254	0.16084	1	-4.4254	0.87912	0.91779	4.6865	0.26474	0.66327	17	6.382	0.40559	1	10	2.117	0.82218	0.94619
7-carboxy-gamma-chromanol	24	4.2075	0.17383	1	-4.2075	0.88012	0.91779	4.4272	0.25075	0.66327	14	6.4495	0.32567	1	9	1.9221	0.82817	0.94619
7-carboxy-gamma-tocotrienol	28	4.4254	0.16084	1	-4.4254	0.87912	0.91779	4.6865	0.26474	0.66327	17	6.382	0.40559	1	10	2.117	0.82218	0.94619
8,9-epoxy-(5Z)-tetradecenoic acid	24	4.2075	0.17383	1	-4.2075	0.88012	0.91779	4.4272	0.25075	0.66327	14	6.4495	0.32567	1	9	1.9221	0.82817	0.94619
9,10-epoxy-(6Z,12Z)-octadecadienoic acid	24	4.2075	0.17383	1	-4.2075	0.88012	0.91779	4.4272	0.25075	0.66327	14	6.4495	0.32567	1	9	1.9221	0.82817	0.94619
9-carboxy-alpha-chromanol	24	4.2075	0.17383	1	-4.2075	0.88012	0.91779	4.4272	0.25075	0.66327	14	6.4495	0.32567	1	9	1.9221	0.82817	0.94619
9-carboxy-alpha-tocotrienol	28	4.4254	0.16084	1	-4.4254	0.87912	0.91779	4.6865	0.26474	0.66327	17	6.382	0.40559	1	10	2.117	0.82218	0.94619
9-carboxy-gamma-chromanol	24	4.2075	0.17383	1	-4.2075	0.88012	0.91779	4.4272	0.25075	0.66327	14	6.4495	0.32567	1	9	1.9221	0.82817	0.94619
9-carboxy-gamma-tocotrienol	28	4.4254	0.16084	1	-4.4254	0.87912	0.91779	4.6865	0.26474	0.66327	17	6.382	0.40559	1	10	2.117	0.82218	0.94619
9-cis-retinoate	21	3.4853	0.1988	1	-3.4853	0.85814	0.91779	-22.775	1	1	5	2.821	0.55345	1	3	-2.281	0.999	0.999
9-deoxy-delta12-PGD2	20	3.9546	0.15385	1	-3.9462	0.88711	0.91779	-3.6205	0.91708	1	8	7.2498	0.15085	1	7	1.6444	0.81119	0.94619
GM2	20	2.4154	0.3007	1	-2.4154	0.74925	0.91779	2.3254	0.42957	0.9121	12	5.0025	0.49151	1	6	3.874	0.37363	0.66566
IMP	31	2.8825	0.28671	1	-2.8841	0.78521	0.91779	7.4611	0.086913	0.3886	17	7.8727	0.24276	1	13	4.7956	0.50549	0.82766
L-dopachrome	22	3.4335	0.21479	1	-3.4257	0.81818	0.91779	-3.9712	0.93506	1	7	7.9647	0.087912	1	10	0.42653	0.96803	0.99121
L-dopaquinone	20	3.8445	0.16284	1	-3.8362	0.87912	0.91779	-3.8656	0.92607	1	7	7.9647	0.087912	1	8	0.95028	0.89011	0.98783
S-(9-deoxy-delta12-PGD2)-glutathione	21	4.2179	0.14585	1	-4.2099	0.89411	0.91779	-3.2766	0.9021	1	9	7.2272	0.16284	1	7	1.6444	0.81119	0.94619
S-(9-deoxy-delta9,12-PGD2)-glutathione	21	4.2179	0.14585	1	-4.2099	0.89411	0.91779	-3.2766	0.9021	1	9	7.2272	0.16284	1	7	1.6444	0.81119	0.94619
S-(PGA1)-glutathione	20	3.9546	0.15385	1	-3.9462	0.88711	0.91779	-3.6205	0.91708	1	8	7.2498	0.15085	1	7	1.6444	0.81119	0.94619
S-(PGA2)-glutathione	20	3.9546	0.15385	1	-3.9462	0.88711	0.91779	-3.6205	0.91708	1	8	7.2498	0.15085	1	7	1.6444	0.81119	0.94619
S-(PGJ2)-glutathione	21	4.2179	0.14585	1	-4.2099	0.89411	0.91779	-3.2766	0.9021	1	9	7.2272	0.16284	1	7	1.6444	0.81119	0.94619
Tn-antigen	29	2.9418	0.29371	1	-2.9418	0.77023	0.91779	2.0558	0.52248	0.98549	18	3.2638	0.88212	1	10	1.7182	0.86513	0.97171
UDP	222	3.7564	0.41459	1	-3.7517	0.80619	0.91779	3.3089	0.72428	1	121	11.768	0.95804	1	79	11.303	0.61139	0.91328
UDP-N-acetyl-D-galactosamine	32	2.7188	0.28272	1	-2.7188	0.77323	0.91779	0.37196	0.68731	1	21	3.3371	0.91409	1	8	4.0448	0.44555	0.76734
UDP-glucuronate	36	3.2824	0.25874	1	-3.2824	0.80519	0.91779	-17.186	1	1	18	1.9978	0.96304	1	4	1.6709	0.63037	0.91328
UMP	41	3.0259	0.28272	1	-3.0155	0.78721	0.91779	8.4817	0.060939	0.3047	25	7.7026	0.44655	1	15	6.1982	0.31768	0.62594
[protein]-L-serine	28	4.4675	0.15984	1	-4.4675	0.88312	0.91779	2.5586	0.45355	0.93109	18	5.3992	0.62338	1	8	2.4929	0.71029	0.93038
adrenochrome	20	3.8225	0.16384	1	-3.8142	0.87912	0.91779	-3.7611	0.92208	1	7	7.9647	0.087912	1	8	1.1154	0.88312	0.98686
aflatoxin B1-exo-8,9-epoxide	28	4.5879	0.15385	1	-4.5812	0.88711	0.91779	-3.3246	0.91309	1	14	5.7811	0.42957	1	9	0.6082	0.95105	0.99121
aspartate	50	5.7778	0.072927	1	-2.9596	0.77323	0.91779	12.501	0.004995	0.072584	28	14.52	0.016983	0.37605	17	12.76	0.002997	0.092907
benzo[a]pyrene-7,8-diol	28	4.5879	0.15385	1	-4.5812	0.88711	0.91779	-3.3246	0.91309	1	14	5.7811	0.42957	1	9	0.6082	0.95105	0.99121
bromobenzene-2,3-oxide	28	4.5879	0.15385	1	-4.5812	0.88711	0.91779	-3.3246	0.91309	1	14	5.7811	0.42957	1	9	0.6082	0.95105	0.99121
bromobenzene-3,4-oxide	28	4.5879	0.15385	1	-4.5812	0.88711	0.91779	-3.3246	0.91309	1	14	5.7811	0.42957	1	9	0.6082	0.95105	0.99121
chloroacetyl chloride	27	4.1056	0.14386	1	-4.0988	0.89411	0.91779	-3.8687	0.94006	1	13	5.3032	0.49151	1	9	0.6082	0.95105	0.99121
choline	23	3.3245	0.22078	1	-3.3245	0.81818	0.91779	0.93042	0.61039	1	15	3.948	0.75125	1	6	2.2824	0.65934	0.91328
delta-12-prostaglandin J2	20	3.9546	0.15385	1	-3.9462	0.88711	0.91779	-3.6205	0.91708	1	8	7.2498	0.15085	1	7	1.6444	0.81119	0.94619
deoxyadenosine	20	2.6792	0.27273	1	-2.6782	0.77023	0.91779	9.0683	0.021978	0.16222	13	6.7624	0.3017	1	7	6.1126	0.11788	0.47665
gamma-carboxyethyl-hydroxychroman	44	4.1461	0.16983	1	-4.1461	0.87512	0.91779	-13.574	1	1	19	4.948	0.70929	1	11	1.0025	0.94006	0.99121
hepoxilin A3-c	20	3.9546	0.15385	1	-3.9462	0.88711	0.91779	-3.6205	0.91708	1	8	7.2498	0.15085	1	7	1.6444	0.81119	0.94619
histidine	51	7.4505	0.026973	1	-2.8836	0.75025	0.91779	15.115	0.001998	0.04223	29	15.797	0.006993	0.28388	20	8.7851	0.10989	0.45624
noradrenochrome	20	3.8225	0.16384	1	-3.8142	0.87912	0.91779	-3.7611	0.92208	1	7	7.9647	0.087912	1	8	1.1154	0.88312	0.98686
prostaglandin A1	24	3.0352	0.28172	1	-3.0276	0.77522	0.91779	-4.604	0.94605	1	9	6.7702	0.1978	1	9	2.1305	0.8022	0.94619
prostaglandin A2	23	3.0352	0.25275	1	-3.0276	0.79321	0.91779	-2.9913	0.8961	1	9	6.7702	0.1978	1	9	2.1305	0.8022	0.94619
prostaglandin J2	21	4.2179	0.14585	1	-4.2099	0.89411	0.91779	-3.2766	0.9021	1	9	7.2272	0.16284	1	7	1.6444	0.81119	0.94619
trichloroethene	27	4.1056	0.14386	1	-4.0988	0.89411	0.91779	-3.8687	0.94006	1	13	5.3032	0.49151	1	9	0.6082	0.95105	0.99121
benzo[a]pyrene-4,5-oxide	29	4.5879	0.13886	1	-4.5812	0.90809	0.93009	-4.7913	0.95704	1	14	5.7811	0.42957	1	9	0.6082	0.95105	0.99121
12-keto-LTB4	31	4.5582	0.14086	1	-4.5518	0.91508	0.93315	-3.7792	0.92907	1	15	6.4301	0.37962	1	10	1.0474	0.92607	0.99121
fructose	27	4.5076	0.11289	1	-4.5076	0.91409	0.93315	-2.9574	0.90909	1	18	3.5312	0.85215	1	5	1.1132	0.78921	0.94619
N-acetyl-LTE4	58	5.3856	0.093906	1	-5.3856	0.94306	0.9595	11.236	0.015984	0.12388	37	10.343	0.34466	1	20	6.9021	0.33566	0.64232
hepoxilin A3	36	5.3725	0.1009	1	-5.3664	0.94505	0.9595	-4.7727	0.97103	1	18	7.3732	0.35564	1	10	1.8209	0.85415	0.96637
sulfate	39	6.9133	0.02997	1	-5.2561	0.95205	0.96449	7.9216	0.080919	0.38395	21	12	0.035964	0.6968	16	2.7249	0.88711	0.98686
K+	35	6.4365	0.045954	1	-6.312	0.97203	0.98046	0.11005	0.70529	1	22	6.0815	0.57942	1	10	-1.0262	0.998	0.999
PPARA	44	7.2304	0.027972	1	-6.3397	0.97103	0.98046	13.295	0.002997	0.048055	30	12.33	0.072927	1	13	8.0059	0.097902	0.43357
leukotriene E4	62	6.3624	0.057942	1	-6.3624	0.97502	0.98136	10.829	0.021978	0.16222	40	11.198	0.26573	1	20	6.9021	0.33566	0.64232
