# Supplementary material for: Metabolic Reprogramming and Tunneling Nanotubes Cooperate to Regulate HIV-1 Latency Reactivation
Source: Research Square preprint supplement (doi:10.21203/rs.3.rs-8529866/v1), 2026-01-21
Supplement: Supplementary file 4 [file eb51d1d13c829b3145a1872a.xlsx]

## Sheet: MdU1_PMA_vs_MdU1_DMSO
ID	GeneName	BioType	baseMean	log2FoldChange	lfcSE	stat	pvalue	padj	Significance
ENSG00000122176	FMOD	protein_coding	2.59818	-20.1506	4.23594	-4.75705	1.96444e-06	7.41317e-06	Down Regulated in MdU1_PMA
ENSG00000172139	SLC9C1	protein_coding	3.32787	-20.0974	4.23907	-4.74098	2.12684e-06	8.00583e-06	Down Regulated in MdU1_PMA
ENSG00000140937	CDH11	protein_coding	3.05619	-19.1808	4.25562	-4.50717	6.56995e-06	2.36326e-05	Down Regulated in MdU1_PMA
ENSG00000142449	FBN3	protein_coding	7.2376	-19.1631	2.61204	-7.33647	2.19303e-13	1.43118e-12	Down Regulated in MdU1_PMA
ENSG00000213996	TM6SF2	protein_coding	1.083	-19.0632	4.24715	-4.48846	7.17401e-06	2.5688e-05	Down Regulated in MdU1_PMA
ENSG00000099715	PCDH11Y	protein_coding	7.75123	-19.0586	4.26541	-4.46817	7.88916e-06	2.8131e-05	Down Regulated in MdU1_PMA
ENSG00000131096	PYY	protein_coding	1.39625	-18.9548	2.13741	-8.86811	7.43997e-19	6.69972e-18	Down Regulated in MdU1_PMA
ENSG00000204764	RANBP17	protein_coding	2.25039	-18.9034	2.96545	-6.37455	1.83503e-10	9.75841e-10	Down Regulated in MdU1_PMA
ENSG00000109501	WFS1	protein_coding	2.21052	-18.8651	2.50213	-7.5396	4.71405e-14	3.21169e-13	Down Regulated in MdU1_PMA
ENSG00000005513	SOX8	protein_coding	1.43923	-18.7838	3.72704	-5.03987	4.65859e-07	1.86685e-06	Down Regulated in MdU1_PMA
ENSG00000089116	LHX5	protein_coding	0.965749	-18.7402	3.53039	-5.30826	1.10674e-07	4.6982e-07	Down Regulated in MdU1_PMA
ENSG00000172264	MACROD2	protein_coding	0.937343	-18.6965	4.24851	-4.40071	1.07896e-05	3.78828e-05	Down Regulated in MdU1_PMA
ENSG00000184156	KCNQ3	protein_coding	1.77737	-18.6911	3.45697	-5.40679	6.41642e-08	2.77167e-07	Down Regulated in MdU1_PMA
ENSG00000151615	POU4F2	protein_coding	1.28166	-18.6435	3.25222	-5.73256	9.89256e-09	4.60592e-08	Down Regulated in MdU1_PMA
ENSG00000162951	LRRTM1	protein_coding	1.32964	-18.5293	3.8119	-4.86091	1.16846e-06	4.49824e-06	Down Regulated in MdU1_PMA
ENSG00000112273	HDGFL1	protein_coding	1.09989	-18.4574	4.02885	-4.58131	4.62072e-06	1.68928e-05	Down Regulated in MdU1_PMA
ENSG00000115705	TPO	protein_coding	2.43721	-18.4466	4.27078	-4.31925	1.56562e-05	5.40649e-05	Down Regulated in MdU1_PMA
ENSG00000169856	ONECUT1	protein_coding	0.937649	-18.3613	3.55174	-5.16967	2.34509e-07	9.68556e-07	Down Regulated in MdU1_PMA
ENSG00000138741	TRPC3	protein_coding	3.2657	-18.2851	2.2141	-8.25846	1.47568e-16	1.16796e-15	Down Regulated in MdU1_PMA
ENSG00000163283	ALPP	protein_coding	0.612283	-18.2619	4.03698	-4.52366	6.07794e-06	2.19632e-05	Down Regulated in MdU1_PMA
ENSG00000227471	AKR1B15	protein_coding	0.670336	-18.2607	4.25125	-4.29537	1.74404e-05	5.98669e-05	Down Regulated in MdU1_PMA
ENSG00000164684	ZNF704	protein_coding	4.56307	-18.2	3.43994	-5.29077	1.218e-07	5.14167e-07	Down Regulated in MdU1_PMA
ENSG00000165568	AKR1E2	protein_coding	1.42193	-18.1372	4.27358	-4.24402	2.19547e-05	7.44795e-05	Down Regulated in MdU1_PMA
ENSG00000180043	GARIN5B	protein_coding	0.618221	-18.1312	4.26143	-4.25473	2.09297e-05	7.11617e-05	Down Regulated in MdU1_PMA
ENSG00000111344	RASAL1	protein_coding	1.08004	-18.1275	4.27235	-4.24297	2.20582e-05	7.4804e-05	Down Regulated in MdU1_PMA
ENSG00000185313	SCN10A	protein_coding	1.21071	-18.127	4.27245	-4.24278	2.20772e-05	7.48435e-05	Down Regulated in MdU1_PMA
ENSG00000124449	IRGC	protein_coding	1.04534	-18.1252	2.64291	-6.85807	6.97979e-12	4.14532e-11	Down Regulated in MdU1_PMA
ENSG00000105137	SYDE1	protein_coding	1.55056	-18.0771	3.65743	-4.94257	7.71004e-07	3.02558e-06	Down Regulated in MdU1_PMA
ENSG00000141255	SPATA22	protein_coding	1.65101	-18.0763	4.1981	-4.30583	1.6636e-05	5.72355e-05	Down Regulated in MdU1_PMA
ENSG00000170289	CNGB3	protein_coding	1.81577	-18.0706	3.44999	-5.23787	1.62443e-07	6.79183e-07	Down Regulated in MdU1_PMA
ENSG00000182968	SOX1	protein_coding	1.86339	-18.0652	2.54941	-7.08602	1.38021e-12	8.54261e-12	Down Regulated in MdU1_PMA
ENSG00000178015	GPR150	protein_coding	1.49151	-18.0645	3.32514	-5.43271	5.55045e-08	2.40764e-07	Down Regulated in MdU1_PMA
ENSG00000170577	SIX2	protein_coding	0.74136	-18.0573	3.855	-4.68413	2.81155e-06	1.04674e-05	Down Regulated in MdU1_PMA
ENSG00000176720	BOK	protein_coding	1.0788	-18.056	3.46223	-5.21515	1.83667e-07	7.65317e-07	Down Regulated in MdU1_PMA
ENSG00000163958	ZDHHC19	protein_coding	0.648992	-18.0163	4.26769	-4.22155	2.42628e-05	8.18858e-05	Down Regulated in MdU1_PMA
ENSG00000171595	DNAI2	protein_coding	1.1123	-17.9605	3.38697	-5.30282	1.1403e-07	4.83546e-07	Down Regulated in MdU1_PMA
ENSG00000197177	ADGRA1	protein_coding	1.08383	-17.9587	4.2727	-4.20313	2.63249e-05	8.8451e-05	Down Regulated in MdU1_PMA
ENSG00000135903	PAX3	protein_coding	0.940881	-17.897	4.19861	-4.26259	2.02068e-05	6.87752e-05	Down Regulated in MdU1_PMA
ENSG00000186976	EFCAB6	protein_coding	0.827968	-17.893	3.90479	-4.58231	4.59858e-06	1.68213e-05	Down Regulated in MdU1_PMA
ENSG00000154864	PIEZO2	protein_coding	1.1654	-17.8889	3.91296	-4.5717	4.83779e-06	1.76602e-05	Down Regulated in MdU1_PMA
ENSG00000121904	CSMD2	protein_coding	3.39009	-17.8854	1.76782	-10.1172	4.63296e-24	5.22996e-23	Down Regulated in MdU1_PMA
ENSG00000273238	TMEM271	protein_coding	1.34223	-17.8756	2.78511	-6.4183	1.37808e-10	7.39636e-10	Down Regulated in MdU1_PMA
ENSG00000162551	ALPL	protein_coding	1.47705	-17.8732	4.27321	-4.18262	2.88167e-05	9.633e-05	Down Regulated in MdU1_PMA
ENSG00000171587	DSCAM	protein_coding	1.63226	-17.8578	3.54649	-5.03535	4.76973e-07	1.90867e-06	Down Regulated in MdU1_PMA
ENSG00000197705	KLHL14	protein_coding	0.784699	-17.8312	4.27177	-4.17419	2.99048e-05	9.97807e-05	Down Regulated in MdU1_PMA
ENSG00000156140	ADAMTS3	protein_coding	1.86539	-17.7934	2.9369	-6.05858	1.37327e-09	6.79249e-09	Down Regulated in MdU1_PMA
ENSG00000144810	COL8A1	protein_coding	3.71605	-17.7912	4.27307	-4.16358	3.13301e-05	0.000104271	Down Regulated in MdU1_PMA
ENSG00000133110	POSTN	protein_coding	1.06462	-17.7811	4.27406	-4.16022	3.17934e-05	0.000105724	Down Regulated in MdU1_PMA
ENSG00000178363	CALML3	protein_coding	0.902809	-17.7713	4.22886	-4.20238	2.64119e-05	8.86828e-05	Down Regulated in MdU1_PMA
ENSG00000146360	GPR6	protein_coding	0.596513	-17.7547	4.27279	-4.15528	3.24888e-05	0.000107927	Down Regulated in MdU1_PMA
ENSG00000198680	TUSC1	protein_coding	0.588619	-17.7088	4.27341	-4.14396	3.41361e-05	0.000113208	Down Regulated in MdU1_PMA
ENSG00000019186	CYP24A1	protein_coding	3.18582	-17.6869	4.27306	-4.13917	3.48565e-05	0.000115496	Down Regulated in MdU1_PMA
ENSG00000101292	PROKR2	protein_coding	0.627311	-17.6165	4.27395	-4.12184	3.75854e-05	0.000124062	Down Regulated in MdU1_PMA
ENSG00000185264	TEX33	protein_coding	0.677422	-17.6035	4.27976	-4.11319	3.90227e-05	0.000128568	Down Regulated in MdU1_PMA
ENSG00000103449	SALL1	protein_coding	2.5516	-17.601	4.27309	-4.11903	3.80478e-05	0.000125481	Down Regulated in MdU1_PMA
ENSG00000039068	CDH1	protein_coding	1.89603	-17.5681	2.8716	-6.11788	9.48298e-10	4.74897e-09	Down Regulated in MdU1_PMA
ENSG00000169836	TACR3	protein_coding	0.58265	-17.5568	4.27419	-4.10764	3.99729e-05	0.000131523	Down Regulated in MdU1_PMA
ENSG00000148156	ACTL7B	protein_coding	0.635153	-17.5496	3.96276	-4.42863	9.48344e-06	3.35183e-05	Down Regulated in MdU1_PMA
ENSG00000254959	INMT-MINDY4	protein_coding	0.469327	-17.5397	4.26585	-4.11164	3.92851e-05	0.00012939	Down Regulated in MdU1_PMA
ENSG00000174482	LINGO2	protein_coding	1.26814	-17.5264	4.27274	-4.10191	4.09753e-05	0.000134686	Down Regulated in MdU1_PMA
ENSG00000105255	FSD1	protein_coding	2.99733	-17.4647	2.49465	-7.00085	2.54409e-12	1.55458e-11	Down Regulated in MdU1_PMA
ENSG00000182674	KCNB2	protein_coding	0.817225	-17.4417	3.25548	-5.35763	8.43222e-08	3.60836e-07	Down Regulated in MdU1_PMA
ENSG00000197594	ENPP1	protein_coding	1.27383	-17.439	2.89929	-6.0149	1.79993e-09	8.82735e-09	Down Regulated in MdU1_PMA
ENSG00000167555	ZNF528	protein_coding	0.857008	-17.4245	4.27333	-4.07751	4.55208e-05	0.000148584	Down Regulated in MdU1_PMA
ENSG00000197124	ZNF682	protein_coding	0.740354	-17.4206	4.27868	-4.07148	4.67147e-05	0.000152254	Down Regulated in MdU1_PMA
ENSG00000112319	EYA4	protein_coding	1.43829	-17.3779	4.27268	-4.0672	4.75809e-05	0.000154898	Down Regulated in MdU1_PMA
ENSG00000168447	SCNN1B	protein_coding	0.883769	-17.3458	4.27429	-4.05817	4.94594e-05	0.000160668	Down Regulated in MdU1_PMA
ENSG00000039139	DNAH5	protein_coding	1.57907	-17.3084	4.23819	-4.08393	4.42806e-05	0.000144897	Down Regulated in MdU1_PMA
ENSG00000168412	MTNR1A	protein_coding	1.93223	-17.2937	3.97707	-4.34834	1.37173e-05	4.75931e-05	Down Regulated in MdU1_PMA
ENSG00000169116	PARM1	protein_coding	0.820613	-17.2268	3.43707	-5.01205	5.38536e-07	2.14673e-06	Down Regulated in MdU1_PMA
ENSG00000006611	USH1C	protein_coding	1.08969	-17.1422	2.96297	-5.78548	7.23058e-09	3.39544e-08	Down Regulated in MdU1_PMA
ENSG00000184330	S100A7A	protein_coding	0.978784	-17.1226	4.11734	-4.15865	3.20137e-05	0.000106402	Down Regulated in MdU1_PMA
ENSG00000169064	ZBBX	protein_coding	1.25771	-17.0985	3.00608	-5.68797	1.28555e-08	5.91684e-08	Down Regulated in MdU1_PMA
ENSG00000129521	EGLN3	protein_coding	1.0896	-17.0769	4.27294	-3.99652	6.42803e-05	0.000205923	Down Regulated in MdU1_PMA
ENSG00000102678	FGF9	protein_coding	1.11123	-17.0588	3.95331	-4.31506	1.59557e-05	5.50395e-05	Down Regulated in MdU1_PMA
ENSG00000141738	GRB7	protein_coding	0.709917	-17.0301	3.85873	-4.4134	1.01758e-05	3.58431e-05	Down Regulated in MdU1_PMA
ENSG00000124827	GCM2	protein_coding	0.447321	-17.0098	3.81388	-4.45997	8.19719e-06	2.91765e-05	Down Regulated in MdU1_PMA
ENSG00000139304	PTPRQ	protein_coding	0.911925	-16.9981	4.19959	-4.04756	5.17537e-05	0.000167705	Down Regulated in MdU1_PMA
ENSG00000086696	HSD17B2	protein_coding	0.972539	-16.9024	3.01247	-5.61079	2.014e-08	9.10768e-08	Down Regulated in MdU1_PMA
ENSG00000141744	PNMT	protein_coding	0.323692	-16.8905	4.07053	-4.14946	3.33261e-05	0.000110615	Down Regulated in MdU1_PMA
ENSG00000142173	COL6A2	protein_coding	3.31127	-16.8447	4.27236	-3.94272	8.05622e-05	0.000255092	Down Regulated in MdU1_PMA
ENSG00000187323	DCC	protein_coding	1.1468	-16.8349	3.91207	-4.30331	1.68262e-05	5.78393e-05	Down Regulated in MdU1_PMA
ENSG00000148488	ST8SIA6	protein_coding	0.477815	-16.8192	4.27336	-3.93582	8.29134e-05	0.000261989	Down Regulated in MdU1_PMA
ENSG00000147873	IFNA5	protein_coding	0.644696	-16.7906	3.23005	-5.19825	2.01178e-07	8.34926e-07	Down Regulated in MdU1_PMA
ENSG00000139219	COL2A1	protein_coding	3.93011	-16.4045	2.12142	-7.73279	1.05219e-14	7.49016e-14	Down Regulated in MdU1_PMA
ENSG00000157219	HTR5A	protein_coding	0.242	-16.2185	4.27686	-3.79216	0.000149342	0.000456777	Down Regulated in MdU1_PMA
ENSG00000152078	TLCD4	protein_coding	0.295749	-16.2059	4.23685	-3.82499	0.000130776	0.000402935	Down Regulated in MdU1_PMA
ENSG00000104237	RP1	protein_coding	2.14969	-16.0145	2.42575	-6.60187	4.06012e-11	2.26694e-10	Down Regulated in MdU1_PMA
ENSG00000185008	ROBO2	protein_coding	1.92628	-15.8928	2.55099	-6.23004	4.66308e-10	2.39871e-09	Down Regulated in MdU1_PMA
ENSG00000165338	HECTD2	protein_coding	1.45772	-15.6521	2.28595	-6.8471	7.53601e-12	4.46891e-11	Down Regulated in MdU1_PMA
ENSG00000170113	NIPA1	protein_coding	4.17739	-15.6054	4.27277	-3.6523	0.000259898	0.00077177	Down Regulated in MdU1_PMA
ENSG00000178662	CSRNP3	protein_coding	2.26742	-15.5648	3.20611	-4.85471	1.20561e-06	4.63312e-06	Down Regulated in MdU1_PMA
ENSG00000007908	SELE	protein_coding	1.64629	-15.4674	3.57512	-4.3264	1.51569e-05	5.24218e-05	Down Regulated in MdU1_PMA
ENSG00000182253	SYNM	protein_coding	1.24532	-15.3935	3.3349	-4.61589	3.91412e-06	1.43818e-05	Down Regulated in MdU1_PMA
ENSG00000060718	COL11A1	protein_coding	2.09463	-15.3764	2.871	-5.35576	8.5196e-08	3.641e-07	Down Regulated in MdU1_PMA
ENSG00000173641	HSPB7	protein_coding	1.2449	-15.3342	3.84416	-3.98897	6.6361e-05	0.000212213	Down Regulated in MdU1_PMA
ENSG00000168505	GBX2	protein_coding	1.21935	-15.1917	3.86049	-3.93517	8.31377e-05	0.000262655	Down Regulated in MdU1_PMA
ENSG00000230453	ANKRD18B	protein_coding	1.74604	-15.1892	3.00721	-5.05094	4.39642e-07	1.76611e-06	Down Regulated in MdU1_PMA
ENSG00000166979	EVA1C	protein_coding	1.67061	-15.1889	2.64925	-5.73327	9.85105e-09	4.58767e-08	Down Regulated in MdU1_PMA
ENSG00000154080	CHST9	protein_coding	1.41605	-15.1309	3.75807	-4.02622	5.66796e-05	0.000182764	Down Regulated in MdU1_PMA
ENSG00000171804	WDR87	protein_coding	1.48753	-15.1125	4.27337	-3.53643	0.000405571	0.00117821	Down Regulated in MdU1_PMA
ENSG00000187714	SLC18A3	protein_coding	1.2822	-15.1065	3.86397	-3.90959	9.24535e-05	0.000290176	Down Regulated in MdU1_PMA
ENSG00000163497	FEV	protein_coding	0.89973	-15.0876	4.27335	-3.53063	0.000414574	0.00120312	Down Regulated in MdU1_PMA
ENSG00000137571	SLCO5A1	protein_coding	2.04883	-15.0548	3.40279	-4.42426	9.67752e-06	3.41613e-05	Down Regulated in MdU1_PMA
ENSG00000118777	ABCG2	protein_coding	1.64317	-15.0316	3.28335	-4.57815	4.69117e-06	1.71345e-05	Down Regulated in MdU1_PMA
ENSG00000174898	CATSPERD	protein_coding	1.14673	-14.9891	2.79524	-5.36236	8.21405e-08	3.51729e-07	Down Regulated in MdU1_PMA
ENSG00000183153	GJD3	protein_coding	1.19259	-14.9727	4.27292	-3.50409	0.000458169	0.0013201	Down Regulated in MdU1_PMA
ENSG00000120907	ADRA1A	protein_coding	0.946989	-14.9297	4.27316	-3.49384	0.000476121	0.00136821	Down Regulated in MdU1_PMA
ENSG00000156968	MPV17L	protein_coding	0.846536	-14.9125	2.78428	-5.35597	8.50999e-08	3.63847e-07	Down Regulated in MdU1_PMA
ENSG00000146839	ZAN	protein_coding	1.35702	-14.9006	3.77828	-3.94375	8.0218e-05	0.000254046	Down Regulated in MdU1_PMA
ENSG00000165061	ZMAT4	protein_coding	1.35461	-14.8916	2.72807	-5.45867	4.79727e-08	2.09572e-07	Down Regulated in MdU1_PMA
ENSG00000136099	PCDH8	protein_coding	2.525	-14.8703	2.38928	-6.22377	4.85358e-10	2.49215e-09	Down Regulated in MdU1_PMA
ENSG00000117069	ST6GALNAC5	protein_coding	1.23382	-14.7922	3.32717	-4.44589	8.75295e-06	3.10424e-05	Down Regulated in MdU1_PMA
ENSG00000129221	AIPL1	protein_coding	1.4012	-14.7846	3.81196	-3.87848	0.00010511	0.000327705	Down Regulated in MdU1_PMA
ENSG00000171044	XKR6	protein_coding	0.784138	-14.7805	4.27337	-3.45874	0.000542704	0.00154825	Down Regulated in MdU1_PMA
ENSG00000213892	CEACAM16	protein_coding	0.734385	-14.7787	4.2736	-3.45813	0.000543936	0.00155154	Down Regulated in MdU1_PMA
ENSG00000146938	NLGN4X	protein_coding	1.4501	-14.7706	3.65749	-4.03845	5.38045e-05	0.000174007	Down Regulated in MdU1_PMA
ENSG00000169515	CCDC8	protein_coding	0.696041	-14.7468	4.2736	-3.45067	0.000559187	0.00159112	Down Regulated in MdU1_PMA
ENSG00000204147	ASAH2B	protein_coding	0.955528	-14.7001	4.1896	-3.50871	0.000450281	0.00129927	Down Regulated in MdU1_PMA
ENSG00000189401	OTUD6A	protein_coding	0.93714	-14.6985	4.27329	-3.43964	0.000582498	0.00165338	Down Regulated in MdU1_PMA
ENSG00000135074	ADAM19	protein_coding	0.769923	-14.6944	4.27378	-3.43828	0.000585423	0.0016612	Down Regulated in MdU1_PMA
ENSG00000133142	TCEAL4	protein_coding	0.752829	-14.6801	4.2785	-3.43113	0.00060108	0.00170146	Down Regulated in MdU1_PMA
ENSG00000102313	ITIH6	protein_coding	0.679851	-14.6792	4.27569	-3.43319	0.000596522	0.00169045	Down Regulated in MdU1_PMA
ENSG00000104332	SFRP1	protein_coding	0.628918	-14.67	4.2737	-3.43261	0.000597798	0.00169339	Down Regulated in MdU1_PMA
ENSG00000135111	TBX3	protein_coding	0.895938	-14.6679	4.23048	-3.46719	0.000525931	0.00150323	Down Regulated in MdU1_PMA
ENSG00000168491	CCDC110	protein_coding	0.670894	-14.6612	4.27489	-3.42961	0.000604458	0.00171028	Down Regulated in MdU1_PMA
ENSG00000152969	JAKMIP1	protein_coding	1.31799	-14.6413	3.77016	-3.88348	0.000102973	0.000321297	Down Regulated in MdU1_PMA
ENSG00000143469	SYT14	protein_coding	0.71515	-14.6384	4.27329	-3.42556	0.000613525	0.00173469	Down Regulated in MdU1_PMA
ENSG00000176256	HMGB4	protein_coding	1.15013	-14.624	3.92301	-3.72774	0.000193202	0.000582627	Down Regulated in MdU1_PMA
ENSG00000164294	GPX8	protein_coding	0.701507	-14.6183	4.28094	-3.41473	0.000638441	0.00180074	Down Regulated in MdU1_PMA
ENSG00000110680	CALCA	protein_coding	0.515984	-14.6021	4.27868	-3.41277	0.00064307	0.00181354	Down Regulated in MdU1_PMA
ENSG00000258830	ENSG00000258830	protein_coding	2.31988	-14.5921	2.77911	-5.25065	1.51565e-07	6.3532e-07	Down Regulated in MdU1_PMA
ENSG00000187823	RTL4	protein_coding	0.512566	-14.5658	4.27404	-3.40796	0.0006545	0.00184392	Down Regulated in MdU1_PMA
ENSG00000101134	DOK5	protein_coding	1.02965	-14.5589	4.27416	-3.40626	0.000658597	0.0018552	Down Regulated in MdU1_PMA
ENSG00000123700	KCNJ2	protein_coding	0.476977	-14.5446	4.2737	-3.40328	0.000665811	0.00187418	Down Regulated in MdU1_PMA
ENSG00000180875	GREM2	protein_coding	0.500275	-14.5391	4.2742	-3.40159	0.000669956	0.0018845	Down Regulated in MdU1_PMA
ENSG00000169035	KLK7	protein_coding	0.56738	-14.5357	4.27714	-3.39847	0.000677649	0.00190396	Down Regulated in MdU1_PMA
ENSG00000134817	APLNR	protein_coding	0.686975	-14.5263	4.27421	-3.3986	0.000677313	0.00190329	Down Regulated in MdU1_PMA
ENSG00000198108	CHSY3	protein_coding	0.506357	-14.4955	4.27377	-3.39174	0.000694498	0.00194907	Down Regulated in MdU1_PMA
ENSG00000149300	C11orf52	protein_coding	0.665399	-14.4876	3.9912	-3.62988	0.000283557	0.000839871	Down Regulated in MdU1_PMA
ENSG00000229314	ORM1	protein_coding	0.452091	-14.4835	4.27854	-3.38514	0.000711413	0.00199134	Down Regulated in MdU1_PMA
ENSG00000204961	PCDHA9	protein_coding	0.693188	-14.4744	3.38873	-4.27134	1.94306e-05	6.62937e-05	Down Regulated in MdU1_PMA
ENSG00000110777	POU2AF1	protein_coding	1.10276	-14.4736	3.82244	-3.7865	0.000152786	0.000466733	Down Regulated in MdU1_PMA
ENSG00000182022	CHST15	protein_coding	0.852393	-14.4682	3.62498	-3.99126	6.57221e-05	0.000210302	Down Regulated in MdU1_PMA
ENSG00000185294	SPPL2C	protein_coding	0.726694	-14.4663	3.96532	-3.64821	0.000264075	0.000783819	Down Regulated in MdU1_PMA
ENSG00000133863	TEX15	protein_coding	0.78703	-14.4517	4.27304	-3.38207	0.000719423	0.00201242	Down Regulated in MdU1_PMA
ENSG00000170162	VGLL2	protein_coding	0.442461	-14.4423	4.2742	-3.37896	0.000727615	0.00203389	Down Regulated in MdU1_PMA
ENSG00000188558	OR2G6	protein_coding	0.758419	-14.4415	3.81142	-3.789	0.000151254	0.000462266	Down Regulated in MdU1_PMA
ENSG00000182070	OR52A1	protein_coding	0.464323	-14.4408	4.27469	-3.3782	0.000729623	0.00203863	Down Regulated in MdU1_PMA
ENSG00000269437	NXF2B	protein_coding	0.499207	-14.4357	4.27868	-3.37388	0.000741171	0.00206885	Down Regulated in MdU1_PMA
ENSG00000246705	H2AJ	protein_coding	1.04332	-14.434	4.04271	-3.57037	0.000356479	0.00104205	Down Regulated in MdU1_PMA
ENSG00000185176	AQP12B	protein_coding	0.401984	-14.4279	4.27424	-3.37554	0.000736696	0.00205723	Down Regulated in MdU1_PMA
ENSG00000164794	KCNV1	protein_coding	0.384401	-14.3999	4.27534	-3.36814	0.00075678	0.00211002	Down Regulated in MdU1_PMA
ENSG00000147262	GPR119	protein_coding	0.368821	-14.3697	4.27854	-3.35856	0.000783503	0.00218061	Down Regulated in MdU1_PMA
ENSG00000147100	SLC16A2	protein_coding	0.423933	-14.3567	4.27575	-3.35772	0.00078589	0.00218592	Down Regulated in MdU1_PMA
ENSG00000182077	PTCHD3	protein_coding	0.615571	-14.3533	4.27398	-3.3583	0.000784227	0.00218222	Down Regulated in MdU1_PMA
ENSG00000112499	SLC22A2	protein_coding	0.92873	-14.3326	4.21174	-3.403	0.000666509	0.00187587	Down Regulated in MdU1_PMA
ENSG00000224440	CXorf51A	protein_coding	0.432629	-14.3035	4.27637	-3.34478	0.000823471	0.0022827	Down Regulated in MdU1_PMA
ENSG00000164484	TMEM200A	protein_coding	0.633121	-14.2783	4.27365	-3.34101	0.000834733	0.00231229	Down Regulated in MdU1_PMA
ENSG00000203972	GLYATL3	protein_coding	0.5577	-14.2543	4.09935	-3.47722	0.000506636	0.00145103	Down Regulated in MdU1_PMA
ENSG00000162444	RBP7	protein_coding	0.528196	-14.2538	3.66827	-3.88569	0.000102038	0.00031843	Down Regulated in MdU1_PMA
ENSG00000163071	SPATA18	protein_coding	0.633607	-14.1961	3.93268	-3.60977	0.00030647	0.000903803	Down Regulated in MdU1_PMA
ENSG00000187772	LIN28B	protein_coding	0.577597	-14.149	4.27456	-3.31005	0.000932795	0.002563	Down Regulated in MdU1_PMA
ENSG00000149507	OOSP2	protein_coding	0.250797	-14.1424	4.28054	-3.30389	0.000953544	0.00261709	Down Regulated in MdU1_PMA
ENSG00000120659	TNFSF11	protein_coding	0.357323	-14.142	4.27529	-3.30786	0.000940133	0.00258172	Down Regulated in MdU1_PMA
ENSG00000170683	OR10A3	protein_coding	0.353334	-14.1371	4.27646	-3.3058	0.000947048	0.00260035	Down Regulated in MdU1_PMA
ENSG00000248993	ENSG00000248993	protein_coding	0.44442	-14.1208	4.27864	-3.30029	0.000965833	0.00264971	Down Regulated in MdU1_PMA
ENSG00000134249	ADAM30	protein_coding	0.273921	-14.1024	4.27732	-3.29701	0.000977189	0.002679	Down Regulated in MdU1_PMA
ENSG00000125848	FLRT3	protein_coding	0.308381	-14.0926	4.27529	-3.29629	0.000979714	0.00268555	Down Regulated in MdU1_PMA
ENSG00000168131	OR2B2	protein_coding	0.238704	-13.9814	4.27864	-3.26773	0.00108414	0.00295028	Down Regulated in MdU1_PMA
ENSG00000188816	HMX2	protein_coding	0.548358	-13.9315	4.27456	-3.25918	0.00111735	0.00303242	Down Regulated in MdU1_PMA
ENSG00000254553	ENSG00000254553	protein_coding	0.30971	-13.9312	4.27854	-3.25607	0.00112967	0.00306373	Down Regulated in MdU1_PMA
ENSG00000184867	ARMCX2	protein_coding	1.65315	-13.9161	3.53356	-3.93827	8.20709e-05	0.000259577	Down Regulated in MdU1_PMA
ENSG00000174255	ZNF80	protein_coding	0.383079	-13.8215	4.28029	-3.2291	0.0012418	0.0033393	Down Regulated in MdU1_PMA
ENSG00000184735	DDX53	protein_coding	0.517492	-13.8018	4.27728	-3.22676	0.00125198	0.00336346	Down Regulated in MdU1_PMA
ENSG00000108878	CACNG1	protein_coding	0.351251	-13.7965	4.2773	-3.22551	0.00125747	0.00337635	Down Regulated in MdU1_PMA
ENSG00000235750	KIAA0040	protein_coding	1.1421	-13.7822	3.9746	-3.46758	0.000525176	0.00150151	Down Regulated in MdU1_PMA
ENSG00000168903	BTNL3	protein_coding	0.433806	-13.7807	4.27729	-3.22184	0.00127371	0.0034167	Down Regulated in MdU1_PMA
ENSG00000132010	ZNF20	protein_coding	0.424317	-13.778	4.27467	-3.22317	0.00126781	0.00340135	Down Regulated in MdU1_PMA
ENSG00000186446	ZNF501	protein_coding	0.177002	-13.7689	4.2773	-3.21906	0.00128613	0.00344767	Down Regulated in MdU1_PMA
ENSG00000147896	IFNK	protein_coding	0.388178	-13.7633	3.99783	-3.44269	0.000575968	0.00163555	Down Regulated in MdU1_PMA
ENSG00000186526	CYP4F8	protein_coding	1.15237	-13.7176	3.91476	-3.50407	0.00045821	0.0013201	Down Regulated in MdU1_PMA
ENSG00000090402	SI	protein_coding	0.296218	-13.7075	4.27426	-3.20699	0.00134129	0.00358724	Down Regulated in MdU1_PMA
ENSG00000165810	BTNL9	protein_coding	3.70567	-13.6869	4.27267	-3.20335	0.0013584	0.00362954	Down Regulated in MdU1_PMA
ENSG00000130829	DUSP9	protein_coding	1.28194	-13.6475	4.27319	-3.19375	0.00140439	0.00374491	Down Regulated in MdU1_PMA
ENSG00000262406	MMP12	protein_coding	0.236308	-13.6418	4.28519	-3.18347	0.00145519	0.00387081	Down Regulated in MdU1_PMA
ENSG00000259384	GH1	protein_coding	0.145604	-13.5441	4.28495	-3.16085	0.00157311	0.00416925	Down Regulated in MdU1_PMA
ENSG00000144057	ST6GAL2	protein_coding	5.98431	-13.5031	4.27254	-3.16044	0.00157529	0.00417389	Down Regulated in MdU1_PMA
ENSG00000206432	TMEM200C	protein_coding	1.76601	-13.4947	4.10299	-3.289	0.00100545	0.00275111	Down Regulated in MdU1_PMA
ENSG00000187033	SAMD7	protein_coding	0.75728	-13.4279	4.27366	-3.14203	0.00167784	0.0044301	Down Regulated in MdU1_PMA
ENSG00000162493	PDPN	protein_coding	0.799813	-13.3641	4.27583	-3.12551	0.00177498	0.00466966	Down Regulated in MdU1_PMA
ENSG00000226807	MROH5	protein_coding	0.634372	-13.3249	4.27314	-3.11829	0.00181906	0.00477734	Down Regulated in MdU1_PMA
ENSG00000215568	GAB4	protein_coding	0.799893	-13.277	4.27334	-3.10695	0.00189029	0.00495317	Down Regulated in MdU1_PMA
ENSG00000101542	CDH20	protein_coding	4.36033	-13.2313	4.27269	-3.09672	0.00195674	0.0051164	Down Regulated in MdU1_PMA
ENSG00000110148	CCKBR	protein_coding	3.34628	-13.0778	4.27332	-3.06033	0.00221094	0.00573307	Down Regulated in MdU1_PMA
ENSG00000095203	EPB41L4B	protein_coding	1.02984	-12.8866	4.27276	-3.01598	0.00256147	0.00657099	Down Regulated in MdU1_PMA
ENSG00000185002	RFX6	protein_coding	0.938587	-12.8201	4.27332	-3.00004	0.00269948	0.00689537	Down Regulated in MdU1_PMA
ENSG00000144331	ZNF385B	protein_coding	1.14024	-12.6015	4.27294	-2.94914	0.00318657	0.00803523	Down Regulated in MdU1_PMA
ENSG00000163295	ALPI	protein_coding	0.818483	-12.4636	4.27316	-2.91671	0.00353746	0.00886098	Down Regulated in MdU1_PMA
ENSG00000221882	OR3A2	protein_coding	1.51207	-12.1397	4.27385	-2.84045	0.00450495	0.0110924	Down Regulated in MdU1_PMA
ENSG00000122852	SFTPA1	protein_coding	1.11015	-12.0675	4.27686	-2.82158	0.00477874	0.0117196	Down Regulated in MdU1_PMA
ENSG00000185306	C12orf56	protein_coding	0.977859	-11.6182	4.2739	-2.7184	0.00655985	0.0157654	Down Regulated in MdU1_PMA
ENSG00000172782	FADS6	protein_coding	1.23896	-11.4854	3.83247	-2.99687	0.0027277	0.00696292	Down Regulated in MdU1_PMA
ENSG00000159337	PLA2G4D	protein_coding	1.00872	-11.2337	4.27317	-2.62888	0.00856658	0.0202202	Down Regulated in MdU1_PMA
ENSG00000112246	SIM1	protein_coding	1.98598	-11.2257	3.31619	-3.38512	0.000711484	0.00199134	Down Regulated in MdU1_PMA
ENSG00000267221	C17orf113	protein_coding	1.03332	-11.0454	4.08222	-2.70574	0.00681533	0.0163435	Down Regulated in MdU1_PMA
ENSG00000144285	SCN1A	protein_coding	13.3953	-10.8652	4.27246	-2.54308	0.010988	0.0254562	Down Regulated in MdU1_PMA
ENSG00000267645	ENSG00000267645	protein_coding	209.279	-9.56322	0.880586	-10.8601	1.78634e-27	2.34789e-26	Down Regulated in MdU1_PMA
ENSG00000164362	TERT	protein_coding	292.138	-9.39953	0.871245	-10.7886	3.89613e-27	5.04344e-26	Down Regulated in MdU1_PMA
ENSG00000118492	ADGB	protein_coding	2.09008	-9.24211	4.27283	-2.16299	0.0305418	0.0647147	Non Significant
ENSG00000181072	CHRM2	protein_coding	1.99801	-9.2133	4.27274	-2.1563	0.0310604	0.0656933	Non Significant
ENSG00000164483	SAMD3	protein_coding	0.971503	-9.2108	4.27302	-2.15557	0.0311169	0.0657916	Non Significant
ENSG00000149516	MS4A3	protein_coding	326.291	-9.06937	0.454157	-19.9697	1.01098e-88	7.77035e-87	Down Regulated in MdU1_PMA
ENSG00000064655	EYA2	protein_coding	3.48022	-8.95802	4.27291	-2.09647	0.0360408	0.0750809	Non Significant
ENSG00000012504	NR1H4	protein_coding	1.288	-8.91884	4.27569	-2.08594	0.0369838	0.0768257	Non Significant
ENSG00000100448	CTSG	protein_coding	11384.7	-8.89483	0.240086	-37.0486	1.8913e-300	4.65164e-297	Down Regulated in MdU1_PMA
ENSG00000107518	ATRNL1	protein_coding	2.66428	-8.87038	4.27277	-2.07603	0.0378915	0.0785702	Non Significant
ENSG00000180155	LYNX1	protein_coding	2.51803	-8.86207	4.27314	-2.0739	0.0380885	0.0789538	Non Significant
ENSG00000139220	PPFIA2	protein_coding	2.47282	-8.84464	4.27307	-2.06985	0.0384661	0.0796609	Non Significant
ENSG00000170324	FRMPD2	protein_coding	1.46997	-8.83624	4.2728	-2.06802	0.038638	0.0799749	Non Significant
ENSG00000136267	DGKB	protein_coding	2.26803	-8.83035	4.27331	-2.06639	0.0387912	0.0802751	Non Significant
ENSG00000016402	IL20RA	protein_coding	2.18721	-8.81623	4.27342	-2.06304	0.0391089	0.0808476	Non Significant
ENSG00000215029	TCP11X2	protein_coding	2.67807	-8.80746	4.27296	-2.06121	0.0392834	0.0811401	Non Significant
ENSG00000185231	MC2R	protein_coding	1.3365	-8.80594	4.27307	-2.0608	0.0393224	0.081195	Non Significant
ENSG00000196724	ZNF418	protein_coding	1.26586	-8.77773	4.27331	-2.05408	0.0399677	0.0824151	Non Significant
ENSG00000134640	MTNR1B	protein_coding	1.26659	-8.77712	4.27314	-2.05402	0.0399737	0.0824189	Non Significant
ENSG00000087510	TFAP2C	protein_coding	1.20915	-8.76137	4.27307	-2.05037	0.0403285	0.083072	Non Significant
ENSG00000138115	CYP2C8	protein_coding	1.27714	-8.75627	4.27371	-2.04887	0.0404749	0.0833474	Non Significant
ENSG00000186297	GABRA5	protein_coding	1.20157	-8.75367	4.27307	-2.04856	0.0405047	0.0833913	Non Significant
ENSG00000251664	PCDHA12	protein_coding	1.16348	-8.74759	4.27291	-2.04722	0.0406366	0.0836365	Non Significant
ENSG00000183098	GPC6	protein_coding	1.66612	-8.74433	4.27296	-2.04643	0.0407137	0.0837866	Non Significant
ENSG00000205359	SLCO6A1	protein_coding	1.17596	-8.74288	4.27342	-2.04587	0.0407687	0.083891	Non Significant
ENSG00000137699	TRIM29	protein_coding	1.1834	-8.73762	4.27258	-2.04504	0.0408505	0.0840417	Non Significant
ENSG00000154493	C10orf90	protein_coding	1.16336	-8.72835	4.27371	-2.04234	0.0411182	0.0845483	Non Significant
ENSG00000160856	FCRL3	protein_coding	1.20525	-8.72617	4.27391	-2.04173	0.0411782	0.0846361	Non Significant
ENSG00000204381	LAYN	protein_coding	1.12265	-8.72408	4.27342	-2.04148	0.0412036	0.0846796	Non Significant
ENSG00000166091	CMTM5	protein_coding	1.17325	-8.7114	4.27391	-2.03828	0.0415223	0.08529	Non Significant
ENSG00000172548	NIPAL4	protein_coding	1.08523	-8.71082	4.27307	-2.03854	0.0414962	0.0852453	Non Significant
ENSG00000143297	FCRL5	protein_coding	1.88965	-8.70624	4.27277	-2.03761	0.0415888	0.0853999	Non Significant
ENSG00000170486	KRT72	protein_coding	1.04832	-8.69416	4.27287	-2.03473	0.0418776	0.0858853	Non Significant
ENSG00000137473	TTC29	protein_coding	1.00131	-8.67382	4.27322	-2.02981	0.042376	0.0868351	Non Significant
ENSG00000164920	OSR2	protein_coding	0.973964	-8.65894	4.27291	-2.02647	0.0427166	0.0874509	Non Significant
ENSG00000039537	C6	protein_coding	0.933708	-8.64428	4.27314	-2.02293	0.04308	0.0881307	Non Significant
ENSG00000170419	VSTM2A	protein_coding	0.920686	-8.63952	4.27331	-2.02174	0.0432032	0.0883737	Non Significant
ENSG00000138738	PRDM5	protein_coding	0.914136	-8.63596	4.27314	-2.02099	0.0432813	0.0885241	Non Significant
ENSG00000260802	SERTM2	protein_coding	0.895572	-8.62131	4.27371	-2.01729	0.0436652	0.0892631	Non Significant
ENSG00000152936	LMNTD1	protein_coding	0.97349	-8.62129	4.27416	-2.01707	0.043688	0.0893003	Non Significant
ENSG00000118194	TNNT2	protein_coding	0.876044	-8.61263	4.27322	-2.01549	0.0438534	0.0896214	Non Significant
ENSG00000085741	WNT11	protein_coding	0.885252	-8.61208	4.27296	-2.01548	0.0438542	0.0896214	Non Significant
ENSG00000131864	USP29	protein_coding	0.89987	-8.61195	4.27391	-2.01501	0.0439039	0.0897138	Non Significant
ENSG00000205517	RGL3	protein_coding	0.869366	-8.6067	4.27355	-2.01395	0.0440152	0.0899225	Non Significant
ENSG00000187135	VSTM2B	protein_coding	0.855435	-8.60184	4.27277	-2.01318	0.0440961	0.0900597	Non Significant
ENSG00000105507	CABP5	protein_coding	0.902534	-8.60119	4.2745	-2.01221	0.0441979	0.0902301	Non Significant
ENSG00000241697	TMEFF1	protein_coding	0.85148	-8.60098	4.27277	-2.01298	0.0441172	0.0900934	Non Significant
ENSG00000197837	H4C16	protein_coding	0.879612	-8.59162	4.27391	-2.01025	0.0444047	0.0906335	Non Significant
ENSG00000149050	ZNF214	protein_coding	0.890145	-8.59129	4.27416	-2.01005	0.0444256	0.0906465	Non Significant
ENSG00000167759	KLK13	protein_coding	0.846714	-8.59069	4.27371	-2.01013	0.0444179	0.0906416	Non Significant
ENSG00000154545	MAGED4	protein_coding	0.88718	-8.58918	4.27416	-2.00956	0.0444778	0.0907074	Non Significant
ENSG00000125861	GFRA4	protein_coding	0.866447	-8.57578	4.27416	-2.00642	0.044811	0.0912923	Non Significant
ENSG00000215277	RNF212B	protein_coding	0.77949	-8.52128	4.2745	-1.99352	0.046205	0.0937924	Non Significant
ENSG00000206557	TRIM71	protein_coding	186.882	-7.96326	0.520148	-15.3096	6.59615e-53	1.95167e-51	Down Regulated in MdU1_PMA
ENSG00000124194	GDAP1L1	protein_coding	34.7437	-7.441	0.784186	-9.48882	2.33663e-21	2.36987e-20	Down Regulated in MdU1_PMA
ENSG00000078900	TP73	protein_coding	35.5671	-7.24136	0.677486	-10.6886	1.15127e-26	1.45581e-25	Down Regulated in MdU1_PMA
ENSG00000166402	TUB	protein_coding	8.07848	-7.23735	1.15155	-6.28485	3.28175e-10	1.71323e-09	Down Regulated in MdU1_PMA
ENSG00000255833	TIFAB	protein_coding	8.68184	-7.01702	1.2025	-5.83536	5.36738e-09	2.54908e-08	Down Regulated in MdU1_PMA
ENSG00000157445	CACNA2D3	protein_coding	66.6393	-7.00084	0.970641	-7.21259	5.48969e-13	3.4979e-12	Down Regulated in MdU1_PMA
ENSG00000214897	PNMA6E	protein_coding	20.523	-6.90932	0.87606	-7.8868	3.10028e-15	2.2677e-14	Down Regulated in MdU1_PMA
ENSG00000155966	AFF2	protein_coding	1898.53	-6.67799	0.243518	-27.4229	1.4614e-165	5.75092e-163	Down Regulated in MdU1_PMA
ENSG00000004468	CD38	protein_coding	886.575	-6.5366	0.365058	-17.9056	1.06594e-71	5.41952e-70	Down Regulated in MdU1_PMA
ENSG00000164099	PRSS12	protein_coding	24.8373	-6.5025	0.726543	-8.94992	3.55746e-19	3.25414e-18	Down Regulated in MdU1_PMA
ENSG00000227191	TRGC2	TR_C_gene	68.7925	-6.46047	0.453258	-14.2534	4.26882e-46	1.04081e-44	Down Regulated in MdU1_PMA
ENSG00000183691	NOG	protein_coding	328.702	-6.45644	0.421795	-15.3071	6.86036e-53	2.02679e-51	Down Regulated in MdU1_PMA
ENSG00000156219	ART3	protein_coding	59.326	-6.45192	0.903557	-7.14058	9.29404e-13	5.82202e-12	Down Regulated in MdU1_PMA
ENSG00000182676	PPP1R27	protein_coding	27.1593	-6.42716	0.753506	-8.52967	1.46767e-17	1.22053e-16	Down Regulated in MdU1_PMA
ENSG00000272636	DOC2B	protein_coding	15.4665	-6.317	0.778879	-8.11038	5.0463e-16	3.86798e-15	Down Regulated in MdU1_PMA
ENSG00000187479	C11orf96	protein_coding	12.6345	-6.30313	0.923537	-6.82499	8.79335e-12	5.18639e-11	Down Regulated in MdU1_PMA
ENSG00000184937	WT1	protein_coding	69.321	-6.209	0.851034	-7.29583	2.96818e-13	1.92555e-12	Down Regulated in MdU1_PMA
ENSG00000129170	CSRP3	protein_coding	150.907	-6.13405	0.867017	-7.07489	1.49566e-12	9.24264e-12	Down Regulated in MdU1_PMA
ENSG00000128322	IGLL1	protein_coding	4.58599	-6.12279	1.35444	-4.52053	6.16843e-06	2.22697e-05	Down Regulated in MdU1_PMA
ENSG00000180447	GAS1	protein_coding	24.9675	-6.04927	0.867827	-6.97059	3.15609e-12	1.91665e-11	Down Regulated in MdU1_PMA
ENSG00000125869	LAMP5	protein_coding	2950.42	-5.92351	0.146707	-40.3764	0	0	Down Regulated in MdU1_PMA
ENSG00000204128	C2orf72	protein_coding	3.01651	-5.91879	1.45112	-4.07877	4.52746e-05	0.00014783	Down Regulated in MdU1_PMA
ENSG00000041353	RAB27B	protein_coding	1650.79	-5.87601	0.218119	-26.9395	7.56879e-160	2.7077e-157	Down Regulated in MdU1_PMA
ENSG00000139445	FOXN4	protein_coding	5.75804	-5.8685	1.22419	-4.79379	1.63663e-06	6.22027e-06	Down Regulated in MdU1_PMA
ENSG00000149534	MS4A2	protein_coding	5.04518	-5.83708	1.12308	-5.19738	2.02117e-07	8.38643e-07	Down Regulated in MdU1_PMA
ENSG00000256349	ENSG00000256349	protein_coding	3.07285	-5.824	4.21906	-1.3804	0.167463	0.292706	Non Significant
ENSG00000164509	IL31RA	protein_coding	436.312	-5.76863	0.291318	-19.8018	2.87123e-87	2.13186e-85	Down Regulated in MdU1_PMA
ENSG00000019169	MARCO	protein_coding	13.1411	-5.74209	0.78823	-7.28479	3.22166e-13	2.08312e-12	Down Regulated in MdU1_PMA
ENSG00000182168	UNC5C	protein_coding	446.004	-5.65671	0.254625	-22.2158	2.41603e-109	2.77999e-107	Down Regulated in MdU1_PMA
ENSG00000137831	UACA	protein_coding	197.136	-5.64825	0.67806	-8.33002	8.08299e-17	6.47825e-16	Down Regulated in MdU1_PMA
ENSG00000166482	MFAP4	protein_coding	220.445	-5.60693	0.322242	-17.3998	8.28533e-68	3.67996e-66	Down Regulated in MdU1_PMA
ENSG00000169126	ODAD2	protein_coding	21.2396	-5.58959	0.958644	-5.83073	5.51866e-09	2.61588e-08	Down Regulated in MdU1_PMA
ENSG00000198754	OXCT2	protein_coding	5.41494	-5.5884	1.05518	-5.29614	1.18278e-07	5.00124e-07	Down Regulated in MdU1_PMA
ENSG00000205795	CYS1	protein_coding	19.0716	-5.58696	0.885329	-6.3106	2.77954e-10	1.45841e-09	Down Regulated in MdU1_PMA
ENSG00000224940	PRRT4	protein_coding	86.7804	-5.57563	0.462509	-12.0552	1.82163e-33	2.89987e-32	Down Regulated in MdU1_PMA
ENSG00000177272	KCNA3	protein_coding	1435.04	-5.56726	0.206685	-26.936	8.32825e-160	2.92619e-157	Down Regulated in MdU1_PMA
ENSG00000170074	FAM153A	protein_coding	46.5456	-5.54066	0.762222	-7.26909	3.61911e-13	2.33168e-12	Down Regulated in MdU1_PMA
ENSG00000273155	ENSG00000273155	protein_coding	6.31609	-5.51362	1.28318	-4.29686	1.73235e-05	5.95073e-05	Down Regulated in MdU1_PMA
ENSG00000176105	YES1	protein_coding	395.625	-5.47317	0.860131	-6.36318	1.97618e-10	1.04835e-09	Down Regulated in MdU1_PMA
ENSG00000130720	FIBCD1	protein_coding	12.1863	-5.43942	0.901616	-6.03296	1.6098e-09	7.92852e-09	Down Regulated in MdU1_PMA
ENSG00000267618	ENSG00000267618	protein_coding	3.12092	-5.42054	1.88654	-2.87327	0.00406248	0.0100952	Down Regulated in MdU1_PMA
ENSG00000114107	CEP70	protein_coding	451.086	-5.41179	0.874803	-6.1863	6.15938e-10	3.13076e-09	Down Regulated in MdU1_PMA
ENSG00000184113	CLDN5	protein_coding	6.59915	-5.40943	1.02091	-5.29861	1.16686e-07	4.94172e-07	Down Regulated in MdU1_PMA
ENSG00000167800	TBX10	protein_coding	2.90625	-5.4007	1.4285	-3.78066	0.000156411	0.000477138	Down Regulated in MdU1_PMA
ENSG00000196415	PRTN3	protein_coding	1360.58	-5.36274	0.246944	-21.7164	1.43449e-104	1.48552e-102	Down Regulated in MdU1_PMA
ENSG00000102098	SCML2	protein_coding	529.002	-5.35987	0.208966	-25.6495	4.28513e-145	1.13938e-142	Down Regulated in MdU1_PMA
ENSG00000249662	LINC02218	protein_coding	9.67914	-5.31859	0.94152	-5.64894	1.61441e-08	7.34963e-08	Down Regulated in MdU1_PMA
ENSG00000162009	SSTR5	protein_coding	12.4176	-5.30056	0.762066	-6.95551	3.51298e-12	2.12681e-11	Down Regulated in MdU1_PMA
ENSG00000159958	TNFRSF13C	protein_coding	99.9176	-5.29175	0.522443	-10.1289	4.11446e-24	4.66069e-23	Down Regulated in MdU1_PMA
ENSG00000163884	KLF15	protein_coding	73.981	-5.25118	0.461566	-11.3769	5.45168e-30	7.81832e-29	Down Regulated in MdU1_PMA
ENSG00000169855	ROBO1	protein_coding	6.89774	-5.24123	4.22888	-1.23939	0.215201	0.361998	Non Significant
ENSG00000109674	NEIL3	protein_coding	378.41	-5.23364	0.23075	-22.681	6.90006e-114	8.53871e-112	Down Regulated in MdU1_PMA
ENSG00000140835	CHST4	protein_coding	3.57573	-5.22169	1.06238	-4.91509	8.87439e-07	3.46179e-06	Down Regulated in MdU1_PMA
ENSG00000285625	ENSG00000285625	protein_coding	5.47017	-5.21634	1.10236	-4.732	2.22323e-06	8.35452e-06	Down Regulated in MdU1_PMA
ENSG00000092621	PHGDH	protein_coding	8825.91	-5.18844	0.226098	-22.9478	1.55051e-116	2.00709e-114	Down Regulated in MdU1_PMA
ENSG00000164512	ANKRD55	protein_coding	24.9847	-5.15739	0.683034	-7.55071	4.32889e-14	2.96056e-13	Down Regulated in MdU1_PMA
ENSG00000145198	VWA5B2	protein_coding	8.44374	-5.08328	0.966145	-5.26141	1.42959e-07	6.00012e-07	Down Regulated in MdU1_PMA
ENSG00000129173	E2F8	protein_coding	993.459	-5.06664	0.169343	-29.9195	1.09913e-196	7.20882e-194	Down Regulated in MdU1_PMA
ENSG00000188626	GOLGA8M	protein_coding	26.046	-5.06534	0.853422	-5.93533	2.93256e-09	1.41702e-08	Down Regulated in MdU1_PMA
ENSG00000135925	WNT10A	protein_coding	9.34197	-5.06217	0.951712	-5.31902	1.04329e-07	4.43558e-07	Down Regulated in MdU1_PMA
ENSG00000211689	TRGC1	TR_C_gene	69.34	-5.0532	0.37335	-13.5348	9.75011e-42	2.09207e-40	Down Regulated in MdU1_PMA
ENSG00000171680	PLEKHG5	protein_coding	8.11948	-5.0385	1.63064	-3.08989	0.00200228	0.00522643	Down Regulated in MdU1_PMA
ENSG00000117091	CD48	protein_coding	111.107	-5.02827	0.406788	-12.3609	4.25315e-35	7.1771e-34	Down Regulated in MdU1_PMA
ENSG00000278023	RDM1	protein_coding	65.6309	-5.01657	0.470578	-10.6604	1.55861e-26	1.96082e-25	Down Regulated in MdU1_PMA
ENSG00000184986	TMEM121	protein_coding	9.20809	-5.01192	0.801555	-6.25274	4.0331e-10	2.09105e-09	Down Regulated in MdU1_PMA
ENSG00000184785	SMIM10	protein_coding	103.606	-5.01059	0.318968	-15.7087	1.31755e-55	4.29919e-54	Down Regulated in MdU1_PMA
ENSG00000144354	CDCA7	protein_coding	1330.67	-5.00732	0.205232	-24.3983	1.78375e-131	3.28009e-129	Down Regulated in MdU1_PMA
ENSG00000171798	KNDC1	protein_coding	4.38447	-4.98541	2.11162	-2.36094	0.0182286	0.0403953	Down Regulated in MdU1_PMA
ENSG00000203943	SAMD13	protein_coding	81.2275	-4.97376	0.577241	-8.61645	6.90618e-18	5.82951e-17	Down Regulated in MdU1_PMA
ENSG00000126500	FLRT1	protein_coding	227.723	-4.95087	0.326444	-15.166	5.93535e-52	1.70239e-50	Down Regulated in MdU1_PMA
ENSG00000108001	EBF3	protein_coding	65.517	-4.93526	0.307599	-16.0445	6.25042e-58	2.13884e-56	Down Regulated in MdU1_PMA
ENSG00000159450	TCHH	protein_coding	128.88	-4.91353	0.448443	-10.9569	6.16052e-28	8.21792e-27	Down Regulated in MdU1_PMA
ENSG00000118513	MYB	protein_coding	9060.4	-4.89299	0.109028	-44.8783	0	0	Down Regulated in MdU1_PMA
ENSG00000167513	CDT1	protein_coding	1856.57	-4.86003	0.210074	-23.1348	2.06585e-118	2.80328e-116	Down Regulated in MdU1_PMA
ENSG00000100162	CENPM	protein_coding	356.023	-4.85552	0.283005	-17.157	5.57141e-66	2.34739e-64	Down Regulated in MdU1_PMA
ENSG00000077935	SMC1B	protein_coding	129.285	-4.85115	0.289481	-16.7581	4.94221e-63	1.9256e-61	Down Regulated in MdU1_PMA
ENSG00000171435	KSR2	protein_coding	8.61884	-4.84161	2.79558	-1.73188	0.0832944	0.158978	Non Significant
ENSG00000113296	THBS4	protein_coding	31.9396	-4.83685	0.605597	-7.98691	1.38361e-15	1.03004e-14	Down Regulated in MdU1_PMA
ENSG00000182107	TMEM30B	protein_coding	1.7284	-4.81796	3.78133	-1.27414	0.202613	0.344653	Non Significant
ENSG00000151136	ABTB3	protein_coding	105.443	-4.81716	0.347432	-13.865	1.03163e-43	2.34934e-42	Down Regulated in MdU1_PMA
ENSG00000174332	GLIS1	protein_coding	11.8749	-4.81129	0.938214	-5.12813	2.92627e-07	1.19853e-06	Down Regulated in MdU1_PMA
ENSG00000234965	SHISA8	protein_coding	1.98009	-4.77791	2.00247	-2.38601	0.0170323	0.0379403	Down Regulated in MdU1_PMA
ENSG00000109819	PPARGC1A	protein_coding	608.417	-4.77201	0.220792	-21.6131	1.35155e-103	1.36374e-101	Down Regulated in MdU1_PMA
ENSG00000289721	PYDC5	protein_coding	15.4833	-4.76825	0.691816	-6.89236	5.48732e-12	3.27873e-11	Down Regulated in MdU1_PMA
ENSG00000149926	TLCD3B	protein_coding	27.0545	-4.75769	0.613532	-7.75459	8.86306e-15	6.33453e-14	Down Regulated in MdU1_PMA
ENSG00000179873	NLRP11	protein_coding	3.90224	-4.75072	1.24676	-3.81045	0.000138713	0.00042599	Down Regulated in MdU1_PMA
ENSG00000151079	KCNA6	protein_coding	214.479	-4.74799	0.728419	-6.51821	7.1152e-11	3.90512e-10	Down Regulated in MdU1_PMA
ENSG00000109625	CPZ	protein_coding	28.148	-4.74718	0.709709	-6.6889	2.24849e-11	1.28422e-10	Down Regulated in MdU1_PMA
ENSG00000176046	NUPR1	protein_coding	1.66214	-4.73216	2.46993	-1.91591	0.0553762	0.110494	Non Significant
ENSG00000167799	NUDT8	protein_coding	196.359	-4.71211	0.402675	-11.702	1.24457e-31	1.89098e-30	Down Regulated in MdU1_PMA
ENSG00000134247	PTGFRN	protein_coding	3.01174	-4.71092	1.21995	-3.86156	0.000112668	0.00035049	Down Regulated in MdU1_PMA
ENSG00000274049	INO80B-WBP1	protein_coding	8.17655	-4.69479	2.43746	-1.9261	0.0540919	0.108239	Non Significant
ENSG00000141384	TAF4B	protein_coding	489.568	-4.68299	0.20726	-22.5947	4.88481e-113	5.89653e-111	Down Regulated in MdU1_PMA
ENSG00000135919	SERPINE2	protein_coding	1254.24	-4.68084	0.216224	-21.648	6.34252e-104	6.46609e-102	Down Regulated in MdU1_PMA
ENSG00000162763	LRRC52	protein_coding	6.62362	-4.67447	1.04697	-4.46477	8.01566e-06	2.85666e-05	Down Regulated in MdU1_PMA
ENSG00000143476	DTL	protein_coding	988.704	-4.67234	0.262635	-17.7902	8.4125e-71	4.17991e-69	Down Regulated in MdU1_PMA
ENSG00000102935	ZNF423	protein_coding	5.52675	-4.67128	2.9267	-1.59609	0.110469	0.203627	Non Significant
ENSG00000151014	NOCT	protein_coding	204.27	-4.6553	0.302303	-15.3995	1.65064e-53	5.01202e-52	Down Regulated in MdU1_PMA
ENSG00000103154	NECAB2	protein_coding	4.1093	-4.64924	1.31935	-3.5239	0.000425242	0.00123154	Down Regulated in MdU1_PMA
ENSG00000140538	NTRK3	protein_coding	112.046	-4.62391	0.84534	-5.46988	4.50348e-08	1.97439e-07	Down Regulated in MdU1_PMA
ENSG00000159496	RGL4	protein_coding	43.539	-4.62123	0.44164	-10.4638	1.26679e-25	1.5386e-24	Down Regulated in MdU1_PMA
ENSG00000165105	RASEF	protein_coding	1.65218	-4.62038	2.49913	-1.8488	0.0644872	0.126708	Non Significant
ENSG00000187783	TMEM72	protein_coding	564.901	-4.6136	0.230776	-19.9917	6.5063e-89	5.02031e-87	Down Regulated in MdU1_PMA
ENSG00000135100	HNF1A	protein_coding	2.79369	-4.60531	1.42206	-3.23847	0.00120172	0.00324083	Down Regulated in MdU1_PMA
ENSG00000260092	ENSG00000260092	protein_coding	1.89221	-4.57793	1.70059	-2.69196	0.00710326	0.0169802	Down Regulated in MdU1_PMA
ENSG00000107485	GATA3	protein_coding	8.25166	-4.57424	0.962174	-4.75407	1.9936e-06	7.51904e-06	Down Regulated in MdU1_PMA
ENSG00000250803	ENSG00000250803	protein_coding	1.39258	-4.57122	3.96787	-1.15206	0.249297	0.40996	Non Significant
ENSG00000255587	RAB44	protein_coding	1516.87	-4.56011	0.227024	-20.0865	9.68701e-90	7.56356e-88	Down Regulated in MdU1_PMA
ENSG00000115457	IGFBP2	protein_coding	1333.44	-4.54868	0.255182	-17.8252	4.50477e-71	2.27272e-69	Down Regulated in MdU1_PMA
ENSG00000104055	TGM5	protein_coding	456.452	-4.52735	0.215855	-20.974	1.13279e-97	1.01312e-95	Down Regulated in MdU1_PMA
ENSG00000121211	MND1	protein_coding	461.639	-4.5182	0.30018	-15.0516	3.36879e-51	9.42877e-50	Down Regulated in MdU1_PMA
ENSG00000291313	ENSG00000291313	protein_coding	8.4828	-4.51786	4.23626	-1.06647	0.286209	0.45941	Non Significant
ENSG00000080709	KCNN2	protein_coding	158.711	-4.51454	0.290684	-15.5308	2.14782e-54	6.71867e-53	Down Regulated in MdU1_PMA
ENSG00000187997	C17orf99	protein_coding	3.60305	-4.5124	1.16534	-3.87219	0.000107861	0.00033591	Down Regulated in MdU1_PMA
ENSG00000185028	LRRC14B	protein_coding	1.46592	-4.51111	1.80406	-2.50054	0.0124005	0.0284472	Down Regulated in MdU1_PMA
ENSG00000278195	SSTR3	protein_coding	41.0371	-4.50119	0.809781	-5.55852	2.72066e-08	1.21442e-07	Down Regulated in MdU1_PMA
ENSG00000214940	NPIPA8	protein_coding	57.6988	-4.47556	1.36702	-3.27395	0.00106057	0.00288827	Down Regulated in MdU1_PMA
ENSG00000131153	GINS2	protein_coding	733.07	-4.47264	0.237901	-18.8004	7.49249e-79	4.66526e-77	Down Regulated in MdU1_PMA
ENSG00000174963	ZIC4	protein_coding	3.7088	-4.46881	2.12475	-2.10322	0.0354462	0.0739989	Non Significant
ENSG00000135116	HRK	protein_coding	7.38171	-4.46591	0.682322	-6.54516	5.94306e-11	3.28378e-10	Down Regulated in MdU1_PMA
ENSG00000156509	FBXO43	protein_coding	390.692	-4.45539	0.220531	-20.203	9.20547e-91	7.3035e-89	Down Regulated in MdU1_PMA
ENSG00000105492	SIGLEC6	protein_coding	450.512	-4.44566	0.236119	-18.828	4.45162e-79	2.78064e-77	Down Regulated in MdU1_PMA
ENSG00000142611	PRDM16	protein_coding	4.60795	-4.43759	4.235	-1.04784	0.294713	0.470957	Non Significant
ENSG00000176890	TYMS	protein_coding	2859.14	-4.43199	0.236014	-18.7785	1.13147e-78	6.97893e-77	Down Regulated in MdU1_PMA
ENSG00000164076	CAMKV	protein_coding	75.5524	-4.4305	0.273912	-16.1749	7.58158e-59	2.67339e-57	Down Regulated in MdU1_PMA
ENSG00000168078	PBK	protein_coding	453.172	-4.4287	0.216925	-20.4158	1.21095e-92	9.80522e-91	Down Regulated in MdU1_PMA
ENSG00000165480	SKA3	protein_coding	461.939	-4.42487	0.190684	-23.2052	4.03547e-119	5.63134e-117	Down Regulated in MdU1_PMA
ENSG00000157168	NRG1	protein_coding	3.92064	-4.41678	4.22627	-1.04508	0.295987	0.472714	Non Significant
ENSG00000129682	FGF13	protein_coding	12.1362	-4.41546	0.760319	-5.80738	6.34576e-09	2.98992e-08	Down Regulated in MdU1_PMA
ENSG00000109084	TMEM97	protein_coding	930.952	-4.4087	0.17976	-24.5254	7.91188e-133	1.52622e-130	Down Regulated in MdU1_PMA
ENSG00000169291	SHE	protein_coding	20.8916	-4.40815	0.805536	-5.47232	4.44188e-08	1.94912e-07	Down Regulated in MdU1_PMA
ENSG00000259316	ENSG00000259316	protein_coding	599.706	-4.40403	0.188822	-23.3237	2.54744e-120	3.68554e-118	Down Regulated in MdU1_PMA
ENSG00000225526	MKRN2OS	protein_coding	6.65014	-4.39979	1.01678	-4.32717	1.51036e-05	5.22539e-05	Down Regulated in MdU1_PMA
ENSG00000036828	CASR	protein_coding	3.95072	-4.39771	1.33842	-3.28576	0.00101708	0.00277906	Down Regulated in MdU1_PMA
ENSG00000113356	POLR3G	protein_coding	145.405	-4.39427	0.296537	-14.8186	1.11059e-49	2.97711e-48	Down Regulated in MdU1_PMA
ENSG00000085563	ABCB1	protein_coding	2.16471	-4.37565	2.60179	-1.68178	0.092611	0.174542	Non Significant
ENSG00000167971	CASKIN1	protein_coding	28.5924	-4.36592	0.622387	-7.0148	2.30276e-12	1.41238e-11	Down Regulated in MdU1_PMA
ENSG00000088756	ARHGAP28	protein_coding	1.25506	-4.35323	3.94776	-1.10271	0.270154	0.438288	Non Significant
ENSG00000119866	BCL11A	protein_coding	940.74	-4.34719	0.225703	-19.2607	1.14909e-82	7.76958e-81	Down Regulated in MdU1_PMA
ENSG00000197561	ELANE	protein_coding	910.171	-4.34688	0.247114	-17.5905	2.91093e-69	1.34766e-67	Down Regulated in MdU1_PMA
ENSG00000146122	DAAM2	protein_coding	9.3553	-4.34276	1.22236	-3.55277	0.000381201	0.00111102	Down Regulated in MdU1_PMA
ENSG00000112218	GPR63	protein_coding	224.828	-4.33576	0.301677	-14.3722	7.73187e-47	1.92817e-45	Down Regulated in MdU1_PMA
ENSG00000272573	MUSTN1	protein_coding	6.76626	-4.32403	1.53525	-2.8165	0.00485501	0.0118953	Down Regulated in MdU1_PMA
ENSG00000285629	ENSG00000285629	protein_coding	4.73535	-4.31918	1.90724	-2.26462	0.0235361	0.050968	Non Significant
ENSG00000254521	SIGLEC12	protein_coding	1048.14	-4.31764	0.215654	-20.0211	3.60619e-89	2.79352e-87	Down Regulated in MdU1_PMA
ENSG00000117148	ACTL8	protein_coding	17.3031	-4.3163	0.620331	-6.95805	3.45008e-12	2.09002e-11	Down Regulated in MdU1_PMA
ENSG00000093009	CDC45	protein_coding	901.993	-4.3128	0.186262	-23.1545	1.31034e-118	1.79044e-116	Down Regulated in MdU1_PMA
ENSG00000136997	MYC	protein_coding	3982.43	-4.30297	0.136838	-31.4458	4.79805e-217	4.72032e-214	Down Regulated in MdU1_PMA
ENSG00000161860	SYCE2	protein_coding	136.076	-4.29262	0.286608	-14.9773	1.033e-50	2.85468e-49	Down Regulated in MdU1_PMA
ENSG00000285839	ENSG00000285839	protein_coding	1.8439	-4.29151	2.93863	-1.46038	0.144186	0.257207	Non Significant
ENSG00000167646	DNAAF3	protein_coding	52.975	-4.28714	0.365125	-11.7416	7.80261e-32	1.19474e-30	Down Regulated in MdU1_PMA
ENSG00000100116	GCAT	protein_coding	272.302	-4.28467	0.300742	-14.247	4.67867e-46	1.13511e-44	Down Regulated in MdU1_PMA
ENSG00000138002	IFT172	protein_coding	50.5073	-4.2827	1.06157	-4.03433	5.47589e-05	0.000176948	Down Regulated in MdU1_PMA
ENSG00000147862	NFIB	protein_coding	11.8633	-4.28021	0.714494	-5.99056	2.09125e-09	1.02002e-08	Down Regulated in MdU1_PMA
ENSG00000162949	CAPN13	protein_coding	1.49554	-4.2758	1.75667	-2.43403	0.0149318	0.0336732	Down Regulated in MdU1_PMA
ENSG00000169397	RNASE3	protein_coding	467.896	-4.27342	0.283114	-15.0943	1.7652e-51	4.99741e-50	Down Regulated in MdU1_PMA
ENSG00000036530	CYP46A1	protein_coding	407.568	-4.2711	0.193326	-22.0927	3.71438e-108	4.17624e-106	Down Regulated in MdU1_PMA
ENSG00000035499	DEPDC1B	protein_coding	907.809	-4.26161	0.17083	-24.9466	2.32727e-137	5.08794e-135	Down Regulated in MdU1_PMA
ENSG00000228075	BOD1L2	protein_coding	2.39124	-4.25586	1.11257	-3.82525	0.00013064	0.000402581	Down Regulated in MdU1_PMA
ENSG00000101890	GUCY2F	protein_coding	4.60447	-4.25251	1.09309	-3.89037	0.000100091	0.0003127	Down Regulated in MdU1_PMA
ENSG00000263513	FAM72C	protein_coding	324.291	-4.25086	0.23418	-18.1521	1.23514e-73	6.65827e-72	Down Regulated in MdU1_PMA
ENSG00000054654	SYNE2	protein_coding	4.18104	-4.2231	1.24528	-3.39128	0.000695673	0.0019518	Down Regulated in MdU1_PMA
ENSG00000177103	DSCAML1	protein_coding	3.49014	-4.20819	1.90723	-2.20644	0.0273533	0.0584433	Non Significant
ENSG00000175183	CSRP2	protein_coding	17.3941	-4.20067	0.789985	-5.3174	1.0526e-07	4.47417e-07	Down Regulated in MdU1_PMA
ENSG00000178795	GDPD4	protein_coding	2.26682	-4.19117	1.67609	-2.50056	0.0123998	0.0284472	Down Regulated in MdU1_PMA
ENSG00000116761	CTH	protein_coding	399.891	-4.18728	0.176238	-23.7593	8.81458e-125	1.4453e-122	Down Regulated in MdU1_PMA
ENSG00000169181	GSG1L	protein_coding	1.79166	-4.18712	1.71225	-2.44538	0.0144698	0.0327364	Down Regulated in MdU1_PMA
ENSG00000186710	CFAP73	protein_coding	2.86929	-4.18581	1.09435	-3.82494	0.000130805	0.000402961	Down Regulated in MdU1_PMA
ENSG00000171811	CFAP46	protein_coding	2.09595	-4.17123	2.94355	-1.41707	0.156461	0.276101	Non Significant
ENSG00000166803	PCLAF	protein_coding	2611.63	-4.16887	0.200241	-20.8193	2.89567e-96	2.49891e-94	Down Regulated in MdU1_PMA
ENSG00000106633	GCK	protein_coding	4.02371	-4.15619	2.0922	-1.98651	0.0469762	0.0952008	Non Significant
ENSG00000077984	CST7	protein_coding	1404.2	-4.14245	0.233577	-17.7348	2.25721e-70	1.09661e-68	Down Regulated in MdU1_PMA
ENSG00000134874	DZIP1	protein_coding	344.3	-4.14005	0.920024	-4.49993	6.79745e-06	2.44063e-05	Down Regulated in MdU1_PMA
ENSG00000101255	TRIB3	protein_coding	1863.55	-4.13921	0.211628	-19.5589	3.46414e-85	2.45181e-83	Down Regulated in MdU1_PMA
ENSG00000128242	GAL3ST1	protein_coding	3.95939	-4.13651	1.27237	-3.25102	0.00114992	0.00311178	Down Regulated in MdU1_PMA
ENSG00000136982	DSCC1	protein_coding	564.86	-4.13569	0.169182	-24.4452	5.66069e-132	1.06076e-129	Down Regulated in MdU1_PMA
ENSG00000214357	NEURL1B	protein_coding	33.6667	-4.13387	0.437324	-9.45265	3.30345e-21	3.32509e-20	Down Regulated in MdU1_PMA
ENSG00000263961	RHEX	protein_coding	11.6624	-4.12675	1.02065	-4.04324	5.27186e-05	0.000170635	Down Regulated in MdU1_PMA
ENSG00000187607	ZNF286A	protein_coding	1.55495	-4.11889	1.78879	-2.30262	0.0213005	0.0465365	Down Regulated in MdU1_PMA
ENSG00000188064	WNT7B	protein_coding	3.4941	-4.11453	1.52083	-2.70546	0.00682101	0.0163551	Down Regulated in MdU1_PMA
ENSG00000268279	ENSG00000268279	protein_coding	3.08372	-4.09849	2.51776	-1.62783	0.103561	0.192542	Non Significant
ENSG00000179431	FJX1	protein_coding	39.4835	-4.09624	0.450166	-9.09941	9.08199e-20	8.5175e-19	Down Regulated in MdU1_PMA
ENSG00000128408	RIBC2	protein_coding	27.0144	-4.0943	0.569385	-7.19074	6.44399e-13	4.0927e-12	Down Regulated in MdU1_PMA
ENSG00000204531	POU5F1	protein_coding	24.2834	-4.09167	0.613334	-6.67119	2.53743e-11	1.44255e-10	Down Regulated in MdU1_PMA
ENSG00000134207	SYT6	protein_coding	14.1868	-4.08584	0.944235	-4.32714	1.51057e-05	5.22539e-05	Down Regulated in MdU1_PMA
ENSG00000234602	MCIDAS	protein_coding	25.5895	-4.08484	0.47466	-8.60582	7.57757e-18	6.38528e-17	Down Regulated in MdU1_PMA
ENSG00000158966	CACHD1	protein_coding	40.6266	-4.08297	0.978164	-4.17412	2.99143e-05	9.97955e-05	Down Regulated in MdU1_PMA
ENSG00000233024	NPIPA9	protein_coding	347.601	-4.07306	0.352463	-11.556	6.88384e-31	1.0207e-29	Down Regulated in MdU1_PMA
ENSG00000196781	TLE1	protein_coding	46.7491	-4.0729	0.656294	-6.20591	5.43804e-10	2.78208e-09	Down Regulated in MdU1_PMA
ENSG00000122733	PHF24	protein_coding	8.46722	-4.07285	0.997571	-4.08277	4.45028e-05	0.0001456	Down Regulated in MdU1_PMA
ENSG00000136895	GARNL3	protein_coding	13.3307	-4.07243	0.89441	-4.5532	5.28352e-06	1.92018e-05	Down Regulated in MdU1_PMA
ENSG00000062038	CDH3	protein_coding	7.42793	-4.06962	1.0605	-3.83744	0.000124325	0.000384383	Down Regulated in MdU1_PMA
ENSG00000128591	FLNC	protein_coding	34.7294	-4.0568	0.466896	-8.68886	3.66094e-18	3.14279e-17	Down Regulated in MdU1_PMA
ENSG00000161896	IP6K3	protein_coding	0.910086	-4.04663	3.58556	-1.12859	0.259071	0.423203	Non Significant
ENSG00000176092	CRYBG2	protein_coding	2.20835	-4.03851	1.98492	-2.0346	0.0418912	0.0858952	Non Significant
ENSG00000135069	PSAT1	protein_coding	3836.15	-4.03425	0.142016	-28.407	1.65835e-177	7.95849e-175	Down Regulated in MdU1_PMA
ENSG00000154839	SKA1	protein_coding	647.066	-4.03142	0.197874	-20.3736	2.86584e-92	2.30156e-90	Down Regulated in MdU1_PMA
ENSG00000165323	FAT3	protein_coding	5.33127	-4.02275	1.28188	-3.13816	0.0017001	0.00448346	Down Regulated in MdU1_PMA
ENSG00000100206	DMC1	protein_coding	49.938	-4.02158	0.56694	-7.09348	1.30779e-12	8.10717e-12	Down Regulated in MdU1_PMA
ENSG00000243710	CFAP57	protein_coding	3.27234	-4.01985	1.31225	-3.06334	0.00218884	0.005678	Down Regulated in MdU1_PMA
ENSG00000165244	ZNF367	protein_coding	419.007	-4.01948	0.179586	-22.3819	5.90093e-111	6.91111e-109	Down Regulated in MdU1_PMA
ENSG00000196584	XRCC2	protein_coding	749.963	-4.00994	0.242703	-16.522	2.54683e-61	9.45498e-60	Down Regulated in MdU1_PMA
ENSG00000120256	LRP11	protein_coding	817.924	-4.00759	0.173922	-23.0425	1.7491e-117	2.30975e-115	Down Regulated in MdU1_PMA
ENSG00000265190	ANXA8	protein_coding	1.77646	-4.00466	1.85335	-2.16077	0.0307129	0.0650141	Non Significant
ENSG00000119969	HELLS	protein_coding	606.901	-4.00054	0.166952	-23.9622	6.89445e-127	1.15945e-124	Down Regulated in MdU1_PMA
ENSG00000007968	E2F2	protein_coding	349.508	-3.99986	0.272392	-14.6842	8.13938e-49	2.13534e-47	Down Regulated in MdU1_PMA
ENSG00000173918	C1QTNF1	protein_coding	2.14113	-3.99961	2.97349	-1.34509	0.178595	0.309444	Non Significant
ENSG00000005249	PRKAR2B	protein_coding	757.067	-3.99015	0.198431	-20.1085	6.21955e-90	4.87554e-88	Down Regulated in MdU1_PMA
ENSG00000160183	TMPRSS3	protein_coding	2.79986	-3.98712	1.26725	-3.14626	0.0016537	0.00436814	Down Regulated in MdU1_PMA
ENSG00000164109	MAD2L1	protein_coding	1598.82	-3.97477	0.179299	-22.1684	6.93345e-109	7.93154e-107	Down Regulated in MdU1_PMA
ENSG00000116035	VAX2	protein_coding	1.20465	-3.96905	2.55324	-1.55452	0.120061	0.219201	Non Significant
ENSG00000021852	C8B	protein_coding	0.74856	-3.96391	3.20894	-1.23527	0.21673	0.363948	Non Significant
ENSG00000127423	AUNIP	protein_coding	368.959	-3.95604	0.161488	-24.4975	1.57201e-132	2.97413e-130	Down Regulated in MdU1_PMA
ENSG00000125508	SRMS	protein_coding	1.22768	-3.95491	2.21041	-1.78922	0.073579	0.142172	Non Significant
ENSG00000104738	MCM4	protein_coding	5202.97	-3.95406	0.206034	-19.1913	4.37174e-82	2.93578e-80	Down Regulated in MdU1_PMA
ENSG00000166897	ELFN2	protein_coding	156.402	-3.94552	0.371961	-10.6073	2.75509e-26	3.43096e-25	Down Regulated in MdU1_PMA
ENSG00000154319	FAM167A	protein_coding	4.61023	-3.93944	0.967907	-4.07006	4.70003e-05	0.000153084	Down Regulated in MdU1_PMA
ENSG00000166455	C16orf46	protein_coding	11.7704	-3.93421	0.797471	-4.93336	8.08259e-07	3.16778e-06	Down Regulated in MdU1_PMA
ENSG00000178999	AURKB	protein_coding	692.771	-3.92318	0.184186	-21.3	1.13473e-100	1.08912e-98	Down Regulated in MdU1_PMA
ENSG00000196700	ZNF512B	protein_coding	14.0204	-3.91974	0.595509	-6.58216	4.63648e-11	2.57996e-10	Down Regulated in MdU1_PMA
ENSG00000228727	SAPCD1	protein_coding	54.1247	-3.91753	0.479783	-8.16521	3.20885e-16	2.48866e-15	Down Regulated in MdU1_PMA
ENSG00000101871	MID1	protein_coding	25.2215	-3.9144	0.57491	-6.80871	9.84755e-12	5.796e-11	Down Regulated in MdU1_PMA
ENSG00000183454	GRIN2A	protein_coding	3.89852	-3.91153	1.84313	-2.12222	0.0338194	0.0709718	Non Significant
ENSG00000187140	FOXD3	protein_coding	1.99784	-3.91126	2.08632	-1.87471	0.0608319	0.120234	Non Significant
ENSG00000163808	KIF15	protein_coding	1328.99	-3.90816	0.222987	-17.5264	9.01669e-69	4.10677e-67	Down Regulated in MdU1_PMA
ENSG00000204540	PSORS1C1	protein_coding	0.956746	-3.90134	2.64178	-1.47679	0.139733	0.250286	Non Significant
ENSG00000284491	THSD8	protein_coding	2.74875	-3.8935	1.17529	-3.3128	0.00092367	0.00254113	Down Regulated in MdU1_PMA
ENSG00000136011	STAB2	protein_coding	4.16783	-3.89291	1.53629	-2.53397	0.0112778	0.0260631	Down Regulated in MdU1_PMA
ENSG00000133083	DCLK1	protein_coding	1.97148	-3.8876	3.33521	-1.16562	0.243766	0.402209	Non Significant
ENSG00000143228	NUF2	protein_coding	697.146	-3.88726	0.209175	-18.5838	4.34692e-77	2.56078e-75	Down Regulated in MdU1_PMA
ENSG00000127863	TNFRSF19	protein_coding	15.7208	-3.87932	0.498613	-7.78022	7.24014e-15	5.19916e-14	Down Regulated in MdU1_PMA
ENSG00000172232	AZU1	protein_coding	2686.42	-3.87729	0.213785	-18.1364	1.64434e-73	8.81584e-72	Down Regulated in MdU1_PMA
ENSG00000099139	PCSK5	protein_coding	29.2501	-3.87504	0.435697	-8.89389	5.90062e-19	5.34041e-18	Down Regulated in MdU1_PMA
ENSG00000174371	EXO1	protein_coding	423.28	-3.87295	0.192509	-20.1183	5.09831e-90	4.01258e-88	Down Regulated in MdU1_PMA
ENSG00000101311	FERMT1	protein_coding	254.117	-3.87133	0.231878	-16.6956	1.41096e-62	5.40117e-61	Down Regulated in MdU1_PMA
ENSG00000165716	DIPK1B	protein_coding	53.9889	-3.86785	0.36166	-10.6947	1.07722e-26	1.36481e-25	Down Regulated in MdU1_PMA
ENSG00000132199	ENOSF1	protein_coding	862.227	-3.8668	0.173425	-22.2966	3.98458e-110	4.63909e-108	Down Regulated in MdU1_PMA
ENSG00000075673	ATP12A	protein_coding	1.32875	-3.86417	2.08198	-1.856	0.0634529	0.1249	Non Significant
ENSG00000131094	C1QL1	protein_coding	4.94718	-3.85986	0.86458	-4.46443	8.02811e-06	2.86058e-05	Down Regulated in MdU1_PMA
ENSG00000174721	FGFBP3	protein_coding	57.533	-3.85912	0.342295	-11.2742	1.75896e-29	2.46857e-28	Down Regulated in MdU1_PMA
ENSG00000132164	SLC6A11	protein_coding	3.20948	-3.85868	1.3129	-2.93904	0.00329231	0.00828595	Down Regulated in MdU1_PMA
ENSG00000251380	DCANP1	protein_coding	1.29818	-3.85735	4.24848	-0.907935	0.363912	0.561463	Non Significant
ENSG00000235162	C12orf75	protein_coding	576.745	-3.85628	0.263837	-14.6161	2.21629e-48	5.74541e-47	Down Regulated in MdU1_PMA
ENSG00000196091	MYBPC1	protein_coding	4.18339	-3.85528	1.54097	-2.50184	0.0123548	0.0283491	Down Regulated in MdU1_PMA
ENSG00000174502	SLC26A9	protein_coding	1019.47	-3.85468	0.211109	-18.2591	1.75028e-74	9.61971e-73	Down Regulated in MdU1_PMA
ENSG00000184005	ST6GALNAC3	protein_coding	446.793	-3.85319	0.217572	-17.71	3.51244e-70	1.69389e-68	Down Regulated in MdU1_PMA
ENSG00000047457	CP	protein_coding	26.356	-3.84674	0.850452	-4.52317	6.09196e-06	2.20019e-05	Down Regulated in MdU1_PMA
ENSG00000127412	TRPV5	protein_coding	1.88964	-3.83917	1.52971	-2.50973	0.0120823	0.0277723	Down Regulated in MdU1_PMA
ENSG00000165730	STOX1	protein_coding	7.76268	-3.82894	1.06233	-3.6043	0.000312998	0.0009218	Down Regulated in MdU1_PMA
ENSG00000169607	CKAP2L	protein_coding	713.585	-3.82593	0.194359	-19.6849	2.90648e-86	2.12594e-84	Down Regulated in MdU1_PMA
ENSG00000078114	NEBL	protein_coding	6.873	-3.80822	1.44399	-2.6373	0.00835695	0.0197468	Down Regulated in MdU1_PMA
ENSG00000145386	CCNA2	protein_coding	1922.93	-3.80745	0.165494	-23.0066	4.00653e-117	5.2555e-115	Down Regulated in MdU1_PMA
ENSG00000140534	TICRR	protein_coding	578.269	-3.79839	0.166176	-22.8576	1.22742e-115	1.56823e-113	Down Regulated in MdU1_PMA
ENSG00000116157	GPX7	protein_coding	2.80419	-3.79083	1.21716	-3.11448	0.0018427	0.00483616	Down Regulated in MdU1_PMA
ENSG00000105877	DNAH11	protein_coding	40.4218	-3.78829	0.60235	-6.28918	3.19154e-10	1.66791e-09	Down Regulated in MdU1_PMA
ENSG00000007062	PROM1	protein_coding	7.73042	-3.78604	1.20978	-3.12953	0.00175085	0.00460927	Down Regulated in MdU1_PMA
ENSG00000130283	GDF1	protein_coding	24.7045	-3.78518	2.99976	-1.26183	0.207011	0.350709	Non Significant
ENSG00000125384	PTGER2	protein_coding	676.274	-3.78457	0.160002	-23.6532	1.09382e-123	1.76409e-121	Down Regulated in MdU1_PMA
ENSG00000161888	SPC24	protein_coding	537.497	-3.78419	0.218423	-17.325	3.04541e-67	1.33456e-65	Down Regulated in MdU1_PMA
ENSG00000153044	CENPH	protein_coding	2437.28	-3.78204	0.157132	-24.0692	5.26022e-128	9.15931e-126	Down Regulated in MdU1_PMA
ENSG00000289746	TARP	protein_coding	53.0397	-3.78002	0.438491	-8.62052	6.66498e-18	5.63317e-17	Down Regulated in MdU1_PMA
ENSG00000075043	KCNQ2	protein_coding	8.12325	-3.77921	4.18295	-0.90348	0.366271	0.56435	Non Significant
ENSG00000122966	CIT	protein_coding	1476.92	-3.77298	0.250467	-15.0638	2.80166e-51	7.85263e-50	Down Regulated in MdU1_PMA
ENSG00000185559	DLK1	protein_coding	240.256	-3.76959	0.232102	-16.2411	2.58404e-59	9.21079e-58	Down Regulated in MdU1_PMA
ENSG00000164070	HSPA4L	protein_coding	286.76	-3.76927	0.215536	-17.4879	1.77147e-68	8.01275e-67	Down Regulated in MdU1_PMA
ENSG00000261915	ENSG00000261915	protein_coding	0.986863	-3.76855	2.30506	-1.6349	0.102069	0.190073	Non Significant
ENSG00000006468	ETV1	protein_coding	9.04484	-3.76184	1.04786	-3.59002	0.000330655	0.000970461	Down Regulated in MdU1_PMA
ENSG00000276644	DACH1	protein_coding	1.06818	-3.76155	3.50249	-1.07397	0.282838	0.455039	Non Significant
ENSG00000120254	MTHFD1L	protein_coding	1662.57	-3.7552	0.154785	-24.2607	5.09734e-130	9.2014e-128	Down Regulated in MdU1_PMA
ENSG00000143674	MAP3K21	protein_coding	270.699	-3.75289	0.161153	-23.2877	5.90634e-120	8.48271e-118	Down Regulated in MdU1_PMA
ENSG00000108602	ALDH3A1	protein_coding	1.60019	-3.74817	2.11483	-1.77233	0.0763404	0.147061	Non Significant
ENSG00000205143	ARID3C	protein_coding	33.7478	-3.74533	0.319949	-11.706	1.18689e-31	1.80473e-30	Down Regulated in MdU1_PMA
ENSG00000077684	JADE1	protein_coding	664.723	-3.73704	0.115246	-32.4267	1.1547e-230	1.26222e-227	Down Regulated in MdU1_PMA
ENSG00000107282	APBA1	protein_coding	92.4809	-3.73519	0.413503	-9.03304	1.66974e-19	1.54898e-18	Down Regulated in MdU1_PMA
ENSG00000137124	ALDH1B1	protein_coding	451.808	-3.73065	0.242975	-15.3541	3.32686e-53	9.91807e-52	Down Regulated in MdU1_PMA
ENSG00000074935	TUBE1	protein_coding	769.442	-3.72863	0.1949	-19.131	1.39446e-81	9.23816e-80	Down Regulated in MdU1_PMA
ENSG00000256463	SALL3	protein_coding	3.34108	-3.72221	2.01753	-1.84493	0.0650471	0.127693	Non Significant
ENSG00000085999	RAD54L	protein_coding	603.139	-3.71859	0.210086	-17.7003	4.16979e-70	2.00109e-68	Down Regulated in MdU1_PMA
ENSG00000090447	TFAP4	protein_coding	310.305	-3.71206	0.211394	-17.5599	4.99748e-69	2.29208e-67	Down Regulated in MdU1_PMA
ENSG00000215474	SKOR2	protein_coding	2.35301	-3.71135	4.23986	-0.875347	0.381385	0.583117	Non Significant
ENSG00000111247	RAD51AP1	protein_coding	848.7	-3.7039	0.172495	-21.4725	2.81292e-102	2.78126e-100	Down Regulated in MdU1_PMA
ENSG00000140093	SERPINA10	protein_coding	3.88564	-3.6995	0.993895	-3.72222	0.000197478	0.000594945	Down Regulated in MdU1_PMA
ENSG00000197816	CCDC180	protein_coding	2.04614	-3.69866	1.70153	-2.17372	0.0297259	0.0631285	Non Significant
ENSG00000091656	ZFHX4	protein_coding	5.55546	-3.68841	1.52354	-2.42095	0.0154799	0.0348413	Down Regulated in MdU1_PMA
ENSG00000186094	AGBL4	protein_coding	278.999	-3.68388	0.924826	-3.98332	6.79596e-05	0.000217074	Down Regulated in MdU1_PMA
ENSG00000197299	BLM	protein_coding	1107.87	-3.68338	0.237993	-15.4768	4.97477e-54	1.52943e-52	Down Regulated in MdU1_PMA
ENSG00000101057	MYBL2	protein_coding	2157.66	-3.67833	0.213494	-17.2292	1.60244e-66	6.85428e-65	Down Regulated in MdU1_PMA
ENSG00000104901	DKKL1	protein_coding	7.76313	-3.67718	0.871206	-4.2208	2.4344e-05	8.21319e-05	Down Regulated in MdU1_PMA
ENSG00000080644	CHRNA3	protein_coding	7.44883	-3.67194	0.988169	-3.7159	0.000202484	0.00060928	Down Regulated in MdU1_PMA
ENSG00000284874	ENSG00000284874	protein_coding	4.38246	-3.66669	3.07341	-1.19304	0.232854	0.386799	Non Significant
ENSG00000120093	HOXB3	protein_coding	1.92988	-3.66374	1.69537	-2.16102	0.0306935	0.0649871	Non Significant
ENSG00000179598	PLD6	protein_coding	220.63	-3.66289	0.249494	-14.6813	8.49735e-49	2.22332e-47	Down Regulated in MdU1_PMA
ENSG00000276043	UHRF1	protein_coding	1307.76	-3.66039	0.154937	-23.6251	2.13012e-123	3.35298e-121	Down Regulated in MdU1_PMA
ENSG00000187037	GPR141	protein_coding	86.6875	-3.65942	0.389441	-9.39659	5.63623e-21	5.57559e-20	Down Regulated in MdU1_PMA
ENSG00000179002	TAS1R2	protein_coding	1.63516	-3.65873	1.98281	-1.84522	0.0650055	0.127624	Non Significant
ENSG00000164741	DLC1	protein_coding	3.76262	-3.65647	3.48209	-1.05008	0.293682	0.469795	Non Significant
ENSG00000196081	ZNF724	protein_coding	21.4976	-3.65546	0.579807	-6.30461	2.88918e-10	1.51351e-09	Down Regulated in MdU1_PMA
ENSG00000182667	NTM	protein_coding	3.14219	-3.65524	1.44523	-2.52917	0.0114333	0.0264008	Down Regulated in MdU1_PMA
ENSG00000110881	ASIC1	protein_coding	107.245	-3.65166	0.252572	-14.4579	2.23447e-47	5.6511e-46	Down Regulated in MdU1_PMA
ENSG00000131747	TOP2A	protein_coding	9934.66	-3.64958	0.141658	-25.7633	2.2859e-146	6.24687e-144	Down Regulated in MdU1_PMA
ENSG00000165092	ALDH1A1	protein_coding	7.62516	-3.64741	0.677492	-5.38369	7.29731e-08	3.13429e-07	Down Regulated in MdU1_PMA
ENSG00000111665	CDCA3	protein_coding	334.81	-3.64536	0.192329	-18.9538	4.10856e-80	2.62467e-78	Down Regulated in MdU1_PMA
ENSG00000198723	TEX45	protein_coding	5.20222	-3.64329	1.13755	-3.20275	0.00136121	0.00363604	Down Regulated in MdU1_PMA
ENSG00000101955	SRPX	protein_coding	125.604	-3.64303	0.222596	-16.3661	3.33884e-60	1.21209e-58	Down Regulated in MdU1_PMA
ENSG00000132854	KANK4	protein_coding	66.552	-3.6389	0.569964	-6.38443	1.72033e-10	9.17573e-10	Down Regulated in MdU1_PMA
ENSG00000082293	COL19A1	protein_coding	3.31255	-3.63725	2.21424	-1.64266	0.100453	0.187454	Non Significant
ENSG00000074803	SLC12A1	protein_coding	4.81718	-3.63505	1.14615	-3.17153	0.00151638	0.00402541	Down Regulated in MdU1_PMA
ENSG00000127325	BEST3	protein_coding	0.761138	-3.63499	2.49771	-1.45533	0.145578	0.25915	Non Significant
ENSG00000154102	C16orf74	protein_coding	193.521	-3.63474	0.24008	-15.1397	8.86217e-52	2.53448e-50	Down Regulated in MdU1_PMA
ENSG00000137135	ARHGEF39	protein_coding	165.662	-3.63382	0.211318	-17.196	2.84383e-66	1.20853e-64	Down Regulated in MdU1_PMA
ENSG00000171848	RRM2	protein_coding	2287.29	-3.63123	0.238367	-15.2338	2.11097e-52	6.17169e-51	Down Regulated in MdU1_PMA
ENSG00000182272	B4GALNT4	protein_coding	1.37777	-3.62947	3.31673	-1.09429	0.273827	0.443186	Non Significant
ENSG00000117322	CR2	protein_coding	2.71253	-3.6279	4.27343	-0.848943	0.395913	0.600569	Non Significant
ENSG00000167900	TK1	protein_coding	817.858	-3.62604	0.243865	-14.869	5.23691e-50	1.41735e-48	Down Regulated in MdU1_PMA
ENSG00000132744	ACY3	protein_coding	2.35276	-3.62284	1.2198	-2.97004	0.00297765	0.007551	Down Regulated in MdU1_PMA
ENSG00000085840	ORC1	protein_coding	1329.93	-3.6221	0.0991354	-36.5369	2.88206e-292	6.30081e-289	Down Regulated in MdU1_PMA
ENSG00000099958	DERL3	protein_coding	63.0113	-3.62051	0.442853	-8.1754	2.94876e-16	2.29237e-15	Down Regulated in MdU1_PMA
ENSG00000171388	APLN	protein_coding	24.8099	-3.61922	0.367566	-9.84645	7.10072e-23	7.67658e-22	Down Regulated in MdU1_PMA
ENSG00000262655	SPON1	protein_coding	3.62147	-3.61291	1.36288	-2.65093	0.00802701	0.0190128	Down Regulated in MdU1_PMA
ENSG00000176049	JAKMIP2	protein_coding	2.17158	-3.61164	2.20309	-1.63935	0.10114	0.188521	Non Significant
ENSG00000196839	ADA	protein_coding	952.289	-3.60356	0.218808	-16.469	6.12555e-61	2.25283e-59	Down Regulated in MdU1_PMA
ENSG00000129810	SGO1	protein_coding	487.739	-3.60321	0.182174	-19.779	4.51322e-87	3.32592e-85	Down Regulated in MdU1_PMA
ENSG00000065328	MCM10	protein_coding	632.308	-3.59865	0.170354	-21.1245	4.73289e-99	4.35161e-97	Down Regulated in MdU1_PMA
ENSG00000049540	ELN	protein_coding	1.15162	-3.5942	4.24453	-0.846783	0.397116	0.601977	Non Significant
ENSG00000241186	TDGF1	protein_coding	2.08389	-3.59379	2.033	-1.76773	0.0771058	0.14836	Non Significant
ENSG00000165490	DDIAS	protein_coding	439.104	-3.59095	0.185796	-19.3274	3.15949e-83	2.16607e-81	Down Regulated in MdU1_PMA
ENSG00000186185	KIF18B	protein_coding	774.203	-3.58726	0.240378	-14.9234	2.32175e-50	6.37137e-49	Down Regulated in MdU1_PMA
ENSG00000112742	TTK	protein_coding	1272.87	-3.58468	0.185409	-19.3339	2.78296e-83	1.9146e-81	Down Regulated in MdU1_PMA
ENSG00000107831	FGF8	protein_coding	1.5614	-3.58207	1.62594	-2.20308	0.0275894	0.058922	Non Significant
ENSG00000163596	ICA1L	protein_coding	21.8609	-3.57809	0.578492	-6.1852	6.20252e-10	3.15106e-09	Down Regulated in MdU1_PMA
ENSG00000133739	LRRCC1	protein_coding	467.726	-3.5748	0.179935	-19.8672	7.82216e-88	5.85205e-86	Down Regulated in MdU1_PMA
ENSG00000173848	NET1	protein_coding	1264.27	-3.57116	0.143202	-24.9379	2.8877e-137	6.24378e-135	Down Regulated in MdU1_PMA
ENSG00000148773	MKI67	protein_coding	8878.08	-3.56921	0.191817	-18.6073	2.80162e-77	1.66038e-75	Down Regulated in MdU1_PMA
ENSG00000181544	FANCB	protein_coding	274.545	-3.56903	0.245783	-14.5211	8.90892e-48	2.27948e-46	Down Regulated in MdU1_PMA
ENSG00000119915	ELOVL3	protein_coding	25.2648	-3.56673	0.537689	-6.63345	3.27934e-11	1.84777e-10	Down Regulated in MdU1_PMA
ENSG00000144712	CAND2	protein_coding	4.06981	-3.56401	0.930114	-3.8318	0.000127207	0.000392925	Down Regulated in MdU1_PMA
ENSG00000138778	CENPE	protein_coding	1003.76	-3.56219	0.183766	-19.3844	1.04521e-83	7.29272e-82	Down Regulated in MdU1_PMA
ENSG00000163810	TGM4	protein_coding	10.9121	-3.56131	0.792929	-4.49134	7.07773e-06	2.53617e-05	Down Regulated in MdU1_PMA
ENSG00000287080	H3C3	protein_coding	1.48901	-3.55937	1.43383	-2.48242	0.0130494	0.0297693	Down Regulated in MdU1_PMA
ENSG00000187268	FAM9C	protein_coding	42.284	-3.55773	0.586725	-6.06372	1.33009e-09	6.58715e-09	Down Regulated in MdU1_PMA
ENSG00000100479	POLE2	protein_coding	231.862	-3.55519	0.2785	-12.7655	2.55475e-37	4.70667e-36	Down Regulated in MdU1_PMA
ENSG00000091127	PUS7	protein_coding	295.476	-3.55399	0.230548	-15.4154	1.29048e-53	3.93667e-52	Down Regulated in MdU1_PMA
ENSG00000177551	NHLH2	protein_coding	2.46959	-3.55199	4.25051	-0.835662	0.403345	0.609212	Non Significant
ENSG00000180817	PPA1	protein_coding	3274.83	-3.54983	0.163559	-21.7036	1.89554e-104	1.9527e-102	Down Regulated in MdU1_PMA
ENSG00000166405	RIC3	protein_coding	12.4441	-3.54897	0.839917	-4.22538	2.38541e-05	8.05894e-05	Down Regulated in MdU1_PMA
ENSG00000141441	GAREM1	protein_coding	3.24223	-3.54719	1.51722	-2.33795	0.0193898	0.0427609	Down Regulated in MdU1_PMA
ENSG00000067191	CACNB1	protein_coding	26.0459	-3.5451	0.694247	-5.1064	3.2835e-07	1.33788e-06	Down Regulated in MdU1_PMA
ENSG00000181790	ADGRB1	protein_coding	205.437	-3.53233	0.442236	-7.98745	1.37761e-15	1.02596e-14	Down Regulated in MdU1_PMA
ENSG00000124006	OBSL1	protein_coding	4.32047	-3.52892	1.97919	-1.78301	0.0745842	0.143973	Non Significant
ENSG00000108924	HLF	protein_coding	9.60892	-3.52697	0.70526	-5.00094	5.70502e-07	2.27001e-06	Down Regulated in MdU1_PMA
ENSG00000160117	ANKLE1	protein_coding	623.754	-3.52602	0.139	-25.367	5.83475e-142	1.47185e-139	Down Regulated in MdU1_PMA
ENSG00000152253	SPC25	protein_coding	384.89	-3.52588	0.286612	-12.3019	8.84667e-35	1.4739e-33	Down Regulated in MdU1_PMA
ENSG00000183166	CALN1	protein_coding	76.297	-3.5245	0.735112	-4.79451	1.63077e-06	6.20039e-06	Down Regulated in MdU1_PMA
ENSG00000197245	FAM110D	protein_coding	19.4595	-3.52254	0.621657	-5.66637	1.45854e-08	6.67987e-08	Down Regulated in MdU1_PMA
ENSG00000187848	P2RX2	protein_coding	1.70331	-3.52205	1.40488	-2.50701	0.0121758	0.0279645	Down Regulated in MdU1_PMA
ENSG00000183395	PMCH	protein_coding	4.19099	-3.516	1.7261	-2.03696	0.0416541	0.0855072	Non Significant
ENSG00000051341	POLQ	protein_coding	804.184	-3.51487	0.245811	-14.2991	2.21639e-46	5.43084e-45	Down Regulated in MdU1_PMA
ENSG00000020181	ADGRA2	protein_coding	3941.49	-3.50549	0.149635	-23.427	2.26886e-121	3.43401e-119	Down Regulated in MdU1_PMA
ENSG00000159640	ACE	protein_coding	2.70915	-3.50387	1.85693	-1.88691	0.0591722	0.117272	Non Significant
ENSG00000137310	TCF19	protein_coding	1855.58	-3.50315	0.14021	-24.9851	8.87236e-138	2.00658e-135	Down Regulated in MdU1_PMA
ENSG00000163453	IGFBP7	protein_coding	1961.78	-3.50291	0.213801	-16.384	2.48704e-60	9.06203e-59	Down Regulated in MdU1_PMA
ENSG00000176595	KBTBD11	protein_coding	5532.54	-3.5024	0.171087	-20.4715	3.86464e-93	3.18162e-91	Down Regulated in MdU1_PMA
ENSG00000138587	MNS1	protein_coding	59.778	-3.49424	0.407902	-8.56636	1.06803e-17	8.9348e-17	Down Regulated in MdU1_PMA
ENSG00000286098	ENSG00000286098	protein_coding	15.6084	-3.49423	1.29	-2.7087	0.00675478	0.0162042	Down Regulated in MdU1_PMA
ENSG00000134594	RAB33A	protein_coding	586.472	-3.49342	0.203287	-17.1846	3.46081e-66	1.46756e-64	Down Regulated in MdU1_PMA
ENSG00000175063	UBE2C	protein_coding	451.394	-3.49006	0.226777	-15.3899	1.91461e-53	5.78678e-52	Down Regulated in MdU1_PMA
ENSG00000170801	HTRA3	protein_coding	18.0268	-3.48988	0.442144	-7.89308	2.94812e-15	2.15721e-14	Down Regulated in MdU1_PMA
ENSG00000118193	KIF14	protein_coding	1176.52	-3.48869	0.205325	-16.9911	9.56261e-65	3.91172e-63	Down Regulated in MdU1_PMA
ENSG00000128050	PAICS	protein_coding	3904.6	-3.47952	0.137614	-25.2847	4.70887e-141	1.17281e-138	Down Regulated in MdU1_PMA
ENSG00000154920	EME1	protein_coding	662.892	-3.47914	0.192093	-18.1118	2.57223e-73	1.36418e-71	Down Regulated in MdU1_PMA
ENSG00000134871	COL4A2	protein_coding	723.281	-3.47762	0.174998	-19.8723	7.06388e-88	5.34573e-86	Down Regulated in MdU1_PMA
ENSG00000101444	AHCY	protein_coding	3054.83	-3.47751	0.239696	-14.508	1.07754e-47	2.74634e-46	Down Regulated in MdU1_PMA
ENSG00000171877	FRMD5	protein_coding	7.19037	-3.47387	1.04236	-3.33271	0.000860041	0.00237805	Down Regulated in MdU1_PMA
ENSG00000147465	STAR	protein_coding	459.637	-3.47325	0.150704	-23.0468	1.583e-117	2.10454e-115	Down Regulated in MdU1_PMA
ENSG00000073111	MCM2	protein_coding	3452.57	-3.47325	0.125237	-27.7334	2.76232e-169	1.15641e-166	Down Regulated in MdU1_PMA
ENSG00000196209	SIRPB2	protein_coding	120.192	-3.47249	0.2496	-13.9123	5.33735e-44	1.22541e-42	Down Regulated in MdU1_PMA
ENSG00000144460	NYAP2	protein_coding	1.32521	-3.46913	2.86794	-1.20962	0.226423	0.377519	Non Significant
ENSG00000100526	CDKN3	protein_coding	619.963	-3.4685	0.230146	-15.0709	2.51848e-51	7.0791e-50	Down Regulated in MdU1_PMA
ENSG00000288000	ENSG00000288000	protein_coding	0.874232	-3.46831	4.23732	-0.818514	0.413064	0.621129	Non Significant
ENSG00000106804	C5	protein_coding	598.047	-3.45956	0.184089	-18.7928	8.64514e-79	5.34911e-77	Down Regulated in MdU1_PMA
ENSG00000171916	LGALS9C	protein_coding	13.6722	-3.45304	0.632107	-5.46275	4.68812e-08	2.05077e-07	Down Regulated in MdU1_PMA
ENSG00000135622	SEMA4F	protein_coding	4.01904	-3.45181	1.24478	-2.77303	0.00555365	0.0135006	Down Regulated in MdU1_PMA
ENSG00000112769	LAMA4	protein_coding	4.07216	-3.45003	1.25359	-2.75212	0.0059211	0.0143248	Down Regulated in MdU1_PMA
ENSG00000286522	H3C2	protein_coding	1.62779	-3.44857	1.29459	-2.66384	0.00772544	0.0183582	Down Regulated in MdU1_PMA
ENSG00000215784	FAM72D	protein_coding	311.016	-3.44326	0.197189	-17.4617	2.80338e-68	1.26222e-66	Down Regulated in MdU1_PMA
ENSG00000134121	CHL1	protein_coding	2.35514	-3.44305	4.23608	-0.812791	0.416338	0.624951	Non Significant
ENSG00000215704	CELA2B	protein_coding	0.592227	-3.44015	4.24664	-0.810088	0.417889	0.62685	Non Significant
ENSG00000147799	ARHGAP39	protein_coding	2.22749	-3.43949	1.23712	-2.78024	0.00543182	0.0132175	Down Regulated in MdU1_PMA
ENSG00000205309	NT5M	protein_coding	221.087	-3.43795	0.275845	-12.4634	1.18265e-35	2.0466e-34	Down Regulated in MdU1_PMA
ENSG00000105642	KCNN1	protein_coding	11.3292	-3.4369	0.913517	-3.76227	0.000168376	0.000511893	Down Regulated in MdU1_PMA
ENSG00000165125	TRPV6	protein_coding	4.3704	-3.43643	0.903271	-3.80443	0.000142133	0.00043561	Down Regulated in MdU1_PMA
ENSG00000142731	PLK4	protein_coding	776.056	-3.43397	0.233019	-14.7369	3.73715e-49	9.8701e-48	Down Regulated in MdU1_PMA
ENSG00000160298	C21orf58	protein_coding	464.725	-3.43011	0.237398	-14.4488	2.55234e-47	6.4467e-46	Down Regulated in MdU1_PMA
ENSG00000171320	ESCO2	protein_coding	424.593	-3.42899	0.240655	-14.2486	4.57603e-46	1.11295e-44	Down Regulated in MdU1_PMA
ENSG00000165868	HSPA12A	protein_coding	4.04399	-3.42867	1.27735	-2.68421	0.00727013	0.0173538	Down Regulated in MdU1_PMA
ENSG00000152669	CCNO	protein_coding	20.4025	-3.42776	0.549904	-6.23337	4.56509e-10	2.35138e-09	Down Regulated in MdU1_PMA
ENSG00000127586	CHTF18	protein_coding	691.532	-3.42485	0.23818	-14.3792	6.98538e-47	1.74643e-45	Down Regulated in MdU1_PMA
ENSG00000134827	TCN1	protein_coding	46.4318	-3.42428	1.01896	-3.36056	0.000777848	0.002166	Down Regulated in MdU1_PMA
ENSG00000148408	CACNA1B	protein_coding	9.92429	-3.42193	1.2754	-2.68302	0.00729613	0.0174116	Down Regulated in MdU1_PMA
ENSG00000176194	CIDEA	protein_coding	0.513273	-3.42002	4.23535	-0.807493	0.419382	0.628562	Non Significant
ENSG00000173464	RNASE11	protein_coding	10.7112	-3.41875	0.597807	-5.71881	1.07275e-08	4.97816e-08	Down Regulated in MdU1_PMA
ENSG00000183873	SCN5A	protein_coding	13.0121	-3.41533	0.826161	-4.13398	3.56538e-05	0.000118002	Down Regulated in MdU1_PMA
ENSG00000120738	EGR1	protein_coding	672.018	-3.41531	0.354392	-9.63709	5.57484e-22	5.80988e-21	Down Regulated in MdU1_PMA
ENSG00000116830	TTF2	protein_coding	1409.87	-3.41297	0.197379	-17.2915	5.45495e-67	2.35893e-65	Down Regulated in MdU1_PMA
ENSG00000104728	ARHGEF10	protein_coding	1094.85	-3.41226	0.164415	-20.754	1.12914e-95	9.57627e-94	Down Regulated in MdU1_PMA
ENSG00000066735	KIF26A	protein_coding	2.27842	-3.41208	2.85501	-1.19512	0.232039	0.385728	Non Significant
ENSG00000174776	WDR49	protein_coding	17.5697	-3.41097	0.895089	-3.81076	0.000138538	0.000425585	Down Regulated in MdU1_PMA
ENSG00000024526	DEPDC1	protein_coding	343.705	-3.40994	0.224441	-15.193	3.93417e-52	1.14004e-50	Down Regulated in MdU1_PMA
ENSG00000179855	GIPC3	protein_coding	2.3593	-3.40677	1.70164	-2.00205	0.0452797	0.0920755	Non Significant
ENSG00000129991	TNNI3	protein_coding	4.65313	-3.40652	0.977147	-3.48619	0.000489952	0.00140529	Down Regulated in MdU1_PMA
ENSG00000256566	ENSG00000256566	protein_coding	5.46624	-3.40503	1.03824	-3.27961	0.00103952	0.00283565	Down Regulated in MdU1_PMA
ENSG00000164114	MAP9	protein_coding	1.52176	-3.4036	3.75158	-0.907246	0.364277	0.561851	Non Significant
ENSG00000128596	CCDC136	protein_coding	575.734	-3.40013	0.189635	-17.9299	6.89531e-72	3.51482e-70	Down Regulated in MdU1_PMA
ENSG00000060656	PTPRU	protein_coding	16.636	-3.39927	0.664254	-5.11742	3.09742e-07	1.26573e-06	Down Regulated in MdU1_PMA
ENSG00000166573	GALR1	protein_coding	5.03873	-3.39764	1.85143	-1.83514	0.0664848	0.130165	Non Significant
ENSG00000277196	PRODH	protein_coding	1.34721	-3.39711	1.50101	-2.26322	0.0236221	0.0511206	Non Significant
ENSG00000276368	H2AC14	protein_coding	0.932396	-3.39686	2.43314	-1.39608	0.162689	0.285479	Non Significant
ENSG00000139364	TMEM132B	protein_coding	91.8084	-3.39676	0.257261	-13.2035	8.36991e-40	1.66856e-38	Down Regulated in MdU1_PMA
ENSG00000148204	CRB2	protein_coding	5.95954	-3.38917	1.01564	-3.33699	0.000846909	0.00234371	Down Regulated in MdU1_PMA
ENSG00000066629	EML1	protein_coding	15.1979	-3.38878	0.859858	-3.9411	8.111e-05	0.000256785	Down Regulated in MdU1_PMA
ENSG00000110076	NRXN2	protein_coding	52.9908	-3.38472	0.474874	-7.12761	1.02129e-12	6.38337e-12	Down Regulated in MdU1_PMA
ENSG00000215612	HMX1	protein_coding	1.83849	-3.38319	1.31701	-2.56884	0.0102039	0.0237794	Down Regulated in MdU1_PMA
ENSG00000101327	PDYN	protein_coding	1.24473	-3.38032	1.47287	-2.29505	0.02173	0.0474065	Down Regulated in MdU1_PMA
ENSG00000119862	LGALSL	protein_coding	28.5205	-3.37618	1.06629	-3.16627	0.00154406	0.00409446	Down Regulated in MdU1_PMA
ENSG00000177984	LCN15	protein_coding	1.72883	-3.36722	3.52734	-0.954607	0.339777	0.53017	Non Significant
ENSG00000250709	CCDC169-SOHLH2	protein_coding	12.5287	-3.36466	1.00833	-3.33686	0.000847294	0.00234445	Down Regulated in MdU1_PMA
ENSG00000179750	APOBEC3B	protein_coding	1328.27	-3.36276	0.21232	-15.8382	1.69667e-56	5.65e-55	Down Regulated in MdU1_PMA
ENSG00000013573	DDX11	protein_coding	892.75	-3.35645	0.193812	-17.3181	3.43704e-67	1.49618e-65	Down Regulated in MdU1_PMA
ENSG00000170891	CYTL1	protein_coding	35.5918	-3.3544	0.436349	-7.68742	1.50127e-14	1.05723e-13	Down Regulated in MdU1_PMA
ENSG00000185697	MYBL1	protein_coding	279.322	-3.3505	0.248739	-13.47	2.34978e-41	4.9343e-40	Down Regulated in MdU1_PMA
ENSG00000176208	ATAD5	protein_coding	972.802	-3.34859	0.187941	-17.8172	5.19397e-71	2.61372e-69	Down Regulated in MdU1_PMA
ENSG00000134138	MEIS2	protein_coding	85.6982	-3.34786	1.0288	-3.25415	0.00113732	0.00308067	Down Regulated in MdU1_PMA
ENSG00000164045	CDC25A	protein_coding	885.553	-3.34347	0.142583	-23.4494	1.34079e-121	2.04507e-119	Down Regulated in MdU1_PMA
ENSG00000148143	ZNF462	protein_coding	26.1971	-3.34086	0.922524	-3.62143	0.000292977	0.000866079	Down Regulated in MdU1_PMA
ENSG00000169169	CPT1C	protein_coding	3.19228	-3.34049	1.21171	-2.75684	0.00583624	0.0141317	Down Regulated in MdU1_PMA
ENSG00000205978	NYNRIN	protein_coding	13.6158	-3.3392	2.31857	-1.4402	0.149812	0.265965	Non Significant
ENSG00000203546	ENSG00000203546	protein_coding	8.41749	-3.33881	0.877336	-3.80562	0.000141449	0.000433716	Down Regulated in MdU1_PMA
ENSG00000134438	RAX	protein_coding	1.77918	-3.33784	2.95614	-1.12912	0.258847	0.422938	Non Significant
ENSG00000256797	KLRF2	protein_coding	1.18126	-3.32829	1.68251	-1.97816	0.0479103	0.096924	Non Significant
ENSG00000286137	SPDYE14	protein_coding	0.90477	-3.32733	4.25114	-0.782691	0.433808	0.644732	Non Significant
ENSG00000177212	OR2T33	protein_coding	4.76114	-3.32701	1.07238	-3.10245	0.00191929	0.00502313	Down Regulated in MdU1_PMA
ENSG00000176510	OR10AC1	protein_coding	3.18558	-3.32687	1.12958	-2.94524	0.00322709	0.00813117	Down Regulated in MdU1_PMA
ENSG00000100346	CACNA1I	protein_coding	7.71137	-3.32563	1.15367	-2.88264	0.00394354	0.00981446	Down Regulated in MdU1_PMA
ENSG00000102038	SMARCA1	protein_coding	2.03745	-3.32491	2.94113	-1.13049	0.25827	0.422176	Non Significant
ENSG00000167094	TTC16	protein_coding	7.94045	-3.32481	1.08821	-3.05531	0.00224826	0.00582447	Down Regulated in MdU1_PMA
ENSG00000102854	MSLN	protein_coding	1.64704	-3.32351	1.47285	-2.25651	0.0240385	0.0519532	Non Significant
ENSG00000214967	NPIPA7	protein_coding	70.8518	-3.3225	0.687675	-4.83149	1.35514e-06	5.18144e-06	Down Regulated in MdU1_PMA
ENSG00000123485	HJURP	protein_coding	691.744	-3.32189	0.186597	-17.8025	6.75464e-71	3.37321e-69	Down Regulated in MdU1_PMA
ENSG00000196305	IARS1	protein_coding	5332.59	-3.31767	0.124751	-26.5944	7.88347e-156	2.50186e-153	Down Regulated in MdU1_PMA
ENSG00000172731	LRRC20	protein_coding	282.617	-3.31698	0.211665	-15.6709	2.39223e-55	7.729e-54	Down Regulated in MdU1_PMA
ENSG00000106327	TFR2	protein_coding	129.426	-3.30639	0.241169	-13.7099	8.86078e-43	1.97446e-41	Down Regulated in MdU1_PMA
ENSG00000004776	HSPB6	protein_coding	10.1515	-3.30613	0.799871	-4.13333	3.57547e-05	0.000118316	Down Regulated in MdU1_PMA
ENSG00000141753	IGFBP4	protein_coding	296.79	-3.30367	0.234567	-14.0841	4.75749e-45	1.11439e-43	Down Regulated in MdU1_PMA
ENSG00000123836	PFKFB2	protein_coding	5.70717	-3.29997	1.82518	-1.80802	0.0706033	0.137304	Non Significant
ENSG00000187398	LUZP2	protein_coding	1.90589	-3.29811	2.91546	-1.13125	0.257949	0.421791	Non Significant
ENSG00000164100	NDST3	protein_coding	10.0179	-3.29704	0.704203	-4.68194	2.84167e-06	1.05755e-05	Down Regulated in MdU1_PMA
ENSG00000092445	TYRO3	protein_coding	1050.25	-3.29498	0.175874	-18.7349	2.57136e-78	1.55674e-76	Down Regulated in MdU1_PMA
ENSG00000184227	ACOT1	protein_coding	2.19009	-3.29497	1.16477	-2.82886	0.00467139	0.0114749	Down Regulated in MdU1_PMA
ENSG00000111664	GNB3	protein_coding	5.77913	-3.29266	0.84265	-3.90751	9.32539e-05	0.000292409	Down Regulated in MdU1_PMA
ENSG00000158816	VWA5B1	protein_coding	2.64945	-3.29086	1.40565	-2.34116	0.0192238	0.0424367	Down Regulated in MdU1_PMA
ENSG00000110042	DTX4	protein_coding	100.366	-3.28834	0.399528	-8.23057	1.86325e-16	1.46704e-15	Down Regulated in MdU1_PMA
ENSG00000178038	ALS2CL	protein_coding	1.641	-3.28747	3.05108	-1.07748	0.281266	0.45303	Non Significant
ENSG00000140563	MCTP2	protein_coding	719.604	-3.28654	0.206585	-15.9089	5.49589e-57	1.85166e-55	Down Regulated in MdU1_PMA
ENSG00000070669	ASNS	protein_coding	2063.09	-3.28329	0.193481	-16.9696	1.37833e-64	5.61491e-63	Down Regulated in MdU1_PMA
ENSG00000186767	SPIN4	protein_coding	738.212	-3.28232	0.282076	-11.6363	2.69421e-31	4.04975e-30	Down Regulated in MdU1_PMA
ENSG00000073146	MOV10L1	protein_coding	1.64568	-3.28116	2.04966	-1.60083	0.109414	0.202088	Non Significant
ENSG00000163661	PTX3	protein_coding	35.2381	-3.27859	0.315518	-10.3911	2.72117e-25	3.25878e-24	Down Regulated in MdU1_PMA
ENSG00000166503	HDGFL3	protein_coding	563.779	-3.27841	0.738391	-4.43994	8.99857e-06	3.18905e-05	Down Regulated in MdU1_PMA
ENSG00000132437	DDC	protein_coding	3.11365	-3.27807	1.5468	-2.11925	0.0340692	0.0714577	Non Significant
ENSG00000183579	ZNRF3	protein_coding	192.624	-3.2762	0.189933	-17.2493	1.13277e-66	4.85585e-65	Down Regulated in MdU1_PMA
ENSG00000140525	FANCI	protein_coding	3316.93	-3.2762	0.153959	-21.2798	1.74863e-100	1.66213e-98	Down Regulated in MdU1_PMA
ENSG00000170561	IRX2	protein_coding	1.63012	-3.27595	3.1727	-1.03254	0.301817	0.48066	Non Significant
ENSG00000137807	KIF23	protein_coding	1227.6	-3.27474	0.19482	-16.8091	2.09302e-63	8.26951e-62	Down Regulated in MdU1_PMA
ENSG00000005187	ACSM3	protein_coding	214.395	-3.27235	0.218822	-14.9544	1.45847e-50	4.01354e-49	Down Regulated in MdU1_PMA
ENSG00000172915	NBEA	protein_coding	61.588	-3.27112	0.812436	-4.02632	5.66576e-05	0.000182723	Down Regulated in MdU1_PMA
ENSG00000152953	STK32B	protein_coding	2.16922	-3.26956	1.75246	-1.8657	0.062083	0.122473	Non Significant
ENSG00000163827	LRRC2	protein_coding	17.8643	-3.26556	0.535	-6.10385	1.03544e-09	5.16958e-09	Down Regulated in MdU1_PMA
ENSG00000156970	BUB1B	protein_coding	2103.9	-3.26503	0.147829	-22.0865	4.25996e-108	4.76244e-106	Down Regulated in MdU1_PMA
ENSG00000071794	HLTF	protein_coding	2480.35	-3.26355	0.142315	-22.9318	2.23634e-116	2.87596e-114	Down Regulated in MdU1_PMA
ENSG00000106526	ACTR3C	protein_coding	1.59921	-3.25898	2.44863	-1.33094	0.183209	0.316074	Non Significant
ENSG00000168398	BDKRB2	protein_coding	0.837141	-3.2559	3.65752	-0.890192	0.373363	0.572988	Non Significant
ENSG00000270379	HEATR9	protein_coding	6.3483	-3.25569	0.814224	-3.99852	6.37396e-05	0.000204392	Down Regulated in MdU1_PMA
ENSG00000165246	NLGN4Y	protein_coding	4.19265	-3.25099	4.24799	-0.765301	0.444092	0.656959	Non Significant
ENSG00000155269	GPR78	protein_coding	2.32629	-3.24582	1.35399	-2.39721	0.0165202	0.0369629	Down Regulated in MdU1_PMA
ENSG00000128310	GALR3	protein_coding	2.75142	-3.24579	1.36305	-2.38127	0.0172531	0.0383975	Down Regulated in MdU1_PMA
ENSG00000130377	ACSBG2	protein_coding	7.24933	-3.24496	1.00527	-3.22796	0.00124678	0.00335131	Down Regulated in MdU1_PMA
ENSG00000088881	EBF4	protein_coding	50.1503	-3.24378	0.333792	-9.71796	2.52784e-22	2.67264e-21	Down Regulated in MdU1_PMA
ENSG00000188037	CLCN1	protein_coding	5.53702	-3.23907	0.727436	-4.45272	8.479e-06	3.01305e-05	Down Regulated in MdU1_PMA
ENSG00000112759	SLC29A1	protein_coding	993.342	-3.23108	0.169194	-19.0969	2.67944e-81	1.76915e-79	Down Regulated in MdU1_PMA
ENSG00000176055	MBLAC2	protein_coding	548.801	-3.23067	0.189141	-17.0807	2.0651e-65	8.59045e-64	Down Regulated in MdU1_PMA
ENSG00000178425	NT5DC1	protein_coding	877.785	-3.2304	0.18103	-17.8445	3.18692e-71	1.61613e-69	Down Regulated in MdU1_PMA
ENSG00000101076	HNF4A	protein_coding	1.08277	-3.23026	1.65354	-1.95354	0.0507554	0.102259	Non Significant
ENSG00000066032	CTNNA2	protein_coding	4.53144	-3.23014	1.10798	-2.91534	0.00355298	0.0088942	Down Regulated in MdU1_PMA
ENSG00000134755	DSC2	protein_coding	1.08767	-3.22848	3.16542	-1.01992	0.307766	0.488828	Non Significant
ENSG00000152128	TMEM163	protein_coding	284.301	-3.22751	0.199772	-16.1559	1.03129e-58	3.61704e-57	Down Regulated in MdU1_PMA
ENSG00000177599	ZNF491	protein_coding	0.667554	-3.22696	3.9449	-0.818009	0.413352	0.621418	Non Significant
ENSG00000119326	CTNNAL1	protein_coding	1025.43	-3.22642	0.147603	-21.8587	6.42934e-106	6.98916e-104	Down Regulated in MdU1_PMA
ENSG00000187720	THSD4	protein_coding	40.2078	-3.22623	0.941777	-3.42568	0.000613259	0.00173419	Down Regulated in MdU1_PMA
ENSG00000197857	ZNF44	protein_coding	34.9768	-3.22306	1.0359	-3.11136	0.00186228	0.00488433	Down Regulated in MdU1_PMA
ENSG00000115758	ODC1	protein_coding	2036.04	-3.22209	0.236835	-13.6048	3.75132e-42	8.20122e-41	Down Regulated in MdU1_PMA
ENSG00000117650	NEK2	protein_coding	574.317	-3.22063	0.223855	-14.3871	6.23127e-47	1.56187e-45	Down Regulated in MdU1_PMA
ENSG00000198948	MFAP3L	protein_coding	35.011	-3.21893	0.506531	-6.35486	2.08619e-10	1.10522e-09	Down Regulated in MdU1_PMA
ENSG00000166965	RCCD1	protein_coding	684.037	-3.21608	0.129581	-24.819	5.59083e-136	1.13407e-133	Down Regulated in MdU1_PMA
ENSG00000134569	LRP4	protein_coding	18.4885	-3.21592	0.625447	-5.1418	2.72116e-07	1.11755e-06	Down Regulated in MdU1_PMA
ENSG00000068489	PRR11	protein_coding	3652.87	-3.21488	0.174757	-18.3962	1.40806e-75	8.03044e-74	Down Regulated in MdU1_PMA
ENSG00000071539	TRIP13	protein_coding	877.596	-3.21459	0.182159	-17.6472	1.06936e-69	5.04575e-68	Down Regulated in MdU1_PMA
ENSG00000133256	PDE6B	protein_coding	1.26713	-3.21213	2.46846	-1.30127	0.193167	0.330529	Non Significant
ENSG00000235608	NKX1-1	protein_coding	1.06795	-3.21206	4.03051	-0.796937	0.425487	0.635438	Non Significant
ENSG00000146410	MTFR2	protein_coding	604.413	-3.21023	0.177831	-18.0521	7.59184e-73	4.01551e-71	Down Regulated in MdU1_PMA
ENSG00000065150	IPO5	protein_coding	7277.99	-3.20961	0.0981364	-32.7056	1.30099e-234	1.50578e-231	Down Regulated in MdU1_PMA
ENSG00000135374	ELF5	protein_coding	0.890342	-3.20856	3.09296	-1.03738	0.29956	0.477645	Non Significant
ENSG00000092470	WDR76	protein_coding	905.917	-3.2071	0.16491	-19.4476	3.05433e-84	2.14632e-82	Down Regulated in MdU1_PMA
ENSG00000128917	DLL4	protein_coding	6.40679	-3.20473	0.988176	-3.24307	0.00118248	0.00319375	Down Regulated in MdU1_PMA
ENSG00000198010	DLGAP2	protein_coding	9.94115	-3.20439	1.04918	-3.0542	0.00225665	0.00584465	Down Regulated in MdU1_PMA
ENSG00000166123	GPT2	protein_coding	1333.71	-3.20256	0.185911	-17.2263	1.6858e-66	7.19518e-65	Down Regulated in MdU1_PMA
ENSG00000184221	OLIG1	protein_coding	262.99	-3.19996	0.316886	-10.0981	5.62992e-24	6.3481e-23	Down Regulated in MdU1_PMA
ENSG00000164626	KCNK5	protein_coding	692.265	-3.1999	0.27016	-11.8445	2.29874e-32	3.56142e-31	Down Regulated in MdU1_PMA
ENSG00000186871	ERCC6L	protein_coding	733.893	-3.19911	0.146717	-21.8046	2.09793e-105	2.21929e-103	Down Regulated in MdU1_PMA
ENSG00000158089	GALNT14	protein_coding	356.512	-3.19878	0.322615	-9.91518	3.57611e-23	3.91126e-22	Down Regulated in MdU1_PMA
ENSG00000172572	PDE3A	protein_coding	4.24793	-3.19801	1.09217	-2.92811	0.00341024	0.00855757	Down Regulated in MdU1_PMA
ENSG00000068024	HDAC4	protein_coding	154.894	-3.19728	0.925308	-3.45537	0.000549531	0.00156613	Down Regulated in MdU1_PMA
ENSG00000187672	ERC2	protein_coding	0.692533	-3.19472	4.24462	-0.752651	0.451659	0.665732	Non Significant
ENSG00000169750	RAC3	protein_coding	166.644	-3.19414	0.260463	-12.2633	1.42608e-34	2.35794e-33	Down Regulated in MdU1_PMA
ENSG00000169385	RNASE2	protein_coding	2011.13	-3.19236	0.367772	-8.68025	3.94889e-18	3.38407e-17	Down Regulated in MdU1_PMA
ENSG00000115163	CENPA	protein_coding	607.054	-3.19132	0.148268	-21.524	9.28947e-103	9.32549e-101	Down Regulated in MdU1_PMA
ENSG00000112029	FBXO5	protein_coding	770.344	-3.19077	0.138805	-22.9875	6.22203e-117	8.10759e-115	Down Regulated in MdU1_PMA
ENSG00000166741	NNMT	protein_coding	0.662384	-3.18859	4.25104	-0.750073	0.453211	0.667668	Non Significant
ENSG00000140451	PIF1	protein_coding	192.549	-3.18815	0.329127	-9.68667	3.43544e-22	3.60895e-21	Down Regulated in MdU1_PMA
ENSG00000066279	ASPM	protein_coding	940.074	-3.18808	0.18671	-17.075	2.27742e-65	9.4338e-64	Down Regulated in MdU1_PMA
ENSG00000205704	SMIM45	protein_coding	9.34673	-3.18803	0.590797	-5.39615	6.80856e-08	2.93462e-07	Down Regulated in MdU1_PMA
ENSG00000137804	NUSAP1	protein_coding	2641.33	-3.18482	0.162548	-19.5931	1.77103e-85	1.26715e-83	Down Regulated in MdU1_PMA
ENSG00000106852	LHX6	protein_coding	14.4605	-3.18319	0.829255	-3.83861	0.000123731	0.000382848	Down Regulated in MdU1_PMA
ENSG00000265817	FSBP	protein_coding	106.168	-3.18117	0.279731	-11.3723	5.74859e-30	8.23811e-29	Down Regulated in MdU1_PMA
ENSG00000126878	AIF1L	protein_coding	3.55686	-3.18018	1.01219	-3.14189	0.00167862	0.00443158	Down Regulated in MdU1_PMA
ENSG00000170476	MZB1	protein_coding	29.3625	-3.17838	0.98755	-3.21845	0.00128886	0.00345453	Down Regulated in MdU1_PMA
ENSG00000169031	COL4A3	protein_coding	2.35455	-3.17535	1.63988	-1.93633	0.052827	0.106031	Non Significant
ENSG00000146242	TPBG	protein_coding	197.818	-3.16969	0.986794	-3.21211	0.00131764	0.00352733	Down Regulated in MdU1_PMA
ENSG00000080986	NDC80	protein_coding	835.818	-3.16942	0.214862	-14.751	3.03334e-49	8.05452e-48	Down Regulated in MdU1_PMA
ENSG00000140798	ABCC12	protein_coding	0.668429	-3.16798	4.2477	-0.745812	0.455781	0.67015	Non Significant
ENSG00000173826	KCNH6	protein_coding	1.37463	-3.16683	2.84529	-1.11301	0.265705	0.432245	Non Significant
ENSG00000138160	KIF11	protein_coding	1481.12	-3.16416	0.172046	-18.3913	1.5414e-75	8.7655e-74	Down Regulated in MdU1_PMA
ENSG00000168298	H1-4	protein_coding	4.60409	-3.16403	1.02384	-3.09034	0.00199925	0.00521962	Down Regulated in MdU1_PMA
ENSG00000076003	MCM6	protein_coding	4313.27	-3.16315	0.121609	-26.0109	3.73074e-149	1.0795e-146	Down Regulated in MdU1_PMA
ENSG00000145794	MEGF10	protein_coding	21.5004	-3.15825	0.896115	-3.52438	0.000424482	0.00123006	Down Regulated in MdU1_PMA
ENSG00000196460	RFX8	protein_coding	241.116	-3.15378	0.294785	-10.6985	1.0339e-26	1.31245e-25	Down Regulated in MdU1_PMA
ENSG00000075218	GTSE1	protein_coding	824.307	-3.15082	0.14463	-21.7854	3.193e-105	3.35965e-103	Down Regulated in MdU1_PMA
ENSG00000146205	ANO7	protein_coding	7.68065	-3.14983	0.972258	-3.2397	0.00119655	0.00322855	Down Regulated in MdU1_PMA
ENSG00000164659	ELAPOR2	protein_coding	8.46341	-3.14981	1.02428	-3.07516	0.0021039	0.0054728	Down Regulated in MdU1_PMA
ENSG00000198354	DCAF12L2	protein_coding	1.24264	-3.14809	2.5026	-1.25793	0.208417	0.352879	Non Significant
ENSG00000117724	CENPF	protein_coding	3659.95	-3.14703	0.186635	-16.862	8.56932e-64	3.42008e-62	Down Regulated in MdU1_PMA
ENSG00000198056	PRIM1	protein_coding	925.184	-3.14687	0.139237	-22.6008	4.26073e-113	5.17495e-111	Down Regulated in MdU1_PMA
ENSG00000133124	IRS4	protein_coding	2.71649	-3.14582	4.27237	-0.736317	0.461538	0.676542	Non Significant
ENSG00000161267	BDH1	protein_coding	656.56	-3.14524	0.232122	-13.5499	7.92874e-42	1.71059e-40	Down Regulated in MdU1_PMA
ENSG00000169255	B3GALNT1	protein_coding	1.63741	-3.14491	3.63086	-0.866161	0.386402	0.588911	Non Significant
ENSG00000100253	MIOX	protein_coding	1.71845	-3.14486	1.80708	-1.7403	0.081806	0.156471	Non Significant
ENSG00000164104	HMGB2	protein_coding	6834.04	-3.14363	0.173362	-18.1333	1.73911e-73	9.29858e-72	Down Regulated in MdU1_PMA
ENSG00000123243	ITIH5	protein_coding	1.28714	-3.14215	2.52159	-1.2461	0.212729	0.359006	Non Significant
ENSG00000102743	SLC25A15	protein_coding	210.384	-3.14047	0.304769	-10.3044	6.72863e-25	7.92295e-24	Down Regulated in MdU1_PMA
ENSG00000089685	BIRC5	protein_coding	865.101	-3.13911	0.193106	-16.2559	2.03002e-59	7.27553e-58	Down Regulated in MdU1_PMA
ENSG00000153885	KCTD15	protein_coding	379.705	-3.13858	0.218041	-14.3945	5.60574e-47	1.40687e-45	Down Regulated in MdU1_PMA
ENSG00000187105	HEATR4	protein_coding	3.86622	-3.13493	1.36087	-2.30363	0.0212436	0.0464432	Down Regulated in MdU1_PMA
ENSG00000097021	ACOT7	protein_coding	1069.75	-3.13114	0.22729	-13.776	3.55638e-43	7.97894e-42	Down Regulated in MdU1_PMA
ENSG00000137825	ITPKA	protein_coding	179.977	-3.12423	0.245861	-12.7073	5.38489e-37	9.79233e-36	Down Regulated in MdU1_PMA
ENSG00000160200	CBS	protein_coding	3.29348	-3.12324	1.48911	-2.09739	0.0359593	0.0749428	Non Significant
ENSG00000091138	SLC26A3	protein_coding	0.913159	-3.1209	3.23026	-0.966145	0.333972	0.522979	Non Significant
ENSG00000165449	SLC16A9	protein_coding	381.785	-3.12073	0.182929	-17.0598	2.95553e-65	1.21914e-63	Down Regulated in MdU1_PMA
ENSG00000076344	RGS11	protein_coding	1.614	-3.11847	2.11946	-1.47135	0.141197	0.252357	Non Significant
ENSG00000060982	BCAT1	protein_coding	1574.88	-3.1183	0.237511	-13.129	2.2451e-39	4.39987e-38	Down Regulated in MdU1_PMA
ENSG00000094804	CDC6	protein_coding	741.741	-3.11766	0.133958	-23.2735	8.23013e-120	1.17345e-117	Down Regulated in MdU1_PMA
ENSG00000187922	LCN10	protein_coding	1.81713	-3.11756	2.96983	-1.04975	0.293835	0.469915	Non Significant
ENSG00000173207	CKS1B	protein_coding	1907.56	-3.11637	0.164083	-18.9926	1.96339e-80	1.26248e-78	Down Regulated in MdU1_PMA
ENSG00000163817	SLC6A20	protein_coding	9.72052	-3.11505	0.910151	-3.42256	0.000620343	0.00175221	Down Regulated in MdU1_PMA
ENSG00000101447	FAM83D	protein_coding	207.655	-3.11254	0.176231	-17.6617	8.26909e-70	3.92054e-68	Down Regulated in MdU1_PMA
ENSG00000251692	PTX4	protein_coding	0.783192	-3.11201	2.45829	-1.26593	0.205539	0.348667	Non Significant
ENSG00000172159	FRMD3	protein_coding	210.064	-3.11163	0.267197	-11.6454	2.42054e-31	3.64675e-30	Down Regulated in MdU1_PMA
ENSG00000153303	FRMD1	protein_coding	2.33406	-3.10753	4.27263	-0.727312	0.467035	0.682921	Non Significant
ENSG00000179348	GATA2	protein_coding	17.6095	-3.10591	0.545482	-5.69387	1.24189e-08	5.72393e-08	Down Regulated in MdU1_PMA
ENSG00000124191	TOX2	protein_coding	2.06602	-3.10256	1.56288	-1.98515	0.0471275	0.0954876	Non Significant
ENSG00000198842	STYXL2	protein_coding	79.0233	-3.1024	1.03069	-3.01003	0.00261222	0.00668549	Down Regulated in MdU1_PMA
ENSG00000146966	DENND2A	protein_coding	4.42608	-3.1024	1.55138	-1.99976	0.0455259	0.0925381	Non Significant
ENSG00000088002	SULT2B1	protein_coding	8.40869	-3.10226	0.73082	-4.2449	2.18688e-05	7.42137e-05	Down Regulated in MdU1_PMA
ENSG00000163357	DCST1	protein_coding	1.69427	-3.10157	1.73128	-1.79148	0.0732156	0.141554	Non Significant
ENSG00000056487	PHF21B	protein_coding	10.4058	-3.10034	1.17801	-2.63183	0.00849262	0.0200529	Down Regulated in MdU1_PMA
ENSG00000144554	FANCD2	protein_coding	1974.67	-3.10025	0.158273	-19.588	1.95607e-85	1.39448e-83	Down Regulated in MdU1_PMA
ENSG00000106070	GRB10	protein_coding	2476.8	-3.10002	0.110831	-27.9706	3.70172e-172	1.65534e-169	Down Regulated in MdU1_PMA
ENSG00000128567	PODXL	protein_coding	471.237	-3.09949	0.166214	-18.6476	1.31981e-77	7.86926e-76	Down Regulated in MdU1_PMA
ENSG00000181264	TLCD5	protein_coding	0.809867	-3.09824	2.32423	-1.33302	0.182526	0.315106	Non Significant
ENSG00000164465	DCBLD1	protein_coding	426.238	-3.09445	0.328467	-9.42089	4.47262e-21	4.44911e-20	Down Regulated in MdU1_PMA
ENSG00000111261	MANSC1	protein_coding	6.43945	-3.09399	1.36401	-2.26831	0.0233103	0.0505293	Non Significant
ENSG00000109805	NCAPG	protein_coding	1578.67	-3.09374	0.160637	-19.2592	1.1822e-82	7.9661e-81	Down Regulated in MdU1_PMA
ENSG00000170312	CDK1	protein_coding	2148.03	-3.09365	0.178548	-17.3268	2.95552e-67	1.29805e-65	Down Regulated in MdU1_PMA
ENSG00000141622	RNF165	protein_coding	470.499	-3.09318	0.29478	-10.4932	9.28342e-26	1.13103e-24	Down Regulated in MdU1_PMA
ENSG00000184220	CMSS1	protein_coding	580.089	-3.09023	0.186993	-16.5259	2.38702e-61	8.89528e-60	Down Regulated in MdU1_PMA
ENSG00000132321	IQCA1	protein_coding	1.48507	-3.08729	2.80889	-1.09911	0.271718	0.440245	Non Significant
ENSG00000198756	COLGALT2	protein_coding	87.0074	-3.08043	0.221751	-13.8914	7.14448e-44	1.63649e-42	Down Regulated in MdU1_PMA
ENSG00000154025	SLC5A10	protein_coding	22.8806	-3.07853	0.623422	-4.93811	7.8882e-07	3.09303e-06	Down Regulated in MdU1_PMA
ENSG00000197506	SLC28A3	protein_coding	159.882	-3.07689	0.376776	-8.16636	3.17839e-16	2.46698e-15	Down Regulated in MdU1_PMA
ENSG00000142182	DNMT3L	protein_coding	0.487848	-3.07612	4.24744	-0.724229	0.468925	0.685176	Non Significant
ENSG00000205084	TMEM231	protein_coding	72.6323	-3.0752	0.402646	-7.63748	2.21514e-14	1.54229e-13	Down Regulated in MdU1_PMA
ENSG00000145757	SPATA9	protein_coding	2.99959	-3.07469	1.15092	-2.6715	0.0075512	0.017968	Down Regulated in MdU1_PMA
ENSG00000072041	SLC6A15	protein_coding	1.74954	-3.07462	2.68593	-1.14471	0.252329	0.413908	Non Significant
ENSG00000177602	HASPIN	protein_coding	431.397	-3.07087	0.184962	-16.6027	6.66054e-62	2.52997e-60	Down Regulated in MdU1_PMA
ENSG00000106823	ECM2	protein_coding	1.45631	-3.07056	1.50371	-2.04199	0.041153	0.0845932	Non Significant
ENSG00000164611	PTTG1	protein_coding	1329.03	-3.06972	0.239853	-12.7984	1.67469e-37	3.1086e-36	Down Regulated in MdU1_PMA
ENSG00000159259	CHAF1B	protein_coding	380.956	-3.06685	0.20454	-14.9939	8.05271e-51	2.23477e-49	Down Regulated in MdU1_PMA
ENSG00000283528	TCAF2C	protein_coding	1.62624	-3.06646	2.44787	-1.25271	0.210312	0.355446	Non Significant
ENSG00000166105	GLB1L3	protein_coding	2.39859	-3.06524	4.26074	-0.719416	0.471884	0.688069	Non Significant
ENSG00000269026	ENSG00000269026	protein_coding	2.51318	-3.0642	1.28236	-2.3895	0.0168712	0.0376326	Down Regulated in MdU1_PMA
ENSG00000172059	KLF11	protein_coding	51.9175	-3.06375	1.02322	-2.99423	0.00275138	0.00701701	Down Regulated in MdU1_PMA
ENSG00000130307	USHBP1	protein_coding	3.76363	-3.06198	1.09924	-2.78554	0.00534382	0.0130162	Down Regulated in MdU1_PMA
ENSG00000131746	TNS4	protein_coding	0.54355	-3.05896	3.05378	-1.0017	0.316491	0.500057	Non Significant
ENSG00000171241	SHCBP1	protein_coding	1302.73	-3.05602	0.205351	-14.882	4.3159e-50	1.17455e-48	Down Regulated in MdU1_PMA
ENSG00000115461	IGFBP5	protein_coding	1.87066	-3.05571	2.54027	-1.20291	0.229012	0.38135	Non Significant
ENSG00000139734	DIAPH3	protein_coding	859.204	-3.05562	0.169814	-17.994	2.17268e-72	1.13094e-70	Down Regulated in MdU1_PMA
ENSG00000108231	LGI1	protein_coding	2.7738	-3.05488	2.05847	-1.48406	0.137794	0.247483	Non Significant
ENSG00000205221	VIT	protein_coding	41.1636	-3.05393	0.443198	-6.89067	5.55315e-12	3.31605e-11	Down Regulated in MdU1_PMA
ENSG00000165633	VSTM4	protein_coding	7.35812	-3.05363	0.812447	-3.75856	0.000170897	0.000518994	Down Regulated in MdU1_PMA
ENSG00000188613	NANOS1	protein_coding	33.3263	-3.04774	0.503092	-6.05801	1.37813e-09	6.81481e-09	Down Regulated in MdU1_PMA
ENSG00000183688	RFLNB	protein_coding	2268.35	-3.04715	0.112094	-27.1839	1.00616e-162	3.73534e-160	Down Regulated in MdU1_PMA
ENSG00000101204	CHRNA4	protein_coding	1.04334	-3.04685	2.56172	-1.18938	0.234291	0.388782	Non Significant
ENSG00000102221	JADE3	protein_coding	491.531	-3.04354	0.166969	-18.2282	3.08262e-74	1.6709e-72	Down Regulated in MdU1_PMA
ENSG00000011426	ANLN	protein_coding	2003.85	-3.04275	0.134943	-22.5485	1.38977e-112	1.66738e-110	Down Regulated in MdU1_PMA
ENSG00000179862	CITED4	protein_coding	613.73	-3.04271	0.215071	-14.1474	1.93656e-45	4.6019e-44	Down Regulated in MdU1_PMA
ENSG00000284906	ENSG00000284906	protein_coding	295.193	-3.04168	0.370859	-8.20171	2.36992e-16	1.85484e-15	Down Regulated in MdU1_PMA
ENSG00000198093	ZNF649	protein_coding	50.0508	-3.03975	0.370118	-8.21291	2.15884e-16	1.693e-15	Down Regulated in MdU1_PMA
ENSG00000188011	RTP5	protein_coding	0.60303	-3.03808	4.05378	-0.749444	0.45359	0.668126	Non Significant
ENSG00000125520	SLC2A4RG	protein_coding	880.419	-3.03556	0.233267	-13.0132	1.02894e-38	1.96748e-37	Down Regulated in MdU1_PMA
ENSG00000106714	CNTNAP3	protein_coding	10.5784	-3.03328	1.19055	-2.5478	0.0108404	0.0251499	Down Regulated in MdU1_PMA
ENSG00000267127	ENSG00000267127	protein_coding	9.75771	-3.03292	0.714816	-4.24293	2.20618e-05	7.4804e-05	Down Regulated in MdU1_PMA
ENSG00000138771	SHROOM3	protein_coding	132.228	-3.03198	1.07808	-2.81238	0.00491761	0.0120377	Down Regulated in MdU1_PMA
ENSG00000165512	ZNF22	protein_coding	1201	-3.03145	0.149735	-20.2454	3.89661e-91	3.11665e-89	Down Regulated in MdU1_PMA
ENSG00000145423	SFRP2	protein_coding	1.15853	-3.02737	2.39126	-1.26602	0.205507	0.348643	Non Significant
ENSG00000178440	TIMM23B-AGAP6	protein_coding	69.189	-3.02702	0.442988	-6.8332	8.30435e-12	4.9127e-11	Down Regulated in MdU1_PMA
ENSG00000128266	GNAZ	protein_coding	27.5191	-3.02674	0.408362	-7.41191	1.24495e-13	8.2445e-13	Down Regulated in MdU1_PMA
ENSG00000204410	MSH5	protein_coding	688.323	-3.02307	0.24643	-12.2675	1.35447e-34	2.24521e-33	Down Regulated in MdU1_PMA
ENSG00000105011	ASF1B	protein_coding	1551.35	-3.02162	0.145481	-20.7698	8.11276e-96	6.94029e-94	Down Regulated in MdU1_PMA
ENSG00000183763	TRAIP	protein_coding	374.969	-3.02103	0.173027	-17.4599	2.89387e-68	1.29999e-66	Down Regulated in MdU1_PMA
ENSG00000100012	SEC14L3	protein_coding	0.917801	-3.01789	1.59108	-1.89675	0.0578606	0.11488	Non Significant
ENSG00000007174	DNAH9	protein_coding	2.29952	-3.01351	1.99906	-1.50746	0.131692	0.237831	Non Significant
ENSG00000168621	GDNF	protein_coding	1.59079	-3.01269	3.07696	-0.979113	0.327524	0.514406	Non Significant
ENSG00000116329	OPRD1	protein_coding	20.7095	-3.01045	0.536091	-5.61556	1.95926e-08	8.86829e-08	Down Regulated in MdU1_PMA
ENSG00000185899	TAS2R60	protein_coding	1.18754	-3.00866	1.65866	-1.81391	0.0696916	0.135794	Non Significant
ENSG00000146670	CDCA5	protein_coding	1560.3	-3.00279	0.187487	-16.016	9.87611e-58	3.36198e-56	Down Regulated in MdU1_PMA
ENSG00000106236	NPTX2	protein_coding	46.5675	-3.00234	0.640306	-4.68891	2.74667e-06	1.02336e-05	Down Regulated in MdU1_PMA
ENSG00000134690	CDCA8	protein_coding	1561.44	-2.9985	0.127165	-23.5797	6.23376e-123	9.65791e-121	Down Regulated in MdU1_PMA
ENSG00000215018	COL28A1	protein_coding	4.21729	-2.99554	0.876931	-3.41593	0.000635636	0.00179308	Down Regulated in MdU1_PMA
ENSG00000121621	KIF18A	protein_coding	602.931	-2.9943	0.181036	-16.5398	1.89523e-61	7.11653e-60	Down Regulated in MdU1_PMA
ENSG00000259040	BLOC1S5-TXNDC5	protein_coding	9.46655	-2.99405	1.67169	-1.79103	0.0732884	0.14168	Non Significant
ENSG00000179477	ALOX12B	protein_coding	1.85968	-2.99357	1.34063	-2.23297	0.0255511	0.0549027	Non Significant
ENSG00000174099	MSRB3	protein_coding	1577.22	-2.99033	0.1349	-22.1669	7.16324e-109	8.14704e-107	Down Regulated in MdU1_PMA
ENSG00000125885	MCM8	protein_coding	1565.51	-2.99031	0.113373	-26.3758	2.59501e-153	7.97802e-151	Down Regulated in MdU1_PMA
ENSG00000237649	KIFC1	protein_coding	1269.05	-2.98972	0.155179	-19.2663	1.03085e-82	6.99417e-81	Down Regulated in MdU1_PMA
ENSG00000101003	GINS1	protein_coding	959.131	-2.9896	0.134117	-22.2909	4.52338e-110	5.23542e-108	Down Regulated in MdU1_PMA
ENSG00000185480	PARPBP	protein_coding	845.433	-2.9847	0.198581	-15.0301	4.66105e-51	1.30271e-49	Down Regulated in MdU1_PMA
ENSG00000136492	BRIP1	protein_coding	807.057	-2.98134	0.197278	-15.1124	1.34161e-51	3.81466e-50	Down Regulated in MdU1_PMA
ENSG00000107187	LHX3	protein_coding	0.85898	-2.98098	2.43901	-1.22221	0.221629	0.370846	Non Significant
ENSG00000148600	CDHR1	protein_coding	1.58091	-2.98095	4.25944	-0.699846	0.484023	0.701248	Non Significant
ENSG00000182759	MAFA	protein_coding	1.23063	-2.98095	3.27417	-0.910445	0.362588	0.559683	Non Significant
ENSG00000143867	OSR1	protein_coding	1.4006	-2.9775	2.78183	-1.07034	0.284466	0.457322	Non Significant
ENSG00000183527	PSMG1	protein_coding	917.231	-2.97726	0.164077	-18.1455	1.39405e-73	7.49433e-72	Down Regulated in MdU1_PMA
ENSG00000006638	TBXA2R	protein_coding	221.398	-2.97645	0.184827	-16.104	2.39207e-58	8.27177e-57	Down Regulated in MdU1_PMA
ENSG00000091704	CPA1	protein_coding	0.932001	-2.9746	4.25597	-0.698925	0.484599	0.701771	Non Significant
ENSG00000124092	CTCFL	protein_coding	0.98912	-2.97286	2.15622	-1.37873	0.167977	0.293501	Non Significant
ENSG00000146755	TRIM50	protein_coding	0.961512	-2.97216	2.67092	-1.11279	0.265801	0.432365	Non Significant
ENSG00000012048	BRCA1	protein_coding	1293.15	-2.97182	0.23273	-12.7694	2.42991e-37	4.48171e-36	Down Regulated in MdU1_PMA
ENSG00000198483	ANKRD35	protein_coding	94.4469	-2.96943	0.287284	-10.3362	4.83185e-25	5.72719e-24	Down Regulated in MdU1_PMA
ENSG00000165646	SLC18A2	protein_coding	52.4437	-2.96802	0.646721	-4.58933	4.4467e-06	1.62808e-05	Down Regulated in MdU1_PMA
ENSG00000133111	RFXAP	protein_coding	293.991	-2.96754	0.168472	-17.6144	1.90881e-69	8.87888e-68	Down Regulated in MdU1_PMA
ENSG00000101384	JAG1	protein_coding	386.583	-2.96426	0.162	-18.2979	8.60288e-75	4.79519e-73	Down Regulated in MdU1_PMA
ENSG00000172458	IL17D	protein_coding	75.7481	-2.96077	0.303714	-9.74854	1.87146e-22	1.9915e-21	Down Regulated in MdU1_PMA
ENSG00000203852	H3C15	protein_coding	4.29068	-2.95746	0.988058	-2.99321	0.00276061	0.00703689	Down Regulated in MdU1_PMA
ENSG00000179954	SSC5D	protein_coding	12.7826	-2.95576	0.785864	-3.76116	0.000169128	0.00051386	Down Regulated in MdU1_PMA
ENSG00000172346	CSDC2	protein_coding	1.09386	-2.95546	1.82283	-1.62136	0.10494	0.194812	Non Significant
ENSG00000104059	ENTREP2	protein_coding	15.2167	-2.95451	1.08217	-2.73018	0.00632995	0.0152483	Down Regulated in MdU1_PMA
ENSG00000101825	MXRA5	protein_coding	1.75154	-2.95346	3.56864	-0.827615	0.407888	0.614613	Non Significant
ENSG00000050730	TNIP3	protein_coding	2.93383	-2.95018	1.2365	-2.38591	0.0170368	0.0379461	Down Regulated in MdU1_PMA
ENSG00000057593	F7	protein_coding	0.696787	-2.94634	4.25432	-0.692551	0.488591	0.706201	Non Significant
ENSG00000101412	E2F1	protein_coding	502.408	-2.94582	0.166553	-17.6871	5.27626e-70	2.5137e-68	Down Regulated in MdU1_PMA
ENSG00000132911	NMUR2	protein_coding	0.53898	-2.9437	4.22173	-0.697274	0.485631	0.703008	Non Significant
ENSG00000272968	RBAK-RBAKDN	protein_coding	17.1764	-2.94271	0.6584	-4.46948	7.84089e-06	2.79691e-05	Down Regulated in MdU1_PMA
ENSG00000160886	LY6K	protein_coding	2.02485	-2.94058	1.95911	-1.50098	0.13336	0.24038	Non Significant
ENSG00000112118	MCM3	protein_coding	4876.07	-2.94013	0.116647	-25.2053	3.50652e-140	8.62428e-138	Down Regulated in MdU1_PMA
ENSG00000129951	PLPPR3	protein_coding	404.34	-2.94007	0.282317	-10.4141	2.13903e-25	2.57259e-24	Down Regulated in MdU1_PMA
ENSG00000086288	NME8	protein_coding	20.7489	-2.93608	0.751531	-3.9068	9.35254e-05	0.000293165	Down Regulated in MdU1_PMA
ENSG00000130711	PRDM12	protein_coding	11.3274	-2.93584	0.531915	-5.51937	3.40214e-08	1.50462e-07	Down Regulated in MdU1_PMA
ENSG00000188312	CENPP	protein_coding	425.189	-2.93542	0.187259	-15.6757	2.21701e-55	7.19834e-54	Down Regulated in MdU1_PMA
ENSG00000146013	GFRA3	protein_coding	4.40418	-2.93467	1.03199	-2.8437	0.00445937	0.010987	Down Regulated in MdU1_PMA
ENSG00000176160	HSF5	protein_coding	2.40474	-2.93442	1.22226	-2.40081	0.0163586	0.0366156	Down Regulated in MdU1_PMA
ENSG00000186732	MPPED1	protein_coding	4.38312	-2.93169	1.27958	-2.29113	0.0219556	0.0478457	Down Regulated in MdU1_PMA
ENSG00000162139	NEU3	protein_coding	1128.28	-2.93113	0.182513	-16.0598	4.88327e-58	1.67684e-56	Down Regulated in MdU1_PMA
ENSG00000166823	MESP1	protein_coding	0.61936	-2.92971	2.15396	-1.36015	0.173783	0.302169	Non Significant
ENSG00000151725	CENPU	protein_coding	1360.4	-2.92912	0.160364	-18.2654	1.55976e-74	8.59657e-73	Down Regulated in MdU1_PMA
ENSG00000183889	NPIPA9	protein_coding	905.948	-2.9281	0.221435	-13.2233	6.44068e-40	1.2905e-38	Down Regulated in MdU1_PMA
ENSG00000179023	KLHDC7A	protein_coding	1.43323	-2.92671	1.72738	-1.69431	0.0902066	0.170451	Non Significant
ENSG00000153060	TEKT5	protein_coding	1.31745	-2.92604	2.23083	-1.31164	0.189642	0.325322	Non Significant
ENSG00000108641	B9D1	protein_coding	51.6588	-2.92458	0.389969	-7.49951	6.40548e-14	4.32513e-13	Down Regulated in MdU1_PMA
ENSG00000076382	SPAG5	protein_coding	2338.61	-2.92332	0.125648	-23.266	9.8028e-120	1.38762e-117	Down Regulated in MdU1_PMA
ENSG00000168060	NAALADL1	protein_coding	10.3126	-2.92277	1.15154	-2.53814	0.0111442	0.0257788	Down Regulated in MdU1_PMA
ENSG00000122952	ZWINT	protein_coding	1342.35	-2.92164	0.11958	-24.4324	7.73984e-132	1.43669e-129	Down Regulated in MdU1_PMA
ENSG00000188817	SNTN	protein_coding	0.454503	-2.92115	4.2472	-0.687782	0.49159	0.708988	Non Significant
ENSG00000178035	IMPDH2	protein_coding	6312.98	-2.92102	0.173186	-16.8664	7.95467e-64	3.18122e-62	Down Regulated in MdU1_PMA
ENSG00000175198	PCCA	protein_coding	1321.2	-2.91798	0.194453	-15.006	6.70257e-51	1.86271e-49	Down Regulated in MdU1_PMA
ENSG00000166035	LIPC	protein_coding	187.105	-2.91587	0.967476	-3.0139	0.00257913	0.00661027	Down Regulated in MdU1_PMA
ENSG00000066813	ACSM2B	protein_coding	1.28766	-2.91578	2.81201	-1.0369	0.299781	0.477925	Non Significant
ENSG00000072571	HMMR	protein_coding	1214.45	-2.91547	0.176325	-16.5346	2.06793e-61	7.75021e-60	Down Regulated in MdU1_PMA
ENSG00000058056	USP13	protein_coding	546.029	-2.91516	0.208654	-13.9713	2.33416e-44	5.40316e-43	Down Regulated in MdU1_PMA
ENSG00000244355	LY6G6D	protein_coding	0.748057	-2.91363	1.82646	-1.59524	0.11066	0.203928	Non Significant
ENSG00000066923	STAG3	protein_coding	1551.81	-2.91234	0.267997	-10.8671	1.65438e-27	2.17882e-26	Down Regulated in MdU1_PMA
ENSG00000196371	FUT4	protein_coding	3155.38	-2.91199	0.10945	-26.6056	5.84047e-156	1.88389e-153	Down Regulated in MdU1_PMA
ENSG00000088325	TPX2	protein_coding	6584.03	-2.91031	0.135463	-21.4841	2.19386e-102	2.18012e-100	Down Regulated in MdU1_PMA
ENSG00000261582	ENSG00000261582	protein_coding	0.545596	-2.91013	3.5836	-0.812068	0.416753	0.625431	Non Significant
ENSG00000248405	PRR5-ARHGAP8	protein_coding	24.3657	-2.90946	0.561142	-5.1849	2.16134e-07	8.94543e-07	Down Regulated in MdU1_PMA
ENSG00000174804	FZD4	protein_coding	14.1988	-2.90857	0.433384	-6.71132	1.92877e-11	1.10869e-10	Down Regulated in MdU1_PMA
ENSG00000106628	POLD2	protein_coding	2887.01	-2.90835	0.189107	-15.3794	2.25146e-53	6.7633e-52	Down Regulated in MdU1_PMA
ENSG00000146243	IRAK1BP1	protein_coding	1.9421	-2.90791	1.5657	-1.85726	0.0632735	0.124572	Non Significant
ENSG00000189431	RASSF10	protein_coding	1.21041	-2.90609	4.25884	-0.682368	0.495007	0.712543	Non Significant
ENSG00000198633	ZNF534	protein_coding	2.38173	-2.90379	1.46643	-1.98017	0.0476839	0.0965157	Non Significant
ENSG00000168813	ZNF507	protein_coding	738.572	-2.90132	0.168843	-17.1835	3.52751e-66	1.49263e-64	Down Regulated in MdU1_PMA
ENSG00000203618	GP1BB	protein_coding	0.737007	-2.89841	3.92518	-0.738415	0.460262	0.675275	Non Significant
ENSG00000075891	PAX2	protein_coding	5.16898	-2.89261	1.06304	-2.72108	0.00650692	0.015644	Down Regulated in MdU1_PMA
ENSG00000140009	ESR2	protein_coding	2.0359	-2.89181	1.30969	-2.20802	0.0272432	0.0582206	Non Significant
ENSG00000163638	ADAMTS9	protein_coding	70.9652	-2.88946	0.418395	-6.90607	4.98252e-12	2.98708e-11	Down Regulated in MdU1_PMA
ENSG00000105486	LIG1	protein_coding	1465.24	-2.88896	0.127676	-22.6273	2.33636e-113	2.85529e-111	Down Regulated in MdU1_PMA
ENSG00000171126	KCNG3	protein_coding	1.14116	-2.88864	2.98562	-0.967516	0.333286	0.522113	Non Significant
ENSG00000145555	MYO10	protein_coding	210.656	-2.88777	0.228173	-12.6561	1.03581e-36	1.85785e-35	Down Regulated in MdU1_PMA
ENSG00000161551	ZNF577	protein_coding	67.1372	-2.88441	0.419746	-6.87181	6.33928e-12	3.77403e-11	Down Regulated in MdU1_PMA
ENSG00000168263	KCNV2	protein_coding	3.42889	-2.88424	1.04471	-2.7608	0.005766	0.0139788	Down Regulated in MdU1_PMA
ENSG00000181754	AMIGO1	protein_coding	4.63388	-2.88288	0.876367	-3.28958	0.00100336	0.00274577	Down Regulated in MdU1_PMA
ENSG00000184709	LRRC26	protein_coding	0.608206	-2.88194	4.25112	-0.677925	0.497819	0.715911	Non Significant
ENSG00000188610	FAM72B	protein_coding	633.142	-2.87911	0.185846	-15.4919	3.9341e-54	1.21519e-52	Down Regulated in MdU1_PMA
ENSG00000150054	MPP7	protein_coding	371.236	-2.87894	0.169533	-16.9815	1.12492e-64	4.59209e-63	Down Regulated in MdU1_PMA
ENSG00000205436	EXOC3L4	protein_coding	1.43175	-2.87734	2.75908	-1.04286	0.297012	0.474119	Non Significant
ENSG00000109452	INPP4B	protein_coding	1437.02	-2.87706	0.220128	-13.07	4.88925e-39	9.45927e-38	Down Regulated in MdU1_PMA
ENSG00000130182	ZSCAN10	protein_coding	1.17271	-2.87562	1.47745	-1.94634	0.051614	0.103808	Non Significant
ENSG00000189325	BNIP5	protein_coding	29.6599	-2.87396	1.03862	-2.76709	0.00565584	0.013732	Down Regulated in MdU1_PMA
ENSG00000129195	PIMREG	protein_coding	256.458	-2.87326	0.255978	-11.2246	3.08681e-29	4.28624e-28	Down Regulated in MdU1_PMA
ENSG00000213822	CEACAM18	protein_coding	3.60033	-2.8728	1.56159	-1.83967	0.065817	0.128999	Non Significant
ENSG00000215475	SIAH3	protein_coding	2.81524	-2.87214	1.2553	-2.28802	0.0221365	0.0482185	Down Regulated in MdU1_PMA
ENSG00000165891	E2F7	protein_coding	131.429	-2.87161	1.05818	-2.71372	0.00665332	0.0159823	Down Regulated in MdU1_PMA
ENSG00000187546	AGMO	protein_coding	0.417414	-2.87128	4.24736	-0.676016	0.49903	0.717181	Non Significant
ENSG00000108852	MPP2	protein_coding	87.5457	-2.87062	1.0298	-2.78755	0.00531078	0.0129406	Down Regulated in MdU1_PMA
ENSG00000170442	KRT86	protein_coding	1.09013	-2.87013	2.15	-1.33494	0.181896	0.314139	Non Significant
ENSG00000101443	WFDC2	protein_coding	3.16605	-2.8684	1.16687	-2.4582	0.0139635	0.0316893	Down Regulated in MdU1_PMA
ENSG00000165066	NKX6-3	protein_coding	1.98865	-2.8677	2.52102	-1.13752	0.255322	0.418016	Non Significant
ENSG00000231192	OR5H1	protein_coding	0.556781	-2.86531	4.25114	-0.674011	0.500304	0.718697	Non Significant
ENSG00000188730	VWC2	protein_coding	1.12148	-2.86383	4.00077	-0.71582	0.474103	0.690331	Non Significant
ENSG00000132746	ALDH3B2	protein_coding	1.03995	-2.86382	2.30875	-1.24042	0.214821	0.36163	Non Significant
ENSG00000126970	ZC4H2	protein_coding	189.288	-2.86341	1.0668	-2.68411	0.00727236	0.017357	Down Regulated in MdU1_PMA
ENSG00000122642	FKBP9	protein_coding	14.5696	-2.86239	0.562538	-5.08835	3.61198e-07	1.46686e-06	Down Regulated in MdU1_PMA
ENSG00000145569	OTULINL	protein_coding	960.464	-2.86181	0.244887	-11.6863	1.49825e-31	2.26941e-30	Down Regulated in MdU1_PMA
ENSG00000198901	PRC1	protein_coding	3223.53	-2.86179	0.144637	-19.786	3.93243e-87	2.90882e-85	Down Regulated in MdU1_PMA
ENSG00000189369	GSPT2	protein_coding	99.3362	-2.86114	0.955046	-2.99582	0.00273712	0.00698425	Down Regulated in MdU1_PMA
ENSG00000047936	ROS1	protein_coding	533.754	-2.86094	0.588673	-4.85999	1.17392e-06	4.51663e-06	Down Regulated in MdU1_PMA
ENSG00000130234	ACE2	protein_coding	1.1457	-2.85918	4.26039	-0.671107	0.502152	0.721036	Non Significant
ENSG00000182264	IZUMO1	protein_coding	3.3169	-2.85777	1.54132	-1.85411	0.0637232	0.125344	Non Significant
ENSG00000196361	ELAVL3	protein_coding	8.71535	-2.85719	0.854272	-3.34459	0.000824047	0.00228398	Down Regulated in MdU1_PMA
ENSG00000174527	MYO1H	protein_coding	2.77681	-2.85598	1.27281	-2.24385	0.0248424	0.0535259	Non Significant
ENSG00000107249	GLIS3	protein_coding	4.1852	-2.85593	1.68519	-1.69472	0.0901281	0.170335	Non Significant
ENSG00000165309	ARMC3	protein_coding	1.28086	-2.85563	3.26666	-0.874173	0.382024	0.583685	Non Significant
ENSG00000181350	LRRC75A	protein_coding	718.194	-2.85544	0.353809	-8.07058	6.99662e-16	5.31117e-15	Down Regulated in MdU1_PMA
ENSG00000248383	PCDHAC1	protein_coding	0.757058	-2.85533	4.25221	-0.671493	0.501906	0.720787	Non Significant
ENSG00000126583	PRKCG	protein_coding	2.5651	-2.85453	1.18419	-2.41053	0.0159295	0.0357388	Down Regulated in MdU1_PMA
ENSG00000141576	RNF157	protein_coding	28.4739	-2.8539	0.571789	-4.99117	6.00131e-07	2.37972e-06	Down Regulated in MdU1_PMA
ENSG00000167695	TLCD3A	protein_coding	286.312	-2.85383	0.176129	-16.2031	4.7933e-59	1.69323e-57	Down Regulated in MdU1_PMA
ENSG00000170011	MYRIP	protein_coding	2.31223	-2.8538	1.67807	-1.70065	0.0890087	0.168576	Non Significant
ENSG00000153253	SCN3A	protein_coding	2.4076	-2.85254	2.27629	-1.25315	0.210151	0.355241	Non Significant
ENSG00000141338	ABCA8	protein_coding	1.98689	-2.85009	1.63088	-1.74758	0.0805368	0.154279	Non Significant
ENSG00000149218	ENDOD1	protein_coding	95.0041	-2.84934	0.263757	-10.8029	3.33508e-27	4.33142e-26	Down Regulated in MdU1_PMA
ENSG00000171815	PCDHB1	protein_coding	0.866881	-2.84669	2.59118	-1.09861	0.271939	0.440497	Non Significant
ENSG00000166851	PLK1	protein_coding	2125.16	-2.84491	0.154081	-18.4637	4.04493e-76	2.32714e-74	Down Regulated in MdU1_PMA
ENSG00000051180	RAD51	protein_coding	581.51	-2.84353	0.224235	-12.681	7.53397e-37	1.35874e-35	Down Regulated in MdU1_PMA
ENSG00000242550	SERPINB10	protein_coding	26.4663	-2.84184	0.424515	-6.69431	2.16689e-11	1.24013e-10	Down Regulated in MdU1_PMA
ENSG00000149972	CNTN5	protein_coding	2.33747	-2.84169	4.2728	-0.665066	0.506008	0.72546	Non Significant
ENSG00000087495	PHACTR3	protein_coding	374.244	-2.84047	0.192723	-14.7386	3.6426e-49	9.63331e-48	Down Regulated in MdU1_PMA
ENSG00000215788	TNFRSF25	protein_coding	0.956169	-2.8398	1.92921	-1.472	0.141021	0.252157	Non Significant
ENSG00000104804	TULP2	protein_coding	2.10254	-2.83901	1.87178	-1.51674	0.129332	0.233978	Non Significant
ENSG00000165194	PCDH19	protein_coding	1.62819	-2.83519	2.31716	-1.22357	0.221116	0.370144	Non Significant
ENSG00000005189	REXO5	protein_coding	598.061	-2.83471	0.187359	-15.1298	1.02956e-51	2.93163e-50	Down Regulated in MdU1_PMA
ENSG00000205592	MUC19	protein_coding	1193.45	-2.83415	0.256885	-11.0327	2.65619e-28	3.58951e-27	Down Regulated in MdU1_PMA
ENSG00000130844	ZNF331	protein_coding	6.22284	-2.83412	1.38027	-2.05331	0.0400426	0.0825523	Non Significant
ENSG00000156920	ADGRG4	protein_coding	1.70406	-2.83407	1.76017	-1.61011	0.107373	0.198802	Non Significant
ENSG00000083720	OXCT1	protein_coding	348.897	-2.83324	0.225874	-12.5434	4.3198e-36	7.58896e-35	Down Regulated in MdU1_PMA
ENSG00000111206	FOXM1	protein_coding	1271.11	-2.83006	0.199038	-14.2187	7.01121e-46	1.69059e-44	Down Regulated in MdU1_PMA
ENSG00000112394	SLC16A10	protein_coding	291.602	-2.82908	0.291047	-9.72037	2.4689e-22	2.61172e-21	Down Regulated in MdU1_PMA
ENSG00000165985	C1QL3	protein_coding	29.3724	-2.82662	0.339168	-8.33397	7.81773e-17	6.27587e-16	Down Regulated in MdU1_PMA
ENSG00000012817	KDM5D	protein_coding	1.6702	-2.82627	3.5181	-0.803351	0.421772	0.631135	Non Significant
ENSG00000163687	DNASE1L3	protein_coding	0.615638	-2.82548	3.00489	-0.940294	0.347067	0.53962	Non Significant
ENSG00000168502	MTCL1	protein_coding	47.6126	-2.82523	0.479807	-5.88826	3.90278e-09	1.8725e-08	Down Regulated in MdU1_PMA
ENSG00000175414	ARL10	protein_coding	13.0001	-2.82122	1.45264	-1.94213	0.0521212	0.104711	Non Significant
ENSG00000157654	PALM2AKAP2	protein_coding	3975.47	-2.82112	0.191921	-14.6993	6.50933e-49	1.71227e-47	Down Regulated in MdU1_PMA
ENSG00000128578	STRIP2	protein_coding	363.609	-2.81829	0.178167	-15.8183	2.32774e-56	7.73658e-55	Down Regulated in MdU1_PMA
ENSG00000113504	SLC12A7	protein_coding	16.8675	-2.81689	1.06924	-2.63447	0.00842682	0.0199047	Down Regulated in MdU1_PMA
ENSG00000121966	CXCR4	protein_coding	2802.79	-2.81605	0.195783	-14.3835	6.56906e-47	1.64444e-45	Down Regulated in MdU1_PMA
ENSG00000232258	TMEM114	protein_coding	0.974693	-2.81512	3.05621	-0.921114	0.356991	0.55217	Non Significant
ENSG00000166833	NAV2	protein_coding	65.3528	-2.81389	0.456742	-6.16079	7.23825e-10	3.6538e-09	Down Regulated in MdU1_PMA
ENSG00000198478	SH3BGRL2	protein_coding	0.442017	-2.81143	4.2479	-0.66184	0.508074	0.727248	Non Significant
ENSG00000164675	IQUB	protein_coding	1.34576	-2.81075	1.44493	-1.94525	0.0517453	0.104019	Non Significant
ENSG00000162975	KCNF1	protein_coding	1.38102	-2.8107	3.30483	-0.850484	0.395056	0.599593	Non Significant
ENSG00000167210	LOXHD1	protein_coding	4.73642	-2.81061	1.50968	-1.86173	0.0626411	0.123463	Non Significant
ENSG00000174788	PCP2	protein_coding	2.7251	-2.81038	1.07493	-2.61448	0.00893631	0.02104	Down Regulated in MdU1_PMA
ENSG00000096088	PGC	protein_coding	1.25641	-2.80929	1.80106	-1.5598	0.118808	0.217196	Non Significant
ENSG00000104889	RNASEH2A	protein_coding	1353.51	-2.80784	0.232715	-12.0656	1.60559e-33	2.56424e-32	Down Regulated in MdU1_PMA
ENSG00000101224	CDC25B	protein_coding	1150.03	-2.80515	0.1807	-15.5238	2.3931e-54	7.47407e-53	Down Regulated in MdU1_PMA
ENSG00000274997	H2AC12	protein_coding	0.615204	-2.80495	2.43905	-1.15001	0.250138	0.410964	Non Significant
ENSG00000164161	HHIP	protein_coding	1.50632	-2.80303	1.60076	-1.75106	0.079936	0.153288	Non Significant
ENSG00000101276	SLC52A3	protein_coding	0.821702	-2.79731	3.67762	-0.760631	0.446878	0.660118	Non Significant
ENSG00000268643	ENSG00000268643	protein_coding	0.527996	-2.79655	3.64288	-0.767674	0.442681	0.655345	Non Significant
ENSG00000134595	SOX3	protein_coding	1.10453	-2.79444	4.05584	-0.688992	0.490828	0.708342	Non Significant
ENSG00000198914	POU3F3	protein_coding	1.9171	-2.79429	3.5394	-0.78948	0.429831	0.640467	Non Significant
ENSG00000196814	MVB12B	protein_coding	887.408	-2.79313	0.184995	-15.0984	1.65932e-51	4.70443e-50	Down Regulated in MdU1_PMA
ENSG00000196329	GIMAP5	protein_coding	211.938	-2.7874	0.298253	-9.34576	9.12297e-21	8.9528e-20	Down Regulated in MdU1_PMA
ENSG00000154359	LONRF1	protein_coding	307.261	-2.78721	0.179639	-15.5157	2.71801e-54	8.44857e-53	Down Regulated in MdU1_PMA
ENSG00000133119	RFC3	protein_coding	1053.16	-2.78553	0.142276	-19.5784	2.36342e-85	1.67879e-83	Down Regulated in MdU1_PMA
ENSG00000136929	HEMGN	protein_coding	0.475882	-2.78396	2.4441	-1.13906	0.25468	0.417173	Non Significant
ENSG00000090889	KIF4A	protein_coding	1762.56	-2.78298	0.152113	-18.2955	8.98219e-75	4.99248e-73	Down Regulated in MdU1_PMA
ENSG00000125285	SOX21	protein_coding	0.939348	-2.78287	4.26021	-0.653225	0.513611	0.73273	Non Significant
ENSG00000181026	AEN	protein_coding	519.318	-2.78247	0.166119	-16.7499	5.67003e-63	2.19613e-61	Down Regulated in MdU1_PMA
ENSG00000185615	PDIA2	protein_coding	1.73603	-2.78236	2.04953	-1.35756	0.174603	0.3033	Non Significant
ENSG00000180929	GPR62	protein_coding	4.97888	-2.78144	1.02835	-2.70475	0.00683567	0.0163843	Down Regulated in MdU1_PMA
ENSG00000189337	KAZN	protein_coding	217.194	-2.77555	0.193174	-14.3682	8.19815e-47	2.04186e-45	Down Regulated in MdU1_PMA
ENSG00000186193	SAPCD2	protein_coding	678.395	-2.77495	0.19074	-14.5484	5.98178e-48	1.53652e-46	Down Regulated in MdU1_PMA
ENSG00000112812	PRSS16	protein_coding	2.32925	-2.77447	1.80968	-1.53313	0.125244	0.227564	Non Significant
ENSG00000187867	PALM3	protein_coding	0.644685	-2.77408	4.05213	-0.684597	0.493598	0.711021	Non Significant
ENSG00000284946	ENSG00000284946	protein_coding	637.075	-2.77382	0.203904	-13.6035	3.81571e-42	8.32349e-41	Down Regulated in MdU1_PMA
ENSG00000121152	NCAPH	protein_coding	1905.85	-2.77289	0.111314	-24.9105	5.73085e-137	1.22566e-134	Down Regulated in MdU1_PMA
ENSG00000120942	UBIAD1	protein_coding	385.283	-2.77266	0.203066	-13.654	1.91044e-42	4.22358e-41	Down Regulated in MdU1_PMA
ENSG00000272305	ENSG00000272305	protein_coding	1.68621	-2.76987	1.47473	-1.87823	0.0603504	0.119366	Non Significant
ENSG00000132975	GPR12	protein_coding	0.902234	-2.76899	2.73728	-1.01158	0.311737	0.494177	Non Significant
ENSG00000118276	B4GALT6	protein_coding	312.786	-2.7687	1.11135	-2.49129	0.0127282	0.0291175	Down Regulated in MdU1_PMA
ENSG00000130035	GALNT8	protein_coding	5.00666	-2.76796	1.12355	-2.46358	0.0137557	0.0312537	Down Regulated in MdU1_PMA
ENSG00000165370	GPR101	protein_coding	0.931446	-2.76738	4.22826	-0.654495	0.512793	0.731828	Non Significant
ENSG00000112984	KIF20A	protein_coding	735.855	-2.76694	0.187245	-14.7771	2.05862e-49	5.49599e-48	Down Regulated in MdU1_PMA
ENSG00000125337	KIF25	protein_coding	73.5948	-2.76683	0.285507	-9.69094	3.29466e-22	3.46476e-21	Down Regulated in MdU1_PMA
ENSG00000149554	CHEK1	protein_coding	1018.04	-2.76662	0.127837	-21.6418	7.26864e-104	7.37205e-102	Down Regulated in MdU1_PMA
ENSG00000168297	PXK	protein_coding	3607.45	-2.76656	0.0996018	-27.7763	8.3983e-170	3.59228e-167	Down Regulated in MdU1_PMA
ENSG00000115607	IL18RAP	protein_coding	1287.92	-2.76651	0.217945	-12.6936	6.41477e-37	1.16008e-35	Down Regulated in MdU1_PMA
ENSG00000139514	SLC7A1	protein_coding	2519.01	-2.76643	0.110738	-24.9816	9.68159e-138	2.16471e-135	Down Regulated in MdU1_PMA
ENSG00000198963	RORB	protein_coding	580.697	-2.76636	0.190891	-14.4918	1.36477e-47	3.46492e-46	Down Regulated in MdU1_PMA
ENSG00000198826	ARHGAP11A	protein_coding	2480.5	-2.76412	0.222644	-12.4149	2.16866e-35	3.70726e-34	Down Regulated in MdU1_PMA
ENSG00000170456	DENND5B	protein_coding	7.66731	-2.76323	1.34905	-2.04827	0.0405331	0.0834323	Non Significant
ENSG00000124466	LYPD3	protein_coding	2.98143	-2.76182	0.901548	-3.06342	0.00218823	0.00567717	Down Regulated in MdU1_PMA
ENSG00000128951	DUT	protein_coding	4654.74	-2.75821	0.127319	-21.6638	4.50625e-104	4.61797e-102	Down Regulated in MdU1_PMA
ENSG00000183479	TREX2	protein_coding	14.0504	-2.75793	0.597981	-4.61208	3.98664e-06	1.464e-05	Down Regulated in MdU1_PMA
ENSG00000149257	SERPINH1	protein_coding	2.70316	-2.75776	1.74938	-1.57643	0.114927	0.210884	Non Significant
ENSG00000213397	HAUS7	protein_coding	315.035	-2.75718	0.234219	-11.7718	5.45539e-32	8.37288e-31	Down Regulated in MdU1_PMA
ENSG00000284512	ENSG00000284512	protein_coding	12.5042	-2.75638	0.7238	-3.8082	0.00013998	0.000429653	Down Regulated in MdU1_PMA
ENSG00000162409	PRKAA2	protein_coding	1.17822	-2.75619	3.99234	-0.69037	0.489962	0.707484	Non Significant
ENSG00000164038	SLC9B2	protein_coding	249.669	-2.75603	0.156048	-17.6614	8.31082e-70	3.93086e-68	Down Regulated in MdU1_PMA
ENSG00000115687	PASK	protein_coding	299.015	-2.75508	0.271753	-10.1382	3.73992e-24	4.25357e-23	Down Regulated in MdU1_PMA
ENSG00000223802	CERS1	protein_coding	83.676	-2.75458	0.258538	-10.6545	1.66163e-26	2.08775e-25	Down Regulated in MdU1_PMA
ENSG00000070081	NUCB2	protein_coding	6380.17	-2.75411	0.12897	-21.3546	3.53286e-101	3.44122e-99	Down Regulated in MdU1_PMA
ENSG00000273703	H2BC14	protein_coding	0.689096	-2.74999	3.33988	-0.82338	0.410292	0.617572	Non Significant
ENSG00000105281	SLC1A5	protein_coding	7709.37	-2.74966	0.162228	-16.9493	1.94677e-64	7.89786e-63	Down Regulated in MdU1_PMA
ENSG00000166508	MCM7	protein_coding	9037.26	-2.74885	0.10246	-26.8284	1.50858e-158	5.11772e-156	Down Regulated in MdU1_PMA
ENSG00000284526	ENSG00000284526	protein_coding	186.415	-2.74829	0.239791	-11.4612	2.06595e-30	3.01555e-29	Down Regulated in MdU1_PMA
ENSG00000171791	BCL2	protein_coding	3713.72	-2.74753	0.15755	-17.4391	4.16228e-68	1.86554e-66	Down Regulated in MdU1_PMA
ENSG00000162062	TEDC2	protein_coding	124.55	-2.74632	0.284645	-9.64823	5.00091e-22	5.23115e-21	Down Regulated in MdU1_PMA
ENSG00000164323	CFAP97	protein_coding	936.935	-2.74592	0.155725	-17.6331	1.37178e-69	6.45722e-68	Down Regulated in MdU1_PMA
ENSG00000135451	TROAP	protein_coding	539.454	-2.74474	0.181105	-15.1556	6.96293e-52	1.99422e-50	Down Regulated in MdU1_PMA
ENSG00000166006	KCNC2	protein_coding	0.699746	-2.74375	4.25932	-0.644176	0.519461	0.738559	Non Significant
ENSG00000249158	PCDHA11	protein_coding	0.940079	-2.74265	4.18343	-0.655598	0.512083	0.731186	Non Significant
ENSG00000198889	DCAF12L1	protein_coding	0.979927	-2.74259	3.05911	-0.896533	0.369968	0.568977	Non Significant
ENSG00000144218	AFF3	protein_coding	13.0626	-2.74054	0.715818	-3.82855	0.000128903	0.000397787	Down Regulated in MdU1_PMA
ENSG00000112238	PRDM13	protein_coding	30.8554	-2.73988	0.365197	-7.50247	6.26258e-14	4.23154e-13	Down Regulated in MdU1_PMA
ENSG00000183318	SPDYE4	protein_coding	1.52548	-2.7368	1.8362	-1.49047	0.136101	0.244738	Non Significant
ENSG00000198915	RASGEF1A	protein_coding	1.11231	-2.73597	1.50984	-1.81209	0.0699721	0.136287	Non Significant
ENSG00000184292	TACSTD2	protein_coding	1.79083	-2.73425	1.74871	-1.56358	0.117915	0.215783	Non Significant
ENSG00000182885	ADGRG3	protein_coding	76.8136	-2.73108	0.421502	-6.4794	9.20898e-11	5.00957e-10	Down Regulated in MdU1_PMA
ENSG00000148468	FAM171A1	protein_coding	1.01876	-2.73073	3.47896	-0.784927	0.432497	0.643269	Non Significant
ENSG00000162981	LRATD1	protein_coding	1.59662	-2.73033	2.11839	-1.28887	0.197444	0.336823	Non Significant
ENSG00000167550	RHEBL1	protein_coding	89.4255	-2.72918	0.271606	-10.0483	9.34589e-24	1.04905e-22	Down Regulated in MdU1_PMA
ENSG00000204116	CHIC1	protein_coding	77.3903	-2.72565	1.11692	-2.44033	0.0146738	0.0331484	Down Regulated in MdU1_PMA
ENSG00000105261	OVOL3	protein_coding	0.582839	-2.72514	2.35023	-1.15952	0.246245	0.405551	Non Significant
ENSG00000156413	FUT6	protein_coding	2.58769	-2.72466	0.998478	-2.72881	0.00635638	0.0153082	Down Regulated in MdU1_PMA
ENSG00000142945	KIF2C	protein_coding	2197.33	-2.72457	0.15293	-17.8158	5.32546e-71	2.67306e-69	Down Regulated in MdU1_PMA
ENSG00000221866	PLXNA4	protein_coding	3.90352	-2.72439	1.18217	-2.30457	0.0211908	0.046338	Down Regulated in MdU1_PMA
ENSG00000168229	PTGDR	protein_coding	0.770966	-2.72421	4.25636	-0.640034	0.522151	0.74174	Non Significant
ENSG00000182177	ASB18	protein_coding	1.24883	-2.7234	4.25906	-0.639436	0.522539	0.742131	Non Significant
ENSG00000172000	ZNF556	protein_coding	3.45687	-2.72077	1.29943	-2.09381	0.0362765	0.0754999	Non Significant
ENSG00000142513	ACP4	protein_coding	0.761186	-2.71984	2.33975	-1.16245	0.245053	0.403893	Non Significant
ENSG00000118965	WDR35	protein_coding	94.7465	-2.7178	1.0304	-2.63763	0.00834888	0.0197301	Down Regulated in MdU1_PMA
ENSG00000142856	ITGB3BP	protein_coding	704.66	-2.71478	0.204107	-13.3008	2.29022e-40	4.66967e-39	Down Regulated in MdU1_PMA
ENSG00000251493	FOXD1	protein_coding	104.147	-2.71417	0.279858	-9.69838	3.06338e-22	3.23018e-21	Down Regulated in MdU1_PMA
ENSG00000136104	RNASEH2B	protein_coding	3940.57	-2.71313	0.207652	-13.0657	5.16762e-39	9.96844e-38	Down Regulated in MdU1_PMA
ENSG00000150760	DOCK1	protein_coding	2.46571	-2.712	4.25913	-0.636749	0.524289	0.743703	Non Significant
ENSG00000205208	C4orf46	protein_coding	980.575	-2.71074	0.134352	-20.1764	1.57731e-90	1.24639e-88	Down Regulated in MdU1_PMA
ENSG00000132846	ZBED3	protein_coding	1054.35	-2.7105	0.191654	-14.1427	2.07146e-45	4.91654e-44	Down Regulated in MdU1_PMA
ENSG00000078295	ADCY2	protein_coding	2.751	-2.7095	1.80074	-1.50466	0.13241	0.23891	Non Significant
ENSG00000125968	ID1	protein_coding	21.935	-2.70941	0.374028	-7.24387	4.36066e-13	2.79207e-12	Down Regulated in MdU1_PMA
ENSG00000151640	DPYSL4	protein_coding	2.85548	-2.7079	1.62319	-1.66826	0.0952632	0.178906	Non Significant
ENSG00000183048	SLC25A10	protein_coding	416.233	-2.70503	0.18539	-14.591	3.20288e-48	8.2812e-47	Down Regulated in MdU1_PMA
ENSG00000255152	MSH5-SAPCD1	protein_coding	305.271	-2.70428	0.36178	-7.47491	7.72541e-14	5.17553e-13	Down Regulated in MdU1_PMA
ENSG00000174450	GOLGA6L2	protein_coding	0.733369	-2.70328	4.26097	-0.634427	0.525802	0.745473	Non Significant
ENSG00000166923	GREM1	protein_coding	7.86733	-2.70091	0.878096	-3.07588	0.00209886	0.00546042	Down Regulated in MdU1_PMA
ENSG00000166448	TMEM130	protein_coding	2.24143	-2.69932	1.76134	-1.53254	0.125389	0.227744	Non Significant
ENSG00000118508	RAB32	protein_coding	624.574	-2.69793	0.210827	-12.7968	1.70746e-37	3.16645e-36	Down Regulated in MdU1_PMA
ENSG00000164142	FHIP1A	protein_coding	5.77821	-2.69781	0.912797	-2.95554	0.00312117	0.00788752	Down Regulated in MdU1_PMA
ENSG00000174358	SLC6A19	protein_coding	1.92902	-2.69694	2.06944	-1.30322	0.1925	0.329589	Non Significant
ENSG00000107566	ERLIN1	protein_coding	4151.08	-2.69682	0.103976	-25.9369	2.55511e-148	7.18204e-146	Down Regulated in MdU1_PMA
ENSG00000237452	MEIOSIN	protein_coding	1.42924	-2.69644	1.66045	-1.62393	0.104392	0.193958	Non Significant
ENSG00000256407	ENSG00000256407	protein_coding	6.00155	-2.69442	0.83112	-3.24191	0.0011873	0.00320589	Down Regulated in MdU1_PMA
ENSG00000187902	SHISA7	protein_coding	3.14945	-2.69182	1.24034	-2.17023	0.0299894	0.0636539	Non Significant
ENSG00000007866	TEAD3	protein_coding	23.0493	-2.68842	0.400333	-6.71546	1.87469e-11	1.0795e-10	Down Regulated in MdU1_PMA
ENSG00000184661	CDCA2	protein_coding	577.744	-2.68693	0.176972	-15.1828	4.59638e-52	1.32802e-50	Down Regulated in MdU1_PMA
ENSG00000112041	TULP1	protein_coding	2.47	-2.68436	1.00699	-2.66573	0.00768203	0.0182616	Down Regulated in MdU1_PMA
ENSG00000182557	SPNS3	protein_coding	221.058	-2.68268	0.303614	-8.83583	9.93613e-19	8.88248e-18	Down Regulated in MdU1_PMA
ENSG00000106125	MINDY4	protein_coding	2.4691	-2.67499	1.62947	-1.64163	0.100666	0.187709	Non Significant
ENSG00000204219	TCEA3	protein_coding	26.026	-2.67487	0.36355	-7.35766	1.87163e-13	1.22509e-12	Down Regulated in MdU1_PMA
ENSG00000184575	XPOT	protein_coding	6522.11	-2.67297	0.151244	-17.6733	6.73384e-70	3.20036e-68	Down Regulated in MdU1_PMA
ENSG00000213160	KLHL23	protein_coding	423.711	-2.66757	0.20026	-13.3206	1.75806e-40	3.6033e-39	Down Regulated in MdU1_PMA
ENSG00000273003	ARL2-SNX15	protein_coding	1.6465	-2.66527	2.58969	-1.02919	0.303392	0.48286	Non Significant
ENSG00000067646	ZFY	protein_coding	1.0868	-2.66291	4.26594	-0.624226	0.532479	0.752392	Non Significant
ENSG00000088387	DOCK9	protein_coding	43.4069	-2.66012	0.562371	-4.73019	2.24313e-06	8.42287e-06	Down Regulated in MdU1_PMA
ENSG00000010318	PHF7	protein_coding	367.452	-2.6595	0.227523	-11.6889	1.45274e-31	2.20217e-30	Down Regulated in MdU1_PMA
ENSG00000187079	TEAD1	protein_coding	8.62151	-2.6586	1.03246	-2.57502	0.0100234	0.0234116	Down Regulated in MdU1_PMA
ENSG00000064270	ATP2C2	protein_coding	4.48521	-2.6578	0.950309	-2.79678	0.00516153	0.0125956	Down Regulated in MdU1_PMA
ENSG00000079101	CLUL1	protein_coding	4.22319	-2.65644	1.43992	-1.84485	0.0650588	0.127703	Non Significant
ENSG00000095777	MYO3A	protein_coding	0.77043	-2.65533	4.24932	-0.624883	0.532048	0.752052	Non Significant
ENSG00000097046	CDC7	protein_coding	973.9	-2.65406	0.141653	-18.7363	2.50269e-78	1.51984e-76	Down Regulated in MdU1_PMA
ENSG00000152784	PRDM8	protein_coding	334.529	-2.65398	0.218958	-12.121	8.18009e-34	1.31604e-32	Down Regulated in MdU1_PMA
ENSG00000186897	C1QL4	protein_coding	7.75897	-2.65383	0.705987	-3.75904	0.000170569	0.00051808	Down Regulated in MdU1_PMA
ENSG00000171136	RLN3	protein_coding	1.22779	-2.6536	1.64851	-1.60969	0.107466	0.198955	Non Significant
ENSG00000204252	HLA-DOA	protein_coding	0.716763	-2.65223	2.48085	-1.06908	0.285033	0.458021	Non Significant
ENSG00000115112	TFCP2L1	protein_coding	1.28834	-2.65111	2.4392	-1.08688	0.277091	0.447659	Non Significant
ENSG00000177354	C10orf71	protein_coding	1.87458	-2.65096	2.92215	-0.907197	0.364302	0.561851	Non Significant
ENSG00000173585	CCR9	protein_coding	3.2233	-2.64881	1.24802	-2.12241	0.0338036	0.070946	Non Significant
ENSG00000169684	CHRNA5	protein_coding	103.154	-2.64875	0.341737	-7.75085	9.12806e-15	6.51682e-14	Down Regulated in MdU1_PMA
ENSG00000166106	ADAMTS15	protein_coding	17.5759	-2.64862	1.08778	-2.43488	0.0148966	0.0335978	Down Regulated in MdU1_PMA
ENSG00000182795	C1orf116	protein_coding	2.04744	-2.64846	1.27416	-2.0786	0.0376542	0.078103	Non Significant
ENSG00000178695	KCTD12	protein_coding	46.7107	-2.64829	0.980863	-2.69996	0.00693473	0.0165995	Down Regulated in MdU1_PMA
ENSG00000163393	SLC22A15	protein_coding	355.939	-2.64803	0.142467	-18.587	4.09661e-77	2.42057e-75	Down Regulated in MdU1_PMA
ENSG00000099998	GGT5	protein_coding	13.2219	-2.64632	0.668803	-3.9568	7.59616e-05	0.000241146	Down Regulated in MdU1_PMA
ENSG00000178921	PFAS	protein_coding	625.199	-2.64457	0.208237	-12.6998	5.9279e-37	1.075e-35	Down Regulated in MdU1_PMA
ENSG00000068985	PAGE1	protein_coding	0.508998	-2.6443	2.6831	-0.985541	0.324359	0.510281	Non Significant
ENSG00000285708	ENSG00000285708	protein_coding	6.74734	-2.64404	1.28038	-2.06505	0.038918	0.0805121	Non Significant
ENSG00000108106	UBE2S	protein_coding	2977.03	-2.64367	0.223474	-11.8299	2.73523e-32	4.231e-31	Down Regulated in MdU1_PMA
ENSG00000138658	ZGRF1	protein_coding	822.858	-2.64339	0.202507	-13.0533	6.08706e-39	1.16962e-37	Down Regulated in MdU1_PMA
ENSG00000161798	AQP5	protein_coding	0.53103	-2.63925	4.17792	-0.631713	0.527574	0.74734	Non Significant
ENSG00000136811	ODF2	protein_coding	778.109	-2.63859	0.138338	-19.0736	4.18535e-81	2.73591e-79	Down Regulated in MdU1_PMA
ENSG00000185130	H2BC13	protein_coding	2.56575	-2.63767	1.11648	-2.36249	0.0181525	0.040249	Down Regulated in MdU1_PMA
ENSG00000151023	ENKUR	protein_coding	0.679688	-2.63677	4.25527	-0.619648	0.535489	0.755831	Non Significant
ENSG00000228716	DHFR	protein_coding	4192.69	-2.63507	0.152143	-17.3197	3.34286e-67	1.4584e-65	Down Regulated in MdU1_PMA
ENSG00000179409	GEMIN4	protein_coding	980.276	-2.63504	0.156927	-16.7915	2.81672e-63	1.10622e-61	Down Regulated in MdU1_PMA
ENSG00000117411	B4GALT2	protein_coding	289.863	-2.63442	0.215578	-12.2203	2.42337e-34	3.97353e-33	Down Regulated in MdU1_PMA
ENSG00000138180	CEP55	protein_coding	1105.91	-2.63429	0.171277	-15.3803	2.21862e-53	6.67485e-52	Down Regulated in MdU1_PMA
ENSG00000166197	NOLC1	protein_coding	3187.17	-2.63365	0.129259	-20.375	2.78939e-92	2.24935e-90	Down Regulated in MdU1_PMA
ENSG00000286095	SPEGNB	protein_coding	1.2377	-2.63311	2.09195	-1.25869	0.208143	0.352446	Non Significant
ENSG00000132646	PCNA	protein_coding	5596.65	-2.63233	0.149364	-17.6236	1.62372e-69	7.58868e-68	Down Regulated in MdU1_PMA
ENSG00000124491	F13A1	protein_coding	95.7837	-2.63058	0.691517	-3.80407	0.000142338	0.000436169	Down Regulated in MdU1_PMA
ENSG00000092853	CLSPN	protein_coding	820.341	-2.63038	0.194765	-13.5054	1.45417e-41	3.08655e-40	Down Regulated in MdU1_PMA
ENSG00000174611	KY	protein_coding	4.29724	-2.63002	1.09714	-2.39716	0.0165228	0.0369644	Down Regulated in MdU1_PMA
ENSG00000155792	DEPTOR	protein_coding	264.302	-2.62863	0.224343	-11.717	1.04273e-31	1.58922e-30	Down Regulated in MdU1_PMA
ENSG00000185269	NOTUM	protein_coding	1.87362	-2.62464	1.95521	-1.34239	0.179471	0.31066	Non Significant
ENSG00000147144	CCDC120	protein_coding	1.3126	-2.62286	1.44441	-1.81587	0.0693901	0.135287	Non Significant
ENSG00000133020	MYH8	protein_coding	0.744724	-2.62274	4.2626	-0.615291	0.538363	0.758857	Non Significant
ENSG00000151632	AKR1C2	protein_coding	38.2869	-2.62039	1.07756	-2.43179	0.0150246	0.0338669	Down Regulated in MdU1_PMA
ENSG00000165182	CXorf58	protein_coding	1.64063	-2.61576	1.3896	-1.88239	0.0597832	0.118357	Non Significant
ENSG00000137054	POLR1E	protein_coding	489.382	-2.61543	0.16207	-16.1377	1.38659e-58	4.85455e-57	Down Regulated in MdU1_PMA
ENSG00000163584	RPL22L1	protein_coding	730.012	-2.61388	0.256267	-10.1999	1.98559e-24	2.29006e-23	Down Regulated in MdU1_PMA
ENSG00000205108	FAM205A	protein_coding	1.27229	-2.60965	1.59813	-1.63294	0.102482	0.190788	Non Significant
ENSG00000162620	LRRIQ3	protein_coding	6.17472	-2.60814	0.926341	-2.81553	0.0048697	0.0119263	Down Regulated in MdU1_PMA
ENSG00000226887	ERVMER34-1	protein_coding	1.24008	-2.60602	1.53645	-1.69613	0.0898605	0.169944	Non Significant
ENSG00000137960	GIPC2	protein_coding	3.32114	-2.60358	1.44102	-1.80676	0.0708001	0.1376	Non Significant
ENSG00000162063	CCNF	protein_coding	754.405	-2.6029	0.164305	-15.8419	1.59909e-56	5.35096e-55	Down Regulated in MdU1_PMA
ENSG00000083844	ZNF264	protein_coding	111.655	-2.60262	1.12997	-2.30326	0.021264	0.0464826	Down Regulated in MdU1_PMA
ENSG00000119698	PPP4R4	protein_coding	39.8214	-2.6021	0.346482	-7.51006	5.90989e-14	3.99873e-13	Down Regulated in MdU1_PMA
ENSG00000134258	VTCN1	protein_coding	1.0064	-2.60209	2.11774	-1.22871	0.219181	0.367356	Non Significant
ENSG00000130396	AFDN	protein_coding	1139.6	-2.60197	0.200591	-12.9715	1.77526e-38	3.37814e-37	Down Regulated in MdU1_PMA
ENSG00000113763	UNC5A	protein_coding	33.5573	-2.60174	0.309409	-8.40873	4.14473e-17	3.36019e-16	Down Regulated in MdU1_PMA
ENSG00000157985	AGAP1	protein_coding	2.8761	-2.60096	2.02168	-1.28653	0.198257	0.338091	Non Significant
ENSG00000197467	COL13A1	protein_coding	1.8357	-2.59915	2.01109	-1.29241	0.196217	0.335048	Non Significant
ENSG00000112541	PDE10A	protein_coding	5.73871	-2.59763	3.92002	-0.662657	0.50755	0.726877	Non Significant
ENSG00000184702	SEPTIN5	protein_coding	8.01879	-2.59753	0.925526	-2.80655	0.00500756	0.0122426	Down Regulated in MdU1_PMA
ENSG00000130487	KLHDC7B	protein_coding	1.11952	-2.59434	2.89468	-0.896243	0.370123	0.569154	Non Significant
ENSG00000169860	P2RY1	protein_coding	2.96365	-2.59266	1.35707	-1.91049	0.0560708	0.111721	Non Significant
ENSG00000153574	RPIA	protein_coding	1088.14	-2.59206	0.142141	-18.2358	2.68073e-74	1.46517e-72	Down Regulated in MdU1_PMA
ENSG00000130383	FUT5	protein_coding	4.21621	-2.58953	1.6139	-1.60452	0.1086	0.200767	Non Significant
ENSG00000111713	GYS2	protein_coding	0.348296	-2.58763	4.25347	-0.608358	0.54295	0.76335	Non Significant
ENSG00000033867	SLC4A7	protein_coding	2047.58	-2.58486	0.179778	-14.378	7.10871e-47	1.77501e-45	Down Regulated in MdU1_PMA
ENSG00000126787	DLGAP5	protein_coding	863.733	-2.58471	0.178023	-14.519	9.18264e-48	2.34342e-46	Down Regulated in MdU1_PMA
ENSG00000198795	ZNF521	protein_coding	4.62839	-2.58326	1.87792	-1.3756	0.168946	0.294801	Non Significant
ENSG00000002587	HS3ST1	protein_coding	11.9471	-2.58242	1.10919	-2.32822	0.0199007	0.0437748	Down Regulated in MdU1_PMA
ENSG00000184471	C1QTNF8	protein_coding	2.31563	-2.57935	1.91265	-1.34858	0.177473	0.307715	Non Significant
ENSG00000037280	FLT4	protein_coding	1.66512	-2.57869	2.13415	-1.2083	0.226932	0.378239	Non Significant
ENSG00000130707	ASS1	protein_coding	2376.73	-2.57607	0.212891	-12.1004	1.05117e-33	1.68701e-32	Down Regulated in MdU1_PMA
ENSG00000112299	VNN1	protein_coding	19.786	-2.57582	1.04255	-2.47069	0.0134853	0.0306784	Down Regulated in MdU1_PMA
ENSG00000113555	PCDH12	protein_coding	174.719	-2.5758	0.245274	-10.5017	8.48053e-26	1.03513e-24	Down Regulated in MdU1_PMA
ENSG00000111981	ULBP1	protein_coding	131.173	-2.57484	0.232068	-11.0952	1.32403e-28	1.80664e-27	Down Regulated in MdU1_PMA
ENSG00000165682	CLEC1B	protein_coding	69.3125	-2.57256	0.323971	-7.94072	2.01003e-15	1.48515e-14	Down Regulated in MdU1_PMA
ENSG00000006377	DLX6	protein_coding	34.115	-2.5723	1.02426	-2.51137	0.0120262	0.0276563	Down Regulated in MdU1_PMA
ENSG00000134769	DTNA	protein_coding	3.2159	-2.57206	4.24685	-0.605639	0.544755	0.765536	Non Significant
ENSG00000130822	PNCK	protein_coding	8.41998	-2.57096	0.968432	-2.65476	0.00793643	0.0188073	Down Regulated in MdU1_PMA
ENSG00000133640	LRRIQ1	protein_coding	1.04343	-2.56978	2.93398	-0.87587	0.381101	0.582818	Non Significant
ENSG00000166037	CEP57	protein_coding	2246.98	-2.56877	0.123255	-20.8411	1.83629e-96	1.59871e-94	Down Regulated in MdU1_PMA
ENSG00000107833	NPM3	protein_coding	962.161	-2.5684	0.229719	-11.1806	5.0731e-29	7.00479e-28	Down Regulated in MdU1_PMA
ENSG00000065911	MTHFD2	protein_coding	4969.44	-2.56795	0.123264	-20.8329	2.17843e-96	1.88823e-94	Down Regulated in MdU1_PMA
ENSG00000198691	ABCA4	protein_coding	12.2974	-2.56702	1.00954	-2.54275	0.0109985	0.0254775	Down Regulated in MdU1_PMA
ENSG00000124302	CHST8	protein_coding	0.819202	-2.56614	4.26415	-0.601794	0.547311	0.768054	Non Significant
ENSG00000166407	LMO1	protein_coding	65.2769	-2.5651	0.350711	-7.31401	2.59292e-13	1.68655e-12	Down Regulated in MdU1_PMA
ENSG00000181315	ZNF322	protein_coding	72.4536	-2.56427	1.08972	-2.35314	0.0186155	0.0411826	Down Regulated in MdU1_PMA
ENSG00000277400	ENSG00000277400	protein_coding	2.30714	-2.56361	1.91207	-1.34075	0.18	0.311385	Non Significant
ENSG00000073536	NLE1	protein_coding	571.805	-2.56333	0.256166	-10.0065	1.42727e-23	1.5884e-22	Down Regulated in MdU1_PMA
ENSG00000116147	TNR	protein_coding	78.7304	-2.56127	0.652859	-3.92315	8.73975e-05	0.000275362	Down Regulated in MdU1_PMA
ENSG00000102230	PCYT1B	protein_coding	176.034	-2.5597	0.31903	-8.02338	1.02871e-15	7.71962e-15	Down Regulated in MdU1_PMA
ENSG00000062370	ZNF112	protein_coding	0.471502	-2.55815	4.25021	-0.601888	0.547249	0.768022	Non Significant
ENSG00000119125	GDA	protein_coding	0.503934	-2.55777	3.10914	-0.822663	0.4107	0.618139	Non Significant
ENSG00000138346	DNA2	protein_coding	631.884	-2.55639	0.169422	-15.089	1.91464e-51	5.41272e-50	Down Regulated in MdU1_PMA
ENSG00000097096	SYDE2	protein_coding	56.6748	-2.55378	0.284027	-8.99133	2.4425e-19	2.25204e-18	Down Regulated in MdU1_PMA
ENSG00000183426	NPIPA1	protein_coding	629.9	-2.55339	0.326951	-7.80971	5.73204e-15	4.13127e-14	Down Regulated in MdU1_PMA
ENSG00000069011	PITX1	protein_coding	58.989	-2.55175	0.291716	-8.74739	2.18352e-18	1.91322e-17	Down Regulated in MdU1_PMA
ENSG00000171097	KYAT1	protein_coding	225.4	-2.55075	0.197233	-12.9327	2.94409e-38	5.56464e-37	Down Regulated in MdU1_PMA
ENSG00000030419	IKZF2	protein_coding	6.48387	-2.54854	1.5373	-1.6578	0.0973582	0.18218	Non Significant
ENSG00000163909	HEYL	protein_coding	5.14607	-2.54688	1.34528	-1.8932	0.0583311	0.115733	Non Significant
ENSG00000165197	VEGFD	protein_coding	2.14141	-2.54661	1.10199	-2.31091	0.020838	0.0456427	Down Regulated in MdU1_PMA
ENSG00000156466	GDF6	protein_coding	0.808129	-2.54589	3.68731	-0.690446	0.489914	0.707484	Non Significant
ENSG00000188107	EYS	protein_coding	2.99176	-2.54506	1.72588	-1.47465	0.140307	0.251085	Non Significant
ENSG00000113389	NPR3	protein_coding	9.71092	-2.54218	0.813764	-3.12398	0.00178423	0.00469274	Down Regulated in MdU1_PMA
ENSG00000104147	OIP5	protein_coding	230.617	-2.54022	0.288422	-8.8073	1.28197e-18	1.13981e-17	Down Regulated in MdU1_PMA
ENSG00000156802	ATAD2	protein_coding	3273.16	-2.53952	0.133255	-19.0577	5.67432e-81	3.69695e-79	Down Regulated in MdU1_PMA
ENSG00000153162	BMP6	protein_coding	1.74439	-2.53679	1.40686	-1.80315	0.0713645	0.138519	Non Significant
ENSG00000134684	YARS1	protein_coding	8860.08	-2.53669	0.0931883	-27.2212	3.64892e-163	1.3807e-160	Down Regulated in MdU1_PMA
ENSG00000103995	CEP152	protein_coding	1360.16	-2.53615	0.165143	-15.3573	3.16382e-53	9.47508e-52	Down Regulated in MdU1_PMA
ENSG00000213694	S1PR3	protein_coding	506.732	-2.536	0.309682	-8.18906	2.63284e-16	2.05489e-15	Down Regulated in MdU1_PMA
ENSG00000112414	ADGRG6	protein_coding	1.71291	-2.52889	2.5679	-0.984807	0.324719	0.510807	Non Significant
ENSG00000129480	DTD2	protein_coding	181.649	-2.52576	0.21789	-11.5919	4.52711e-31	6.74813e-30	Down Regulated in MdU1_PMA
ENSG00000065057	NTHL1	protein_coding	250.737	-2.52313	0.306458	-8.23319	1.82296e-16	1.43589e-15	Down Regulated in MdU1_PMA
ENSG00000140092	FBLN5	protein_coding	1.73091	-2.52215	2.63586	-0.956862	0.338637	0.528733	Non Significant
ENSG00000127377	CRYGN	protein_coding	0.735244	-2.5216	2.77955	-0.907198	0.364302	0.561851	Non Significant
ENSG00000065320	NTN1	protein_coding	22.3576	-2.52083	0.426706	-5.90765	3.47017e-09	1.66942e-08	Down Regulated in MdU1_PMA
ENSG00000170703	TTLL6	protein_coding	9.15042	-2.5205	1.24757	-2.02032	0.0433501	0.0886558	Non Significant
ENSG00000173890	GPR160	protein_coding	371.435	-2.51578	0.237625	-10.5872	3.41644e-26	4.22779e-25	Down Regulated in MdU1_PMA
ENSG00000133740	E2F5	protein_coding	200.612	-2.51577	0.221292	-11.3685	5.99929e-30	8.57863e-29	Down Regulated in MdU1_PMA
ENSG00000164690	SHH	protein_coding	81.2457	-2.51537	0.241677	-10.408	2.28067e-25	2.73792e-24	Down Regulated in MdU1_PMA
ENSG00000219435	CATSPERZ	protein_coding	1.33628	-2.51384	2.05562	-1.22291	0.221364	0.370497	Non Significant
ENSG00000288564	ENSG00000288564	protein_coding	1.3871	-2.51215	2.3362	-1.07531	0.282234	0.454252	Non Significant
ENSG00000205899	BHLHA9	protein_coding	0.367958	-2.51086	4.25608	-0.589948	0.555226	0.775786	Non Significant
ENSG00000273213	H3-7	protein_coding	9.75187	-2.51085	0.970093	-2.58825	0.00964637	0.0226062	Down Regulated in MdU1_PMA
ENSG00000128973	CLN6	protein_coding	640.44	-2.51032	0.176926	-14.1885	1.07884e-45	2.5824e-44	Down Regulated in MdU1_PMA
ENSG00000184357	H1-5	protein_coding	0.487089	-2.50809	3.16108	-0.793427	0.427529	0.637615	Non Significant
ENSG00000173040	EVC2	protein_coding	0.833298	-2.50721	3.23381	-0.775311	0.438156	0.649918	Non Significant
ENSG00000167642	SPINT2	protein_coding	9.12733	-2.5027	0.942327	-2.65587	0.00791038	0.0187501	Down Regulated in MdU1_PMA
ENSG00000100814	CCNB1IP1	protein_coding	2144.78	-2.50235	0.169937	-14.7251	4.44575e-49	1.17258e-47	Down Regulated in MdU1_PMA
ENSG00000158402	CDC25C	protein_coding	158.768	-2.50104	0.210316	-11.8918	1.30488e-32	2.02963e-31	Down Regulated in MdU1_PMA
ENSG00000196296	ATP2A1	protein_coding	51.0936	-2.5003	0.455553	-5.48849	4.05392e-08	1.78485e-07	Down Regulated in MdU1_PMA
ENSG00000204669	C9orf57	protein_coding	0.70232	-2.50025	3.47126	-0.720272	0.471357	0.687606	Non Significant
ENSG00000153933	DGKE	protein_coding	967.708	-2.49902	0.20199	-12.372	3.70434e-35	6.26712e-34	Down Regulated in MdU1_PMA
ENSG00000256660	CLEC12B	protein_coding	350.456	-2.4979	0.287813	-8.67888	3.99681e-18	3.42216e-17	Down Regulated in MdU1_PMA
ENSG00000110077	MS4A6A	protein_coding	9.06874	-2.4971	0.722359	-3.45687	0.000546491	0.00155792	Down Regulated in MdU1_PMA
ENSG00000115841	RMDN2	protein_coding	3.12724	-2.49527	1.26371	-1.97455	0.0483189	0.0977206	Non Significant
ENSG00000288637	ENSG00000288637	protein_coding	1.7357	-2.49477	1.71201	-1.45722	0.145057	0.258456	Non Significant
ENSG00000111885	MAN1A1	protein_coding	294.139	-2.49049	1.02948	-2.41917	0.015556	0.0349846	Down Regulated in MdU1_PMA
ENSG00000178026	LRRC75B	protein_coding	1.87363	-2.49035	1.43996	-1.72946	0.0837273	0.159665	Non Significant
ENSG00000173285	OR10K1	protein_coding	1.9225	-2.49026	3.37442	-0.737984	0.460524	0.675509	Non Significant
ENSG00000269113	TRABD2B	protein_coding	4.44254	-2.48872	1.91658	-1.29852	0.194108	0.331966	Non Significant
ENSG00000011465	DCN	protein_coding	1.05267	-2.48701	4.04109	-0.615431	0.53827	0.758857	Non Significant
ENSG00000178821	TMEM52	protein_coding	2.7035	-2.48675	0.959321	-2.5922	0.00953653	0.0223621	Down Regulated in MdU1_PMA
ENSG00000011332	DPF1	protein_coding	57.1525	-2.48655	0.302574	-8.218	2.0692e-16	1.62529e-15	Down Regulated in MdU1_PMA
ENSG00000163888	CAMK2N2	protein_coding	26.1113	-2.48634	0.381264	-6.5213	6.97003e-11	3.82865e-10	Down Regulated in MdU1_PMA
ENSG00000185250	PPIL6	protein_coding	33.0992	-2.48588	0.503061	-4.94152	7.75178e-07	3.04136e-06	Down Regulated in MdU1_PMA
ENSG00000168646	AXIN2	protein_coding	35.8616	-2.48583	0.331608	-7.49629	6.56511e-14	4.42684e-13	Down Regulated in MdU1_PMA
ENSG00000120669	SOHLH2	protein_coding	180.01	-2.48466	0.201615	-12.3238	6.74193e-35	1.12801e-33	Down Regulated in MdU1_PMA
ENSG00000175322	ZNF519	protein_coding	462.773	-2.48453	0.21722	-11.4378	2.70538e-30	3.9227e-29	Down Regulated in MdU1_PMA
ENSG00000065618	COL17A1	protein_coding	2.76862	-2.48426	1.70254	-1.45915	0.144525	0.257672	Non Significant
ENSG00000156564	LRFN2	protein_coding	17.5964	-2.48358	1.18849	-2.08969	0.0366456	0.0761795	Non Significant
ENSG00000031691	CENPQ	protein_coding	408.258	-2.48323	0.165334	-15.0195	5.47451e-51	1.52357e-49	Down Regulated in MdU1_PMA
ENSG00000165259	HDX	protein_coding	2.14976	-2.48311	2.44624	-1.01507	0.310071	0.492093	Non Significant
ENSG00000177570	SAMD12	protein_coding	2.13605	-2.48284	1.45771	-1.70325	0.0885206	0.167781	Non Significant
ENSG00000179869	ABCA13	protein_coding	36.1935	-2.48246	0.563829	-4.40286	1.06831e-05	3.7536e-05	Down Regulated in MdU1_PMA
ENSG00000151917	BEND6	protein_coding	20.2925	-2.48178	0.492182	-5.04241	4.59699e-07	1.84367e-06	Down Regulated in MdU1_PMA
ENSG00000255073	ZFP91-CNTF	protein_coding	1.00478	-2.48089	3.97363	-0.624339	0.532405	0.752341	Non Significant
ENSG00000187553	CYP26C1	protein_coding	1.62635	-2.48086	1.77113	-1.40073	0.161296	0.283311	Non Significant
ENSG00000180694	TMEM64	protein_coding	324.375	-2.47918	0.166609	-14.8803	4.42798e-50	1.20338e-48	Down Regulated in MdU1_PMA
ENSG00000100167	SEPTIN3	protein_coding	409.435	-2.47683	0.169386	-14.6224	2.02197e-48	5.24858e-47	Down Regulated in MdU1_PMA
ENSG00000163507	CIP2A	protein_coding	890.675	-2.47636	0.134834	-18.366	2.46003e-75	1.39091e-73	Down Regulated in MdU1_PMA
ENSG00000152672	CLEC4F	protein_coding	1.01266	-2.47476	1.76144	-1.40496	0.160032	0.281393	Non Significant
ENSG00000117479	SLC19A2	protein_coding	169.744	-2.47195	0.158721	-15.5742	1.0903e-54	3.44345e-53	Down Regulated in MdU1_PMA
ENSG00000171747	LGALS4	protein_coding	3.2535	-2.47087	1.07007	-2.30907	0.0209399	0.0458556	Down Regulated in MdU1_PMA
ENSG00000176749	CDK5R1	protein_coding	228.247	-2.47078	0.171415	-14.414	4.22302e-47	1.06256e-45	Down Regulated in MdU1_PMA
ENSG00000283473	FAM240A	protein_coding	0.267189	-2.46985	4.25455	-0.58052	0.561564	0.7817	Non Significant
ENSG00000145945	FAM50B	protein_coding	2.65252	-2.46596	1.49077	-1.65415	0.0980968	0.183457	Non Significant
ENSG00000158481	CD1C	protein_coding	4.52666	-2.4654	1.3135	-1.87697	0.0605225	0.119683	Non Significant
ENSG00000139915	MDGA2	protein_coding	0.828021	-2.46304	3.13276	-0.78622	0.431739	0.642627	Non Significant
ENSG00000115556	PLCD4	protein_coding	18.415	-2.46285	0.704986	-3.49348	0.000476772	0.00136968	Down Regulated in MdU1_PMA
ENSG00000005981	ASB4	protein_coding	0.932871	-2.46077	4.19325	-0.586841	0.557311	0.778202	Non Significant
ENSG00000204899	MZT1	protein_coding	2357.86	-2.46012	0.125398	-19.6185	1.07456e-85	7.74472e-84	Down Regulated in MdU1_PMA
ENSG00000169851	PCDH7	protein_coding	6.9889	-2.45953	1.1246	-2.18702	0.0287408	0.0611554	Non Significant
ENSG00000166147	FBN1	protein_coding	240.265	-2.45831	0.367313	-6.6927	2.19084e-11	1.25347e-10	Down Regulated in MdU1_PMA
ENSG00000061492	WNT8A	protein_coding	1.43216	-2.45468	1.75009	-1.4026	0.160735	0.282453	Non Significant
ENSG00000129355	CDKN2D	protein_coding	408.472	-2.45265	0.196276	-12.4959	7.85816e-36	1.37072e-34	Down Regulated in MdU1_PMA
ENSG00000121864	ZNF639	protein_coding	657.108	-2.45148	0.103728	-23.6338	1.73214e-123	2.77087e-121	Down Regulated in MdU1_PMA
ENSG00000164649	CDCA7L	protein_coding	6104.58	-2.45129	0.0942192	-26.0168	3.19325e-149	9.37767e-147	Down Regulated in MdU1_PMA
ENSG00000104044	OCA2	protein_coding	1.05544	-2.45047	4.272	-0.573612	0.56623	0.786471	Non Significant
ENSG00000267710	EDDM13	protein_coding	36.7639	-2.4504	0.927835	-2.64098	0.00826659	0.0195544	Down Regulated in MdU1_PMA
ENSG00000109685	NSD2	protein_coding	6270.43	-2.45037	0.13899	-17.6298	1.45368e-69	6.81012e-68	Down Regulated in MdU1_PMA
ENSG00000256870	SLC5A8	protein_coding	0.615638	-2.44574	4.26669	-0.573217	0.566498	0.786676	Non Significant
ENSG00000157693	TMEM268	protein_coding	477.497	-2.44394	0.195476	-12.5025	7.23314e-36	1.26394e-34	Down Regulated in MdU1_PMA
ENSG00000124107	SLPI	protein_coding	29.0855	-2.44342	0.374604	-6.52267	6.90657e-11	3.79803e-10	Down Regulated in MdU1_PMA
ENSG00000134897	BIVM	protein_coding	2.82428	-2.44278	1.77251	-1.37815	0.168158	0.293661	Non Significant
ENSG00000184613	NELL2	protein_coding	2.43382	-2.44273	4.26583	-0.572627	0.566897	0.787119	Non Significant
ENSG00000197275	RAD54B	protein_coding	330.751	-2.4425	0.208937	-11.6901	1.43222e-31	2.17274e-30	Down Regulated in MdU1_PMA
ENSG00000086548	CEACAM6	protein_coding	51.1711	-2.44201	0.994555	-2.45538	0.0140735	0.0319058	Down Regulated in MdU1_PMA
ENSG00000162510	MATN1	protein_coding	1.87041	-2.44193	1.38549	-1.76251	0.0779833	0.149873	Non Significant
ENSG00000110318	CEP126	protein_coding	0.871241	-2.44151	2.72737	-0.895187	0.370687	0.569647	Non Significant
ENSG00000168843	FSTL5	protein_coding	2.86396	-2.43724	1.15935	-2.10225	0.0355313	0.074148	Non Significant
ENSG00000164651	SP8	protein_coding	1.28739	-2.43433	2.84345	-0.856121	0.391931	0.595815	Non Significant
ENSG00000184992	BRI3BP	protein_coding	1431.9	-2.43252	0.142027	-17.1272	9.30926e-66	3.90552e-64	Down Regulated in MdU1_PMA
ENSG00000070748	CHAT	protein_coding	37.1919	-2.43113	0.609716	-3.98732	6.68251e-05	0.000213623	Down Regulated in MdU1_PMA
ENSG00000130876	SLC7A10	protein_coding	0.977675	-2.43049	1.83194	-1.32673	0.184597	0.318023	Non Significant
ENSG00000134198	TSPAN2	protein_coding	232.897	-2.42853	0.203913	-11.9097	1.05403e-32	1.64597e-31	Down Regulated in MdU1_PMA
ENSG00000172680	MOS	protein_coding	0.436358	-2.42849	4.26457	-0.569456	0.569046	0.78922	Non Significant
ENSG00000068831	RASGRP2	protein_coding	776.433	-2.42843	0.158873	-15.2854	9.56661e-53	2.81364e-51	Down Regulated in MdU1_PMA
ENSG00000123179	EBPL	protein_coding	1100.08	-2.42833	0.176338	-13.7709	3.81314e-43	8.54525e-42	Down Regulated in MdU1_PMA
ENSG00000187840	EIF4EBP1	protein_coding	2568.99	-2.4283	0.199893	-12.148	5.87853e-34	9.48859e-33	Down Regulated in MdU1_PMA
ENSG00000104413	ESRP1	protein_coding	1.77331	-2.42719	3.12349	-0.777074	0.437115	0.648961	Non Significant
ENSG00000123473	STIL	protein_coding	837.387	-2.42717	0.174372	-13.9195	4.82153e-44	1.10828e-42	Down Regulated in MdU1_PMA
ENSG00000101306	MYLK2	protein_coding	18.5848	-2.42705	0.453162	-5.35581	8.51728e-08	3.6408e-07	Down Regulated in MdU1_PMA
ENSG00000144395	CCDC150	protein_coding	220.061	-2.42642	0.230202	-10.5404	5.6255e-26	6.90502e-25	Down Regulated in MdU1_PMA
ENSG00000196550	FAM72A	protein_coding	339.932	-2.42576	0.195184	-12.4281	1.83999e-35	3.16188e-34	Down Regulated in MdU1_PMA
ENSG00000148704	VAX1	protein_coding	1.23494	-2.42522	3.84769	-0.630306	0.528494	0.748266	Non Significant
ENSG00000055118	KCNH2	protein_coding	9.46537	-2.424	1.22346	-1.98126	0.047562	0.0963085	Non Significant
ENSG00000136542	GALNT5	protein_coding	2.48226	-2.42302	1.51085	-1.60374	0.10877	0.201011	Non Significant
ENSG00000229972	IQCF3	protein_coding	6.29132	-2.42225	1.11485	-2.17272	0.0298015	0.0632756	Non Significant
ENSG00000116985	BMP8B	protein_coding	239.732	-2.4218	0.130665	-18.5345	1.08786e-76	6.37047e-75	Down Regulated in MdU1_PMA
ENSG00000131668	BARX1	protein_coding	143.667	-2.42094	0.281252	-8.60772	7.45252e-18	6.2826e-17	Down Regulated in MdU1_PMA
ENSG00000134775	FHOD3	protein_coding	6.61417	-2.42053	0.951371	-2.54426	0.010951	0.0253882	Down Regulated in MdU1_PMA
ENSG00000165304	MELK	protein_coding	691.139	-2.41967	0.136057	-17.7843	9.35447e-71	4.63623e-69	Down Regulated in MdU1_PMA
ENSG00000170430	MGMT	protein_coding	140.836	-2.41782	1.0171	-2.37716	0.0174464	0.0387969	Down Regulated in MdU1_PMA
ENSG00000153132	CLGN	protein_coding	62.3701	-2.41708	0.323081	-7.48135	7.35612e-14	4.94496e-13	Down Regulated in MdU1_PMA
ENSG00000168264	IRF2BP2	protein_coding	5493.63	-2.41654	0.18136	-13.3245	1.66681e-40	3.41984e-39	Down Regulated in MdU1_PMA
ENSG00000188848	BEND4	protein_coding	4.19518	-2.41638	1.33608	-1.80855	0.0705205	0.137219	Non Significant
ENSG00000114374	USP9Y	protein_coding	1.47018	-2.41495	3.23234	-0.747122	0.45499	0.669387	Non Significant
ENSG00000138376	BARD1	protein_coding	474.3	-2.41383	0.198263	-12.1749	4.23032e-34	6.85633e-33	Down Regulated in MdU1_PMA
ENSG00000118849	RARRES1	protein_coding	1.06164	-2.4126	1.62128	-1.48808	0.13673	0.245734	Non Significant
ENSG00000123219	CENPK	protein_coding	580.245	-2.41164	0.180368	-13.3707	8.9744e-41	1.85874e-39	Down Regulated in MdU1_PMA
ENSG00000213347	MXD3	protein_coding	425.91	-2.41105	0.218711	-11.0239	2.92956e-28	3.94808e-27	Down Regulated in MdU1_PMA
ENSG00000130958	SLC35D2	protein_coding	2.2863	-2.40937	1.25423	-1.921	0.0547322	0.109353	Non Significant
ENSG00000142583	SLC2A5	protein_coding	671.282	-2.40927	0.198272	-12.1513	5.64285e-34	9.12315e-33	Down Regulated in MdU1_PMA
ENSG00000249222	ATP5MGL	protein_coding	0.459747	-2.40926	2.85252	-0.844609	0.398329	0.603072	Non Significant
ENSG00000112559	MDFI	protein_coding	72.9112	-2.40876	0.870912	-2.76578	0.0056786	0.0137822	Down Regulated in MdU1_PMA
ENSG00000163914	RHO	protein_coding	1.31398	-2.40815	1.97937	-1.21662	0.223748	0.373693	Non Significant
ENSG00000160318	CLDND2	protein_coding	5.82763	-2.40684	0.832745	-2.89024	0.00384945	0.00959244	Down Regulated in MdU1_PMA
ENSG00000086205	FOLH1	protein_coding	0.74006	-2.40652	4.27529	-0.56289	0.57351	0.793501	Non Significant
ENSG00000282419	TEX13D	protein_coding	0.829754	-2.40625	2.93372	-0.820202	0.412101	0.619963	Non Significant
ENSG00000140254	DUOXA1	protein_coding	2.5768	-2.40492	1.52469	-1.57732	0.114722	0.210586	Non Significant
ENSG00000145088	EAF2	protein_coding	811.816	-2.40333	0.15621	-15.3853	2.05534e-53	6.19307e-52	Down Regulated in MdU1_PMA
ENSG00000183150	GPR19	protein_coding	32.5112	-2.40158	0.354935	-6.76627	1.32147e-11	7.69269e-11	Down Regulated in MdU1_PMA
ENSG00000171793	CTPS1	protein_coding	1017.89	-2.39994	0.146409	-16.3921	2.17878e-60	7.96835e-59	Down Regulated in MdU1_PMA
ENSG00000179914	ITLN1	protein_coding	0.681273	-2.39966	1.69454	-1.41612	0.156741	0.276472	Non Significant
ENSG00000184445	KNTC1	protein_coding	2098.86	-2.39757	0.181596	-13.2027	8.46289e-40	1.68538e-38	Down Regulated in MdU1_PMA
ENSG00000271824	SMIM32	protein_coding	1.17427	-2.39656	2.1744	-1.10217	0.270388	0.438523	Non Significant
ENSG00000142627	EPHA2	protein_coding	1.504	-2.39572	3.61594	-0.662544	0.507622	0.726927	Non Significant
ENSG00000050030	NEXMIF	protein_coding	1.5616	-2.39402	2.47957	-0.965499	0.334295	0.523277	Non Significant
ENSG00000067113	PLPP1	protein_coding	67.8471	-2.39288	0.320073	-7.47605	7.6588e-14	5.13265e-13	Down Regulated in MdU1_PMA
ENSG00000113272	THG1L	protein_coding	371.472	-2.3899	0.137703	-17.3555	1.79307e-67	7.92818e-66	Down Regulated in MdU1_PMA
ENSG00000111291	GPRC5D	protein_coding	0.695591	-2.38762	2.32731	-1.02591	0.304932	0.484757	Non Significant
ENSG00000099617	EFNA2	protein_coding	1.22545	-2.38761	2.02085	-1.18149	0.237409	0.393469	Non Significant
ENSG00000101670	LIPG	protein_coding	2.94322	-2.3867	2.22857	-1.07096	0.284189	0.456913	Non Significant
ENSG00000141401	IMPA2	protein_coding	950.795	-2.38655	0.208471	-11.4479	2.40999e-30	3.50214e-29	Down Regulated in MdU1_PMA
ENSG00000144619	CNTN4	protein_coding	2.0126	-2.38571	2.91199	-0.819273	0.412631	0.62057	Non Significant
ENSG00000154930	ACSS1	protein_coding	2497.31	-2.38339	0.12019	-19.8302	1.63258e-87	1.21676e-85	Down Regulated in MdU1_PMA
ENSG00000109832	DDX25	protein_coding	3.05707	-2.38166	1.38587	-1.71853	0.0857002	0.162874	Non Significant
ENSG00000177455	CD19	protein_coding	33.0016	-2.38117	0.527019	-4.51819	6.23711e-06	2.24929e-05	Down Regulated in MdU1_PMA
ENSG00000142700	DMRTA2	protein_coding	2.84705	-2.38065	1.43282	-1.66151	0.0966108	0.18097	Non Significant
ENSG00000222028	PSMB11	protein_coding	0.583462	-2.37946	4.0769	-0.583646	0.559458	0.779707	Non Significant
ENSG00000084110	HAL	protein_coding	151.392	-2.37842	0.391396	-6.07676	1.22637e-09	6.08425e-09	Down Regulated in MdU1_PMA
ENSG00000172789	HOXC5	protein_coding	11.1635	-2.37809	1.06946	-2.22363	0.0261735	0.0561297	Non Significant
ENSG00000162426	SLC45A1	protein_coding	1.63414	-2.37758	3.58788	-0.662672	0.507541	0.726877	Non Significant
ENSG00000267909	CCDC177	protein_coding	1.92458	-2.37738	1.81048	-1.31312	0.189144	0.32469	Non Significant
ENSG00000283886	ENSG00000283886	protein_coding	1.24309	-2.37506	2.97821	-0.797479	0.425173	0.635064	Non Significant
ENSG00000100473	COCH	protein_coding	0.679647	-2.37495	2.95442	-0.803862	0.421477	0.630836	Non Significant
ENSG00000211695	TRGV9	TR_V_gene	33.5869	-2.37376	0.419648	-5.65656	1.5444e-08	7.05265e-08	Down Regulated in MdU1_PMA
ENSG00000160949	TONSL	protein_coding	673.938	-2.37376	0.160492	-14.7905	1.68626e-49	4.51413e-48	Down Regulated in MdU1_PMA
ENSG00000144681	STAC	protein_coding	168.161	-2.37302	0.207688	-11.4259	3.10497e-30	4.48556e-29	Down Regulated in MdU1_PMA
ENSG00000110063	DCPS	protein_coding	803.694	-2.37218	0.220337	-10.7662	4.9726e-27	6.4116e-26	Down Regulated in MdU1_PMA
ENSG00000124232	RBPJL	protein_coding	2.3143	-2.37153	1.09853	-2.15882	0.0308642	0.0653133	Non Significant
ENSG00000213215	OR2F1	protein_coding	0.417378	-2.37119	4.25746	-0.556949	0.577563	0.797762	Non Significant
ENSG00000100297	MCM5	protein_coding	2817.89	-2.36882	0.152839	-15.4988	3.53558e-54	1.0938e-52	Down Regulated in MdU1_PMA
ENSG00000126790	L3HYPDH	protein_coding	177.157	-2.36871	0.272555	-8.69074	3.60089e-18	3.09259e-17	Down Regulated in MdU1_PMA
ENSG00000189420	ZFP92	protein_coding	260.519	-2.36749	0.197882	-11.9641	5.47656e-33	8.5862e-32	Down Regulated in MdU1_PMA
ENSG00000168955	TM4SF20	protein_coding	0.858329	-2.36744	1.74251	-1.35864	0.17426	0.302891	Non Significant
ENSG00000150051	MKX	protein_coding	3.66982	-2.36701	1.42841	-1.6571	0.0975	0.182393	Non Significant
ENSG00000204228	HSD17B8	protein_coding	1.72173	-2.36525	1.50224	-1.57448	0.115377	0.21163	Non Significant
ENSG00000163623	NKX6-1	protein_coding	0.566334	-2.36513	4.26629	-0.554377	0.579321	0.799006	Non Significant
ENSG00000197603	CPLANE1	protein_coding	22.6617	-2.3651	1.11185	-2.12718	0.0334048	0.070214	Non Significant
ENSG00000146263	MMS22L	protein_coding	875.085	-2.36472	0.208974	-11.3158	1.09564e-29	1.55204e-28	Down Regulated in MdU1_PMA
ENSG00000167618	LAIR2	protein_coding	1.85524	-2.3616	1.35612	-1.74144	0.0816066	0.15615	Non Significant
ENSG00000144381	HSPD1	protein_coding	9625.89	-2.36082	0.132934	-17.7593	1.45919e-70	7.17775e-69	Down Regulated in MdU1_PMA
ENSG00000198300	PEG3	protein_coding	1.59891	-2.36001	2.14165	-1.10196	0.270478	0.438633	Non Significant
ENSG00000181449	SOX2	protein_coding	1.11366	-2.35991	2.71965	-0.867726	0.385544	0.587877	Non Significant
ENSG00000181409	AATK	protein_coding	37.0766	-2.35977	0.729956	-3.23275	0.00122604	0.00329957	Down Regulated in MdU1_PMA
ENSG00000137404	NRM	protein_coding	558.583	-2.35839	0.174516	-13.5139	1.29494e-41	2.75451e-40	Down Regulated in MdU1_PMA
ENSG00000188060	RAB42	protein_coding	18.6121	-2.35711	0.79852	-2.95185	0.00315873	0.00797355	Down Regulated in MdU1_PMA
ENSG00000149150	SLC43A1	protein_coding	1290.34	-2.3565	0.190361	-12.3791	3.39199e-35	5.75352e-34	Down Regulated in MdU1_PMA
ENSG00000085265	FCN1	protein_coding	31.096	-2.35602	0.330552	-7.12752	1.02196e-12	6.38556e-12	Down Regulated in MdU1_PMA
ENSG00000138182	KIF20B	protein_coding	1468.41	-2.35451	0.168132	-14.004	1.47423e-44	3.42467e-43	Down Regulated in MdU1_PMA
ENSG00000124802	EEF1E1	protein_coding	611.83	-2.35431	0.173576	-13.5636	6.58062e-42	1.42286e-40	Down Regulated in MdU1_PMA
ENSG00000004455	AK2	protein_coding	19025.5	-2.35368	0.132888	-17.7117	3.40714e-70	1.64715e-68	Down Regulated in MdU1_PMA
ENSG00000141040	ZNF287	protein_coding	2.94726	-2.3531	1.3964	-1.68511	0.0919669	0.173427	Non Significant
ENSG00000175305	CCNE2	protein_coding	239.559	-2.35255	0.226143	-10.4029	2.40389e-25	2.88233e-24	Down Regulated in MdU1_PMA
ENSG00000163535	SGO2	protein_coding	939.817	-2.35231	0.125518	-18.7409	2.29894e-78	1.40043e-76	Down Regulated in MdU1_PMA
ENSG00000188211	NCR3LG1	protein_coding	587.48	-2.35056	0.327516	-7.17694	7.12885e-13	4.51456e-12	Down Regulated in MdU1_PMA
ENSG00000189143	CLDN4	protein_coding	39.2821	-2.34988	0.357394	-6.57504	4.86408e-11	2.70126e-10	Down Regulated in MdU1_PMA
ENSG00000110987	BCL7A	protein_coding	387.991	-2.34751	0.218107	-10.7631	5.1405e-27	6.61508e-26	Down Regulated in MdU1_PMA
ENSG00000075702	WDR62	protein_coding	747.435	-2.34698	0.207738	-11.2978	1.34616e-29	1.90007e-28	Down Regulated in MdU1_PMA
ENSG00000007402	CACNA2D2	protein_coding	130.74	-2.34697	0.4013	-5.84842	4.96266e-09	2.362e-08	Down Regulated in MdU1_PMA
ENSG00000180089	TMEM86B	protein_coding	125.403	-2.34674	0.259015	-9.06025	1.30154e-19	1.21428e-18	Down Regulated in MdU1_PMA
ENSG00000167281	RBFOX3	protein_coding	7.67131	-2.34514	0.739515	-3.17119	0.00151818	0.00402963	Down Regulated in MdU1_PMA
ENSG00000171219	CDC42BPG	protein_coding	10.7826	-2.34466	0.73615	-3.18503	0.00144737	0.0038526	Down Regulated in MdU1_PMA
ENSG00000113430	IRX4	protein_coding	2.89154	-2.34461	1.36185	-1.72164	0.0851348	0.161925	Non Significant
ENSG00000151835	SACS	protein_coding	1702.17	-2.3444	0.168973	-13.8744	9.05362e-44	2.06418e-42	Down Regulated in MdU1_PMA
ENSG00000198807	PAX9	protein_coding	7.69748	-2.34339	1.22636	-1.91084	0.0560247	0.111652	Non Significant
ENSG00000166342	NETO1	protein_coding	5.83242	-2.34333	4.22714	-0.554354	0.579336	0.799006	Non Significant
ENSG00000065361	ERBB3	protein_coding	7.45927	-2.34231	0.899936	-2.60276	0.00924777	0.0217265	Down Regulated in MdU1_PMA
ENSG00000249115	HAUS5	protein_coding	612.558	-2.33968	0.1842	-12.7018	5.77798e-37	1.04878e-35	Down Regulated in MdU1_PMA
ENSG00000243130	PSG11	protein_coding	0.440668	-2.33885	4.26396	-0.548515	0.583338	0.802585	Non Significant
ENSG00000288611	NPBWR1	protein_coding	1.55446	-2.33841	2.64977	-0.882494	0.37751	0.578225	Non Significant
ENSG00000156453	PCDH1	protein_coding	1.04282	-2.33693	4.08594	-0.571944	0.56736	0.787596	Non Significant
ENSG00000131152	ENSG00000131152	protein_coding	12.5216	-2.3335	0.858469	-2.71822	0.00656351	0.0157723	Down Regulated in MdU1_PMA
ENSG00000009694	TENM1	protein_coding	2.37829	-2.33246	1.30195	-1.79152	0.0732105	0.141554	Non Significant
ENSG00000197566	ZNF624	protein_coding	1.04817	-2.33246	4.26973	-0.546278	0.584875	0.80451	Non Significant
ENSG00000142207	URB1	protein_coding	759.481	-2.3313	0.172221	-13.5367	9.50028e-42	2.04069e-40	Down Regulated in MdU1_PMA
ENSG00000144488	ESPNL	protein_coding	6.3967	-2.32997	0.725976	-3.20944	0.00132994	0.00355832	Down Regulated in MdU1_PMA
ENSG00000197472	ZNF695	protein_coding	0.632174	-2.32888	2.38484	-0.976535	0.328799	0.516111	Non Significant
ENSG00000183476	SH2D7	protein_coding	1.2607	-2.32861	1.64216	-1.41802	0.156185	0.275713	Non Significant
ENSG00000177084	POLE	protein_coding	2288.27	-2.3284	0.148974	-15.6296	4.57989e-55	1.4558e-53	Down Regulated in MdU1_PMA
ENSG00000168913	ENHO	protein_coding	1.40214	-2.32783	1.80252	-1.29143	0.196555	0.335568	Non Significant
ENSG00000164855	TMEM184A	protein_coding	15.5733	-2.32733	0.773993	-3.00691	0.00263916	0.0067483	Down Regulated in MdU1_PMA
ENSG00000146373	RNF217	protein_coding	2.04131	-2.3273	2.85675	-0.814669	0.415262	0.623527	Non Significant
ENSG00000182389	CACNB4	protein_coding	416.916	-2.3272	0.244085	-9.53438	1.50789e-21	1.54046e-20	Down Regulated in MdU1_PMA
ENSG00000159556	ISL2	protein_coding	47.5123	-2.32682	1.04941	-2.21726	0.0266052	0.0569748	Non Significant
ENSG00000262481	TMEM256-PLSCR3	protein_coding	4.53579	-2.32481	1.16413	-1.99704	0.0458205	0.0930407	Non Significant
ENSG00000145975	FAM217A	protein_coding	0.738521	-2.32361	4.27386	-0.54368	0.586662	0.805974	Non Significant
ENSG00000111602	TIMELESS	protein_coding	1710.66	-2.32318	0.0680166	-34.1561	1.08445e-255	1.64135e-252	Down Regulated in MdU1_PMA
ENSG00000170927	PKHD1	protein_coding	1.05212	-2.32174	3.46244	-0.67055	0.502507	0.721282	Non Significant
ENSG00000177511	ST8SIA3	protein_coding	16.2256	-2.32021	0.871708	-2.66168	0.0077751	0.0184628	Down Regulated in MdU1_PMA
ENSG00000145864	GABRB2	protein_coding	3.3864	-2.32013	1.47148	-1.57674	0.114856	0.210773	Non Significant
ENSG00000163218	PGLYRP4	protein_coding	0.846149	-2.31884	2.41251	-0.961176	0.336464	0.525841	Non Significant
ENSG00000114631	PODXL2	protein_coding	801.397	-2.31873	0.207273	-11.1868	4.73016e-29	6.53586e-28	Down Regulated in MdU1_PMA
ENSG00000105467	SYNGR4	protein_coding	4.65522	-2.31725	0.756304	-3.06391	0.00218465	0.00566863	Down Regulated in MdU1_PMA
ENSG00000288520	ENSG00000288520	protein_coding	6.99213	-2.3152	4.14367	-0.558732	0.576345	0.796527	Non Significant
ENSG00000130635	COL5A1	protein_coding	5.04496	-2.31514	1.56033	-1.48375	0.137876	0.24759	Non Significant
ENSG00000034053	APBA2	protein_coding	187.154	-2.31442	0.323988	-7.14353	9.09629e-13	5.70722e-12	Down Regulated in MdU1_PMA
ENSG00000076356	PLXNA2	protein_coding	7.08279	-2.31425	0.895863	-2.58326	0.00978707	0.0229032	Down Regulated in MdU1_PMA
ENSG00000157214	STEAP2	protein_coding	1.23023	-2.31375	3.26563	-0.708516	0.478625	0.695013	Non Significant
ENSG00000136297	MMD2	protein_coding	0.714952	-2.31296	4.26933	-0.541762	0.587982	0.807506	Non Significant
ENSG00000080839	RBL1	protein_coding	669.384	-2.31244	0.175027	-13.2119	7.49392e-40	1.49848e-38	Down Regulated in MdU1_PMA
ENSG00000007314	SCN4A	protein_coding	4.70142	-2.3119	1.15197	-2.00691	0.0447587	0.0912142	Non Significant
ENSG00000073150	PANX2	protein_coding	3.36746	-2.31074	1.8807	-1.22866	0.2192	0.367356	Non Significant
ENSG00000136449	MYCBPAP	protein_coding	2.85298	-2.30987	1.69254	-1.36473	0.172337	0.299973	Non Significant
ENSG00000158691	ZSCAN12	protein_coding	26.8344	-2.30858	1.08341	-2.13085	0.0331015	0.0696583	Non Significant
ENSG00000278588	H2BC10	protein_coding	0.730976	-2.30783	4.0696	-0.56709	0.570653	0.790716	Non Significant
ENSG00000083807	SLC27A5	protein_coding	158.78	-2.30762	0.294165	-7.84463	4.34233e-15	3.15858e-14	Down Regulated in MdU1_PMA
ENSG00000102802	MEDAG	protein_coding	7.47466	-2.30699	1.1168	-2.06572	0.0388546	0.0803893	Non Significant
ENSG00000071282	LMCD1	protein_coding	33.8609	-2.3066	1.02818	-2.24339	0.0248719	0.0535718	Non Significant
ENSG00000261739	GOLGA8S	protein_coding	6.66312	-2.30621	0.999766	-2.30675	0.021069	0.0461076	Down Regulated in MdU1_PMA
ENSG00000164403	SHROOM1	protein_coding	2.53881	-2.30541	2.35567	-0.978661	0.327747	0.514665	Non Significant
ENSG00000110080	ST3GAL4	protein_coding	1120.02	-2.30438	0.138708	-16.6132	5.59603e-62	2.13386e-60	Down Regulated in MdU1_PMA
ENSG00000030304	MUSK	protein_coding	1.48298	-2.30371	3.61948	-0.636476	0.524466	0.743848	Non Significant
ENSG00000143375	CGN	protein_coding	35.3927	-2.30126	0.588171	-3.91257	9.13186e-05	0.000286935	Down Regulated in MdU1_PMA
ENSG00000197993	KEL	protein_coding	12.0259	-2.30094	0.733633	-3.13636	0.00171058	0.00450869	Down Regulated in MdU1_PMA
ENSG00000143179	UCK2	protein_coding	1360.89	-2.30035	0.16035	-14.3458	1.13116e-46	2.80218e-45	Down Regulated in MdU1_PMA
ENSG00000180198	RCC1	protein_coding	2726.57	-2.29927	0.120444	-19.0899	3.06169e-81	2.00806e-79	Down Regulated in MdU1_PMA
ENSG00000181218	H2AC25	protein_coding	99.355	-2.29867	0.347078	-6.62292	3.52163e-11	1.97581e-10	Down Regulated in MdU1_PMA
ENSG00000167772	ANGPTL4	protein_coding	1.43594	-2.29662	1.52775	-1.50327	0.13277	0.239493	Non Significant
ENSG00000197496	SLC2A10	protein_coding	0.935658	-2.29576	4.16469	-0.551243	0.581467	0.800738	Non Significant
ENSG00000166813	KIF7	protein_coding	4.33528	-2.29561	0.984432	-2.33191	0.0197054	0.0433744	Down Regulated in MdU1_PMA
ENSG00000204165	CXorf65	protein_coding	20.7704	-2.29529	1.04975	-2.18651	0.0287783	0.0612286	Non Significant
ENSG00000111907	TPD52L1	protein_coding	17.1671	-2.29424	0.589315	-3.89306	9.89883e-05	0.000309305	Down Regulated in MdU1_PMA
ENSG00000144821	MYH15	protein_coding	14.3641	-2.29334	0.877501	-2.61349	0.0089622	0.0210959	Down Regulated in MdU1_PMA
ENSG00000180616	SSTR2	protein_coding	13.6901	-2.29294	0.482641	-4.75083	2.02582e-06	7.6331e-06	Down Regulated in MdU1_PMA
ENSG00000186638	KIF24	protein_coding	259.282	-2.29164	0.170725	-13.423	4.43444e-41	9.27226e-40	Down Regulated in MdU1_PMA
ENSG00000136938	ANP32B	protein_coding	3688.9	-2.29159	0.185459	-12.3563	4.5044e-35	7.58157e-34	Down Regulated in MdU1_PMA
ENSG00000110900	TSPAN11	protein_coding	3.85943	-2.29074	1.14415	-2.00213	0.0452705	0.0920755	Non Significant
ENSG00000126215	XRCC3	protein_coding	415.058	-2.28857	0.174829	-13.0903	3.74167e-39	7.28202e-38	Down Regulated in MdU1_PMA
ENSG00000181619	GPR135	protein_coding	48.7611	-2.28846	0.327679	-6.98385	2.87202e-12	1.74845e-11	Down Regulated in MdU1_PMA
ENSG00000136750	GAD2	protein_coding	1.88858	-2.28765	2.59113	-0.882875	0.377304	0.577955	Non Significant
ENSG00000215906	LACTBL1	protein_coding	1.19469	-2.28701	3.49054	-0.655203	0.512337	0.731357	Non Significant
ENSG00000272647	ENSG00000272647	protein_coding	9.47251	-2.28654	0.819812	-2.7891	0.00528539	0.0128819	Down Regulated in MdU1_PMA
ENSG00000170085	SIMC1	protein_coding	93.4402	-2.28483	0.359162	-6.36156	1.99709e-10	1.05916e-09	Down Regulated in MdU1_PMA
ENSG00000157703	SVOPL	protein_coding	0.956145	-2.2845	3.60019	-0.63455	0.525722	0.745414	Non Significant
ENSG00000167965	MLST8	protein_coding	1747.51	-2.28326	0.200443	-11.3911	4.633e-30	6.66366e-29	Down Regulated in MdU1_PMA
ENSG00000185974	GRK1	protein_coding	2.33718	-2.28186	1.26021	-1.8107	0.0701867	0.136664	Non Significant
ENSG00000069018	TRPC7	protein_coding	1.91753	-2.28161	2.18056	-1.04634	0.295403	0.471897	Non Significant
ENSG00000144229	THSD7B	protein_coding	3.95552	-2.28116	1.81723	-1.25529	0.209372	0.354132	Non Significant
ENSG00000268799	H3Y2	protein_coding	0.36996	-2.28095	4.26794	-0.534439	0.593038	0.812703	Non Significant
ENSG00000116824	CD2	protein_coding	0.506278	-2.2808	3.60702	-0.632323	0.527176	0.746883	Non Significant
ENSG00000143125	PROK1	protein_coding	1.31116	-2.27942	1.42666	-1.59773	0.110104	0.203133	Non Significant
ENSG00000159399	HK2	protein_coding	3058.7	-2.27897	0.130884	-17.4121	6.6812e-68	2.97419e-66	Down Regulated in MdU1_PMA
ENSG00000253958	CLDN23	protein_coding	0.934779	-2.27814	4.22312	-0.539445	0.58958	0.809192	Non Significant
ENSG00000131686	CA6	protein_coding	1.50661	-2.27568	1.82919	-1.24409	0.213467	0.359801	Non Significant
ENSG00000116649	SRM	protein_coding	1282.29	-2.27435	0.163378	-13.9208	4.73719e-44	1.09016e-42	Down Regulated in MdU1_PMA
ENSG00000261115	TMEM178B	protein_coding	2.67442	-2.27434	1.37218	-1.65747	0.0974249	0.18227	Non Significant
ENSG00000128283	CDC42EP1	protein_coding	0.47434	-2.27405	4.27261	-0.532239	0.594561	0.814097	Non Significant
ENSG00000029993	HMGB3	protein_coding	703.376	-2.27325	0.180213	-12.6142	1.76359e-36	3.1403e-35	Down Regulated in MdU1_PMA
ENSG00000141447	OSBPL1A	protein_coding	546.141	-2.27163	0.179733	-12.639	1.28741e-36	2.29864e-35	Down Regulated in MdU1_PMA
ENSG00000213465	ARL2	protein_coding	607.038	-2.27157	0.212217	-10.704	9.74619e-27	1.2388e-25	Down Regulated in MdU1_PMA
ENSG00000010292	NCAPD2	protein_coding	4503.83	-2.26906	0.108202	-20.9706	1.21755e-97	1.084e-95	Down Regulated in MdU1_PMA
ENSG00000073598	FNDC8	protein_coding	1.29254	-2.26902	1.83832	-1.23429	0.217095	0.364405	Non Significant
ENSG00000138604	GLCE	protein_coding	120.779	-2.26754	1.04444	-2.17107	0.0299262	0.0635334	Non Significant
ENSG00000187733	AMY1C	protein_coding	0.735025	-2.26745	2.13748	-1.06081	0.288777	0.463004	Non Significant
ENSG00000170779	CDCA4	protein_coding	618.309	-2.26619	0.120901	-18.7442	2.15969e-78	1.31969e-76	Down Regulated in MdU1_PMA
ENSG00000137812	KNL1	protein_coding	1957.34	-2.26449	0.242787	-9.32705	1.08855e-20	1.06294e-19	Down Regulated in MdU1_PMA
ENSG00000121988	ZRANB3	protein_coding	181.534	-2.26418	0.264944	-8.54589	1.27551e-17	1.06343e-16	Down Regulated in MdU1_PMA
ENSG00000124159	MATN4	protein_coding	25.2547	-2.26399	0.37075	-6.10652	1.01829e-09	5.08912e-09	Down Regulated in MdU1_PMA
ENSG00000100218	RSPH14	protein_coding	4.32558	-2.26331	0.886342	-2.55354	0.0106633	0.0247593	Down Regulated in MdU1_PMA
ENSG00000055163	CYFIP2	protein_coding	1643.19	-2.2625	0.19025	-11.8923	1.29841e-32	2.02117e-31	Down Regulated in MdU1_PMA
ENSG00000069188	SDK2	protein_coding	2.05693	-2.26241	2.13763	-1.05838	0.289884	0.464575	Non Significant
ENSG00000154743	TSEN2	protein_coding	340.129	-2.26205	0.163353	-13.8476	1.31517e-43	2.98814e-42	Down Regulated in MdU1_PMA
ENSG00000177108	ZDHHC22	protein_coding	0.968565	-2.26172	2.99546	-0.755047	0.450221	0.66386	Non Significant
ENSG00000129009	ISLR	protein_coding	0.53286	-2.26115	4.16205	-0.543278	0.586939	0.806242	Non Significant
ENSG00000239697	TNFSF12	protein_coding	1.87554	-2.25963	1.65072	-1.36887	0.17104	0.2979	Non Significant
ENSG00000188910	GJB3	protein_coding	1.70006	-2.25793	1.29491	-1.74369	0.0812125	0.155456	Non Significant
ENSG00000180815	MAP3K15	protein_coding	147.691	-2.25719	0.224667	-10.0469	9.48444e-24	1.06334e-22	Down Regulated in MdU1_PMA
ENSG00000185052	SLC24A3	protein_coding	25.2653	-2.25698	0.488427	-4.62093	3.82031e-06	1.40502e-05	Down Regulated in MdU1_PMA
ENSG00000115107	STEAP3	protein_coding	583.561	-2.2543	0.170824	-13.1966	9.17844e-40	1.82235e-38	Down Regulated in MdU1_PMA
ENSG00000069431	ABCC9	protein_coding	2.51031	-2.25396	1.93265	-1.16625	0.243512	0.401891	Non Significant
ENSG00000154760	SLFN13	protein_coding	986.909	-2.25155	0.18857	-11.9401	7.31044e-33	1.1434e-31	Down Regulated in MdU1_PMA
ENSG00000226321	CROCC2	protein_coding	0.761923	-2.25131	4.26735	-0.527566	0.597801	0.816657	Non Significant
ENSG00000179774	ATOH7	protein_coding	1.29505	-2.25111	1.65511	-1.3601	0.1738	0.302172	Non Significant
ENSG00000185985	SLITRK2	protein_coding	1.37849	-2.251	2.16008	-1.04209	0.297369	0.474575	Non Significant
ENSG00000168496	FEN1	protein_coding	2038.18	-2.2501	0.163018	-13.8028	2.4519e-43	5.51356e-42	Down Regulated in MdU1_PMA
ENSG00000151090	THRB	protein_coding	2.33476	-2.2497	2.10305	-1.06973	0.28474	0.457686	Non Significant
ENSG00000165996	HACD1	protein_coding	128.746	-2.24966	0.289269	-7.77705	7.42358e-15	5.32503e-14	Down Regulated in MdU1_PMA
ENSG00000134508	CABLES1	protein_coding	269.756	-2.24909	0.168856	-13.3195	1.78251e-40	3.64581e-39	Down Regulated in MdU1_PMA
ENSG00000140044	JDP2	protein_coding	916.808	-2.2488	0.167799	-13.4017	5.90814e-41	1.23014e-39	Down Regulated in MdU1_PMA
ENSG00000164284	GRPEL2	protein_coding	910.852	-2.24668	0.131313	-17.1094	1.26362e-65	5.26758e-64	Down Regulated in MdU1_PMA
ENSG00000100749	VRK1	protein_coding	1321.29	-2.24604	0.15673	-14.3306	1.40855e-46	3.48174e-45	Down Regulated in MdU1_PMA
ENSG00000178184	PARD6G	protein_coding	113.397	-2.24574	0.267323	-8.40085	4.43276e-17	3.58631e-16	Down Regulated in MdU1_PMA
ENSG00000105202	FBL	protein_coding	4813.56	-2.24472	0.1911	-11.7463	7.38008e-32	1.13092e-30	Down Regulated in MdU1_PMA
ENSG00000075461	CACNG4	protein_coding	1.88004	-2.24466	1.49291	-1.50354	0.132699	0.239386	Non Significant
ENSG00000167037	SGSM1	protein_coding	9.12257	-2.24439	0.728793	-3.0796	0.00207281	0.00539909	Down Regulated in MdU1_PMA
ENSG00000136425	CIB2	protein_coding	80.6662	-2.24333	0.370775	-6.05039	1.44497e-09	7.13455e-09	Down Regulated in MdU1_PMA
ENSG00000180822	PSMG4	protein_coding	223.833	-2.24256	0.241106	-9.30115	1.38932e-20	1.34795e-19	Down Regulated in MdU1_PMA
ENSG00000173557	FAM166C	protein_coding	0.801025	-2.24246	3.78634	-0.59225	0.553683	0.774291	Non Significant
ENSG00000109265	CRACD	protein_coding	3.29569	-2.24192	1.40346	-1.59743	0.110171	0.203218	Non Significant
ENSG00000068781	STON1-GTF2A1L	protein_coding	3.5364	-2.24162	4.27576	-0.524262	0.600096	0.818837	Non Significant
ENSG00000161243	FBXO27	protein_coding	0.608717	-2.23943	4.27215	-0.524192	0.600145	0.818837	Non Significant
ENSG00000166473	PKD1L2	protein_coding	1.63069	-2.23904	1.61053	-1.39025	0.164452	0.288102	Non Significant
ENSG00000247626	MARS2	protein_coding	721.215	-2.2374	0.109448	-20.4425	7.00499e-93	5.74292e-91	Down Regulated in MdU1_PMA
ENSG00000079102	RUNX1T1	protein_coding	1.56872	-2.23719	2.73535	-0.817879	0.413426	0.621482	Non Significant
ENSG00000163285	GABRG1	protein_coding	0.42989	-2.23702	4.26847	-0.524079	0.600223	0.818888	Non Significant
ENSG00000120215	MLANA	protein_coding	9.41568	-2.23693	0.862304	-2.59413	0.00948311	0.0222448	Down Regulated in MdU1_PMA
ENSG00000132718	SYT11	protein_coding	16.2657	-2.23588	0.465789	-4.8002	1.58507e-06	6.03248e-06	Down Regulated in MdU1_PMA
ENSG00000146809	ASB15	protein_coding	0.823636	-2.23522	1.79593	-1.2446	0.213278	0.359564	Non Significant
ENSG00000122140	MRPS2	protein_coding	731.511	-2.23483	0.16802	-13.301	2.28426e-40	4.66236e-39	Down Regulated in MdU1_PMA
ENSG00000266826	IGBP1P2	protein_coding	0.445382	-2.23334	4.26883	-0.523174	0.600853	0.819576	Non Significant
ENSG00000111445	RFC5	protein_coding	838.861	-2.23276	0.124089	-17.9932	2.20153e-72	1.14294e-70	Down Regulated in MdU1_PMA
ENSG00000198033	TUBA3C	protein_coding	0.425363	-2.23077	4.27024	-0.522399	0.601392	0.820141	Non Significant
ENSG00000158748	HTR6	protein_coding	2.35142	-2.23018	1.27415	-1.75032	0.0800634	0.153511	Non Significant
ENSG00000176788	BASP1	protein_coding	713.126	-2.22975	0.120463	-18.5099	1.71792e-76	1.00302e-74	Down Regulated in MdU1_PMA
ENSG00000021355	SERPINB1	protein_coding	4632.51	-2.2287	0.1163	-19.1634	7.47584e-82	4.96941e-80	Down Regulated in MdU1_PMA
ENSG00000077063	CTTNBP2	protein_coding	2.04155	-2.22846	2.83717	-0.785453	0.432188	0.642907	Non Significant
ENSG00000169213	RAB3B	protein_coding	6.07724	-2.22741	0.762747	-2.92025	0.00349748	0.00876643	Down Regulated in MdU1_PMA
ENSG00000142149	HUNK	protein_coding	1.93536	-2.22617	1.66116	-1.34013	0.180204	0.311655	Non Significant
ENSG00000288721	ENSG00000288721	protein_coding	27.4411	-2.2255	0.507561	-4.38469	1.1615e-05	4.06649e-05	Down Regulated in MdU1_PMA
ENSG00000067606	PRKCZ	protein_coding	68.7205	-2.22516	0.305316	-7.28806	3.14447e-13	2.03388e-12	Down Regulated in MdU1_PMA
ENSG00000184166	OR1D2	protein_coding	0.358925	-2.22495	4.26814	-0.521292	0.602163	0.820851	Non Significant
ENSG00000145990	GFOD1	protein_coding	405.874	-2.22321	0.174105	-12.7694	2.43036e-37	4.48171e-36	Down Regulated in MdU1_PMA
ENSG00000132623	ANKEF1	protein_coding	3.88638	-2.22276	0.917344	-2.42304	0.0153911	0.0346455	Down Regulated in MdU1_PMA
ENSG00000138675	FGF5	protein_coding	3.12455	-2.22178	1.9489	-1.14002	0.254279	0.416655	Non Significant
ENSG00000146910	CNPY1	protein_coding	1.08393	-2.22138	3.01583	-0.736573	0.461382	0.676414	Non Significant
ENSG00000204614	TRIM40	protein_coding	0.300514	-2.22094	4.26351	-0.520918	0.602424	0.821092	Non Significant
ENSG00000185760	KCNQ5	protein_coding	934.196	-2.22091	0.167146	-13.2873	2.74328e-40	5.57611e-39	Down Regulated in MdU1_PMA
ENSG00000212122	TSSK1B	protein_coding	0.360722	-2.22069	4.26827	-0.52028	0.602869	0.821585	Non Significant
ENSG00000104154	SLC30A4	protein_coding	0.917155	-2.22065	2.03191	-1.09289	0.274442	0.444073	Non Significant
ENSG00000270106	TSNAX-DISC1	protein_coding	2.97059	-2.21957	1.12614	-1.97095	0.0487292	0.0984997	Non Significant
ENSG00000070404	FSTL3	protein_coding	147.332	-2.21905	0.311439	-7.12514	1.03973e-12	6.4945e-12	Down Regulated in MdU1_PMA
ENSG00000103257	SLC7A5	protein_coding	18153	-2.21829	0.124834	-17.7699	1.20856e-70	5.95981e-69	Down Regulated in MdU1_PMA
ENSG00000134323	MYCN	protein_coding	0.588415	-2.21743	4.26828	-0.519515	0.603402	0.821913	Non Significant
ENSG00000189134	NKAPL	protein_coding	1.43201	-2.21736	1.78637	-1.24127	0.214508	0.361215	Non Significant
ENSG00000091651	ORC6	protein_coding	755.378	-2.21734	0.126039	-17.5924	2.81582e-69	1.3067e-67	Down Regulated in MdU1_PMA
ENSG00000164778	EN2	protein_coding	2.43025	-2.21606	1.38841	-1.59611	0.110464	0.203627	Non Significant
ENSG00000243709	LEFTY1	protein_coding	11.1407	-2.21574	0.529398	-4.18539	2.84683e-05	9.52946e-05	Down Regulated in MdU1_PMA
ENSG00000175029	CTBP2	protein_coding	677.526	-2.21419	0.417961	-5.2976	1.17338e-07	4.96609e-07	Down Regulated in MdU1_PMA
ENSG00000013016	EHD3	protein_coding	6.35752	-2.21384	1.17905	-1.87765	0.0604295	0.119511	Non Significant
ENSG00000002746	HECW1	protein_coding	4.01449	-2.21351	1.1909	-1.85868	0.0630724	0.124225	Non Significant
ENSG00000165899	OTOGL	protein_coding	2.12987	-2.2133	3.25706	-0.679538	0.496797	0.714812	Non Significant
ENSG00000173253	DMRT2	protein_coding	0.387517	-2.21253	4.26817	-0.51838	0.604193	0.82257	Non Significant
ENSG00000168135	KCNJ4	protein_coding	1.3693	-2.21216	1.99275	-1.11011	0.266953	0.433917	Non Significant
ENSG00000182329	KIAA2012	protein_coding	0.548479	-2.21181	4.14962	-0.533014	0.594024	0.813588	Non Significant
ENSG00000173482	PTPRM	protein_coding	6.46842	-2.21162	1.31165	-1.68613	0.0917709	0.173091	Non Significant
ENSG00000168772	CXXC4	protein_coding	0.79189	-2.21148	3.15755	-0.700381	0.48369	0.700971	Non Significant
ENSG00000184428	TOP1MT	protein_coding	1082.79	-2.21079	0.135888	-16.2692	1.63292e-59	5.86303e-58	Down Regulated in MdU1_PMA
ENSG00000130147	SH3BP4	protein_coding	3.29776	-2.20821	2.13274	-1.03539	0.300488	0.478854	Non Significant
ENSG00000111728	ST8SIA1	protein_coding	1.81215	-2.20717	1.98952	-1.1094	0.267258	0.434269	Non Significant
ENSG00000249319	ENSG00000249319	protein_coding	6.16473	-2.20704	0.73922	-2.98563	0.00282991	0.00719861	Down Regulated in MdU1_PMA
ENSG00000174015	CBY2	protein_coding	0.631817	-2.2063	4.26999	-0.516698	0.605367	0.823336	Non Significant
ENSG00000132780	NASP	protein_coding	2786.56	-2.20424	0.118077	-18.6678	9.05123e-78	5.41313e-76	Down Regulated in MdU1_PMA
ENSG00000153823	PID1	protein_coding	0.815254	-2.20383	3.67093	-0.600346	0.548276	0.769079	Non Significant
ENSG00000196242	OR2C3	protein_coding	0.555621	-2.20333	3.53566	-0.623175	0.53317	0.753097	Non Significant
ENSG00000115159	GPD2	protein_coding	364.811	-2.20305	0.302558	-7.28142	3.30316e-13	2.13438e-12	Down Regulated in MdU1_PMA
ENSG00000213463	SYNJ2BP	protein_coding	6.86137	-2.20131	0.763639	-2.88266	0.00394336	0.00981446	Down Regulated in MdU1_PMA
ENSG00000091128	LAMB4	protein_coding	0.707757	-2.1983	4.26937	-0.514901	0.606622	0.824359	Non Significant
ENSG00000254585	MAGEL2	protein_coding	1.04427	-2.19772	4.27188	-0.514462	0.606929	0.82472	Non Significant
ENSG00000166938	DIS3L	protein_coding	922.149	-2.19578	0.193442	-11.3511	7.32302e-30	1.04411e-28	Down Regulated in MdU1_PMA
ENSG00000182199	SHMT2	protein_coding	8824.55	-2.19535	0.161086	-13.6284	2.71481e-42	5.98171e-41	Down Regulated in MdU1_PMA
ENSG00000121594	CD80	protein_coding	0.550049	-2.19492	3.04567	-0.720671	0.471112	0.68735	Non Significant
ENSG00000164900	GBX1	protein_coding	1.01297	-2.19467	1.67295	-1.31186	0.189567	0.325245	Non Significant
ENSG00000175928	LRRN1	protein_coding	1.33693	-2.19454	2.05922	-1.06571	0.286554	0.459927	Non Significant
ENSG00000114054	PCCB	protein_coding	1131.65	-2.1945	0.140003	-15.6747	2.25436e-55	7.30756e-54	Down Regulated in MdU1_PMA
ENSG00000170293	CMTM8	protein_coding	20.8192	-2.19375	0.395076	-5.55271	2.81271e-08	1.25352e-07	Down Regulated in MdU1_PMA
ENSG00000174226	SNX31	protein_coding	1.39047	-2.19342	1.90797	-1.14961	0.250304	0.41117	Non Significant
ENSG00000187391	MAGI2	protein_coding	8.25337	-2.19206	1.29905	-1.68743	0.0915211	0.172703	Non Significant
ENSG00000154274	C4orf19	protein_coding	49.8453	-2.19202	0.32575	-6.72914	1.70667e-11	9.8592e-11	Down Regulated in MdU1_PMA
ENSG00000125998	FAM83C	protein_coding	0.59618	-2.1918	3.00589	-0.729168	0.465899	0.681614	Non Significant
ENSG00000075429	CACNG5	protein_coding	4.78779	-2.191	1.09305	-2.00447	0.0450195	0.0916507	Non Significant
ENSG00000146918	NCAPG2	protein_coding	3130.41	-2.19091	0.12313	-17.7934	7.94662e-71	3.95842e-69	Down Regulated in MdU1_PMA
ENSG00000147536	GINS4	protein_coding	366.98	-2.19065	0.222122	-9.86239	6.05867e-23	6.56445e-22	Down Regulated in MdU1_PMA
ENSG00000156876	SASS6	protein_coding	596.95	-2.19015	0.151759	-14.4318	3.26524e-47	8.23677e-46	Down Regulated in MdU1_PMA
ENSG00000143194	MAEL	protein_coding	4.84697	-2.18845	1.2157	-1.80016	0.0718357	0.139296	Non Significant
ENSG00000073861	TBX21	protein_coding	0.751286	-2.18672	3.23338	-0.676296	0.498853	0.716978	Non Significant
ENSG00000179915	NRXN1	protein_coding	11.3959	-2.18637	1.39558	-1.56664	0.117199	0.214612	Non Significant
ENSG00000267508	ZNF285	protein_coding	1.18109	-2.1855	3.29621	-0.663036	0.507308	0.726688	Non Significant
ENSG00000124216	SNAI1	protein_coding	29.838	-2.18484	0.367358	-5.94745	2.72346e-09	1.31793e-08	Down Regulated in MdU1_PMA
ENSG00000160801	PTH1R	protein_coding	1.30294	-2.18446	3.77778	-0.57824	0.563102	0.783045	Non Significant
ENSG00000127903	ZNF835	protein_coding	1.18673	-2.18412	2.81171	-0.776796	0.437279	0.649107	Non Significant
ENSG00000104941	RSPH6A	protein_coding	0.973082	-2.1829	3.15438	-0.692022	0.488923	0.706422	Non Significant
ENSG00000161692	DBF4B	protein_coding	283.531	-2.1827	0.233114	-9.36322	7.7343e-21	7.61282e-20	Down Regulated in MdU1_PMA
ENSG00000082516	GEMIN5	protein_coding	525.147	-2.18239	0.166803	-13.0836	4.08672e-39	7.93783e-38	Down Regulated in MdU1_PMA
ENSG00000105641	SLC5A5	protein_coding	1.01361	-2.1811	2.94395	-0.740876	0.458769	0.673536	Non Significant
ENSG00000105186	ANKRD27	protein_coding	3513	-2.18072	0.0876085	-24.8917	9.16021e-137	1.93803e-134	Down Regulated in MdU1_PMA
ENSG00000198832	SELENOM	protein_coding	17.284	-2.18067	0.551137	-3.95668	7.60002e-05	0.000241229	Down Regulated in MdU1_PMA
ENSG00000183856	IQGAP3	protein_coding	973.76	-2.17897	0.131521	-16.5675	1.1974e-61	4.53077e-60	Down Regulated in MdU1_PMA
ENSG00000120729	MYOT	protein_coding	1.4961	-2.17817	1.6796	-1.29684	0.194688	0.332847	Non Significant
ENSG00000102384	CENPI	protein_coding	415.314	-2.17753	0.214365	-10.158	3.05134e-24	3.48857e-23	Down Regulated in MdU1_PMA
ENSG00000213390	ARHGAP19	protein_coding	1701.94	-2.17727	0.138504	-15.7199	1.10438e-55	3.60961e-54	Down Regulated in MdU1_PMA
ENSG00000167613	LAIR1	protein_coding	2394.26	-2.17714	0.176319	-12.3477	5.00999e-35	8.4038e-34	Down Regulated in MdU1_PMA
ENSG00000009709	PAX7	protein_coding	0.713563	-2.17678	4.27145	-0.509611	0.610324	0.828017	Non Significant
ENSG00000144485	HES6	protein_coding	1335.95	-2.17668	0.233419	-9.32518	1.10791e-20	1.08077e-19	Down Regulated in MdU1_PMA
ENSG00000127241	MASP1	protein_coding	1.43661	-2.17617	2.42496	-0.897405	0.369503	0.568395	Non Significant
ENSG00000057704	TMCC3	protein_coding	7.12658	-2.17376	0.527334	-4.12217	3.75321e-05	0.000123906	Down Regulated in MdU1_PMA
ENSG00000130713	EXOSC2	protein_coding	678.068	-2.17195	0.12849	-16.9037	4.22559e-64	1.69679e-62	Down Regulated in MdU1_PMA
ENSG00000156521	TYSND1	protein_coding	209.396	-2.17184	0.244746	-8.87383	7.06703e-19	6.37264e-18	Down Regulated in MdU1_PMA
ENSG00000184564	SLITRK6	protein_coding	0.586458	-2.17184	4.26852	-0.508803	0.61089	0.828443	Non Significant
ENSG00000223731	SUPT20HL1	protein_coding	0.56702	-2.17166	4.11711	-0.527473	0.597865	0.816657	Non Significant
ENSG00000087301	TXNDC16	protein_coding	325.785	-2.16957	0.171062	-12.6829	7.35514e-37	1.3277e-35	Down Regulated in MdU1_PMA
ENSG00000148735	PLEKHS1	protein_coding	3.19928	-2.16901	1.19915	-1.80878	0.0704846	0.137177	Non Significant
ENSG00000007171	NOS2	protein_coding	5.20574	-2.16797	0.919397	-2.35804	0.0183719	0.0406987	Down Regulated in MdU1_PMA
ENSG00000103196	CRISPLD2	protein_coding	2.8264	-2.16553	1.18719	-1.82407	0.068141	0.133116	Non Significant
ENSG00000181450	ZNF678	protein_coding	29.1903	-2.16541	1.07816	-2.00843	0.0445974	0.0909324	Non Significant
ENSG00000134057	CCNB1	protein_coding	2356.22	-2.16528	0.146814	-14.7485	3.14794e-49	8.34755e-48	Down Regulated in MdU1_PMA
ENSG00000152990	ADGRA3	protein_coding	1755.8	-2.1652	0.143035	-15.1376	9.15078e-52	2.61322e-50	Down Regulated in MdU1_PMA
ENSG00000167775	CD320	protein_coding	361.361	-2.16399	0.227915	-9.4947	2.20847e-21	2.2422e-20	Down Regulated in MdU1_PMA
ENSG00000221829	FANCG	protein_coding	430.088	-2.1639	0.219789	-9.84532	7.18092e-23	7.75476e-22	Down Regulated in MdU1_PMA
ENSG00000170624	SGCD	protein_coding	2.45122	-2.16384	2.10373	-1.02857	0.303681	0.483198	Non Significant
ENSG00000285816	ENSG00000285816	protein_coding	15.0862	-2.16357	1.74234	-1.24176	0.214324	0.360956	Non Significant
ENSG00000197106	SLC6A17	protein_coding	4.35938	-2.16141	1.25321	-1.72469	0.0845826	0.161015	Non Significant
ENSG00000160994	CCDC105	protein_coding	0.981829	-2.16135	4.27211	-0.50592	0.612913	0.830305	Non Significant
ENSG00000179913	B3GNT3	protein_coding	0.65591	-2.16109	3.37906	-0.639555	0.522462	0.742075	Non Significant
ENSG00000164588	HCN1	protein_coding	0.796669	-2.16047	3.20502	-0.674091	0.500254	0.718686	Non Significant
ENSG00000050555	LAMC3	protein_coding	2.78429	-2.16041	2.31159	-0.934599	0.349995	0.543356	Non Significant
ENSG00000141748	ARL5C	protein_coding	0.840932	-2.15991	2.2573	-0.956855	0.338641	0.528733	Non Significant
ENSG00000139946	PELI2	protein_coding	648.532	-2.15981	0.170184	-12.691	6.63223e-37	1.19831e-35	Down Regulated in MdU1_PMA
ENSG00000180828	BHLHE22	protein_coding	1.01156	-2.15659	4.08078	-0.528474	0.59717	0.816199	Non Significant
ENSG00000123407	HOXC12	protein_coding	0.73648	-2.15612	4.26208	-0.505883	0.612939	0.830305	Non Significant
ENSG00000185238	PRMT3	protein_coding	585.325	-2.15407	0.127886	-16.8436	1.16858e-63	4.65444e-62	Down Regulated in MdU1_PMA
ENSG00000170264	FAM161A	protein_coding	114.94	-2.15314	0.311555	-6.91093	4.81476e-12	2.88827e-11	Down Regulated in MdU1_PMA
ENSG00000135045	C9orf40	protein_coding	441.478	-2.15135	0.158174	-13.6012	3.94053e-42	8.58624e-41	Down Regulated in MdU1_PMA
ENSG00000163918	RFC4	protein_coding	1181.13	-2.1511	0.13043	-16.4924	4.16324e-61	1.53688e-59	Down Regulated in MdU1_PMA
ENSG00000140057	AK7	protein_coding	1.76404	-2.15104	1.69653	-1.26791	0.204831	0.347796	Non Significant
ENSG00000184307	ZDHHC23	protein_coding	306.708	-2.15091	0.165305	-13.0118	1.04858e-38	2.0031e-37	Down Regulated in MdU1_PMA
ENSG00000179583	CIITA	protein_coding	91.9705	-2.15033	0.414845	-5.18345	2.17816e-07	9.01124e-07	Down Regulated in MdU1_PMA
ENSG00000068078	FGFR3	protein_coding	16.0219	-2.15022	0.649628	-3.30993	0.000933204	0.00256377	Down Regulated in MdU1_PMA
ENSG00000218819	TDRD15	protein_coding	0.87762	-2.14917	4.272	-0.503083	0.614906	0.832454	Non Significant
ENSG00000134627	PIWIL4	protein_coding	789.474	-2.14901	0.16633	-12.9202	3.46445e-38	6.5419e-37	Down Regulated in MdU1_PMA
ENSG00000213204	ENSG00000213204	protein_coding	2.75464	-2.14493	1.28626	-1.66758	0.0954	0.179095	Non Significant
ENSG00000157851	DPYSL5	protein_coding	0.938516	-2.1444	1.69298	-1.26665	0.205282	0.348321	Non Significant
ENSG00000204922	UQCC3	protein_coding	336.533	-2.14415	0.239793	-8.94168	3.83289e-19	3.50283e-18	Down Regulated in MdU1_PMA
ENSG00000118307	DNAI7	protein_coding	1.14944	-2.14397	3.41343	-0.6281	0.529938	0.749924	Non Significant
ENSG00000188916	INSYN2A	protein_coding	0.797913	-2.14359	4.27183	-0.501796	0.615811	0.833278	Non Significant
ENSG00000172733	PURG	protein_coding	8.32334	-2.1435	0.524799	-4.08443	4.41858e-05	0.000144611	Down Regulated in MdU1_PMA
ENSG00000278633	ENSG00000278633	protein_coding	0.322026	-2.14284	4.2697	-0.501871	0.615758	0.833278	Non Significant
ENSG00000177508	IRX3	protein_coding	2706.75	-2.14276	0.157827	-13.5766	5.5104e-42	1.1954e-40	Down Regulated in MdU1_PMA
ENSG00000182459	TEX19	protein_coding	5.56519	-2.14226	0.707567	-3.02765	0.00246465	0.00634247	Down Regulated in MdU1_PMA
ENSG00000277775	H3C7	protein_coding	0.911824	-2.14206	1.98039	-1.08164	0.279415	0.45071	Non Significant
ENSG00000198844	ARHGEF15	protein_coding	1.94501	-2.14081	3.32044	-0.644737	0.519097	0.738369	Non Significant
ENSG00000148053	NTRK2	protein_coding	4.52045	-2.14032	1.44468	-1.48152	0.138469	0.248406	Non Significant
ENSG00000125378	BMP4	protein_coding	0.862043	-2.13986	3.6562	-0.585268	0.558367	0.779185	Non Significant
ENSG00000167178	ISLR2	protein_coding	2.90535	-2.13924	1.87913	-1.13842	0.254947	0.417506	Non Significant
ENSG00000151067	CACNA1C	protein_coding	51.1778	-2.13728	0.329995	-6.47671	9.37416e-11	5.09519e-10	Down Regulated in MdU1_PMA
ENSG00000237515	SHISA9	protein_coding	4.03665	-2.13615	2.02663	-1.05404	0.291863	0.467304	Non Significant
ENSG00000273274	ZBTB8B	protein_coding	2.33159	-2.13569	1.39765	-1.52806	0.126499	0.229442	Non Significant
ENSG00000226650	KIF4B	protein_coding	8.43962	-2.13384	0.647521	-3.2954	0.000982826	0.00269258	Down Regulated in MdU1_PMA
ENSG00000135540	NHSL1	protein_coding	874.209	-2.13281	0.189165	-11.2749	1.74649e-29	2.45281e-28	Down Regulated in MdU1_PMA
ENSG00000090861	AARS1	protein_coding	7036.87	-2.13234	0.0998872	-21.3475	4.11367e-101	3.98722e-99	Down Regulated in MdU1_PMA
ENSG00000065183	WDR3	protein_coding	1036.85	-2.13167	0.238435	-8.94027	3.88226e-19	3.5463e-18	Down Regulated in MdU1_PMA
ENSG00000156313	RPGR	protein_coding	525.885	-2.13091	0.176709	-12.0589	1.74121e-33	2.77634e-32	Down Regulated in MdU1_PMA
ENSG00000018236	CNTN1	protein_coding	2.16598	-2.1303	1.59269	-1.33755	0.181044	0.312942	Non Significant
ENSG00000129910	CDH15	protein_coding	1.13991	-2.13026	2.20604	-0.965648	0.33422	0.523243	Non Significant
ENSG00000172167	MTBP	protein_coding	417.115	-2.1282	0.150213	-14.1679	1.44712e-45	3.45552e-44	Down Regulated in MdU1_PMA
ENSG00000100505	TRIM9	protein_coding	45.2163	-2.12807	0.418278	-5.08768	3.62464e-07	1.4717e-06	Down Regulated in MdU1_PMA
ENSG00000101331	CCM2L	protein_coding	31.4711	-2.12708	0.365946	-5.81254	6.15337e-09	2.90206e-08	Down Regulated in MdU1_PMA
ENSG00000145147	SLIT2	protein_coding	2.8108	-2.12677	1.81091	-1.17442	0.240227	0.397336	Non Significant
ENSG00000125630	POLR1B	protein_coding	1102.37	-2.12641	0.161249	-13.1871	1.04111e-39	2.06293e-38	Down Regulated in MdU1_PMA
ENSG00000151849	CENPJ	protein_coding	764.707	-2.12603	0.163602	-12.9951	1.30404e-38	2.48868e-37	Down Regulated in MdU1_PMA
ENSG00000204610	TRIM15	protein_coding	1.15483	-2.12588	2.90716	-0.731257	0.464622	0.680303	Non Significant
ENSG00000164037	SLC9B1	protein_coding	5.73704	-2.1254	0.852426	-2.49335	0.0126542	0.0289585	Down Regulated in MdU1_PMA
ENSG00000174951	FUT1	protein_coding	0.926651	-2.12448	2.05587	-1.03337	0.301431	0.480083	Non Significant
ENSG00000117281	CD160	protein_coding	38.2716	-2.12386	0.388765	-5.46308	4.67943e-08	2.04787e-07	Down Regulated in MdU1_PMA
ENSG00000185842	DNAH14	protein_coding	105.383	-2.12372	0.430419	-4.93408	8.05313e-07	3.15707e-06	Down Regulated in MdU1_PMA
ENSG00000178163	ZNF518B	protein_coding	2.91792	-2.1222	2.33301	-0.909641	0.363012	0.560162	Non Significant
ENSG00000163923	RPL39L	protein_coding	298.229	-2.12208	0.260877	-8.13441	4.13941e-16	3.1865e-15	Down Regulated in MdU1_PMA
ENSG00000213402	PTPRCAP	protein_coding	1.85097	-2.12136	2.42448	-0.874975	0.381588	0.583381	Non Significant
ENSG00000158321	AUTS2	protein_coding	4.2544	-2.11887	1.44487	-1.46648	0.142517	0.254484	Non Significant
ENSG00000213988	ZNF90	protein_coding	3.99428	-2.11837	0.705885	-3.00101	0.00269088	0.00687428	Down Regulated in MdU1_PMA
ENSG00000128165	ADM2	protein_coding	95.3214	-2.11752	0.270001	-7.84266	4.41085e-15	3.20724e-14	Down Regulated in MdU1_PMA
ENSG00000130413	STK33	protein_coding	1.09679	-2.11716	2.93351	-0.721717	0.470469	0.686768	Non Significant
ENSG00000138622	HCN4	protein_coding	2.19852	-2.1166	2.1041	-1.00594	0.314445	0.497548	Non Significant
ENSG00000219607	PPP1R3G	protein_coding	4.39826	-2.11622	0.748106	-2.82877	0.00467267	0.0114766	Down Regulated in MdU1_PMA
ENSG00000163072	NOSTRIN	protein_coding	11.6193	-2.11616	0.631687	-3.35002	0.000808063	0.00224378	Down Regulated in MdU1_PMA
ENSG00000130270	ATP8B3	protein_coding	391.412	-2.11548	0.292272	-7.23807	4.55125e-13	2.91316e-12	Down Regulated in MdU1_PMA
ENSG00000187513	GJA4	protein_coding	1.05009	-2.11434	1.81093	-1.16754	0.242991	0.4012	Non Significant
ENSG00000145416	MARCHF1	protein_coding	113.485	-2.1141	0.266526	-7.93204	2.15578e-15	1.58866e-14	Down Regulated in MdU1_PMA
ENSG00000113361	CDH6	protein_coding	0.712405	-2.1134	2.80878	-0.752427	0.451794	0.665881	Non Significant
ENSG00000149403	GRIK4	protein_coding	2.18322	-2.11281	2.41678	-0.874224	0.381996	0.583685	Non Significant
ENSG00000128610	FEZF1	protein_coding	0.782605	-2.11211	4.26831	-0.494834	0.620717	0.837641	Non Significant
ENSG00000285976	ENSG00000285976	protein_coding	67.5876	-2.11147	1.83621	-1.1499	0.250183	0.411005	Non Significant
ENSG00000184903	IMMP2L	protein_coding	67.5953	-2.10734	0.369412	-5.70459	1.16625e-08	5.39045e-08	Down Regulated in MdU1_PMA
ENSG00000167670	CHAF1A	protein_coding	1698.23	-2.10615	0.160013	-13.1624	1.44412e-39	2.85287e-38	Down Regulated in MdU1_PMA
ENSG00000130427	EPO	protein_coding	1.2155	-2.10456	1.60335	-1.3126	0.189318	0.324893	Non Significant
ENSG00000186188	FFAR4	protein_coding	0.619101	-2.10362	3.40154	-0.618431	0.536291	0.756637	Non Significant
ENSG00000163632	C3orf49	protein_coding	1.57595	-2.1029	1.36298	-1.54287	0.122862	0.223547	Non Significant
ENSG00000130768	SMPDL3B	protein_coding	4.87794	-2.10283	0.942979	-2.22999	0.0257481	0.0552958	Non Significant
ENSG00000169777	TAS2R1	protein_coding	0.526775	-2.10255	4.27576	-0.491737	0.622905	0.83951	Non Significant
ENSG00000100522	GNPNAT1	protein_coding	425.974	-2.1025	0.219904	-9.56098	1.16651e-21	1.20043e-20	Down Regulated in MdU1_PMA
ENSG00000188807	TMEM201	protein_coding	394.486	-2.10248	0.13574	-15.489	4.11545e-54	1.26921e-52	Down Regulated in MdU1_PMA
ENSG00000285130	ENSG00000285130	protein_coding	48.7276	-2.10046	0.565361	-3.71525	0.000203	0.000610739	Down Regulated in MdU1_PMA
ENSG00000180287	PLD5	protein_coding	1.29366	-2.10011	2.44603	-0.858579	0.390573	0.594163	Non Significant
ENSG00000086506	HBQ1	protein_coding	0.349451	-2.10006	4.27106	-0.491697	0.622934	0.83951	Non Significant
ENSG00000163092	XIRP2	protein_coding	1.02172	-2.0999	4.06628	-0.516417	0.605563	0.823432	Non Significant
ENSG00000283930	PLD5P1	protein_coding	9.19244	-2.09816	1.19824	-1.75104	0.0799397	0.153288	Non Significant
ENSG00000175093	SPSB4	protein_coding	3.36969	-2.09805	1.39489	-1.5041	0.132556	0.23915	Non Significant
ENSG00000152137	HSPB8	protein_coding	0.536373	-2.09738	4.27028	-0.491158	0.623315	0.839736	Non Significant
ENSG00000163864	NMNAT3	protein_coding	608.524	-2.09651	0.169171	-12.3929	2.85642e-35	4.86184e-34	Down Regulated in MdU1_PMA
ENSG00000211891	IGHE	IG_C_gene	0.370562	-2.09637	4.27148	-0.490782	0.623581	0.840011	Non Significant
ENSG00000140519	RHCG	protein_coding	0.501063	-2.09537	4.27124	-0.490576	0.623726	0.840117	Non Significant
ENSG00000232653	GOLGA8N	protein_coding	7895.59	-2.09509	0.172287	-12.1604	5.04817e-34	8.17513e-33	Down Regulated in MdU1_PMA
ENSG00000120696	KBTBD7	protein_coding	357.614	-2.0936	0.159735	-13.1067	3.01277e-39	5.88087e-38	Down Regulated in MdU1_PMA
ENSG00000197928	ZNF677	protein_coding	1.43775	-2.09304	1.56785	-1.33497	0.181886	0.314139	Non Significant
ENSG00000129990	SYT5	protein_coding	10.8641	-2.09047	0.893309	-2.34014	0.0192764	0.0425299	Down Regulated in MdU1_PMA
ENSG00000187243	MAGED4B	protein_coding	0.514613	-2.0903	4.27554	-0.488897	0.624915	0.841085	Non Significant
ENSG00000242715	CCDC169	protein_coding	318.193	-2.09015	0.163572	-12.7782	2.17091e-37	4.01455e-36	Down Regulated in MdU1_PMA
ENSG00000164853	UNCX	protein_coding	155.903	-2.08992	0.23589	-8.85975	8.01923e-19	7.21144e-18	Down Regulated in MdU1_PMA
ENSG00000176225	RTTN	protein_coding	680.708	-2.08959	0.150999	-13.8384	1.49501e-43	3.38893e-42	Down Regulated in MdU1_PMA
ENSG00000126231	PROZ	protein_coding	3.17524	-2.08912	1.05492	-1.98036	0.0476633	0.0964839	Non Significant
ENSG00000159713	TPPP3	protein_coding	0.720471	-2.08792	2.92813	-0.713055	0.475812	0.692256	Non Significant
ENSG00000169679	BUB1	protein_coding	2118.54	-2.08722	0.136612	-15.2785	1.0633e-52	3.12261e-51	Down Regulated in MdU1_PMA
ENSG00000103460	TOX3	protein_coding	4.18908	-2.08715	1.97187	-1.05846	0.289846	0.464566	Non Significant
ENSG00000170854	RIOX2	protein_coding	1105.83	-2.08664	0.179971	-11.5943	4.40443e-31	6.57025e-30	Down Regulated in MdU1_PMA
ENSG00000132554	RGS22	protein_coding	1.46591	-2.08609	1.80819	-1.15369	0.248627	0.408995	Non Significant
ENSG00000126602	TRAP1	protein_coding	1803.81	-2.08571	0.20131	-10.3607	3.74116e-25	4.45318e-24	Down Regulated in MdU1_PMA
ENSG00000249242	TMEM150C	protein_coding	3.90023	-2.08563	0.986278	-2.11465	0.0344598	0.0722	Non Significant
ENSG00000151503	NCAPD3	protein_coding	3122.42	-2.08453	0.0761454	-27.3757	5.33699e-165	2.05903e-162	Down Regulated in MdU1_PMA
ENSG00000263809	ENSG00000263809	protein_coding	3.00783	-2.08447	0.946791	-2.20161	0.0276926	0.0591168	Non Significant
ENSG00000204287	HLA-DRA	protein_coding	2.74653	-2.08366	0.910135	-2.2894	0.0220561	0.048054	Down Regulated in MdU1_PMA
ENSG00000178882	RFLNA	protein_coding	6.81848	-2.08345	0.869738	-2.39549	0.0165983	0.0371038	Down Regulated in MdU1_PMA
ENSG00000183715	OPCML	protein_coding	15.4687	-2.08227	1.24384	-1.67407	0.0941167	0.176989	Non Significant
ENSG00000214336	FOXI3	protein_coding	0.90695	-2.08139	3.5764	-0.58198	0.56058	0.780902	Non Significant
ENSG00000163873	GRIK3	protein_coding	154.093	-2.07994	0.220227	-9.44452	3.57042e-21	3.58609e-20	Down Regulated in MdU1_PMA
ENSG00000278259	MYO19	protein_coding	1206.71	-2.07875	0.128537	-16.1723	7.90469e-59	2.78234e-57	Down Regulated in MdU1_PMA
ENSG00000133706	LARS1	protein_coding	5401.56	-2.07819	0.124219	-16.7301	7.91207e-63	3.04653e-61	Down Regulated in MdU1_PMA
ENSG00000204851	PNMA8B	protein_coding	0.69888	-2.07742	2.88558	-0.719932	0.471567	0.687741	Non Significant
ENSG00000212124	TAS2R19	protein_coding	1.73261	-2.07725	1.24398	-1.66984	0.094951	0.178439	Non Significant
ENSG00000185942	NKAIN3	protein_coding	5.83661	-2.07613	1.62582	-1.27698	0.20161	0.343186	Non Significant
ENSG00000136169	SETDB2	protein_coding	2616.67	-2.0756	0.107265	-19.3501	2.03289e-83	1.4134e-81	Down Regulated in MdU1_PMA
ENSG00000165084	C8orf34	protein_coding	13.451	-2.07468	1.14049	-1.8191	0.0688955	0.13439	Non Significant
ENSG00000158156	XKR8	protein_coding	14.8923	-2.07439	0.944312	-2.19672	0.0280404	0.0597945	Non Significant
ENSG00000075035	WSCD2	protein_coding	2.75964	-2.07388	1.56091	-1.32863	0.18397	0.317136	Non Significant
ENSG00000275004	ZNF280B	protein_coding	140.631	-2.07182	0.156975	-13.1984	8.95839e-40	1.78046e-38	Down Regulated in MdU1_PMA
ENSG00000113396	SLC27A6	protein_coding	0.327226	-2.07167	4.27117	-0.485036	0.627651	0.843844	Non Significant
ENSG00000203883	SOX18	protein_coding	1.03052	-2.07167	2.64052	-0.784569	0.432706	0.643483	Non Significant
ENSG00000164182	NDUFAF2	protein_coding	473.368	-2.07137	0.230368	-8.99157	2.43733e-19	2.24833e-18	Down Regulated in MdU1_PMA
ENSG00000143195	ILDR2	protein_coding	67.5241	-2.07009	0.977636	-2.11745	0.0342219	0.0717399	Non Significant
ENSG00000146374	RSPO3	protein_coding	0.75817	-2.06984	4.2695	-0.484797	0.62782	0.844014	Non Significant
ENSG00000130176	CNN1	protein_coding	4.10197	-2.06967	1.43582	-1.44145	0.149458	0.265362	Non Significant
ENSG00000172322	CLEC12A	protein_coding	1530.04	-2.06946	0.176132	-11.7495	7.1051e-32	1.08963e-30	Down Regulated in MdU1_PMA
ENSG00000064042	LIMCH1	protein_coding	3.8959	-2.0677	1.80564	-1.14514	0.252153	0.413653	Non Significant
ENSG00000106819	ASPN	protein_coding	0.979993	-2.06634	1.69557	-1.21867	0.22297	0.37255	Non Significant
ENSG00000178295	GEN1	protein_coding	925.033	-2.06603	0.236369	-8.7407	2.31672e-18	2.02505e-17	Down Regulated in MdU1_PMA
ENSG00000043039	BARX2	protein_coding	3.21453	-2.06599	1.45934	-1.4157	0.156864	0.276663	Non Significant
ENSG00000169862	CTNND2	protein_coding	4.50614	-2.06584	1.5265	-1.35332	0.175954	0.30527	Non Significant
ENSG00000278463	H2AC4	protein_coding	0.385853	-2.06524	3.97653	-0.519357	0.603512	0.821974	Non Significant
ENSG00000196240	OR2T2	protein_coding	0.285667	-2.0645	4.27125	-0.483349	0.628848	0.844836	Non Significant
ENSG00000180884	ZNF792	protein_coding	69.6706	-2.06434	1.07455	-1.92112	0.0547172	0.109334	Non Significant
ENSG00000166341	DCHS1	protein_coding	53.655	-2.06415	0.440899	-4.68169	2.84521e-06	1.05867e-05	Down Regulated in MdU1_PMA
ENSG00000101115	SALL4	protein_coding	1.72034	-2.06377	1.5123	-1.36466	0.17236	0.299987	Non Significant
ENSG00000162779	AXDND1	protein_coding	2.00314	-2.06285	2.15727	-0.956234	0.338954	0.529099	Non Significant
ENSG00000285772	ENSG00000285772	protein_coding	0.319066	-2.06118	4.26614	-0.48315	0.628989	0.844893	Non Significant
ENSG00000203760	CENPW	protein_coding	953.662	-2.06112	0.198466	-10.3852	2.89445e-25	3.45787e-24	Down Regulated in MdU1_PMA
ENSG00000008438	PGLYRP1	protein_coding	0.610881	-2.06091	2.14508	-0.960759	0.336673	0.526121	Non Significant
ENSG00000129028	THAP10	protein_coding	14.2413	-2.06073	1.12122	-1.83794	0.0660709	0.129444	Non Significant
ENSG00000141469	SLC14A1	protein_coding	96.7342	-2.06059	0.346147	-5.95293	2.63391e-09	1.27584e-08	Down Regulated in MdU1_PMA
ENSG00000259417	CTXND1	protein_coding	12.5586	-2.06015	0.506859	-4.06455	4.81246e-05	0.000156512	Down Regulated in MdU1_PMA
ENSG00000123411	IKZF4	protein_coding	174.384	-2.0597	0.236819	-8.69736	3.39706e-18	2.92519e-17	Down Regulated in MdU1_PMA
ENSG00000163064	EN1	protein_coding	0.372168	-2.05965	4.26177	-0.483286	0.628893	0.844836	Non Significant
ENSG00000188385	JAKMIP3	protein_coding	44.1558	-2.05839	0.370451	-5.55644	2.75332e-08	1.22761e-07	Down Regulated in MdU1_PMA
ENSG00000093217	XYLB	protein_coding	110.023	-2.05721	0.268615	-7.65859	1.87986e-14	1.3149e-13	Down Regulated in MdU1_PMA
ENSG00000214706	IFRD2	protein_coding	1218.34	-2.05695	0.191217	-10.7571	5.48677e-27	7.04685e-26	Down Regulated in MdU1_PMA
ENSG00000132259	CNGA4	protein_coding	1.01934	-2.05688	1.80891	-1.13708	0.255504	0.41828	Non Significant
ENSG00000140450	ARRDC4	protein_coding	26.5948	-2.05495	1.14676	-1.79196	0.0731401	0.141449	Non Significant
ENSG00000105708	ZNF14	protein_coding	33.8463	-2.05493	1.09642	-1.87421	0.0609009	0.120334	Non Significant
ENSG00000181585	TMIE	protein_coding	0.303768	-2.05432	4.271	-0.480993	0.630521	0.846316	Non Significant
ENSG00000105974	CAV1	protein_coding	25.6019	-2.05335	1.07075	-1.91768	0.0551519	0.110091	Non Significant
ENSG00000174640	SLCO2A1	protein_coding	4.0867	-2.0531	1.41015	-1.45595	0.145407	0.258963	Non Significant
ENSG00000158286	RNF207	protein_coding	12.2349	-2.05208	0.905182	-2.26704	0.0233877	0.0506746	Non Significant
ENSG00000170745	KCNS3	protein_coding	0.466159	-2.05126	4.27307	-0.480043	0.631197	0.846732	Non Significant
ENSG00000139438	FAM222A	protein_coding	29.6721	-2.05124	0.338895	-6.05271	1.42425e-09	7.03401e-09	Down Regulated in MdU1_PMA
ENSG00000235268	KDM4E	protein_coding	0.28335	-2.05087	4.27153	-0.480125	0.631138	0.846732	Non Significant
ENSG00000153002	CPB1	protein_coding	0.662341	-2.0504	2.92644	-0.700648	0.483523	0.700883	Non Significant
ENSG00000198445	CCT8L2	protein_coding	0.321088	-2.05039	4.27155	-0.480012	0.631219	0.846732	Non Significant
ENSG00000102195	GPR50	protein_coding	0.283818	-2.04952	4.27158	-0.479803	0.631367	0.846873	Non Significant
ENSG00000165732	DDX21	protein_coding	4029.76	-2.0493	0.166339	-12.32	7.06601e-35	1.18023e-33	Down Regulated in MdU1_PMA
ENSG00000198039	ZNF273	protein_coding	256.67	-2.04879	0.190258	-10.7685	4.84906e-27	6.2564e-26	Down Regulated in MdU1_PMA
ENSG00000104879	CKM	protein_coding	1.16893	-2.04674	1.89818	-1.07826	0.280916	0.45276	Non Significant
ENSG00000070193	FGF10	protein_coding	1.06804	-2.04633	4.00432	-0.51103	0.60933	0.827239	Non Significant
ENSG00000185652	NTF3	protein_coding	0.499998	-2.04573	4.27382	-0.478665	0.632177	0.847711	Non Significant
ENSG00000158813	EDA	protein_coding	49.0939	-2.04501	1.0498	-1.94799	0.0514157	0.103452	Non Significant
ENSG00000253767	PCDHGA8	protein_coding	4.24872	-2.04484	1.43954	-1.42047	0.15547	0.274706	Non Significant
ENSG00000109851	DBX1	protein_coding	0.286333	-2.04255	4.27182	-0.478144	0.632548	0.847918	Non Significant
ENSG00000118523	CCN2	protein_coding	0.780051	-2.04242	4.27296	-0.477989	0.632658	0.847918	Non Significant
ENSG00000285749	ENSG00000285749	protein_coding	12.6429	-2.04219	1.12771	-1.81091	0.0701549	0.136616	Non Significant
ENSG00000172350	ABCG4	protein_coding	4.19603	-2.04205	0.808082	-2.52703	0.0115033	0.02655	Down Regulated in MdU1_PMA
ENSG00000172935	MRGPRF	protein_coding	0.374206	-2.04174	4.27062	-0.478089	0.632587	0.847918	Non Significant
ENSG00000160207	HSF2BP	protein_coding	30.533	-2.04164	0.304203	-6.71144	1.92718e-11	1.1081e-10	Down Regulated in MdU1_PMA
ENSG00000116675	DNAJC6	protein_coding	258.97	-2.04102	0.229226	-8.90393	5.39042e-19	4.8899e-18	Down Regulated in MdU1_PMA
ENSG00000146411	SLC2A12	protein_coding	1.69772	-2.03929	2.86281	-0.712339	0.476255	0.692491	Non Significant
ENSG00000153904	DDAH1	protein_coding	0.981972	-2.03927	2.23887	-0.910851	0.362374	0.559396	Non Significant
ENSG00000198846	TOX	protein_coding	141.964	-2.03882	0.299461	-6.8083	9.87587e-12	5.80986e-11	Down Regulated in MdU1_PMA
ENSG00000186283	TOR3A	protein_coding	804.469	-2.03702	0.123109	-16.5465	1.69788e-61	6.38768e-60	Down Regulated in MdU1_PMA
ENSG00000100290	BIK	protein_coding	22.9489	-2.03648	1.11619	-1.82449	0.0680783	0.13302	Non Significant
ENSG00000136848	DAB2IP	protein_coding	18.2422	-2.0363	0.745404	-2.73181	0.0062988	0.0151788	Down Regulated in MdU1_PMA
ENSG00000165626	BEND7	protein_coding	0.622316	-2.03594	4.27241	-0.476532	0.633695	0.848842	Non Significant
ENSG00000174749	FAM241A	protein_coding	176.745	-2.0353	0.903708	-2.25217	0.0243118	0.0524631	Non Significant
ENSG00000161179	YDJC	protein_coding	652.827	-2.03433	0.210867	-9.64747	5.0385e-22	5.26758e-21	Down Regulated in MdU1_PMA
ENSG00000140105	WARS1	protein_coding	4289.82	-2.03381	0.135355	-15.0258	4.97861e-51	1.38949e-49	Down Regulated in MdU1_PMA
ENSG00000085662	AKR1B1	protein_coding	1.06542	-2.03368	2.97194	-0.684293	0.49379	0.711209	Non Significant
ENSG00000285077	ARHGAP11B	protein_coding	238.505	-2.03303	0.294813	-6.89599	5.34896e-12	3.20189e-11	Down Regulated in MdU1_PMA
ENSG00000114529	C3orf52	protein_coding	10.5909	-2.0308	1.20923	-1.67941	0.093072	0.17531	Non Significant
ENSG00000141540	TTYH2	protein_coding	25.5348	-2.02956	0.369045	-5.49948	3.80918e-08	1.67898e-07	Down Regulated in MdU1_PMA
ENSG00000271447	MMP28	protein_coding	1.2159	-2.02744	2.36258	-0.858148	0.390811	0.594388	Non Significant
ENSG00000054179	ENTPD2	protein_coding	0.750391	-2.02664	4.27305	-0.474285	0.635297	0.850173	Non Significant
ENSG00000058804	NDC1	protein_coding	2018.92	-2.0265	0.1011	-20.0446	2.25115e-89	1.75073e-87	Down Regulated in MdU1_PMA
ENSG00000260643	ENSG00000260643	protein_coding	33.8209	-2.02604	0.319186	-6.34752	2.1882e-10	1.15646e-09	Down Regulated in MdU1_PMA
ENSG00000196553	CCDC196	protein_coding	0.543856	-2.02451	4.27169	-0.473937	0.635545	0.850447	Non Significant
ENSG00000126091	ST3GAL3	protein_coding	471.984	-2.02421	0.139417	-14.5191	9.17156e-48	2.34342e-46	Down Regulated in MdU1_PMA
ENSG00000046604	DSG2	protein_coding	0.697332	-2.02415	3.41296	-0.593078	0.553129	0.773791	Non Significant
ENSG00000236761	CTAGE9	protein_coding	0.362761	-2.02381	4.04672	-0.500111	0.616997	0.834392	Non Significant
ENSG00000164736	SOX17	protein_coding	1.11114	-2.02341	2.11602	-0.95623	0.338956	0.529099	Non Significant
ENSG00000171208	NETO2	protein_coding	597.313	-2.02241	0.179976	-11.2371	2.68057e-29	3.73534e-28	Down Regulated in MdU1_PMA
ENSG00000142675	CNKSR1	protein_coding	2.41176	-2.02238	1.36743	-1.47896	0.13915	0.249488	Non Significant
ENSG00000115593	SMYD1	protein_coding	1.14901	-2.01967	3.31251	-0.60971	0.542054	0.762657	Non Significant
ENSG00000124249	KCNK15	protein_coding	0.698995	-2.01936	4.2665	-0.473305	0.635995	0.850761	Non Significant
ENSG00000119547	ONECUT2	protein_coding	831.959	-2.01912	0.196599	-10.2702	9.5961e-25	1.12255e-23	Down Regulated in MdU1_PMA
ENSG00000277531	PNMA8C	protein_coding	0.747666	-2.01762	4.27317	-0.47216	0.636813	0.851507	Non Significant
ENSG00000165185	KIAA1958	protein_coding	903.478	-2.01582	0.255212	-7.89861	2.82041e-15	2.06529e-14	Down Regulated in MdU1_PMA
ENSG00000101751	POLI	protein_coding	440.956	-2.01558	0.152573	-13.2105	7.62656e-40	1.52191e-38	Down Regulated in MdU1_PMA
ENSG00000102053	ZC3H12B	protein_coding	75.4753	-2.01472	0.365503	-5.5122	3.5437e-08	1.56476e-07	Down Regulated in MdU1_PMA
ENSG00000127564	PKMYT1	protein_coding	479.991	-2.01387	0.206579	-9.74864	1.86958e-22	1.99058e-21	Down Regulated in MdU1_PMA
ENSG00000284820	ENSG00000284820	protein_coding	49.65	-2.01377	0.392029	-5.13678	2.79482e-07	1.14684e-06	Down Regulated in MdU1_PMA
ENSG00000154548	SRSF12	protein_coding	4.21652	-2.01364	1.11627	-1.80391	0.0712457	0.138357	Non Significant
ENSG00000162836	ACP6	protein_coding	0.745169	-2.01228	4.27348	-0.470876	0.63773	0.852289	Non Significant
ENSG00000148426	PROSER2	protein_coding	136.917	-2.01208	0.233392	-8.62103	6.63545e-18	5.61062e-17	Down Regulated in MdU1_PMA
ENSG00000146477	SLC22A3	protein_coding	0.696496	-2.01187	4.27326	-0.470803	0.637781	0.852289	Non Significant
ENSG00000255181	CCDC166	protein_coding	0.824675	-2.01178	3.14047	-0.640597	0.521785	0.741273	Non Significant
ENSG00000139618	BRCA2	protein_coding	911.218	-2.0107	0.242983	-8.27508	1.28371e-16	1.0193e-15	Down Regulated in MdU1_PMA
ENSG00000188486	H2AX	protein_coding	1465.02	-2.01063	0.155198	-12.9553	2.19261e-38	4.16427e-37	Down Regulated in MdU1_PMA
ENSG00000095209	TMEM38B	protein_coding	1412.31	-2.01007	0.126241	-15.9225	4.42396e-57	1.49307e-55	Down Regulated in MdU1_PMA
ENSG00000134291	TMEM106C	protein_coding	2598.09	-2.0098	0.144127	-13.9447	3.38835e-44	7.82503e-43	Down Regulated in MdU1_PMA
ENSG00000188620	HMX3	protein_coding	0.742879	-2.0098	4.2733	-0.470316	0.638129	0.85263	Non Significant
ENSG00000180251	SLC9A4	protein_coding	0.900553	-2.00941	1.96965	-1.02019	0.307638	0.488665	Non Significant
ENSG00000094916	CBX5	protein_coding	5322.73	-2.00861	0.142441	-14.1013	3.72715e-45	8.77217e-44	Down Regulated in MdU1_PMA
ENSG00000169933	FRMPD4	protein_coding	9.46041	-2.00811	1.45616	-1.37905	0.167881	0.293385	Non Significant
ENSG00000284690	CD300H	protein_coding	0.606202	-2.00785	2.02835	-0.989897	0.322224	0.507572	Non Significant
ENSG00000101892	ATP1B4	protein_coding	0.669181	-2.0069	4.27309	-0.469661	0.638598	0.85303	Non Significant
ENSG00000160957	RECQL4	protein_coding	1067.8	-2.00613	0.229674	-8.73469	2.44327e-18	2.13093e-17	Down Regulated in MdU1_PMA
ENSG00000167325	RRM1	protein_coding	2772.71	-2.00585	0.138077	-14.527	8.1719e-48	2.09363e-46	Down Regulated in MdU1_PMA
ENSG00000116117	PARD3B	protein_coding	1.19788	-2.00537	3.28804	-0.609898	0.541929	0.762569	Non Significant
ENSG00000104903	LYL1	protein_coding	2350.01	-2.00503	0.233142	-8.60003	7.96956e-18	6.70985e-17	Down Regulated in MdU1_PMA
ENSG00000028277	POU2F2	protein_coding	1592.58	-2.00436	0.207864	-9.64265	5.28085e-22	5.50933e-21	Down Regulated in MdU1_PMA
ENSG00000160838	LRRC71	protein_coding	0.898603	-2.00396	2.21735	-0.903764	0.36612	0.564206	Non Significant
ENSG00000183186	C2CD4C	protein_coding	0.753095	-2.00394	3.76051	-0.532891	0.594109	0.813649	Non Significant
ENSG00000148541	FAM13C	protein_coding	0.842809	-2.0039	4.27565	-0.468678	0.6393	0.853556	Non Significant
ENSG00000270806	C17orf50	protein_coding	0.956471	-2.00205	2.13582	-0.93737	0.348568	0.541526	Non Significant
ENSG00000117877	POLR1G	protein_coding	531.367	-2.00118	0.150069	-13.3351	1.44644e-40	2.98325e-39	Down Regulated in MdU1_PMA
ENSG00000118520	ARG1	protein_coding	1.26246	-2.00114	1.55654	-1.28563	0.198571	0.338539	Non Significant
ENSG00000256269	HMBS	protein_coding	519.434	-2.00098	0.191914	-10.4264	1.87821e-25	2.26167e-24	Down Regulated in MdU1_PMA
ENSG00000166451	CENPN	protein_coding	1180.64	-2.0009	0.14933	-13.3992	6.11243e-41	1.27133e-39	Down Regulated in MdU1_PMA
ENSG00000186399	GOLGA8R	protein_coding	2387.32	-1.99995	0.249607	-8.01239	1.12499e-15	8.42929e-15	Down Regulated in MdU1_PMA
ENSG00000225180	PVALEF	protein_coding	0.50789	-1.99921	3.59341	-0.556355	0.577969	0.798097	Non Significant
ENSG00000100427	MLC1	protein_coding	596.153	-1.99893	0.174352	-11.4649	1.97968e-30	2.89177e-29	Down Regulated in MdU1_PMA
ENSG00000108551	RASD1	protein_coding	3.06112	-1.99723	1.13254	-1.76349	0.0778171	0.149612	Non Significant
ENSG00000065371	ROPN1	protein_coding	0.600536	-1.99709	4.27601	-0.467045	0.640467	0.85442	Non Significant
ENSG00000109061	MYH1	protein_coding	0.896359	-1.99667	3.5666	-0.559826	0.575598	0.795831	Non Significant
ENSG00000145194	ECE2	protein_coding	2.78219	-1.99664	1.80233	-1.10782	0.267941	0.435164	Non Significant
ENSG00000164438	TLX3	protein_coding	0.346894	-1.99664	4.27319	-0.467248	0.640323	0.854343	Non Significant
ENSG00000113749	HRH2	protein_coding	960.174	-1.99657	0.147241	-13.5599	6.92693e-42	1.49609e-40	Down Regulated in MdU1_PMA
ENSG00000115604	IL18R1	protein_coding	1024.04	-1.99615	0.120797	-16.5248	2.43443e-61	9.05478e-60	Down Regulated in MdU1_PMA
ENSG00000142273	CBLC	protein_coding	0.503124	-1.99527	4.27588	-0.466633	0.640763	0.854756	Non Significant
ENSG00000175711	B3GNTL1	protein_coding	1008.8	-1.99331	0.169238	-11.7782	5.05799e-32	7.76902e-31	Down Regulated in MdU1_PMA
ENSG00000184347	SLIT3	protein_coding	1.81846	-1.99328	2.81889	-0.707115	0.479495	0.696019	Non Significant
ENSG00000155974	GRIP1	protein_coding	192.02	-1.99314	0.289687	-6.8803	5.97256e-12	3.55894e-11	Down Regulated in MdU1_PMA
ENSG00000145824	CXCL14	protein_coding	0.787193	-1.9919	3.71176	-0.536645	0.591513	0.811336	Non Significant
ENSG00000241404	EGFL8	protein_coding	80.459	-1.99149	0.392344	-5.07588	3.85712e-07	1.55901e-06	Down Regulated in MdU1_PMA
ENSG00000140955	ADAD2	protein_coding	0.432309	-1.99119	4.27108	-0.466203	0.64107	0.854995	Non Significant
ENSG00000183571	PGPEP1L	protein_coding	0.494365	-1.99051	4.27457	-0.465663	0.641456	0.855382	Non Significant
ENSG00000171723	GPHN	protein_coding	92.9084	-1.99042	0.387563	-5.13574	2.8103e-07	1.15295e-06	Down Regulated in MdU1_PMA
ENSG00000188000	OR7D2	protein_coding	8.84999	-1.99015	0.684631	-2.9069	0.00365032	0.0091251	Down Regulated in MdU1_PMA
ENSG00000129152	MYOD1	protein_coding	0.668944	-1.98999	4.27338	-0.465672	0.64145	0.855382	Non Significant
ENSG00000116396	KCNC4	protein_coding	321.113	-1.98813	0.157669	-12.6095	1.87096e-36	3.32848e-35	Down Regulated in MdU1_PMA
ENSG00000137103	TMEM8B	protein_coding	59.7587	-1.98736	0.421333	-4.71684	2.39535e-06	8.96536e-06	Down Regulated in MdU1_PMA
ENSG00000077348	EXOSC5	protein_coding	576.869	-1.98703	0.240266	-8.27011	1.33838e-16	1.06185e-15	Down Regulated in MdU1_PMA
ENSG00000133641	C12orf29	protein_coding	619.816	-1.98687	0.175471	-11.323	1.00912e-29	1.43154e-28	Down Regulated in MdU1_PMA
ENSG00000149136	SSRP1	protein_coding	6325.17	-1.98628	0.073912	-26.8735	4.47726e-159	1.54552e-156	Down Regulated in MdU1_PMA
ENSG00000188162	OTOG	protein_coding	1.06596	-1.98382	2.92123	-0.679105	0.497072	0.715149	Non Significant
ENSG00000112715	VEGFA	protein_coding	3046.69	-1.98377	0.198891	-9.97413	1.9782e-23	2.19038e-22	Down Regulated in MdU1_PMA
ENSG00000136943	CTSV	protein_coding	25.2406	-1.98316	0.393314	-5.04218	4.60262e-07	1.84555e-06	Down Regulated in MdU1_PMA
ENSG00000168658	VWA3B	protein_coding	5.23253	-1.98258	1.10145	-1.79997	0.0718647	0.139339	Non Significant
ENSG00000125144	MT1G	protein_coding	383.938	-1.9818	0.282915	-7.00493	2.47114e-12	1.51188e-11	Down Regulated in MdU1_PMA
ENSG00000050820	BCAR1	protein_coding	2.83347	-1.98141	1.74452	-1.13579	0.256044	0.419094	Non Significant
ENSG00000244219	TMEM225B	protein_coding	89.1491	-1.98127	0.259797	-7.62622	2.4173e-14	1.68067e-13	Down Regulated in MdU1_PMA
ENSG00000178752	ERFE	protein_coding	85.7659	-1.97989	0.271194	-7.30067	2.86346e-13	1.85822e-12	Down Regulated in MdU1_PMA
ENSG00000175536	LIPT2	protein_coding	54.7572	-1.97956	0.296307	-6.68076	2.37705e-11	1.35489e-10	Down Regulated in MdU1_PMA
ENSG00000164379	FOXQ1	protein_coding	0.738625	-1.97807	3.77495	-0.523997	0.60028	0.818909	Non Significant
ENSG00000141314	RHBDL3	protein_coding	19.2129	-1.97669	0.899252	-2.19814	0.0279388	0.0595971	Non Significant
ENSG00000136718	IMP4	protein_coding	1365.69	-1.97613	0.198944	-9.93309	2.98844e-23	3.28494e-22	Down Regulated in MdU1_PMA
ENSG00000161996	WDR90	protein_coding	314.69	-1.97602	0.314595	-6.28115	3.36082e-10	1.75219e-09	Down Regulated in MdU1_PMA
ENSG00000116120	FARSB	protein_coding	995.138	-1.97543	0.16714	-11.819	3.11273e-32	4.80361e-31	Down Regulated in MdU1_PMA
ENSG00000158220	ESYT3	protein_coding	22.1136	-1.97535	0.38621	-5.11471	3.14218e-07	1.28189e-06	Down Regulated in MdU1_PMA
ENSG00000227124	ZNF717	protein_coding	33.674	-1.97421	1.14234	-1.72821	0.0839503	0.160028	Non Significant
ENSG00000196277	GRM7	protein_coding	0.677978	-1.97373	3.87017	-0.509985	0.610062	0.827947	Non Significant
ENSG00000145861	C1QTNF2	protein_coding	0.700257	-1.97363	3.84042	-0.513911	0.607315	0.824973	Non Significant
ENSG00000131016	AKAP12	protein_coding	2.01955	-1.97296	1.41917	-1.39022	0.164463	0.288102	Non Significant
ENSG00000197961	ZNF121	protein_coding	1254.1	-1.97272	0.165863	-11.8936	1.27732e-32	1.98992e-31	Down Regulated in MdU1_PMA
ENSG00000077514	POLD3	protein_coding	735.211	-1.97243	0.14567	-13.5404	9.03069e-42	1.94407e-40	Down Regulated in MdU1_PMA
ENSG00000168765	GSTM4	protein_coding	45.9551	-1.97132	1.06113	-1.85775	0.0632041	0.12446	Non Significant
ENSG00000160182	TFF1	protein_coding	0.218921	-1.97122	4.27141	-0.461491	0.644446	0.857809	Non Significant
ENSG00000168631	MUCL3	protein_coding	0.544199	-1.97107	4.13859	-0.476267	0.633884	0.848976	Non Significant
ENSG00000153898	MCOLN2	protein_coding	0.410016	-1.9699	4.27327	-0.460982	0.644812	0.85817	Non Significant
ENSG00000163993	S100P	protein_coding	928.305	-1.96926	0.308039	-6.39289	1.62784e-10	8.69654e-10	Down Regulated in MdU1_PMA
[truncated: 18,459 more rows]

## Sheet: MdU937_PMA_vs_MdU937_DMSO
ID	GeneName	BioType	baseMean	log2FoldChange	lfcSE	stat	pvalue	padj	Significance
ENSG00000167861	HID1	protein_coding	1.95312	-32.2615	3.35433	-9.61789	6.7198e-22	5.46359e-20	Down Regulated in U937_PMA
ENSG00000101134	DOK5	protein_coding	1.02965	-27.2418	4.24643	-6.41522	1.4062e-10	3.52015e-09	Down Regulated in U937_PMA
ENSG00000122852	SFTPA1	protein_coding	1.11015	-23.8913	4.24722	-5.62515	1.85345e-08	3.23e-07	Down Regulated in U937_PMA
ENSG00000170959	DCDC1	protein_coding	4.8628	-20.5623	4.18759	-4.91028	9.09453e-07	1.1405e-05	Down Regulated in U937_PMA
ENSG00000162493	PDPN	protein_coding	0.799813	-19.8316	4.19091	-4.73206	2.22251e-06	2.56108e-05	Down Regulated in U937_PMA
ENSG00000101542	CDH20	protein_coding	4.36033	-19.7795	4.20431	-4.70458	2.5439e-06	2.88994e-05	Down Regulated in U937_PMA
ENSG00000215568	GAB4	protein_coding	0.799893	-19.7152	4.18093	-4.7155	2.41119e-06	2.75189e-05	Down Regulated in U937_PMA
ENSG00000185306	C12orf56	protein_coding	0.977859	-19.5413	4.24722	-4.60097	4.20536e-06	4.57153e-05	Down Regulated in U937_PMA
ENSG00000187033	SAMD7	protein_coding	0.75728	-19.0336	4.20111	-4.53062	5.88121e-06	6.16508e-05	Down Regulated in U937_PMA
ENSG00000197124	ZNF682	protein_coding	0.740354	-18.5621	4.19621	-4.42354	9.70949e-06	9.67311e-05	Down Regulated in U937_PMA
ENSG00000138100	TRIM54	protein_coding	7.33293	-18.2929	1.44054	-12.6987	6.01404e-37	1.51708e-34	Down Regulated in U937_PMA
ENSG00000214940	NPIPA8	protein_coding	57.6988	-18.1519	1.62369	-11.1794	5.1429e-29	7.22798e-27	Down Regulated in U937_PMA
ENSG00000146151	HMGCLL1	protein_coding	0.496751	-17.9416	4.21731	-4.25429	2.09718e-05	0.000192104	Down Regulated in U937_PMA
ENSG00000112936	C7	protein_coding	1.59281	-17.8032	2.42195	-7.35077	1.97061e-13	7.261e-12	Down Regulated in U937_PMA
ENSG00000110148	CCKBR	protein_coding	3.34628	-17.7823	4.24257	-4.19139	2.77248e-05	0.000246727	Down Regulated in U937_PMA
ENSG00000226807	MROH5	protein_coding	0.634372	-17.6201	4.23768	-4.15795	3.21111e-05	0.000281058	Down Regulated in U937_PMA
ENSG00000130528	HRC	protein_coding	1.40761	-17.5991	1.8337	-9.59757	8.18487e-22	6.62738e-20	Down Regulated in U937_PMA
ENSG00000170537	TMC7	protein_coding	1.31572	-17.5561	2.0869	-8.41254	4.0122e-17	2.17477e-15	Down Regulated in U937_PMA
ENSG00000159337	PLA2G4D	protein_coding	1.00872	-17.377	4.24684	-4.09176	4.28115e-05	0.000360908	Down Regulated in U937_PMA
ENSG00000184867	ARMCX2	protein_coding	1.65315	-17.11	3.51385	-4.86929	1.12e-06	1.37643e-05	Down Regulated in U937_PMA
ENSG00000163295	ALPI	protein_coding	0.818483	-16.9742	4.24722	-3.99654	6.42753e-05	0.000517252	Down Regulated in U937_PMA
ENSG00000167414	GNG8	protein_coding	0.6486	-16.9242	3.64747	-4.63999	3.4842e-06	3.84062e-05	Down Regulated in U937_PMA
ENSG00000204347	BTBD17	protein_coding	2.04646	-16.7676	2.18385	-7.678	1.61595e-14	6.82305e-13	Down Regulated in U937_PMA
ENSG00000187527	ATP13A5	protein_coding	0.486069	-16.764	4.24113	-3.95271	7.72715e-05	0.000607672	Down Regulated in U937_PMA
ENSG00000109501	WFS1	protein_coding	2.21052	-16.7253	2.5233	-6.62835	3.39451e-11	9.19977e-10	Down Regulated in U937_PMA
ENSG00000163283	ALPP	protein_coding	0.612283	-16.7153	4.02731	-4.15049	3.31766e-05	0.000288842	Down Regulated in U937_PMA
ENSG00000153303	FRMD1	protein_coding	2.33406	-16.707	4.24457	-3.93609	8.2821e-05	0.000645892	Down Regulated in U937_PMA
ENSG00000144331	ZNF385B	protein_coding	1.14024	-16.6021	4.24722	-3.90892	9.27093e-05	0.000712795	Down Regulated in U937_PMA
ENSG00000279686	ENSG00000279686	protein_coding	0.481179	-16.5877	3.82963	-4.33141	1.48156e-05	0.000140691	Down Regulated in U937_PMA
ENSG00000130829	DUSP9	protein_coding	1.28194	-16.5668	4.24722	-3.90062	9.5945e-05	0.000733986	Down Regulated in U937_PMA
ENSG00000139304	PTPRQ	protein_coding	0.911925	-16.5116	4.17332	-3.95647	7.60641e-05	0.000599614	Down Regulated in U937_PMA
ENSG00000166211	SPIC	protein_coding	0.690868	-16.3937	4.24722	-3.85986	0.00011345	0.000846189	Down Regulated in U937_PMA
ENSG00000105137	SYDE1	protein_coding	1.55056	-16.3315	3.64239	-4.48374	7.33455e-06	7.52815e-05	Down Regulated in U937_PMA
ENSG00000166206	GABRB3	protein_coding	2.51461	-16.2933	4.23546	-3.84689	0.000119626	0.000885869	Down Regulated in U937_PMA
ENSG00000149654	CDH22	protein_coding	10.7578	-16.2129	1.30795	-12.3957	2.75861e-35	5.96466e-33	Down Regulated in U937_PMA
ENSG00000136918	WDR38	protein_coding	0.329125	-16.1234	4.24722	-3.79622	0.000146919	0.00106318	Down Regulated in U937_PMA
ENSG00000205978	NYNRIN	protein_coding	13.6158	-16.1205	2.33526	-6.9031	5.08804e-12	1.57409e-10	Down Regulated in U937_PMA
ENSG00000091181	IL5RA	protein_coding	1.35874	-16.0935	2.75531	-5.8409	5.19202e-09	1.00451e-07	Down Regulated in U937_PMA
ENSG00000215397	SCRT2	protein_coding	1.10773	-16.0498	2.70338	-5.93694	2.90388e-09	5.90867e-08	Down Regulated in U937_PMA
ENSG00000142661	MYOM3	protein_coding	2.27242	-15.8052	2.45683	-6.43318	1.24958e-10	3.16841e-09	Down Regulated in U937_PMA
ENSG00000197901	SLC22A6	protein_coding	0.269857	-15.7719	4.24722	-3.71347	0.000204435	0.00142438	Down Regulated in U937_PMA
ENSG00000139508	SLC46A3	protein_coding	0.529201	-15.7614	3.66649	-4.29877	1.71749e-05	0.000160463	Down Regulated in U937_PMA
ENSG00000152779	SLC16A12	protein_coding	1.59188	-15.7576	3.12001	-5.05049	4.40687e-07	5.87388e-06	Down Regulated in U937_PMA
ENSG00000278685	IQCA1L	protein_coding	0.481016	-15.7255	4.24722	-3.70255	0.000213447	0.00147932	Down Regulated in U937_PMA
ENSG00000075891	PAX2	protein_coding	5.16898	-15.6105	1.51959	-10.2728	9.34564e-25	9.99373e-23	Down Regulated in U937_PMA
ENSG00000237330	RNF223	protein_coding	0.536636	-15.5269	4.18495	-3.71019	0.000207105	0.00144196	Down Regulated in U937_PMA
ENSG00000206260	PRR23A	protein_coding	0.53607	-15.386	4.17774	-3.68286	0.000230629	0.00158334	Down Regulated in U937_PMA
ENSG00000165566	AMER2	protein_coding	2.30932	-15.3857	2.08056	-7.39501	1.41399e-13	5.31962e-12	Down Regulated in U937_PMA
ENSG00000140481	CCDC33	protein_coding	1.03191	-15.2533	2.44592	-6.23624	4.48203e-10	1.04365e-08	Down Regulated in U937_PMA
ENSG00000134545	KLRC1	protein_coding	0.227629	-15.2404	4.24722	-3.58833	0.000332804	0.00218932	Down Regulated in U937_PMA
ENSG00000165887	ANKRD2	protein_coding	0.913103	-15.2045	2.68684	-5.65888	1.52365e-08	2.69598e-07	Down Regulated in U937_PMA
ENSG00000114349	GNAT1	protein_coding	5.1177	-15.0943	4.24722	-3.55392	0.000379533	0.00245971	Down Regulated in U937_PMA
ENSG00000183396	TMEM89	protein_coding	0.330513	-15.0714	4.01808	-3.75089	0.000176209	0.0012467	Down Regulated in U937_PMA
ENSG00000169583	CLIC3	protein_coding	0.916824	-15.0663	2.83662	-5.31136	1.08812e-07	1.65327e-06	Down Regulated in U937_PMA
ENSG00000121446	RGSL1	protein_coding	0.876408	-15.0553	2.43554	-6.18153	6.34834e-10	1.43575e-08	Down Regulated in U937_PMA
ENSG00000179813	FAM216B	protein_coding	0.67714	-15.0539	2.06344	-7.29554	2.97454e-13	1.07785e-11	Down Regulated in U937_PMA
ENSG00000113578	FGF1	protein_coding	0.781966	-14.9193	3.2742	-4.55662	5.19829e-06	5.53172e-05	Down Regulated in U937_PMA
ENSG00000227051	C14orf132	protein_coding	7.1158	-14.8692	1.52056	-9.77877	1.38881e-22	1.2421e-20	Down Regulated in U937_PMA
ENSG00000117322	CR2	protein_coding	2.71253	-14.8624	4.24722	-3.49932	0.000466438	0.00297011	Down Regulated in U937_PMA
ENSG00000124440	HIF3A	protein_coding	3.62793	-14.702	4.24722	-3.46155	0.000537075	0.00337296	Down Regulated in U937_PMA
ENSG00000189184	PCDH18	protein_coding	0.567645	-14.5924	3.56104	-4.09778	4.1713e-05	0.000353313	Down Regulated in U937_PMA
ENSG00000168928	CTRB2	protein_coding	1.02964	-14.4153	3.18927	-4.51992	6.18627e-06	6.44368e-05	Down Regulated in U937_PMA
ENSG00000144451	SPAG16	protein_coding	2.71703	-14.4066	1.70507	-8.44931	2.9302e-17	1.61047e-15	Down Regulated in U937_PMA
ENSG00000164237	CMBL	protein_coding	0.9641	-14.3965	3.71778	-3.87234	0.000107796	0.00080923	Down Regulated in U937_PMA
ENSG00000164116	GUCY1A1	protein_coding	20.8878	-14.3333	1.37742	-10.4059	2.33084e-25	2.70323e-23	Down Regulated in U937_PMA
ENSG00000102678	FGF9	protein_coding	1.11123	-14.2867	3.9318	-3.63364	0.000279455	0.00187345	Down Regulated in U937_PMA
ENSG00000137869	CYP19A1	protein_coding	19.2065	-14.2731	1.4271	-10.0015	1.5009e-23	1.46031e-21	Down Regulated in U937_PMA
ENSG00000155254	MARVELD1	protein_coding	0.731455	-14.0923	2.64891	-5.32002	1.03753e-07	1.58129e-06	Down Regulated in U937_PMA
ENSG00000167555	ZNF528	protein_coding	0.857008	-13.8313	4.24722	-3.25655	0.00112776	0.00635267	Down Regulated in U937_PMA
ENSG00000106078	COBL	protein_coding	1.70537	-13.8016	3.48538	-3.95986	7.49932e-05	0.000592597	Down Regulated in U937_PMA
ENSG00000115705	TPO	protein_coding	2.43721	-13.5344	4.24722	-3.18665	0.0014393	0.0078951	Down Regulated in U937_PMA
ENSG00000281887	GIMAP1-GIMAP5	protein_coding	6.38028	-6.72677	3.66082	-1.8375	0.0661359	0.191113	Non Significant
ENSG00000283515	ENSG00000283515	protein_coding	28.8583	-5.66737	1.15499	-4.90686	9.25459e-07	1.15541e-05	Down Regulated in U937_PMA
ENSG00000171116	HSFX1	protein_coding	2.90373	-5.60926	2.56409	-2.18762	0.028697	0.0976215	Non Significant
ENSG00000182885	ADGRG3	protein_coding	76.8136	-5.39092	0.368303	-14.6372	1.62632e-48	6.66656e-46	Down Regulated in U937_PMA
ENSG00000267228	ENSG00000267228	protein_coding	5.57804	-5.38347	4.0637	-1.32477	0.185248	0.418786	Non Significant
ENSG00000140478	GOLGA6D	protein_coding	3.86464	-5.30339	1.23273	-4.30216	1.69143e-05	0.000158328	Down Regulated in U937_PMA
ENSG00000180777	ANKRD30B	protein_coding	2.6523	-5.15668	4.17842	-1.23412	0.217158	0.470262	Non Significant
ENSG00000130707	ASS1	protein_coding	2376.73	-4.79183	0.232751	-20.5878	3.53218e-94	6.94992e-91	Down Regulated in U937_PMA
ENSG00000172000	ZNF556	protein_coding	3.45687	-4.70242	1.23282	-3.81435	0.000136542	0.000995038	Down Regulated in U937_PMA
ENSG00000175414	ARL10	protein_coding	13.0001	-4.62368	1.55622	-2.97109	0.00296745	0.0147072	Down Regulated in U937_PMA
ENSG00000289746	TARP	protein_coding	53.0397	-4.62226	0.923962	-5.00265	5.65482e-07	7.40281e-06	Down Regulated in U937_PMA
ENSG00000214050	FBXO16	protein_coding	1.41561	-4.57582	2.84359	-1.60917	0.107579	0.277932	Non Significant
ENSG00000128242	GAL3ST1	protein_coding	3.95939	-4.51409	1.25546	-3.59556	0.000323692	0.00213795	Down Regulated in U937_PMA
ENSG00000145147	SLIT2	protein_coding	2.8108	-4.46069	1.77227	-2.51694	0.0118378	0.0473899	Down Regulated in U937_PMA
ENSG00000039068	CDH1	protein_coding	1.89603	-4.38751	2.86481	-1.53152	0.125642	0.312306	Non Significant
ENSG00000204421	LY6G6C	protein_coding	1.57602	-4.32223	1.70669	-2.53253	0.0113244	0.0456502	Down Regulated in U937_PMA
ENSG00000072182	ASIC4	protein_coding	2.89764	-4.30139	1.21697	-3.53452	0.000408519	0.00262938	Down Regulated in U937_PMA
ENSG00000067445	TRO	protein_coding	3.45894	-4.28113	1.71803	-2.49189	0.0127067	0.0502546	Non Significant
ENSG00000284934	ENSG00000284934	protein_coding	1.43194	-4.23208	2.28544	-1.85176	0.0640609	0.186708	Non Significant
ENSG00000285920	ENSG00000285920	protein_coding	14.5002	-4.19225	1.98041	-2.11686	0.0342719	0.112633	Non Significant
ENSG00000126500	FLRT1	protein_coding	227.723	-4.11955	0.311141	-13.2401	5.14529e-40	1.58185e-37	Down Regulated in U937_PMA
ENSG00000283697	HSFX3	protein_coding	2.47253	-3.99537	2.07841	-1.92232	0.0545653	0.163863	Non Significant
ENSG00000141934	PLPP2	protein_coding	11.8728	-3.97936	0.849448	-4.68465	2.80442e-06	3.15854e-05	Down Regulated in U937_PMA
ENSG00000122756	CNTFR	protein_coding	3.14818	-3.92393	1.31576	-2.98224	0.00286148	0.0142466	Down Regulated in U937_PMA
ENSG00000095585	BLNK	protein_coding	11.1246	-3.92235	0.79477	-4.93519	8.00708e-07	1.01382e-05	Down Regulated in U937_PMA
ENSG00000171124	FUT3	protein_coding	2.5	-3.84397	1.27095	-3.02448	0.0024906	0.0126759	Down Regulated in U937_PMA
ENSG00000288622	PDCD6-AHRR	protein_coding	16.8829	-3.79731	1.76396	-2.15272	0.0313406	0.104911	Non Significant
ENSG00000139973	SYT16	protein_coding	3.04116	-3.75505	4.20196	-0.893644	0.371512	0.687019	Non Significant
ENSG00000221923	ZNF880	protein_coding	0.908692	-3.75286	3.08181	-1.21775	0.22332	0.479647	Non Significant
ENSG00000005381	MPO	protein_coding	12781.5	-3.72873	0.188671	-19.7631	6.18695e-87	1.01445e-83	Down Regulated in U937_PMA
ENSG00000256861	ENSG00000256861	protein_coding	0.620853	-3.72429	4.18099	-0.890768	0.373054	0.688869	Non Significant
ENSG00000116661	FBXO2	protein_coding	3.32423	-3.70236	1.24927	-2.96362	0.00304047	0.0150124	Down Regulated in U937_PMA
ENSG00000157060	SHCBP1L	protein_coding	3.13157	-3.68833	2.49079	-1.48079	0.138664	0.3365	Non Significant
ENSG00000255872	ENSG00000255872	protein_coding	2.97929	-3.68321	2.50874	-1.46815	0.142063	0.342721	Non Significant
ENSG00000267618	ENSG00000267618	protein_coding	3.12092	-3.67692	1.87254	-1.9636	0.0495767	0.151659	Non Significant
ENSG00000285976	ENSG00000285976	protein_coding	67.5876	-3.6652	1.76871	-2.07225	0.0382425	0.123253	Non Significant
ENSG00000112902	SEMA5A	protein_coding	2.18173	-3.66083	2.12471	-1.72297	0.0848932	0.23222	Non Significant
ENSG00000085265	FCN1	protein_coding	31.096	-3.65661	0.958319	-3.81565	0.000135823	0.0009909	Down Regulated in U937_PMA
ENSG00000103154	NECAB2	protein_coding	4.1093	-3.65259	1.37922	-2.6483	0.00808976	0.0345655	Down Regulated in U937_PMA
ENSG00000172037	LAMB2	protein_coding	4.96934	-3.61875	1.13631	-3.18465	0.0014493	0.00793962	Down Regulated in U937_PMA
ENSG00000167858	TEKT1	protein_coding	2.69289	-3.58899	1.3869	-2.58778	0.00965959	0.0401059	Down Regulated in U937_PMA
ENSG00000269307	ENSG00000269307	protein_coding	1.11435	-3.55578	3.87195	-0.918344	0.358439	0.66983	Non Significant
ENSG00000145864	GABRB2	protein_coding	3.3864	-3.53664	1.51408	-2.33584	0.0194996	0.0714744	Non Significant
ENSG00000106571	GLI3	protein_coding	140.552	-3.50967	1.10799	-3.16761	0.00153698	0.00834117	Down Regulated in U937_PMA
ENSG00000248871	TNFSF12-TNFSF13	protein_coding	0.937179	-3.49801	4.18378	-0.836089	0.403105	0.722753	Non Significant
ENSG00000183876	ARSI	protein_coding	2.19975	-3.49011	2.0135	-1.73335	0.0830327	0.228465	Non Significant
ENSG00000284976	ENSG00000284976	protein_coding	40.4674	-3.47856	1.68332	-2.06648	0.038783	0.124607	Non Significant
ENSG00000101890	GUCY2F	protein_coding	4.60447	-3.45876	1.15444	-2.99604	0.00273514	0.0137214	Down Regulated in U937_PMA
ENSG00000174233	ADCY6	protein_coding	8.56108	-3.45857	0.754883	-4.58159	4.6145e-06	4.95335e-05	Down Regulated in U937_PMA
ENSG00000244411	KRTAP5-7	protein_coding	1.77123	-3.45793	1.42796	-2.4216	0.0154524	0.0588885	Non Significant
ENSG00000189190	ZNF600	protein_coding	1.03267	-3.44621	2.66867	-1.29136	0.196579	0.436656	Non Significant
ENSG00000106714	CNTNAP3	protein_coding	10.5784	-3.43843	1.34463	-2.55716	0.0105532	0.0431067	Down Regulated in U937_PMA
ENSG00000112164	GLP1R	protein_coding	9.24384	-3.43088	1.10257	-3.1117	0.00186011	0.00984386	Down Regulated in U937_PMA
ENSG00000163914	RHO	protein_coding	1.31398	-3.4018	1.91306	-1.7782	0.0753718	0.211437	Non Significant
ENSG00000198576	ARC	protein_coding	3.22823	-3.37245	1.23384	-2.73328	0.00627062	0.0278135	Down Regulated in U937_PMA
ENSG00000261341	ENSG00000261341	protein_coding	1.23127	-3.35979	1.33861	-2.50991	0.0120763	0.0481778	Down Regulated in U937_PMA
ENSG00000269026	ENSG00000269026	protein_coding	2.51318	-3.35821	1.24056	-2.707	0.00678934	0.0297786	Down Regulated in U937_PMA
ENSG00000148735	PLEKHS1	protein_coding	3.19928	-3.35657	1.27803	-2.62637	0.00863022	0.03651	Down Regulated in U937_PMA
ENSG00000177511	ST8SIA3	protein_coding	16.2256	-3.35344	0.488924	-6.85882	6.94303e-12	2.11472e-10	Down Regulated in U937_PMA
ENSG00000170954	ZNF415	protein_coding	1.077	-3.33271	3.53824	-0.941913	0.346237	0.654111	Non Significant
ENSG00000258677	ENSG00000258677	protein_coding	6.19242	-3.32201	3.4549	-0.961535	0.336283	0.641527	Non Significant
ENSG00000015520	NPC1L1	protein_coding	3.62336	-3.31585	1.17832	-2.81405	0.00489212	0.0225006	Down Regulated in U937_PMA
ENSG00000124557	BTN1A1	protein_coding	2.09568	-3.29589	1.30303	-2.5294	0.0114259	0.0460122	Down Regulated in U937_PMA
ENSG00000101955	SRPX	protein_coding	125.604	-3.27441	0.920664	-3.55658	0.000375715	0.00243979	Down Regulated in U937_PMA
ENSG00000130226	DPP6	protein_coding	9.78211	-3.27191	3.06399	-1.06786	0.285583	0.570875	Non Significant
ENSG00000130383	FUT5	protein_coding	4.21621	-3.26042	1.33121	-2.44921	0.0143168	0.0553499	Non Significant
ENSG00000103723	AP3B2	protein_coding	5.2467	-3.25704	2.92213	-1.11461	0.265017	0.540845	Non Significant
ENSG00000066629	EML1	protein_coding	15.1979	-3.23807	1.2087	-2.67898	0.00738479	0.0320404	Down Regulated in U937_PMA
ENSG00000183654	MARCHF11	protein_coding	1.55222	-3.22851	1.36693	-2.36186	0.0181833	0.0675175	Non Significant
ENSG00000170293	CMTM8	protein_coding	20.8192	-3.22385	1.00296	-3.21433	0.00130747	0.00725488	Down Regulated in U937_PMA
ENSG00000105392	CRX	protein_coding	1.21637	-3.21442	1.89702	-1.69446	0.0901788	0.24363	Non Significant
ENSG00000272305	ENSG00000272305	protein_coding	1.68621	-3.18875	1.44561	-2.20582	0.0273965	0.0941249	Non Significant
ENSG00000211724	TRBV6-6	TR_V_gene	3.67073	-3.17109	0.85045	-3.72872	0.000192456	0.00135001	Down Regulated in U937_PMA
ENSG00000179002	TAS1R2	protein_coding	1.63516	-3.12852	1.96538	-1.59181	0.111427	0.285883	Non Significant
ENSG00000165935	SMCO2	protein_coding	2.94877	-3.12545	1.08914	-2.86964	0.00410939	0.0194133	Down Regulated in U937_PMA
ENSG00000187682	ERAS	protein_coding	1.25322	-3.12021	1.8806	-1.65915	0.0970847	0.257688	Non Significant
ENSG00000128482	RNF112	protein_coding	12.3772	-3.11137	0.925538	-3.36169	0.000774675	0.00461754	Down Regulated in U937_PMA
ENSG00000211448	DIO2	protein_coding	3.27685	-3.07064	1.08038	-2.84219	0.00448044	0.0209002	Down Regulated in U937_PMA
ENSG00000112715	VEGFA	protein_coding	3046.69	-3.07004	0.196522	-15.6219	5.16703e-55	2.74774e-52	Down Regulated in U937_PMA
ENSG00000140279	DUOX2	protein_coding	4.41338	-3.04014	1.13412	-2.68062	0.00734864	0.0318976	Down Regulated in U937_PMA
ENSG00000221874	ZNF816-ZNF321P	protein_coding	3.99306	-3.04003	1.28211	-2.37111	0.0177349	0.0660519	Non Significant
ENSG00000187997	C17orf99	protein_coding	3.60305	-3.03567	1.22837	-2.47131	0.013462	0.0527227	Non Significant
ENSG00000135100	HNF1A	protein_coding	2.79369	-3.01019	1.30708	-2.30299	0.0212792	0.0766033	Non Significant
ENSG00000187862	TTC24	protein_coding	1.18949	-3.00663	1.74968	-1.71839	0.0857253	0.234138	Non Significant
ENSG00000278195	SSTR3	protein_coding	41.0371	-3.00539	0.596532	-5.03811	4.70158e-07	6.23371e-06	Down Regulated in U937_PMA
ENSG00000139352	ASCL1	protein_coding	1.63977	-2.97364	2.38599	-1.24629	0.212658	0.462451	Non Significant
ENSG00000183287	CCBE1	protein_coding	5.77534	-2.96565	0.796472	-3.72348	0.000196497	0.00137688	Down Regulated in U937_PMA
ENSG00000101470	TNNC2	protein_coding	2.36179	-2.96533	1.27282	-2.32974	0.0198201	0.0723793	Non Significant
ENSG00000243710	CFAP57	protein_coding	3.27234	-2.95992	1.28847	-2.29724	0.0216051	0.0775026	Non Significant
ENSG00000136449	MYCBPAP	protein_coding	2.85298	-2.9599	1.54525	-1.91549	0.0554305	0.165803	Non Significant
ENSG00000188000	OR7D2	protein_coding	8.84999	-2.9535	0.536329	-5.50688	3.65244e-08	6.08513e-07	Down Regulated in U937_PMA
ENSG00000141441	GAREM1	protein_coding	3.24223	-2.92759	1.50921	-1.93982	0.0524015	0.158751	Non Significant
ENSG00000272968	RBAK-RBAKDN	protein_coding	17.1764	-2.92138	0.380955	-7.66858	1.7391e-14	7.29605e-13	Down Regulated in U937_PMA
ENSG00000133433	GSTT2B	protein_coding	0.529171	-2.91206	2.64914	-1.09925	0.27166	0.550506	Non Significant
ENSG00000174332	GLIS1	protein_coding	11.8749	-2.8957	0.44008	-6.57993	4.70677e-11	1.25659e-09	Down Regulated in U937_PMA
ENSG00000186642	PDE2A	protein_coding	10.7103	-2.8918	1.1491	-2.51657	0.0118503	0.047421	Down Regulated in U937_PMA
ENSG00000168453	HR	protein_coding	3.4564	-2.88428	1.3455	-2.14364	0.0320617	0.106869	Non Significant
ENSG00000157211	CDCP2	protein_coding	1.51436	-2.88386	2.0772	-1.38834	0.165035	0.384287	Non Significant
ENSG00000241233	KRTAP5-8	protein_coding	1.42378	-2.8818	1.36363	-2.11333	0.0345727	0.113413	Non Significant
ENSG00000213931	HBE1	protein_coding	0.372635	-2.87784	4.19771	-0.685573	0.492982	0.822585	Non Significant
ENSG00000180929	GPR62	protein_coding	4.97888	-2.87709	1.1162	-2.57759	0.00994928	0.0411186	Down Regulated in U937_PMA
ENSG00000258984	UBE2F-SCLY	protein_coding	10.6292	-2.86066	0.923183	-3.09869	0.00194376	0.0102315	Down Regulated in U937_PMA
ENSG00000248385	TARM1	protein_coding	0.519273	-2.85749	3.08817	-0.925302	0.354809	0.665068	Non Significant
ENSG00000174307	PHLDA3	protein_coding	9.7323	-2.85653	0.871462	-3.27785	0.001046	0.00594143	Down Regulated in U937_PMA
ENSG00000264187	ENSG00000264187	protein_coding	0.64995	-2.84778	2.46092	-1.1572	0.247191	0.515721	Non Significant
ENSG00000174792	ODAPH	protein_coding	2.15133	-2.84545	1.47384	-1.93064	0.0535276	0.16156	Non Significant
ENSG00000170231	FABP6	protein_coding	17.2405	-2.83736	0.627794	-4.51956	6.19673e-06	6.45116e-05	Down Regulated in U937_PMA
ENSG00000107447	DNTT	protein_coding	0.914637	-2.82684	2.04765	-1.38053	0.167423	0.388239	Non Significant
ENSG00000129474	AJUBA	protein_coding	366.258	-2.8239	0.166484	-16.962	1.56962e-64	1.18784e-61	Down Regulated in U937_PMA
ENSG00000260272	ENSG00000260272	protein_coding	26.2375	-2.81775	0.952508	-2.95825	0.00309394	0.0152496	Down Regulated in U937_PMA
ENSG00000173947	PIFO	protein_coding	1.56789	-2.80507	1.66656	-1.68315	0.0923461	0.248123	Non Significant
ENSG00000198930	CSAG1	protein_coding	1.04993	-2.79543	2.1185	-1.31953	0.18699	0.421398	Non Significant
ENSG00000131152	ENSG00000131152	protein_coding	12.5216	-2.78828	0.625112	-4.46045	8.17888e-06	8.29524e-05	Down Regulated in U937_PMA
ENSG00000182218	HHIPL1	protein_coding	28.4687	-2.78553	0.436421	-6.38265	1.74045e-10	4.30756e-09	Down Regulated in U937_PMA
ENSG00000114115	RBP1	protein_coding	0.881042	-2.77611	2.73511	-1.01499	0.310112	0.606982	Non Significant
ENSG00000137648	TMPRSS4	protein_coding	4.8207	-2.77216	1.78945	-1.54917	0.12134	0.304023	Non Significant
ENSG00000137270	GCM1	protein_coding	6.85989	-2.77045	0.835864	-3.31448	0.000918139	0.00531959	Down Regulated in U937_PMA
ENSG00000204657	OR2H2	protein_coding	6.24922	-2.76614	0.893782	-3.09486	0.00196903	0.0103414	Down Regulated in U937_PMA
ENSG00000135925	WNT10A	protein_coding	9.34197	-2.76432	0.601658	-4.5945	4.3378e-06	4.68959e-05	Down Regulated in U937_PMA
ENSG00000263353	PPIAL4A	protein_coding	0.730677	-2.76347	2.08587	-1.32485	0.185221	0.418786	Non Significant
ENSG00000213402	PTPRCAP	protein_coding	1.85097	-2.75417	2.29193	-1.20168	0.229487	0.489315	Non Significant
ENSG00000174226	SNX31	protein_coding	1.39047	-2.75216	1.85996	-1.47969	0.138957	0.337092	Non Significant
ENSG00000204913	LRRC3C	protein_coding	1.05963	-2.75129	1.43576	-1.91626	0.0553323	0.165585	Non Significant
ENSG00000172969	FRG2C	protein_coding	0.484862	-2.74965	4.18768	-0.656603	0.511436	0.842375	Non Significant
ENSG00000260092	ENSG00000260092	protein_coding	1.89221	-2.74145	1.70088	-1.61178	0.10701	0.276897	Non Significant
ENSG00000285723	MKKS	protein_coding	0.32075	-2.73987	4.19627	-0.652931	0.513801	0.845138	Non Significant
ENSG00000185272	RBM11	protein_coding	0.406198	-2.73758	3.77173	-0.725816	0.467951	0.796912	Non Significant
ENSG00000137745	MMP13	protein_coding	1.03933	-2.73489	3.74432	-0.730409	0.46514	0.794215	Non Significant
ENSG00000181264	TLCD5	protein_coding	0.809867	-2.72678	2.31428	-1.17824	0.238701	0.503558	Non Significant
ENSG00000151640	DPYSL4	protein_coding	2.85548	-2.71851	1.56587	-1.7361	0.0825459	0.227348	Non Significant
ENSG00000170807	LMOD2	protein_coding	1.08402	-2.71672	1.96911	-1.37967	0.167688	0.388626	Non Significant
ENSG00000145198	VWA5B2	protein_coding	8.44374	-2.71437	0.686018	-3.9567	7.59909e-05	0.000599277	Down Regulated in U937_PMA
ENSG00000006555	TTC22	protein_coding	1.4707	-2.71235	1.81597	-1.49361	0.135278	0.330568	Non Significant
ENSG00000026559	KCNG1	protein_coding	4.31592	-2.69474	0.910033	-2.96115	0.00306492	0.0151179	Down Regulated in U937_PMA
ENSG00000109047	RCVRN	protein_coding	2.02087	-2.69397	1.27189	-2.11808	0.0341684	0.11233	Non Significant
ENSG00000124194	GDAP1L1	protein_coding	34.7437	-2.68624	0.924168	-2.90666	0.00365311	0.0175957	Down Regulated in U937_PMA
ENSG00000114805	PLCH1	protein_coding	2.38571	-2.68473	1.29101	-2.07956	0.0375657	0.121658	Non Significant
ENSG00000290147	ENSG00000290147	protein_coding	0.474607	-2.68164	4.20278	-0.638062	0.523433	0.853632	Non Significant
ENSG00000188263	IL17REL	protein_coding	1.09374	-2.67298	2.80911	-0.951539	0.341331	0.648265	Non Significant
ENSG00000186648	CARMIL3	protein_coding	1.88059	-2.63639	1.38289	-1.90643	0.0565948	0.168568	Non Significant
ENSG00000268193	ENSG00000268193	protein_coding	2.04136	-2.6231	1.53797	-1.70556	0.0880904	0.239038	Non Significant
ENSG00000279073	ENSG00000279073	protein_coding	2.27523	-2.61128	2.07742	-1.25698	0.208761	0.456702	Non Significant
ENSG00000188910	GJB3	protein_coding	1.70006	-2.5919	1.28754	-2.01307	0.0441076	0.138041	Non Significant
ENSG00000169194	IL13	protein_coding	2.24498	-2.58813	0.978268	-2.64562	0.00815408	0.0348025	Down Regulated in U937_PMA
ENSG00000256500	ENSG00000256500	protein_coding	18.3971	-2.58388	2.74295	-0.942006	0.346189	0.654086	Non Significant
ENSG00000160360	GPSM1	protein_coding	1.52755	-2.58179	2.2126	-1.16686	0.243266	0.510234	Non Significant
ENSG00000286165	ENSG00000286165	protein_coding	0.949091	-2.5801	2.66473	-0.968241	0.332924	0.637467	Non Significant
ENSG00000211747	TRBV20-1	TR_V_gene	0.510854	-2.57839	2.61456	-0.986166	0.324052	0.625839	Non Significant
ENSG00000137709	POU2F3	protein_coding	10.9605	-2.57468	0.753222	-3.41823	0.000630302	0.00387315	Down Regulated in U937_PMA
ENSG00000267360	ENSG00000267360	protein_coding	0.271787	-2.57189	4.21661	-0.609943	0.5419	0.87154	Non Significant
ENSG00000164930	FZD6	protein_coding	1.12447	-2.56565	1.81289	-1.41523	0.157001	0.370447	Non Significant
ENSG00000185960	SHOX	protein_coding	1.13713	-2.56472	2.16484	-1.18472	0.236129	0.499472	Non Significant
ENSG00000122863	CHST3	protein_coding	1.71651	-2.55947	2.52588	-1.0133	0.310918	0.608113	Non Significant
ENSG00000267221	C17orf113	protein_coding	1.03332	-2.54395	4.03456	-0.630539	0.528342	0.858436	Non Significant
ENSG00000149742	SLC22A9	protein_coding	0.451741	-2.54238	4.19984	-0.605351	0.544946	0.874274	Non Significant
ENSG00000116031	CD207	protein_coding	0.542438	-2.5401	3.05272	-0.832079	0.405364	0.725548	Non Significant
ENSG00000160396	HIPK4	protein_coding	2.75307	-2.53451	1.33984	-1.89165	0.0585377	0.173436	Non Significant
ENSG00000104413	ESRP1	protein_coding	1.77331	-2.53397	3.06305	-0.827269	0.408085	0.72909	Non Significant
ENSG00000268400	ENSG00000268400	protein_coding	6.61582	-2.52775	1.17724	-2.14719	0.0317782	0.106095	Non Significant
ENSG00000289747	ENSG00000289747	protein_coding	12.3074	-2.52488	1.17878	-2.14194	0.0321983	0.107233	Non Significant
ENSG00000253598	SLC10A5	protein_coding	0.702319	-2.51854	2.20421	-1.14261	0.253202	0.523876	Non Significant
ENSG00000185467	KPNA7	protein_coding	1.84172	-2.51093	1.4511	-1.73036	0.0835659	0.229573	Non Significant
ENSG00000248746	ACTN3	protein_coding	2.0656	-2.50892	1.51032	-1.66118	0.0966766	0.256984	Non Significant
ENSG00000272414	FAM47E-STBD1	protein_coding	0.402528	-2.50644	4.2035	-0.596274	0.550992	0.880049	Non Significant
ENSG00000141040	ZNF287	protein_coding	2.94726	-2.50375	1.18618	-2.11076	0.0347926	0.113983	Non Significant
ENSG00000164638	SLC29A4	protein_coding	192.231	-2.49838	0.552596	-4.52117	6.14975e-06	6.40903e-05	Down Regulated in U937_PMA
ENSG00000256029	ENSG00000256029	protein_coding	15.5071	-2.49009	0.939574	-2.65023	0.00804362	0.0343833	Down Regulated in U937_PMA
ENSG00000162398	LEXM	protein_coding	0.682111	-2.48157	2.9742	-0.834366	0.404075	0.723767	Non Significant
ENSG00000111319	SCNN1A	protein_coding	6.5319	-2.47563	1.13261	-2.18578	0.028832	0.0979621	Non Significant
ENSG00000197409	H3C4	protein_coding	4.00088	-2.4749	1.38128	-1.79175	0.0731732	0.206683	Non Significant
ENSG00000164099	PRSS12	protein_coding	24.8373	-2.46519	0.595345	-4.14077	3.4614e-05	0.000299839	Down Regulated in U937_PMA
ENSG00000187513	GJA4	protein_coding	1.05009	-2.46458	1.78132	-1.38357	0.166489	0.386618	Non Significant
ENSG00000106013	ANKRD7	protein_coding	0.905121	-2.46356	2.42223	-1.01706	0.309125	0.605931	Non Significant
ENSG00000185559	DLK1	protein_coding	240.256	-2.45874	0.222794	-11.0359	2.56338e-28	3.52707e-26	Down Regulated in U937_PMA
ENSG00000074527	NTN4	protein_coding	0.809862	-2.45176	3.24879	-0.75467	0.450447	0.778465	Non Significant
ENSG00000005379	TSPOAP1	protein_coding	121.945	-2.44934	0.419771	-5.83494	5.38093e-09	1.03698e-07	Down Regulated in U937_PMA
ENSG00000151012	SLC7A11	protein_coding	668.939	-2.43689	0.320392	-7.60596	2.82789e-14	1.1592e-12	Down Regulated in U937_PMA
ENSG00000164100	NDST3	protein_coding	10.0179	-2.43499	0.584104	-4.16876	3.06261e-05	0.000269499	Down Regulated in U937_PMA
ENSG00000124635	H2BC11	protein_coding	27.5208	-2.42872	0.361102	-6.72586	1.74557e-11	4.96327e-10	Down Regulated in U937_PMA
ENSG00000171561	OR2AT4	protein_coding	2.10779	-2.42579	1.11897	-2.16788	0.0301681	0.101555	Non Significant
ENSG00000206150	RNASE13	protein_coding	0.569817	-2.42382	2.73461	-0.886351	0.375428	0.691138	Non Significant
ENSG00000009950	MLXIPL	protein_coding	13.7301	-2.42081	0.824436	-2.93633	0.00332124	0.0162196	Down Regulated in U937_PMA
ENSG00000029534	ANK1	protein_coding	9.25464	-2.41901	1.2638	-1.91408	0.0556101	0.166205	Non Significant
ENSG00000204420	MPIG6B	protein_coding	2.44806	-2.41038	1.04746	-2.30117	0.021382	0.0768425	Non Significant
ENSG00000004776	HSPB6	protein_coding	10.1515	-2.40577	0.532576	-4.51724	6.26517e-06	6.51551e-05	Down Regulated in U937_PMA
ENSG00000146910	CNPY1	protein_coding	1.08393	-2.40133	2.9288	-0.819903	0.412271	0.734304	Non Significant
ENSG00000162399	BSND	protein_coding	1.77428	-2.39414	1.75517	-1.36405	0.172551	0.397147	Non Significant
ENSG00000178997	EXD1	protein_coding	0.971961	-2.39055	2.97724	-0.80294	0.422009	0.746512	Non Significant
ENSG00000167195	GOLGA6C	protein_coding	14.5018	-2.38984	0.656056	-3.64275	0.000269744	0.00181701	Down Regulated in U937_PMA
ENSG00000130876	SLC7A10	protein_coding	0.977675	-2.38917	1.81792	-1.31423	0.188768	0.424072	Non Significant
ENSG00000182450	KCNK4	protein_coding	1.15464	-2.37417	1.94927	-1.21798	0.223232	0.479534	Non Significant
ENSG00000181409	AATK	protein_coding	37.0766	-2.37006	0.986718	-2.40197	0.0163071	0.0615733	Non Significant
ENSG00000258644	SYNJ2BP-COX16	protein_coding	0.379157	-2.36939	4.20628	-0.563297	0.573233	0.901161	Non Significant
ENSG00000064042	LIMCH1	protein_coding	3.8959	-2.36862	1.8008	-1.31532	0.188404	0.423516	Non Significant
ENSG00000171680	PLEKHG5	protein_coding	8.11948	-2.36465	1.44849	-1.6325	0.102574	0.267848	Non Significant
ENSG00000203907	OOEP	protein_coding	1.87855	-2.36342	1.08577	-2.17673	0.0295005	0.0998087	Non Significant
ENSG00000196700	ZNF512B	protein_coding	14.0204	-2.34985	0.701826	-3.3482	0.000813382	0.00481037	Down Regulated in U937_PMA
ENSG00000113249	HAVCR1	protein_coding	2.23146	-2.3456	1.11552	-2.1027	0.0354919	0.115792	Non Significant
ENSG00000129437	KLK14	protein_coding	1.44693	-2.34418	1.78123	-1.31604	0.188159	0.423208	Non Significant
ENSG00000184986	TMEM121	protein_coding	9.20809	-2.33647	0.875287	-2.66938	0.00759925	0.0327685	Down Regulated in U937_PMA
ENSG00000005243	COPZ2	protein_coding	1.26985	-2.33537	1.49063	-1.56669	0.117186	0.29656	Non Significant
ENSG00000260903	XKR7	protein_coding	6.78524	-2.32906	0.815784	-2.85499	0.00430382	0.0202008	Down Regulated in U937_PMA
ENSG00000101460	MAP1LC3A	protein_coding	0.792611	-2.32464	2.36832	-0.981556	0.326319	0.628982	Non Significant
ENSG00000214688	C10orf105	protein_coding	12.7847	-2.32119	0.69197	-3.35447	0.000795174	0.00472399	Down Regulated in U937_PMA
ENSG00000157703	SVOPL	protein_coding	0.956145	-2.31612	3.55599	-0.651331	0.514833	0.846411	Non Significant
ENSG00000080007	DDX43	protein_coding	5.15911	-2.31464	1.33787	-1.73009	0.0836133	0.229613	Non Significant
ENSG00000197712	FAM114A1	protein_coding	123.532	-2.31452	0.353037	-6.55602	5.52622e-11	1.46344e-09	Down Regulated in U937_PMA
ENSG00000168807	SNTB2	protein_coding	284.17	-2.31389	0.244896	-9.44846	3.4385e-21	2.68476e-19	Down Regulated in U937_PMA
ENSG00000146122	DAAM2	protein_coding	9.3553	-2.31097	1.11389	-2.07468	0.0380159	0.122689	Non Significant
ENSG00000120160	EQTN	protein_coding	2.43878	-2.30956	0.989597	-2.33384	0.0196042	0.0717641	Non Significant
ENSG00000079101	CLUL1	protein_coding	4.22319	-2.30869	1.15794	-1.99379	0.0461745	0.143211	Non Significant
ENSG00000143107	FNDC7	protein_coding	2.63562	-2.30728	0.916398	-2.51777	0.0118101	0.0472981	Down Regulated in U937_PMA
ENSG00000185988	PLK5	protein_coding	3.31898	-2.30587	1.19412	-1.93102	0.0534811	0.161444	Non Significant
ENSG00000273274	ZBTB8B	protein_coding	2.33159	-2.30238	1.08944	-2.11337	0.0345692	0.113413	Non Significant
ENSG00000205213	LGR4	protein_coding	15.9021	-2.30183	0.649255	-3.54534	0.0003921	0.00253365	Down Regulated in U937_PMA
ENSG00000105696	TMEM59L	protein_coding	18.0565	-2.29986	0.596227	-3.85736	0.000114619	0.000853615	Down Regulated in U937_PMA
ENSG00000162728	KCNJ9	protein_coding	1.71353	-2.29428	2.18495	-1.05004	0.293701	0.58284	Non Significant
ENSG00000188573	FBLL1	protein_coding	1.06064	-2.29089	2.11762	-1.08182	0.279331	0.561911	Non Significant
ENSG00000187634	SAMD11	protein_coding	62.6406	-2.28969	0.451838	-5.06751	4.03054e-07	5.43185e-06	Down Regulated in U937_PMA
ENSG00000122733	PHF24	protein_coding	8.46722	-2.28488	0.621359	-3.67724	0.000235772	0.00161414	Down Regulated in U937_PMA
ENSG00000268870	ENSG00000268870	protein_coding	0.858196	-2.2841	2.71748	-0.84052	0.400617	0.720195	Non Significant
ENSG00000130643	CALY	protein_coding	1.95427	-2.27655	1.48291	-1.53519	0.124737	0.310516	Non Significant
ENSG00000137976	DNASE2B	protein_coding	5.53253	-2.26771	0.679115	-3.33921	0.000840173	0.00494182	Down Regulated in U937_PMA
ENSG00000272104	ENSG00000272104	protein_coding	0.446299	-2.26521	4.20969	-0.538096	0.590511	0.918417	Non Significant
ENSG00000100101	ENSG00000100101	protein_coding	0.494282	-2.2596	3.77192	-0.599058	0.549134	0.878667	Non Significant
ENSG00000173557	FAM166C	protein_coding	0.801025	-2.25109	3.73973	-0.601938	0.547215	0.876435	Non Significant
ENSG00000130822	PNCK	protein_coding	8.41998	-2.24991	0.862875	-2.60746	0.00912156	0.0382433	Down Regulated in U937_PMA
ENSG00000131771	PPP1R1B	protein_coding	2.20528	-2.23656	1.0869	-2.05775	0.0396144	0.126453	Non Significant
ENSG00000285953	ENSG00000285953	protein_coding	9.14714	-2.2338	1.19483	-1.86956	0.0615455	0.180769	Non Significant
ENSG00000072858	SIDT1	protein_coding	5.30593	-2.23234	1.11281	-2.00604	0.0448523	0.139976	Non Significant
ENSG00000137843	PAK6	protein_coding	7.3321	-2.23028	0.957003	-2.33049	0.0197805	0.0722482	Non Significant
ENSG00000115468	EFHD1	protein_coding	3.43172	-2.22953	1.039	-2.14585	0.0318851	0.106406	Non Significant
ENSG00000145850	TIMD4	protein_coding	0.292713	-2.22856	4.21591	-0.528606	0.597079	0.923728	Non Significant
ENSG00000066248	NGEF	protein_coding	49.691	-2.22338	0.958979	-2.31848	0.0204231	0.0741411	Non Significant
ENSG00000241476	SSX2	protein_coding	0.335567	-2.21596	4.21715	-0.525466	0.59926	0.92571	Non Significant
ENSG00000164972	C9orf24	protein_coding	0.717051	-2.20829	2.03349	-1.08596	0.277499	0.559203	Non Significant
ENSG00000204967	PCDHA4	protein_coding	1.7007	-2.20529	2.43845	-0.904383	0.365792	0.679506	Non Significant
ENSG00000274322	ENSG00000274322	protein_coding	22.2829	-2.20158	0.343338	-6.41227	1.43367e-10	3.58435e-09	Down Regulated in U937_PMA
ENSG00000282419	TEX13D	protein_coding	0.829754	-2.19897	2.88132	-0.763182	0.445355	0.773211	Non Significant
ENSG00000243649	CFB	protein_coding	13.1263	-2.1976	0.704934	-3.11745	0.00182422	0.0096826	Down Regulated in U937_PMA
ENSG00000127588	GNG13	protein_coding	0.923975	-2.19519	2.13996	-1.02581	0.304983	0.600024	Non Significant
ENSG00000204950	LRRC10B	protein_coding	2.35971	-2.18957	1.9158	-1.1429	0.253079	0.523795	Non Significant
ENSG00000140623	SEPTIN12	protein_coding	1.08206	-2.18636	2.66764	-0.819586	0.412452	0.734559	Non Significant
ENSG00000077942	FBLN1	protein_coding	2.26444	-2.18329	1.27849	-1.70771	0.0876902	0.238281	Non Significant
ENSG00000126856	PRDM7	protein_coding	0.93743	-2.18285	1.77872	-1.22721	0.219745	0.473987	Non Significant
ENSG00000149295	DRD2	protein_coding	0.802414	-2.17927	2.66267	-0.818454	0.413098	0.735146	Non Significant
ENSG00000137860	SLC28A2	protein_coding	1.0179	-2.16979	1.87567	-1.1568	0.247352	0.515726	Non Significant
ENSG00000135919	SERPINE2	protein_coding	1254.24	-2.16876	0.141687	-15.3067	6.90066e-53	3.31164e-50	Down Regulated in U937_PMA
ENSG00000182795	C1orf116	protein_coding	2.04744	-2.16787	1.18533	-1.82891	0.0674132	0.193865	Non Significant
ENSG00000286095	SPEGNB	protein_coding	1.2377	-2.16441	2.14219	-1.01037	0.312316	0.61006	Non Significant
ENSG00000110811	P3H3	protein_coding	39.2946	-2.16398	0.897351	-2.41152	0.0158862	0.0602965	Non Significant
ENSG00000289282	ENSG00000289282	protein_coding	9.35619	-2.14893	4.08796	-0.525674	0.599115	0.92571	Non Significant
ENSG00000172318	B3GALT1	protein_coding	0.856968	-2.14684	2.61803	-0.820021	0.412204	0.734252	Non Significant
ENSG00000184144	CNTN2	protein_coding	2.38585	-2.14585	1.75299	-1.2241	0.220913	0.475567	Non Significant
ENSG00000120057	SFRP5	protein_coding	1.33536	-2.1451	1.66821	-1.28587	0.198489	0.439608	Non Significant
ENSG00000012223	LTF	protein_coding	2.12571	-2.14257	2.35433	-0.910052	0.362795	0.675789	Non Significant
ENSG00000160963	COL26A1	protein_coding	3.28422	-2.14063	1.06725	-2.00574	0.044884	0.139995	Non Significant
ENSG00000167608	TMC4	protein_coding	7.27547	-2.1375	0.909308	-2.35068	0.0187389	0.0691497	Non Significant
ENSG00000185615	PDIA2	protein_coding	1.73603	-2.13437	2.07454	-1.02884	0.303553	0.597989	Non Significant
ENSG00000169393	ELSPBP1	protein_coding	0.423046	-2.1294	4.21918	-0.504696	0.613773	0.937828	Non Significant
ENSG00000197587	DMBX1	protein_coding	1.3107	-2.12873	1.6657	-1.27798	0.201258	0.444739	Non Significant
ENSG00000174498	IGDCC3	protein_coding	3.07408	-2.12173	1.06327	-1.99547	0.045992	0.142757	Non Significant
ENSG00000175202	HIGD2B	protein_coding	0.656724	-2.11113	2.10322	-1.00377	0.315492	0.614129	Non Significant
ENSG00000151846	PABPC3	protein_coding	2.27917	-2.10944	1.75582	-1.2014	0.229596	0.489387	Non Significant
ENSG00000270249	ENSG00000270249	protein_coding	1.22013	-2.10017	2.03766	-1.03068	0.302692	0.596831	Non Significant
ENSG00000204442	NALF1	protein_coding	1.56157	-2.09848	2.04853	-1.02438	0.305655	0.600956	Non Significant
ENSG00000105609	LILRB5	protein_coding	2.4555	-2.09748	1.31863	-1.59065	0.111689	0.286518	Non Significant
ENSG00000142748	FCN3	protein_coding	0.424267	-2.08945	4.21523	-0.495691	0.620113	0.943062	Non Significant
ENSG00000147144	CCDC120	protein_coding	1.3126	-2.08811	1.45048	-1.4396	0.14998	0.357776	Non Significant
ENSG00000171160	MORN4	protein_coding	5.70008	-2.08788	1.35581	-1.53996	0.123571	0.308042	Non Significant
ENSG00000272896	ENSG00000272896	protein_coding	15.4671	-2.08689	0.473269	-4.40952	1.03602e-05	0.000102362	Down Regulated in U937_PMA
ENSG00000178752	ERFE	protein_coding	85.7659	-2.08636	0.293326	-7.11276	1.13748e-12	3.85881e-11	Down Regulated in U937_PMA
ENSG00000258643	BCL2L2-PABPN1	protein_coding	106.544	-2.08261	0.531018	-3.92193	8.78437e-05	0.00067914	Down Regulated in U937_PMA
ENSG00000130300	PLVAP	protein_coding	1.99513	-2.08069	1.12253	-1.85357	0.063801	0.186041	Non Significant
ENSG00000130203	APOE	protein_coding	231.258	-2.07548	0.274088	-7.57232	3.6663e-14	1.47824e-12	Down Regulated in U937_PMA
ENSG00000170426	SDR9C7	protein_coding	2.07886	-2.07008	1.36719	-1.51412	0.129996	0.320607	Non Significant
ENSG00000172901	LVRN	protein_coding	10.8192	-2.06932	0.629219	-3.28871	0.00100649	0.00574684	Down Regulated in U937_PMA
ENSG00000155367	PPM1J	protein_coding	20.5223	-2.06886	0.76564	-2.70213	0.00688965	0.0301514	Down Regulated in U937_PMA
ENSG00000161544	CYGB	protein_coding	4.06722	-2.06521	1.16276	-1.77613	0.075712	0.21224	Non Significant
ENSG00000144488	ESPNL	protein_coding	6.3967	-2.06293	0.949923	-2.17168	0.0298801	0.100792	Non Significant
ENSG00000213463	SYNJ2BP	protein_coding	6.86137	-2.05485	0.580394	-3.54044	0.000399461	0.00257698	Down Regulated in U937_PMA
ENSG00000178773	CPNE7	protein_coding	73.1849	-2.05383	0.804657	-2.55243	0.0106974	0.0435769	Down Regulated in U937_PMA
ENSG00000164778	EN2	protein_coding	2.43025	-2.05361	1.16277	-1.76614	0.0773719	0.215817	Non Significant
ENSG00000124664	SPDEF	protein_coding	2.33519	-2.04501	1.19779	-1.70732	0.0877617	0.238377	Non Significant
ENSG00000070808	CAMK2A	protein_coding	2.09714	-2.04393	1.40508	-1.45467	0.145761	0.349755	Non Significant
ENSG00000289695	ENSG00000289695	protein_coding	1.057	-2.04279	1.54152	-1.32518	0.185112	0.418629	Non Significant
ENSG00000258724	PINX1	protein_coding	1.50715	-2.03956	2.18358	-0.934043	0.350282	0.659598	Non Significant
ENSG00000105227	PRX	protein_coding	203.845	-2.0383	0.254218	-8.01793	1.07546e-15	5.18648e-14	Down Regulated in U937_PMA
ENSG00000287856	ENSG00000287856	protein_coding	3.04474	-2.03672	2.47397	-0.82326	0.41036	0.731827	Non Significant
ENSG00000164684	ZNF704	protein_coding	4.56307	-2.03505	3.36085	-0.605517	0.544836	0.87419	Non Significant
ENSG00000170458	CD14	protein_coding	10.293	-2.02594	0.721588	-2.80761	0.00499104	0.022882	Down Regulated in U937_PMA
ENSG00000276180	H4C9	protein_coding	5.1521	-2.02485	0.66538	-3.04315	0.00234117	0.0120117	Down Regulated in U937_PMA
ENSG00000134489	HRH4	protein_coding	1.9116	-2.0222	1.24755	-1.62094	0.10503	0.272923	Non Significant
ENSG00000285404	ENSG00000285404	protein_coding	0.190347	-2.02207	4.21732	-0.479467	0.631607	0.952737	Non Significant
ENSG00000155269	GPR78	protein_coding	2.32629	-2.02035	1.19347	-1.69284	0.0904851	0.244223	Non Significant
ENSG00000130270	ATP8B3	protein_coding	391.412	-2.01881	0.284964	-7.08443	1.39617e-12	4.6799e-11	Down Regulated in U937_PMA
ENSG00000255524	NPIPB8	protein_coding	4.76908	-2.01706	0.952028	-2.11869	0.0341163	0.112226	Non Significant
ENSG00000101443	WFDC2	protein_coding	3.16605	-2.01565	0.763065	-2.64152	0.00825341	0.0351257	Down Regulated in U937_PMA
ENSG00000242550	SERPINB10	protein_coding	26.4663	-2.01388	0.374538	-5.37697	7.57516e-08	1.17639e-06	Down Regulated in U937_PMA
ENSG00000136717	BIN1	protein_coding	179.427	-2.01227	0.83096	-2.42162	0.0154515	0.0588885	Non Significant
ENSG00000276950	GSTT4	protein_coding	0.598444	-2.0117	2.34546	-0.8577	0.391058	0.708552	Non Significant
ENSG00000114854	TNNC1	protein_coding	7.09957	-2.0101	1.04056	-1.93174	0.0533912	0.161247	Non Significant
ENSG00000168135	KCNJ4	protein_coding	1.3693	-2.00755	1.92421	-1.04331	0.296804	0.587158	Non Significant
ENSG00000158748	HTR6	protein_coding	2.35142	-1.99852	1.23244	-1.6216	0.10489	0.272594	Non Significant
ENSG00000166147	FBN1	protein_coding	240.265	-1.98735	0.329591	-6.02974	1.64227e-09	3.45966e-08	Down Regulated in U937_PMA
ENSG00000236027	PATE3	protein_coding	0.35167	-1.97726	4.21899	-0.468657	0.639315	0.958559	Non Significant
ENSG00000213658	LAT	protein_coding	263.246	-1.97544	0.262803	-7.51683	5.61201e-14	2.22625e-12	Down Regulated in U937_PMA
ENSG00000133131	MORC4	protein_coding	1.39405	-1.97487	1.62297	-1.21682	0.223672	0.480193	Non Significant
ENSG00000149516	MS4A3	protein_coding	326.291	-1.97192	0.878338	-2.24506	0.0247645	0.0867947	Non Significant
ENSG00000262484	CCER2	protein_coding	5.99757	-1.96439	0.693233	-2.83367	0.00460174	0.021385	Down Regulated in U937_PMA
ENSG00000120471	TP53AIP1	protein_coding	9.72231	-1.96386	0.534972	-3.67096	0.000241645	0.00164918	Down Regulated in U937_PMA
ENSG00000171724	VAT1L	protein_coding	4.21474	-1.95944	0.782761	-2.50324	0.0123063	0.048927	Down Regulated in U937_PMA
ENSG00000167508	MVD	protein_coding	900.059	-1.95757	0.189982	-10.304	6.76206e-25	7.35084e-23	Down Regulated in U937_PMA
ENSG00000238269	PAGE2B	protein_coding	2.53785	-1.95756	1.02482	-1.91015	0.0561134	0.167413	Non Significant
ENSG00000138162	TACC2	protein_coding	20.0879	-1.95679	1.23501	-1.58443	0.113095	0.288733	Non Significant
ENSG00000172538	FAM170B	protein_coding	0.637573	-1.95281	1.81003	-1.07888	0.280639	0.563915	Non Significant
ENSG00000113140	SPARC	protein_coding	18.5513	-1.94993	0.563509	-3.46033	0.000539508	0.003385	Down Regulated in U937_PMA
ENSG00000101298	SNPH	protein_coding	10.297	-1.9383	0.646232	-2.99939	0.00270521	0.0135959	Down Regulated in U937_PMA
ENSG00000165188	RNF183	protein_coding	4.65491	-1.93807	0.749908	-2.58442	0.0097544	0.0404228	Down Regulated in U937_PMA
ENSG00000109832	DDX25	protein_coding	3.05707	-1.93632	1.11449	-1.7374	0.0823157	0.226879	Non Significant
ENSG00000054654	SYNE2	protein_coding	4.18104	-1.93565	1.25193	-1.54613	0.122072	0.305274	Non Significant
ENSG00000163993	S100P	protein_coding	928.305	-1.93209	0.604062	-3.1985	0.00138144	0.00761808	Down Regulated in U937_PMA
ENSG00000108825	PTGES3L-AARSD1	protein_coding	45.8505	-1.92635	0.34274	-5.62043	1.9e-08	3.31376e-07	Down Regulated in U937_PMA
ENSG00000186204	CYP4F12	protein_coding	4.24629	-1.92485	0.865859	-2.22305	0.0262122	0.0908332	Non Significant
ENSG00000255073	ZFP91-CNTF	protein_coding	1.00478	-1.91766	3.88788	-0.493241	0.621842	0.944119	Non Significant
ENSG00000148734	NPFFR1	protein_coding	15.854	-1.90541	0.727327	-2.61974	0.00879976	0.0371235	Down Regulated in U937_PMA
ENSG00000111674	ENO2	protein_coding	80.4278	-1.90495	0.435183	-4.37735	1.20128e-05	0.000116656	Down Regulated in U937_PMA
ENSG00000136010	ALDH1L2	protein_coding	178.013	-1.90272	0.364942	-5.21377	1.85e-07	2.681e-06	Down Regulated in U937_PMA
ENSG00000137265	IRF4	protein_coding	15.3957	-1.90031	0.610325	-3.11361	0.00184816	0.00979645	Down Regulated in U937_PMA
ENSG00000215045	GRID2IP	protein_coding	3.32499	-1.89393	1.51026	-1.25404	0.209827	0.458331	Non Significant
ENSG00000105668	UPK1A	protein_coding	1.287	-1.89314	1.33875	-1.41411	0.157329	0.371042	Non Significant
ENSG00000132170	PPARG	protein_coding	983.214	-1.88798	0.147361	-12.8119	1.40576e-37	3.7378e-35	Down Regulated in U937_PMA
ENSG00000227191	TRGC2	TR_C_gene	68.7925	-1.8844	0.259257	-7.26845	3.63629e-13	1.30562e-11	Down Regulated in U937_PMA
ENSG00000286132	ENSG00000286132	protein_coding	1.77723	-1.88117	1.7068	-1.10216	0.270393	0.548762	Non Significant
ENSG00000165633	VSTM4	protein_coding	7.35812	-1.88049	0.55423	-3.39297	0.000691382	0.00418742	Down Regulated in U937_PMA
ENSG00000188766	SPRED3	protein_coding	136.911	-1.87855	0.386013	-4.86654	1.13567e-06	1.39224e-05	Down Regulated in U937_PMA
ENSG00000173705	SUSD5	protein_coding	11.0113	-1.87692	0.566764	-3.31164	0.000927511	0.00536598	Down Regulated in U937_PMA
ENSG00000189292	ALKAL2	protein_coding	2.41123	-1.87051	1.1124	-1.6815	0.092665	0.248742	Non Significant
ENSG00000090097	PCBP4	protein_coding	323.601	-1.86727	0.180158	-10.3646	3.59119e-25	4.08441e-23	Down Regulated in U937_PMA
ENSG00000273291	ENSG00000273291	protein_coding	0.405	-1.86661	3.31584	-0.562938	0.573477	0.901185	Non Significant
ENSG00000257921	ENSG00000257921	protein_coding	8.91705	-1.86602	0.974961	-1.91394	0.0556281	0.166217	Non Significant
ENSG00000101255	TRIB3	protein_coding	1863.55	-1.86143	0.206751	-9.00324	2.19147e-19	1.45674e-17	Down Regulated in U937_PMA
ENSG00000152672	CLEC4F	protein_coding	1.01266	-1.8606	1.77225	-1.04986	0.293784	0.582851	Non Significant
ENSG00000100450	GZMH	protein_coding	5.23006	-1.85724	0.727708	-2.55218	0.0107051	0.0435913	Down Regulated in U937_PMA
ENSG00000241484	ARHGAP8	protein_coding	128.305	-1.85694	0.323274	-5.74417	9.23716e-09	1.70178e-07	Down Regulated in U937_PMA
ENSG00000180806	HOXC9	protein_coding	6.67354	-1.85544	1.18255	-1.56902	0.116644	0.29572	Non Significant
ENSG00000081842	PCDHA6	protein_coding	1.10352	-1.85543	2.41157	-0.769388	0.441663	0.769313	Non Significant
ENSG00000179168	GGN	protein_coding	35.9125	-1.85244	0.562078	-3.2957	0.000981757	0.00562196	Down Regulated in U937_PMA
ENSG00000083857	FAT1	protein_coding	47.4974	-1.85114	0.825562	-2.24228	0.0249432	0.087219	Non Significant
ENSG00000087842	PIR	protein_coding	159.4	-1.84976	0.269987	-6.85129	7.31881e-12	2.22573e-10	Down Regulated in U937_PMA
ENSG00000197165	SULT1A2	protein_coding	1.15817	-1.84484	1.51288	-1.21942	0.222685	0.478641	Non Significant
ENSG00000154556	SORBS2	protein_coding	2.71939	-1.84174	1.62488	-1.13346	0.257021	0.529378	Non Significant
ENSG00000106526	ACTR3C	protein_coding	1.59921	-1.83894	2.4328	-0.755893	0.449713	0.77769	Non Significant
ENSG00000118004	COLEC11	protein_coding	3.2536	-1.83771	1.14294	-1.60788	0.107861	0.278405	Non Significant
ENSG00000105327	BBC3	protein_coding	205.999	-1.83719	0.186342	-9.85925	6.25117e-23	5.66811e-21	Down Regulated in U937_PMA
ENSG00000142511	GPR32	protein_coding	1.06989	-1.83588	1.94599	-0.943415	0.345469	0.653349	Non Significant
ENSG00000165730	STOX1	protein_coding	7.76268	-1.83554	0.787199	-2.33174	0.0197145	0.0720607	Non Significant
ENSG00000153885	KCTD15	protein_coding	379.705	-1.83475	0.226552	-8.09859	5.56007e-16	2.72139e-14	Down Regulated in U937_PMA
ENSG00000285816	ENSG00000285816	protein_coding	15.0862	-1.83394	1.722	-1.06501	0.286873	0.572407	Non Significant
ENSG00000132702	HAPLN2	protein_coding	2.14683	-1.82799	0.999856	-1.82825	0.0675119	0.194035	Non Significant
ENSG00000242173	ARHGDIG	protein_coding	0.656239	-1.82122	2.12501	-0.857042	0.391422	0.708977	Non Significant
ENSG00000164591	MYOZ3	protein_coding	2.79851	-1.82085	1.04443	-1.7434	0.0812635	0.224633	Non Significant
ENSG00000215906	LACTBL1	protein_coding	1.19469	-1.81991	3.46551	-0.525148	0.59948	0.92571	Non Significant
ENSG00000160282	FTCD	protein_coding	4.36398	-1.81677	0.828303	-2.19336	0.0282815	0.0964581	Non Significant
ENSG00000099282	TSPAN15	protein_coding	3.00737	-1.81542	1.57495	-1.15268	0.24904	0.518256	Non Significant
ENSG00000186471	AKAP14	protein_coding	1.18078	-1.81465	1.92064	-0.944816	0.344753	0.652386	Non Significant
ENSG00000131097	HIGD1B	protein_coding	1.25324	-1.80448	1.2485	-1.44532	0.148368	0.354972	Non Significant
ENSG00000204970	PCDHA1	protein_coding	1.38587	-1.80406	1.73837	-1.03779	0.299369	0.591522	Non Significant
ENSG00000234965	SHISA8	protein_coding	1.98009	-1.80188	2.06679	-0.871827	0.383303	0.700331	Non Significant
ENSG00000140009	ESR2	protein_coding	2.0359	-1.79124	1.11376	-1.60829	0.107773	0.278291	Non Significant
ENSG00000244242	IFITM10	protein_coding	45.9166	-1.78969	0.383789	-4.66322	3.113e-06	3.4684e-05	Down Regulated in U937_PMA
ENSG00000135069	PSAT1	protein_coding	3836.15	-1.78499	0.138529	-12.8853	5.44649e-38	1.51602e-35	Down Regulated in U937_PMA
ENSG00000166866	MYO1A	protein_coding	12.6082	-1.78047	0.541631	-3.28723	0.00101178	0.00577204	Down Regulated in U937_PMA
ENSG00000132481	TRIM47	protein_coding	6.29974	-1.77919	1.20933	-1.47122	0.141231	0.341047	Non Significant
ENSG00000228623	ZNF883	protein_coding	1.2082	-1.77882	1.46298	-1.21589	0.224027	0.480851	Non Significant
ENSG00000185303	SFTPA2	protein_coding	0.873498	-1.77634	1.56656	-1.13391	0.25683	0.529041	Non Significant
ENSG00000178882	RFLNA	protein_coding	6.81848	-1.77415	0.764967	-2.31925	0.0203814	0.0740308	Non Significant
ENSG00000139890	REM2	protein_coding	22.8342	-1.77361	0.435826	-4.06953	4.71072e-05	0.000392082	Down Regulated in U937_PMA
ENSG00000062038	CDH3	protein_coding	7.42793	-1.77172	0.73869	-2.39847	0.0164639	0.0620938	Non Significant
ENSG00000134539	KLRD1	protein_coding	9.77763	-1.77162	0.826761	-2.14284	0.0321258	0.107028	Non Significant
ENSG00000270316	BORCS7-ASMT	protein_coding	7.19491	-1.76986	4.10761	-0.430873	0.666561	0.979931	Non Significant
ENSG00000127324	TSPAN8	protein_coding	0.515062	-1.76605	3.61756	-0.48819	0.625416	0.947288	Non Significant
ENSG00000284969	ENSG00000284969	protein_coding	2.25958	-1.76492	1.70276	-1.03651	0.299964	0.59264	Non Significant
ENSG00000144119	C1QL2	protein_coding	1.08225	-1.76406	2.0331	-0.867673	0.385574	0.702653	Non Significant
ENSG00000139549	DHH	protein_coding	5.62147	-1.76307	0.666106	-2.64684	0.00812484	0.0346928	Down Regulated in U937_PMA
ENSG00000289690	ENSG00000289690	protein_coding	1.81878	-1.76143	2.1097	-0.83492	0.403763	0.723472	Non Significant
ENSG00000159625	DRC7	protein_coding	19.5607	-1.76117	0.526847	-3.34285	0.000829231	0.00488746	Down Regulated in U937_PMA
ENSG00000115457	IGFBP2	protein_coding	1333.44	-1.75868	0.238932	-7.36059	1.83102e-13	6.77624e-12	Down Regulated in U937_PMA
ENSG00000125968	ID1	protein_coding	21.935	-1.75781	0.427414	-4.11266	3.91123e-05	0.000334452	Down Regulated in U937_PMA
ENSG00000111536	IL26	protein_coding	0.514649	-1.75337	3.08824	-0.567759	0.570199	0.898194	Non Significant
ENSG00000077984	CST7	protein_coding	1404.2	-1.75295	0.226934	-7.72448	1.12309e-14	4.81437e-13	Down Regulated in U937_PMA
ENSG00000188257	PLA2G2A	protein_coding	0.735669	-1.7496	1.67797	-1.04269	0.297091	0.587612	Non Significant
ENSG00000197181	PIWIL2	protein_coding	9.5424	-1.74939	0.512672	-3.41231	0.000644157	0.00393719	Down Regulated in U937_PMA
ENSG00000105398	SULT2A1	protein_coding	0.277701	-1.74891	4.22665	-0.413782	0.679034	0.990101	Non Significant
ENSG00000205922	ONECUT3	protein_coding	8.50525	-1.74702	0.840549	-2.07842	0.0376705	0.121868	Non Significant
ENSG00000227868	TEX46	protein_coding	0.468946	-1.74599	3.11518	-0.560479	0.575153	0.90288	Non Significant
ENSG00000096696	DSP	protein_coding	1.82575	-1.74127	1.57932	-1.10255	0.270225	0.548647	Non Significant
ENSG00000136929	HEMGN	protein_coding	0.475882	-1.73685	2.47303	-0.702318	0.482481	0.81157	Non Significant
ENSG00000158458	NRG2	protein_coding	2.71438	-1.73633	1.44839	-1.1988	0.230606	0.490584	Non Significant
ENSG00000144771	LRTM1	protein_coding	0.303492	-1.73451	4.2279	-0.410252	0.681621	0.992043	Non Significant
ENSG00000130283	GDF1	protein_coding	24.7045	-1.72759	3.15434	-0.547687	0.583907	0.912319	Non Significant
ENSG00000069696	DRD4	protein_coding	5.84443	-1.72529	0.653103	-2.64168	0.00824948	0.0351183	Down Regulated in U937_PMA
ENSG00000162676	GFI1	protein_coding	6661.59	-1.72311	0.114235	-15.0839	2.06839e-51	9.46455e-49	Down Regulated in U937_PMA
ENSG00000255974	CYP2A6	protein_coding	1.52344	-1.72051	1.85141	-0.929301	0.352733	0.662566	Non Significant
ENSG00000134955	SLC37A2	protein_coding	789.135	-1.71433	0.25469	-6.73102	1.68478e-11	4.80431e-10	Down Regulated in U937_PMA
ENSG00000170214	ADRA1B	protein_coding	0.981355	-1.71333	1.6357	-1.04746	0.294888	0.584371	Non Significant
ENSG00000172465	TCEAL1	protein_coding	0.340127	-1.7113	4.20929	-0.406552	0.684337	0.993728	Non Significant
ENSG00000146205	ANO7	protein_coding	7.68065	-1.70812	1.31134	-1.30257	0.192721	0.430907	Non Significant
ENSG00000283128	ENSG00000283128	protein_coding	12.3041	-1.7081	0.583926	-2.9252	0.00344237	0.0167157	Down Regulated in U937_PMA
ENSG00000177283	FZD8	protein_coding	2.77753	-1.70727	2.30236	-0.741531	0.458372	0.787558	Non Significant
ENSG00000196289	BECN2	protein_coding	0.386643	-1.7065	4.22768	-0.403649	0.686471	0.995383	Non Significant
ENSG00000077274	CAPN6	protein_coding	0.65912	-1.70484	3.33041	-0.511901	0.608721	0.933966	Non Significant
ENSG00000215695	RSC1A1	protein_coding	7.13263	-1.70355	2.79792	-0.608865	0.542614	0.872273	Non Significant
ENSG00000102385	DRP2	protein_coding	57.2783	-1.70074	0.351411	-4.83976	1.3e-06	1.5702e-05	Down Regulated in U937_PMA
ENSG00000247595	SPTY2D1OS	protein_coding	4.10871	-1.70044	0.998855	-1.70239	0.0886821	0.240445	Non Significant
ENSG00000229292	RFPL4AL1	protein_coding	0.15002	-1.69992	4.22961	-0.401909	0.687751	0.99626	Non Significant
ENSG00000134107	BHLHE40	protein_coding	1003.08	-1.69687	0.1368	-12.404	2.4849e-35	5.43254e-33	Down Regulated in U937_PMA
ENSG00000120093	HOXB3	protein_coding	1.92988	-1.69616	1.64381	-1.03184	0.302145	0.596051	Non Significant
ENSG00000234438	KBTBD13	protein_coding	6.88642	-1.69515	1.23282	-1.37502	0.169125	0.391219	Non Significant
ENSG00000146276	GABRR1	protein_coding	1.7594	-1.69352	2.67124	-0.633983	0.526092	0.856194	Non Significant
ENSG00000181218	H2AC25	protein_coding	99.355	-1.69333	0.320153	-5.28912	1.22903e-07	1.84928e-06	Down Regulated in U937_PMA
ENSG00000164007	CLDN19	protein_coding	0.895523	-1.68957	2.26832	-0.744854	0.45636	0.785732	Non Significant
ENSG00000176302	FOXR1	protein_coding	0.798536	-1.68751	2.72288	-0.619751	0.535422	0.865166	Non Significant
ENSG00000164647	STEAP1	protein_coding	0.287258	-1.68645	4.21227	-0.400366	0.688887	0.99673	Non Significant
ENSG00000171649	ZIK1	protein_coding	14.0341	-1.68545	0.718473	-2.34588	0.0189824	0.069917	Non Significant
ENSG00000248405	PRR5-ARHGAP8	protein_coding	24.3657	-1.68439	0.513072	-3.28294	0.00102729	0.00584955	Down Regulated in U937_PMA
ENSG00000172232	AZU1	protein_coding	2686.42	-1.68306	0.209402	-8.03744	9.17369e-16	4.43493e-14	Down Regulated in U937_PMA
ENSG00000089692	LAG3	protein_coding	3.9196	-1.68295	0.919116	-1.83106	0.0670918	0.193166	Non Significant
ENSG00000163689	CFAP20DC	protein_coding	0.971731	-1.68139	4.23186	-0.397318	0.691133	0.998366	Non Significant
ENSG00000225528	ENSG00000225528	protein_coding	1.33311	-1.67635	1.83822	-0.91194	0.3618	0.674574	Non Significant
ENSG00000197599	CCDC154	protein_coding	30.7616	-1.67013	0.514901	-3.2436	0.00118029	0.00662203	Down Regulated in U937_PMA
ENSG00000269095	ENSG00000269095	protein_coding	0.237028	-1.66911	4.22992	-0.394595	0.693142	1	Non Significant
ENSG00000172893	DHCR7	protein_coding	2858.91	-1.66712	0.146991	-11.3417	8.159e-30	1.22547e-27	Down Regulated in U937_PMA
ENSG00000163645	ERICH6	protein_coding	1.01868	-1.66565	1.74508	-0.954482	0.33984	0.646182	Non Significant
ENSG00000065911	MTHFD2	protein_coding	4969.44	-1.66485	0.120963	-13.7633	4.23643e-43	1.47482e-40	Down Regulated in U937_PMA
ENSG00000106868	SUSD1	protein_coding	99.6728	-1.66275	0.459785	-3.61636	0.00029877	0.00199207	Down Regulated in U937_PMA
ENSG00000223802	CERS1	protein_coding	83.676	-1.66273	0.955765	-1.73969	0.0819137	0.226177	Non Significant
ENSG00000177627	C12orf54	protein_coding	0.22522	-1.66236	4.22892	-0.393094	0.69425	1	Non Significant
ENSG00000136014	USP44	protein_coding	162.189	-1.66128	0.211485	-7.85532	3.98748e-15	1.77105e-13	Down Regulated in U937_PMA
ENSG00000163520	FBLN2	protein_coding	2.36639	-1.66079	1.28569	-1.29175	0.196444	0.436404	Non Significant
ENSG00000172818	OVOL1	protein_coding	2.07499	-1.65883	1.30489	-1.27124	0.203643	0.449144	Non Significant
ENSG00000162367	TAL1	protein_coding	2.59472	-1.65517	1.61215	-1.02668	0.304569	0.599408	Non Significant
ENSG00000197561	ELANE	protein_coding	910.171	-1.65415	0.24486	-6.75548	1.42368e-11	4.10136e-10	Down Regulated in U937_PMA
ENSG00000156097	GPR61	protein_coding	3.37035	-1.65362	1.09494	-1.51024	0.130983	0.322354	Non Significant
ENSG00000170509	HSD17B13	protein_coding	49.2533	-1.65325	0.254154	-6.50492	7.77333e-11	2e-09	Down Regulated in U937_PMA
ENSG00000171931	FBXW10	protein_coding	1.91692	-1.65273	2.31765	-0.713105	0.475781	0.804733	Non Significant
ENSG00000163638	ADAMTS9	protein_coding	70.9652	-1.65242	0.395874	-4.17412	2.99146e-05	0.000264301	Down Regulated in U937_PMA
ENSG00000140451	PIF1	protein_coding	192.549	-1.65141	0.300424	-5.49693	3.86453e-08	6.37907e-07	Down Regulated in U937_PMA
ENSG00000215203	GRXCR1	protein_coding	0.328714	-1.64899	4.21356	-0.391353	0.695536	1	Non Significant
ENSG00000285708	ENSG00000285708	protein_coding	6.74734	-1.64765	1.16706	-1.4118	0.15801	0.371994	Non Significant
ENSG00000164841	TMEM74	protein_coding	1.68232	-1.64407	1.35386	-1.21436	0.224611	0.481841	Non Significant
ENSG00000111796	KLRB1	protein_coding	2.45567	-1.63797	1.01988	-1.60604	0.108266	0.279301	Non Significant
ENSG00000141750	STAC2	protein_coding	0.777761	-1.63559	2.98864	-0.54727	0.584193	0.912486	Non Significant
ENSG00000175691	ZNF77	protein_coding	4.38756	-1.63445	0.843182	-1.93844	0.05257	0.159156	Non Significant
ENSG00000158525	CPA5	protein_coding	0.742837	-1.63348	2.79162	-0.585138	0.558455	0.887	Non Significant
ENSG00000254806	SYS1-DBNDD2	protein_coding	14.4943	-1.63348	0.638019	-2.56024	0.01046	0.0427882	Down Regulated in U937_PMA
ENSG00000263715	LINC02210-CRHR1	protein_coding	2.22447	-1.63268	1.73168	-0.942827	0.345769	0.653604	Non Significant
ENSG00000103241	FOXF1	protein_coding	272.453	-1.63259	0.950025	-1.71848	0.0857099	0.234129	Non Significant
ENSG00000228278	ORM2	protein_coding	0.32875	-1.62716	2.99495	-0.543303	0.586921	0.91463	Non Significant
ENSG00000095587	TLL2	protein_coding	27.662	-1.627	0.513046	-3.17126	0.00151781	0.00825515	Down Regulated in U937_PMA
ENSG00000173585	CCR9	protein_coding	3.2233	-1.62589	1.10034	-1.47763	0.139507	0.337881	Non Significant
ENSG00000165140	FBP1	protein_coding	13.6248	-1.62476	0.80226	-2.02523	0.0428441	0.13482	Non Significant
ENSG00000186407	CD300E	protein_coding	19.2201	-1.62472	0.531507	-3.05682	0.00223696	0.0115524	Down Regulated in U937_PMA
ENSG00000213927	CCL27	protein_coding	0.415524	-1.62234	2.93345	-0.553049	0.58023	0.908242	Non Significant
ENSG00000274933	TBC1D3I	protein_coding	5.65094	-1.62175	0.883619	-1.83535	0.0664537	0.191834	Non Significant
ENSG00000034053	APBA2	protein_coding	187.154	-1.6216	0.318787	-5.08679	3.6417e-07	4.9693e-06	Down Regulated in U937_PMA
ENSG00000104341	LAPTM4B	protein_coding	1.5843	-1.62065	2.88041	-0.562643	0.573678	0.901284	Non Significant
ENSG00000179846	NKPD1	protein_coding	34.8142	-1.61812	0.34101	-4.74509	2.08411e-06	2.41218e-05	Down Regulated in U937_PMA
ENSG00000142871	CCN1	protein_coding	3.19584	-1.61739	0.939975	-1.72067	0.0853104	0.233167	Non Significant
ENSG00000267140	ENSG00000267140	protein_coding	1.28402	-1.61342	1.56916	-1.02821	0.303853	0.59846	Non Significant
ENSG00000125965	GDF5	protein_coding	1.88557	-1.61338	1.2478	-1.29298	0.196018	0.435748	Non Significant
ENSG00000174697	LEP	protein_coding	0.583489	-1.61315	3.02296	-0.533633	0.593595	0.921319	Non Significant
ENSG00000104549	SQLE	protein_coding	4622.84	-1.61243	0.127169	-12.6795	7.68548e-37	1.89024e-34	Down Regulated in U937_PMA
ENSG00000185842	DNAH14	protein_coding	105.383	-1.61112	0.922731	-1.74604	0.0808047	0.223648	Non Significant
ENSG00000273398	ENSG00000273398	protein_coding	6.4418	-1.60918	1.23098	-1.30723	0.191134	0.428381	Non Significant
ENSG00000140254	DUOXA1	protein_coding	2.5768	-1.60812	1.33399	-1.20549	0.228013	0.486935	Non Significant
ENSG00000173250	GPR151	protein_coding	3.33687	-1.60655	0.939266	-1.71043	0.0871865	0.237306	Non Significant
ENSG00000163141	BNIPL	protein_coding	15.8203	-1.60628	0.687535	-2.33629	0.0194759	0.0714141	Non Significant
ENSG00000175699	CCDC197	protein_coding	0.237038	-1.60435	4.22517	-0.379714	0.704158	1	Non Significant
ENSG00000091656	ZFHX4	protein_coding	5.55546	-1.60108	1.47731	-1.08379	0.278459	0.560774	Non Significant
ENSG00000288864	ARHGAP11A-SCG5	protein_coding	62.7178	-1.59743	0.619193	-2.57986	0.00988416	0.0409089	Down Regulated in U937_PMA
ENSG00000205863	C1QTNF9B	protein_coding	0.810507	-1.59642	1.82927	-0.872707	0.382823	0.699909	Non Significant
ENSG00000157570	TSPAN18	protein_coding	73.4379	-1.59075	0.511205	-3.11176	0.00185976	0.00984386	Down Regulated in U937_PMA
ENSG00000156486	KCNS2	protein_coding	1.36552	-1.58997	2.13207	-0.74574	0.455824	0.785221	Non Significant
ENSG00000116761	CTH	protein_coding	399.891	-1.58995	0.152006	-10.4598	1.32162e-25	1.58562e-23	Down Regulated in U937_PMA
ENSG00000133136	GNG5B	protein_coding	2.19154	-1.58928	1.19192	-1.33338	0.182408	0.414105	Non Significant
ENSG00000132622	HSPA12B	protein_coding	30.4215	-1.58554	0.363863	-4.35752	1.31544e-05	0.000126503	Down Regulated in U937_PMA
ENSG00000158270	COLEC12	protein_coding	1.02613	-1.58532	2.50653	-0.632474	0.527077	0.857404	Non Significant
ENSG00000101194	SLC17A9	protein_coding	1420.28	-1.58445	0.190843	-8.30238	1.02042e-16	5.3257e-15	Down Regulated in U937_PMA
ENSG00000101812	H2BW2	protein_coding	0.280548	-1.58441	4.22169	-0.375303	0.707435	1	Non Significant
ENSG00000092621	PHGDH	protein_coding	8825.91	-1.5844	0.220624	-7.18143	6.89873e-13	2.39399e-11	Down Regulated in U937_PMA
ENSG00000167513	CDT1	protein_coding	1856.57	-1.58357	0.200992	-7.87878	3.30584e-15	1.48168e-13	Down Regulated in U937_PMA
ENSG00000286098	ENSG00000286098	protein_coding	15.6084	-1.58316	0.879746	-1.79956	0.07193	0.203874	Non Significant
ENSG00000154920	EME1	protein_coding	662.892	-1.57883	0.176684	-8.93593	4.03769e-19	2.63065e-17	Down Regulated in U937_PMA
ENSG00000155158	TTC39B	protein_coding	160.721	-1.57873	0.309958	-5.09338	3.51741e-07	4.833e-06	Down Regulated in U937_PMA
ENSG00000177455	CD19	protein_coding	33.0016	-1.57808	0.601014	-2.62569	0.00864725	0.0365585	Down Regulated in U937_PMA
ENSG00000254852	NPIPA2	protein_coding	16.7107	-1.57698	0.64557	-2.44278	0.0145748	0.0560762	Non Significant
ENSG00000228727	SAPCD1	protein_coding	54.1247	-1.5769	0.383483	-4.11203	3.92189e-05	0.000335218	Down Regulated in U937_PMA
ENSG00000183760	ACP7	protein_coding	2.97286	-1.57572	1.4858	-1.06052	0.288906	0.575823	Non Significant
ENSG00000270757	HSPE1-MOB4	protein_coding	53.4957	-1.57419	0.637472	-2.46943	0.0135327	0.0529363	Non Significant
ENSG00000270617	URGCP-MRPS24	protein_coding	5.80423	-1.56935	0.880239	-1.78287	0.0746069	0.209709	Non Significant
ENSG00000132031	MATN3	protein_coding	0.379265	-1.56932	4.23109	-0.370903	0.71071	1	Non Significant
ENSG00000175093	SPSB4	protein_coding	3.36969	-1.56678	0.950694	-1.64804	0.0993454	0.261501	Non Significant
ENSG00000258653	ENSG00000258653	protein_coding	12.2243	-1.56552	0.723675	-2.16329	0.0305191	0.102631	Non Significant
ENSG00000103257	SLC7A5	protein_coding	18153	-1.56514	0.122336	-12.7938	1.77526e-37	4.59606e-35	Down Regulated in U937_PMA
ENSG00000267179	ENSG00000267179	protein_coding	4.78917	-1.5651	0.908759	-1.72224	0.0850267	0.232521	Non Significant
ENSG00000165076	PRSS37	protein_coding	6.79835	-1.56244	0.565603	-2.76243	0.00573732	0.0258265	Down Regulated in U937_PMA
ENSG00000174343	CHRNA9	protein_coding	0.63579	-1.56204	2.95283	-0.528998	0.596807	0.923464	Non Significant
ENSG00000116183	PAPPA2	protein_coding	11.3476	-1.56129	0.751676	-2.07708	0.0377946	0.122169	Non Significant
ENSG00000166897	ELFN2	protein_coding	156.402	-1.56051	0.359266	-4.34362	1.40155e-05	0.000134064	Down Regulated in U937_PMA
ENSG00000130222	GADD45G	protein_coding	1.31289	-1.56026	2.63284	-0.592616	0.553438	0.88238	Non Significant
ENSG00000117399	CDC20	protein_coding	2144.6	-1.55806	0.183186	-8.50538	1.81006e-17	1.01756e-15	Down Regulated in U937_PMA
ENSG00000283787	PRR33	protein_coding	87.2511	-1.55763	0.393536	-3.95802	7.55723e-05	0.000596693	Down Regulated in U937_PMA
ENSG00000113248	PCDHB15	protein_coding	1.81813	-1.55542	1.22588	-1.26882	0.204504	0.450394	Non Significant
ENSG00000160161	CILP2	protein_coding	8.84427	-1.55517	0.756333	-2.0562	0.0397636	0.126888	Non Significant
ENSG00000088899	LZTS3	protein_coding	108.111	-1.55473	0.270718	-5.74301	9.30104e-09	1.71e-07	Down Regulated in U937_PMA
ENSG00000136160	EDNRB	protein_coding	0.550158	-1.55409	3.49338	-0.444868	0.656415	0.972855	Non Significant
ENSG00000006459	KDM7A	protein_coding	953.192	-1.55205	0.271719	-5.71194	1.11693e-08	2.02178e-07	Down Regulated in U937_PMA
ENSG00000213722	DDAH2	protein_coding	332.366	-1.55121	0.229618	-6.7556	1.42248e-11	4.10136e-10	Down Regulated in U937_PMA
ENSG00000125775	SDCBP2	protein_coding	250.068	-1.55106	0.179855	-8.62393	6.46927e-18	3.81106e-16	Down Regulated in U937_PMA
ENSG00000162595	DIRAS3	protein_coding	0.83078	-1.54955	2.8893	-0.536307	0.591746	0.919539	Non Significant
ENSG00000122870	BICC1	protein_coding	0.971179	-1.54915	1.8628	-0.831621	0.405623	0.725879	Non Significant
ENSG00000213694	S1PR3	protein_coding	506.732	-1.54598	0.301134	-5.13387	2.83837e-07	3.96646e-06	Down Regulated in U937_PMA
ENSG00000172425	TTC36	protein_coding	2.43639	-1.54377	1.51406	-1.01962	0.30791	0.604514	Non Significant
ENSG00000185955	SPACDR	protein_coding	35.6242	-1.54332	0.317627	-4.8589	1.18042e-06	1.44171e-05	Down Regulated in U937_PMA
ENSG00000232810	TNF	protein_coding	44.1676	-1.54223	0.549473	-2.80674	0.00500457	0.0229373	Down Regulated in U937_PMA
ENSG00000167371	PRRT2	protein_coding	6.2026	-1.53833	0.964005	-1.59577	0.110541	0.284018	Non Significant
ENSG00000133661	SFTPD	protein_coding	0.360968	-1.53802	4.22574	-0.363964	0.715885	1	Non Significant
ENSG00000258223	PRSS58	protein_coding	0.131432	-1.53392	4.23758	-0.361981	0.717366	1	Non Significant
ENSG00000187492	CDHR4	protein_coding	6.60033	-1.53061	0.704594	-2.17233	0.0298308	0.100695	Non Significant
ENSG00000288698	ENSG00000288698	protein_coding	2.44031	-1.53038	1.28155	-1.19416	0.232415	0.493524	Non Significant
ENSG00000168003	SLC3A2	protein_coding	7386.19	-1.53016	0.141651	-10.8023	3.35572e-27	4.37266e-25	Down Regulated in U937_PMA
ENSG00000175197	DDIT3	protein_coding	287.951	-1.52984	0.226409	-6.75697	1.40907e-11	4.07119e-10	Down Regulated in U937_PMA
ENSG00000205143	ARID3C	protein_coding	33.7478	-1.52938	0.314637	-4.86078	1.16924e-06	1.42894e-05	Down Regulated in U937_PMA
ENSG00000103269	RHBDL1	protein_coding	27.4357	-1.5267	0.447402	-3.41236	0.000644026	0.00393719	Down Regulated in U937_PMA
ENSG00000101331	CCM2L	protein_coding	31.4711	-1.52583	0.600927	-2.53913	0.0111128	0.0449537	Down Regulated in U937_PMA
ENSG00000137309	HMGA1	protein_coding	9221.18	-1.52524	0.121251	-12.5792	2.74781e-36	6.59341e-34	Down Regulated in U937_PMA
ENSG00000171133	OR2K2	protein_coding	0.261785	-1.52486	4.24137	-0.35952	0.719206	1	Non Significant
ENSG00000289565	ENSG00000289565	protein_coding	1.90816	-1.52472	2.00703	-0.759691	0.447439	0.775393	Non Significant
ENSG00000109107	ALDOC	protein_coding	90.639	-1.52458	0.361545	-4.21685	2.47741e-05	0.000222786	Down Regulated in U937_PMA
ENSG00000107831	FGF8	protein_coding	1.5614	-1.52382	1.6735	-0.910559	0.362528	0.675483	Non Significant
ENSG00000105376	ICAM5	protein_coding	38.3429	-1.52294	0.554718	-2.74542	0.0060433	0.0269794	Down Regulated in U937_PMA
ENSG00000249715	FER1L5	protein_coding	1.94266	-1.52277	1.58439	-0.961105	0.336499	0.64177	Non Significant
ENSG00000285815	GET1-SH3BGR	protein_coding	11.1841	-1.52258	1.02169	-1.49026	0.136157	0.332219	Non Significant
ENSG00000273513	TBC1D3K	protein_coding	0.442943	-1.52241	4.20298	-0.362221	0.717187	1	Non Significant
ENSG00000128272	ATF4	protein_coding	8643.27	-1.51987	0.090342	-16.8235	1.64044e-63	1.15276e-60	Down Regulated in U937_PMA
ENSG00000111711	GOLT1B	protein_coding	1226.59	-1.51742	0.157715	-9.62126	6.50265e-22	5.33109e-20	Down Regulated in U937_PMA
ENSG00000070669	ASNS	protein_coding	2063.09	-1.51721	0.189912	-7.98905	1.35984e-15	6.41637e-14	Down Regulated in U937_PMA
ENSG00000188038	NRN1L	protein_coding	1.99068	-1.51637	1.08108	-1.40265	0.160721	0.376605	Non Significant
ENSG00000105650	PDE4C	protein_coding	6.22731	-1.51596	0.842541	-1.79927	0.0719764	0.203976	Non Significant
ENSG00000006071	ABCC8	protein_coding	3.93575	-1.51089	2.00254	-0.754487	0.450557	0.778465	Non Significant
ENSG00000275743	TRBV14	TR_V_gene	0.150621	-1.51007	4.23592	-0.356492	0.721472	1	Non Significant
ENSG00000140505	CYP1A2	protein_coding	0.895786	-1.50912	2.34698	-0.643005	0.520221	0.851782	Non Significant
ENSG00000275714	H3C1	protein_coding	1.63016	-1.50803	1.1323	-1.33183	0.182918	0.414833	Non Significant
ENSG00000177614	PGBD5	protein_coding	234.667	-1.50742	0.316392	-4.76442	1.89394e-06	2.21158e-05	Down Regulated in U937_PMA
ENSG00000165548	TMEM63C	protein_coding	179.632	-1.50612	0.698114	-2.15741	0.0309739	0.103841	Non Significant
ENSG00000101222	SPEF1	protein_coding	4.44788	-1.50378	0.732021	-2.05428	0.0399487	0.127396	Non Significant
ENSG00000182168	UNC5C	protein_coding	446.004	-1.50203	0.188567	-7.9655	1.64561e-15	7.67276e-14	Down Regulated in U937_PMA
ENSG00000269533	ENSG00000269533	protein_coding	1.91137	-1.50181	1.12454	-1.33549	0.181715	0.413028	Non Significant
ENSG00000269891	ARHGAP19-SLIT1	protein_coding	0.627796	-1.50093	2.4353	-0.616324	0.537681	0.867734	Non Significant
ENSG00000290263	ENSG00000290263	protein_coding	87.7599	-1.5004	0.466372	-3.21718	0.00129456	0.00719544	Down Regulated in U937_PMA
ENSG00000196436	NPIPB15	protein_coding	125.596	-1.49993	0.278689	-5.38209	7.36276e-08	1.14522e-06	Non Significant
ENSG00000067208	EVI5	protein_coding	256.336	-1.49876	0.184164	-8.13823	4.01114e-16	1.98299e-14	Non Significant
ENSG00000235007	ENSG00000235007	protein_coding	0.314793	-1.49811	4.20585	-0.356197	0.721693	1	Non Significant
ENSG00000102683	SGCG	protein_coding	0.824821	-1.49659	2.02664	-0.73846	0.460235	0.789157	Non Significant
ENSG00000156427	FGF18	protein_coding	7.90432	-1.49597	0.778764	-1.92095	0.0547377	0.164243	Non Significant
ENSG00000115257	PCSK4	protein_coding	87.4646	-1.4956	0.337341	-4.43349	9.27181e-06	9.26992e-05	Non Significant
ENSG00000248235	ENSG00000248235	protein_coding	0.608836	-1.49526	2.43843	-0.613205	0.539741	0.869669	Non Significant
ENSG00000196345	ZKSCAN7	protein_coding	0.491328	-1.49067	2.47052	-0.603382	0.546255	0.875277	Non Significant
ENSG00000099822	HCN2	protein_coding	3.11479	-1.48961	1.10453	-1.34864	0.177454	0.40581	Non Significant
ENSG00000139998	RAB15	protein_coding	20.374	-1.48891	0.476538	-3.12443	0.00178149	0.00950194	Non Significant
ENSG00000043355	ZIC2	protein_coding	0.735648	-1.48569	2.19923	-0.67555	0.499326	0.829582	Non Significant
ENSG00000285625	ENSG00000285625	protein_coding	5.47017	-1.48553	0.763497	-1.94569	0.051692	0.157055	Non Significant
ENSG00000172146	OR1A1	protein_coding	0.92768	-1.48493	2.58501	-0.574439	0.56567	0.894058	Non Significant
ENSG00000215186	GOLGA6B	protein_coding	8.82288	-1.48411	0.667821	-2.22231	0.026262	0.0909419	Non Significant
ENSG00000075461	CACNG4	protein_coding	1.88004	-1.48066	1.45723	-1.01608	0.309593	0.606487	Non Significant
ENSG00000131068	DEFB118	protein_coding	0.536187	-1.47792	4.15709	-0.355518	0.722202	1	Non Significant
ENSG00000108242	CYP2C18	protein_coding	1.30396	-1.4763	2.04563	-0.721688	0.470486	0.799455	Non Significant
ENSG00000167281	RBFOX3	protein_coding	7.67131	-1.47404	0.672425	-2.19212	0.0283707	0.0967224	Non Significant
ENSG00000112599	GUCA1B	protein_coding	76.4712	-1.46945	0.328677	-4.47082	7.79214e-06	7.95219e-05	Non Significant
ENSG00000126562	WNK4	protein_coding	49.0616	-1.46661	0.493818	-2.96994	0.00297857	0.0147512	Non Significant
ENSG00000278677	H2AC17	protein_coding	5.74696	-1.46586	0.698303	-2.09918	0.0358012	0.116694	Non Significant
ENSG00000055118	KCNH2	protein_coding	9.46537	-1.46407	0.705006	-2.07667	0.0378316	0.122225	Non Significant
ENSG00000183960	KCNH8	protein_coding	3.19006	-1.46248	1.30901	-1.11724	0.263891	0.53942	Non Significant
ENSG00000180251	SLC9A4	protein_coding	0.900553	-1.46112	1.91162	-0.764337	0.444666	0.772515	Non Significant
ENSG00000060566	CREB3L3	protein_coding	31.1911	-1.4595	0.263901	-5.53049	3.19339e-08	5.36118e-07	Non Significant
ENSG00000255835	ENSG00000255835	protein_coding	5.94922	-1.45896	1.25329	-1.1641	0.244382	0.511933	Non Significant
ENSG00000101187	SLCO4A1	protein_coding	702.867	-1.45806	0.248606	-5.86493	4.49324e-09	8.8e-08	Non Significant
ENSG00000143850	PLEKHA6	protein_coding	6.71864	-1.45737	1.00194	-1.45455	0.145793	0.349789	Non Significant
ENSG00000158747	NBL1	protein_coding	9.52913	-1.45684	0.487703	-2.98715	0.00281591	0.0140695	Non Significant
ENSG00000164741	DLC1	protein_coding	3.76262	-1.45575	3.46732	-0.419849	0.674596	0.987071	Non Significant
ENSG00000124107	SLPI	protein_coding	29.0855	-1.45394	0.34112	-4.26224	2.02386e-05	0.000186517	Non Significant
ENSG00000145423	SFRP2	protein_coding	1.15853	-1.44974	2.4669	-0.587675	0.55675	0.885365	Non Significant
ENSG00000205795	CYS1	protein_coding	19.0716	-1.44579	0.34629	-4.17509	2.97874e-05	0.0002635	Non Significant
ENSG00000216588	IGSF23	protein_coding	0.27237	-1.4455	4.22978	-0.341745	0.732543	1	Non Significant
ENSG00000076826	CAMSAP3	protein_coding	12.7263	-1.44409	0.534039	-2.70409	0.00684912	0.0300007	Non Significant
ENSG00000183251	OR51B4	protein_coding	0.122289	-1.44376	4.23939	-0.340558	0.733436	1	Non Significant
ENSG00000179914	ITLN1	protein_coding	0.681273	-1.44374	1.77003	-0.815661	0.414694	0.736619	Non Significant
ENSG00000174946	GPR171	protein_coding	1.55173	-1.44187	2.46771	-0.584293	0.559023	0.887688	Non Significant
ENSG00000197213	ZSCAN5B	protein_coding	1.98015	-1.43898	0.947851	-1.51814	0.128978	0.318655	Non Significant
ENSG00000284820	ENSG00000284820	protein_coding	49.65	-1.43522	0.373301	-3.84469	0.000120707	0.00089287	Non Significant
ENSG00000015592	STMN4	protein_coding	0.921489	-1.43457	2.46995	-0.58081	0.561369	0.889761	Non Significant
ENSG00000267127	ENSG00000267127	protein_coding	9.75771	-1.43102	0.680289	-2.10355	0.0354176	0.115645	Non Significant
ENSG00000158528	PPP1R9A	protein_coding	3.33266	-1.43033	1.97601	-0.723848	0.469159	0.798337	Non Significant
ENSG00000143036	SLC44A3	protein_coding	1.28302	-1.42947	1.93371	-0.739236	0.459764	0.788556	Non Significant
ENSG00000272395	IFNL4	protein_coding	0.197345	-1.42835	4.24075	-0.336815	0.736257	1	Non Significant
ENSG00000186509	OR9Q1	protein_coding	0.297877	-1.42613	4.23972	-0.336373	0.736589	1	Non Significant
ENSG00000184163	C1QTNF12	protein_coding	14.8842	-1.42595	0.434781	-3.2797	0.00103918	0.00590781	Non Significant
ENSG00000188163	FAM166A	protein_coding	1.27095	-1.42588	1.63329	-0.873006	0.38266	0.699806	Non Significant
ENSG00000168060	NAALADL1	protein_coding	10.3126	-1.42524	0.971641	-1.46684	0.142419	0.343412	Non Significant
ENSG00000101336	HCK	protein_coding	3796.42	-1.42523	0.139641	-10.2064	1.85665e-24	1.93288e-22	Non Significant
ENSG00000172410	INSL5	protein_coding	0.167841	-1.42516	4.23989	-0.336132	0.736772	1	Non Significant
ENSG00000100448	CTSG	protein_coding	11384.7	-1.42461	0.226587	-6.28724	3.23156e-10	7.69784e-09	Non Significant
ENSG00000277075	H2AC8	protein_coding	1.12211	-1.42368	1.41886	-1.0034	0.315669	0.614292	Non Significant
ENSG00000131471	AOC3	protein_coding	79.1899	-1.42022	0.35987	-3.94648	7.93086e-05	0.000621951	Non Significant
ENSG00000079819	EPB41L2	protein_coding	2.95741	-1.4198	1.51091	-0.939697	0.347373	0.655689	Non Significant
ENSG00000104918	RETN	protein_coding	522.415	-1.4139	0.306624	-4.61117	4.004e-06	4.36712e-05	Non Significant
ENSG00000204839	MROH6	protein_coding	249.541	-1.41329	0.283072	-4.99268	5.95475e-07	7.75932e-06	Non Significant
ENSG00000182585	EPGN	protein_coding	0.670342	-1.41282	2.85111	-0.495531	0.620225	0.94316	Non Significant
ENSG00000165462	PHOX2A	protein_coding	0.568406	-1.41246	4.12062	-0.342778	0.731766	1	Non Significant
ENSG00000134202	GSTM3	protein_coding	1.78117	-1.41223	2.65879	-0.531157	0.59531	0.922382	Non Significant
ENSG00000146166	LGSN	protein_coding	1.3613	-1.41064	3.19519	-0.44149	0.658858	0.974544	Non Significant
ENSG00000179580	RNF151	protein_coding	0.597369	-1.40865	2.98324	-0.47219	0.636791	0.956949	Non Significant
ENSG00000129007	CALML4	protein_coding	285.345	-1.40739	0.153748	-9.1539	5.49134e-20	3.87267e-18	Non Significant
ENSG00000105219	CCNP	protein_coding	13.271	-1.40645	0.750173	-1.87484	0.0608148	0.17897	Non Significant
ENSG00000129596	CDO1	protein_coding	0.968648	-1.40388	2.08309	-0.67394	0.500349	0.830761	Non Significant
ENSG00000289685	ENSG00000289685	protein_coding	0.784958	-1.40179	4.07585	-0.343927	0.730901	1	Non Significant
ENSG00000177669	MBOAT4	protein_coding	2.27682	-1.39976	1.10735	-1.26406	0.206209	0.452911	Non Significant
ENSG00000046604	DSG2	protein_coding	0.697332	-1.39881	3.36477	-0.415721	0.677614	0.989369	Non Significant
ENSG00000178726	THBD	protein_coding	204.404	-1.3964	0.196556	-7.10432	1.20914e-12	4.09485e-11	Non Significant
ENSG00000198723	TEX45	protein_coding	5.20222	-1.3963	0.795338	-1.75561	0.0791558	0.219795	Non Significant
ENSG00000121904	CSMD2	protein_coding	3.39009	-1.39627	1.65545	-0.843438	0.398984	0.718173	Non Significant
ENSG00000182747	SLC35D3	protein_coding	1.4713	-1.39412	2.31052	-0.603379	0.546256	0.875277	Non Significant
ENSG00000171617	ENC1	protein_coding	509.274	-1.3941	0.217485	-6.41012	1.4541e-10	3.63081e-09	Non Significant
ENSG00000267041	ZNF850	protein_coding	165.913	-1.39395	0.235896	-5.90916	3.43852e-09	6.8478e-08	Non Significant
ENSG00000273706	LHX1	protein_coding	1.55033	-1.3934	1.6623	-0.838237	0.401898	0.721588	Non Significant
ENSG00000113722	CDX1	protein_coding	0.664502	-1.3931	2.0899	-0.666587	0.505036	0.836174	Non Significant
ENSG00000074219	TEAD2	protein_coding	8.35318	-1.39283	0.675136	-2.06303	0.0391095	0.12537	Non Significant
ENSG00000241962	ENSG00000241962	protein_coding	10.6474	-1.39157	0.87496	-1.59044	0.111736	0.286563	Non Significant
ENSG00000258539	ENSG00000258539	protein_coding	11.281	-1.3913	0.45348	-3.06804	0.00215467	0.011183	Non Significant
ENSG00000205307	SAP25	protein_coding	76.5443	-1.3912	0.4012	-3.4676	0.000525137	0.00330643	Non Significant
ENSG00000163624	CDS1	protein_coding	17.9587	-1.38964	0.530932	-2.61737	0.00886111	0.0373423	Non Significant
ENSG00000172780	RAB43	protein_coding	102.382	-1.38877	0.322266	-4.30938	1.6371e-05	0.000153608	Non Significant
ENSG00000288684	ENSG00000288684	protein_coding	115.375	-1.38871	0.549792	-2.52589	0.0115406	0.0463605	Non Significant
ENSG00000111087	GLI1	protein_coding	59.466	-1.38732	0.465811	-2.9783	0.00289851	0.0144018	Non Significant
ENSG00000242732	RTL5	protein_coding	10.697	-1.38728	0.532798	-2.60376	0.00922085	0.0385701	Non Significant
ENSG00000099194	SCD	protein_coding	18103.9	-1.38707	0.128849	-10.7651	5.03306e-27	6.38907e-25	Non Significant
ENSG00000259417	CTXND1	protein_coding	12.5586	-1.38677	0.444434	-3.12031	0.00180659	0.00960976	Non Significant
ENSG00000197506	SLC28A3	protein_coding	159.882	-1.38511	0.322373	-4.29661	1.73427e-05	0.000161799	Non Significant
ENSG00000125144	MT1G	protein_coding	383.938	-1.38505	0.275918	-5.01979	5.17283e-07	6.82176e-06	Non Significant
ENSG00000105808	RASA4	protein_coding	651.444	-1.38312	0.251352	-5.50273	3.7395e-08	6.2144e-07	Non Significant
ENSG00000243501	ENSG00000243501	protein_coding	0.582535	-1.38133	3.6495	-0.378499	0.70506	1	Non Significant
ENSG00000173389	IQCF1	protein_coding	1.02549	-1.37995	1.58304	-0.87171	0.383366	0.700382	Non Significant
ENSG00000101323	HAO1	protein_coding	0.521286	-1.37866	4.23299	-0.325695	0.744655	1	Non Significant
ENSG00000240583	AQP1	protein_coding	1.83416	-1.37345	1.39563	-0.984105	0.325064	0.627301	Non Significant
ENSG00000134398	ERN2	protein_coding	1.25659	-1.37305	2.68084	-0.512172	0.608531	0.933821	Non Significant
ENSG00000169710	FASN	protein_coding	5528.45	-1.37151	0.160423	-8.54929	1.23847e-17	7.08375e-16	Non Significant
ENSG00000180921	FAM83H	protein_coding	2.29996	-1.3709	2.37879	-0.576301	0.564412	0.892786	Non Significant
ENSG00000287080	H3C3	protein_coding	1.48901	-1.3707	1.39177	-0.984859	0.324693	0.626708	Non Significant
ENSG00000211694	TRGV10	TR_V_gene	1.10717	-1.37057	2.17607	-0.62984	0.528799	0.858831	Non Significant
ENSG00000183317	EPHA10	protein_coding	5.29043	-1.37006	1.50821	-0.908398	0.363668	0.676902	Non Significant
ENSG00000277200	CCDC92B	protein_coding	3.66572	-1.36912	1.07332	-1.27559	0.2021	0.446399	Non Significant
ENSG00000129951	PLPPR3	protein_coding	404.34	-1.36289	0.208205	-6.54589	5.91435e-11	1.56202e-09	Non Significant
ENSG00000131686	CA6	protein_coding	1.50661	-1.36274	1.63319	-0.834405	0.404053	0.723767	Non Significant
ENSG00000188710	QRFP	protein_coding	2.4797	-1.3625	1.08649	-1.25403	0.209831	0.458331	Non Significant
ENSG00000183196	CHST6	protein_coding	4.38093	-1.36172	0.860507	-1.58247	0.113543	0.289534	Non Significant
ENSG00000092758	COL9A3	protein_coding	89.8818	-1.36159	0.276756	-4.91983	8.66213e-07	1.09254e-05	Non Significant
ENSG00000288669	ENSG00000288669	protein_coding	2.25214	-1.36077	1.3225	-1.02893	0.303512	0.597968	Non Significant
ENSG00000110619	CARS1	protein_coding	2499.98	-1.36068	0.0800465	-16.9986	8.40908e-65	6.61828e-62	Non Significant
ENSG00000126583	PRKCG	protein_coding	2.5651	-1.35837	1.41219	-0.961886	0.336107	0.641427	Non Significant
ENSG00000187840	EIF4EBP1	protein_coding	2568.99	-1.35756	0.197918	-6.85923	6.9233e-12	2.11198e-10	Non Significant
ENSG00000204659	CBY3	protein_coding	1.64566	-1.35683	2.19008	-0.619535	0.535564	0.865311	Non Significant
ENSG00000134684	YARS1	protein_coding	8860.08	-1.3566	0.0899334	-15.0845	2.04672e-51	9.46455e-49	Non Significant
ENSG00000175183	CSRP2	protein_coding	17.3941	-1.35642	0.353838	-3.83344	0.000126364	0.000930518	Non Significant
ENSG00000232070	TMEM253	protein_coding	2.22677	-1.35454	1.38404	-0.978686	0.327735	0.630942	Non Significant
ENSG00000162775	RBM15	protein_coding	836.081	-1.35405	0.23044	-5.87595	4.20436e-09	8.25598e-08	Non Significant
ENSG00000090861	AARS1	protein_coding	7036.87	-1.35258	0.0981174	-13.7853	3.12501e-43	1.13866e-40	Non Significant
ENSG00000259522	ENSG00000259522	protein_coding	13.0246	-1.35116	1.15044	-1.17447	0.240207	0.505812	Non Significant
ENSG00000160285	LSS	protein_coding	1870.34	-1.35109	0.143264	-9.43079	4.07027e-21	3.15302e-19	Non Significant
ENSG00000146700	SSC4D	protein_coding	36.9588	-1.35067	0.407531	-3.31427	0.000918839	0.00532207	Non Significant
ENSG00000173338	KCNK7	protein_coding	3.8401	-1.35018	0.850065	-1.58833	0.112212	0.287485	Non Significant
ENSG00000102837	OLFM4	protein_coding	0.227906	-1.3501	4.24148	-0.318308	0.750251	1	Non Significant
ENSG00000188060	RAB42	protein_coding	18.6121	-1.34886	0.409479	-3.29408	0.000987461	0.00565133	Non Significant
ENSG00000187837	H1-2	protein_coding	80.5437	-1.34639	0.237167	-5.67698	1.37096e-08	2.44561e-07	Non Significant
ENSG00000095739	BAMBI	protein_coding	190.683	-1.34535	0.198441	-6.77957	1.20534e-11	3.52395e-10	Non Significant
ENSG00000183921	SDR42E2	protein_coding	1.48819	-1.34449	1.50089	-0.895793	0.370364	0.685667	Non Significant
ENSG00000130176	CNN1	protein_coding	4.10197	-1.34353	1.04446	-1.28634	0.198325	0.439343	Non Significant
ENSG00000152292	SH2D6	protein_coding	2.53745	-1.34282	0.857966	-1.56512	0.117556	0.297285	Non Significant
ENSG00000132535	DLG4	protein_coding	419.567	-1.34217	0.223374	-6.00863	1.87096e-09	3.9e-08	Non Significant
ENSG00000186943	OR13C8	protein_coding	0.153782	-1.34144	4.24241	-0.316197	0.751853	1	Non Significant
ENSG00000004399	PLXND1	protein_coding	2628.53	-1.34113	0.134098	-10.0011	1.50711e-23	1.46031e-21	Non Significant
ENSG00000171163	ZNF692	protein_coding	618.67	-1.34069	0.159713	-8.39438	4.68377e-17	2.4975e-15	Non Significant
ENSG00000105281	SLC1A5	protein_coding	7709.37	-1.33979	0.159982	-8.37463	5.53957e-17	2.94585e-15	Non Significant
ENSG00000169242	EFNA1	protein_coding	1.81554	-1.33927	1.56769	-0.854298	0.39294	0.711072	Non Significant
ENSG00000141505	ASGR1	protein_coding	8.81198	-1.33889	0.557047	-2.40355	0.0162369	0.0613791	Non Significant
ENSG00000102349	KLF8	protein_coding	15.9796	-1.33741	0.526954	-2.53801	0.0111485	0.0450613	Non Significant
ENSG00000154265	ABCA5	protein_coding	1.32129	-1.33689	2.64493	-0.505453	0.613241	0.937539	Non Significant
ENSG00000130045	NXNL2	protein_coding	1.33409	-1.33678	1.88709	-0.708384	0.478707	0.807738	Non Significant
ENSG00000182901	RGS7	protein_coding	1.89769	-1.33518	2.26637	-0.58913	0.555774	0.884585	Non Significant
ENSG00000160183	TMPRSS3	protein_coding	2.79986	-1.33494	1.02772	-1.29893	0.193968	0.43281	Non Significant
ENSG00000141748	ARL5C	protein_coding	0.840932	-1.3339	2.23124	-0.59783	0.549953	0.878987	Non Significant
ENSG00000025434	NR1H3	protein_coding	252.479	-1.33375	0.252945	-5.27287	1.34304e-07	2.00955e-06	Non Significant
ENSG00000185972	CCIN	protein_coding	1.21132	-1.33354	1.91408	-0.696701	0.48599	0.81562	Non Significant
ENSG00000119614	VSX2	protein_coding	0.609572	-1.33227	3.45416	-0.385701	0.699718	1	Non Significant
ENSG00000130066	SAT1	protein_coding	2485.29	-1.33051	0.159948	-8.31834	8.92047e-17	4.70561e-15	Non Significant
ENSG00000162129	CLPB	protein_coding	1593.82	-1.32876	0.152592	-8.70792	3.0951e-18	1.85104e-16	Non Significant
ENSG00000150961	SEC24D	protein_coding	2536.46	-1.32871	0.115662	-11.4879	1.51696e-30	2.40707e-28	Non Significant
ENSG00000178623	GPR35	protein_coding	393.542	-1.32826	0.224655	-5.91245	3.37061e-09	6.73301e-08	Non Significant
ENSG00000124678	TCP11	protein_coding	3.47953	-1.32784	0.770902	-1.72246	0.0849869	0.232444	Non Significant
ENSG00000109113	RAB34	protein_coding	3.838	-1.32613	0.932627	-1.42193	0.155047	0.366672	Non Significant
ENSG00000106344	RBM28	protein_coding	988.495	-1.32525	0.145414	-9.11361	7.96872e-20	5.54037e-18	Non Significant
ENSG00000065361	ERBB3	protein_coding	7.45927	-1.32464	0.882157	-1.50159	0.133204	0.326513	Non Significant
ENSG00000255054	ENSG00000255054	protein_coding	0.437168	-1.32458	2.89517	-0.457513	0.647302	0.965238	Non Significant
ENSG00000269526	ERVV-1	protein_coding	0.299291	-1.32455	4.24216	-0.312235	0.754862	1	Non Significant
ENSG00000203943	SAMD13	protein_coding	81.2275	-1.32447	0.253397	-5.22686	1.7241e-07	2.51471e-06	Non Significant
ENSG00000187848	P2RX2	protein_coding	1.70331	-1.32419	1.25375	-1.05619	0.290882	0.578706	Non Significant
ENSG00000134571	MYBPC3	protein_coding	10.6185	-1.32419	0.484211	-2.73474	0.00624303	0.0277286	Non Significant
ENSG00000173212	MAB21L3	protein_coding	14.873	-1.32361	0.541626	-2.44378	0.0145345	0.0559539	Non Significant
ENSG00000285130	ENSG00000285130	protein_coding	48.7276	-1.32356	0.527356	-2.50979	0.0120802	0.0481791	Non Significant
ENSG00000159289	GOLGA6A	protein_coding	1.981	-1.32249	1.04206	-1.26911	0.204403	0.450264	Non Significant
ENSG00000184210	DGAT2L6	protein_coding	4.50182	-1.32241	1.48895	-0.888147	0.374462	0.690079	Non Significant
ENSG00000167653	PSCA	protein_coding	14.3613	-1.32201	0.641902	-2.05953	0.0394438	0.126031	Non Significant
ENSG00000232434	AJM1	protein_coding	86.6108	-1.32067	0.309917	-4.26136	2.03187e-05	0.000187168	Non Significant
ENSG00000166123	GPT2	protein_coding	1333.71	-1.31815	0.182775	-7.21186	5.51915e-13	1.93919e-11	Non Significant
ENSG00000189143	CLDN4	protein_coding	39.2821	-1.31814	0.309819	-4.25454	2.09478e-05	0.000191974	Non Significant
ENSG00000259305	ZHX1-C8orf76	protein_coding	49.5565	-1.3173	0.351445	-3.74825	0.000178073	0.00125853	Non Significant
ENSG00000196365	LONP1	protein_coding	4797.08	-1.31565	0.136042	-9.67092	4.00758e-22	3.39884e-20	Non Significant
ENSG00000274183	H2AB1	protein_coding	3.40792	-1.31499	1.09854	-1.19703	0.231296	0.491878	Non Significant
ENSG00000116132	PRRX1	protein_coding	1.63529	-1.31474	1.30371	-1.00846	0.313234	0.611125	Non Significant
ENSG00000268643	ENSG00000268643	protein_coding	0.527996	-1.31291	3.65162	-0.359542	0.71919	1	Non Significant
ENSG00000156299	TIAM1	protein_coding	157.167	-1.31187	0.524565	-2.50087	0.0123888	0.0491851	Non Significant
ENSG00000185640	KRT79	protein_coding	28.6544	-1.31013	1.13141	-1.15796	0.246879	0.515449	Non Significant
ENSG00000073067	CYP2W1	protein_coding	1.27296	-1.31005	2.246	-0.583281	0.559704	0.888124	Non Significant
ENSG00000196415	PRTN3	protein_coding	1360.58	-1.30988	0.362591	-3.61255	0.000303196	0.00201612	Non Significant
ENSG00000131355	ADGRE3	protein_coding	5.92838	-1.30982	1.33864	-0.978474	0.32784	0.631048	Non Significant
ENSG00000177294	FBXO39	protein_coding	11.6759	-1.30956	0.589332	-2.2221	0.0262764	0.0909594	Non Significant
ENSG00000114923	SLC4A3	protein_coding	3.50076	-1.30843	1.4764	-0.886225	0.375496	0.691138	Non Significant
ENSG00000144712	CAND2	protein_coding	4.06981	-1.30746	0.773279	-1.6908	0.0908742	0.244903	Non Significant
ENSG00000178035	IMPDH2	protein_coding	6312.98	-1.30651	0.170763	-7.65101	1.99414e-14	8.34824e-13	Non Significant
ENSG00000169575	VPREB1	protein_coding	0.226609	-1.30637	4.24329	-0.307868	0.758183	1	Non Significant
ENSG00000155313	USP25	protein_coding	34.1063	-1.30595	0.473174	-2.75999	0.00578033	0.0260082	Non Significant
ENSG00000075290	WNT8B	protein_coding	11.5623	-1.30337	0.499459	-2.60957	0.00906573	0.0380521	Non Significant
ENSG00000091536	MYO15A	protein_coding	13.0516	-1.30321	0.937845	-1.38957	0.164658	0.383622	Non Significant
ENSG00000177606	JUN	protein_coding	855.02	-1.30256	0.249268	-5.22554	1.73652e-07	2.52908e-06	Non Significant
ENSG00000257767	ENSG00000257767	protein_coding	4.03755	-1.3009	0.898353	-1.4481	0.14759	0.353404	Non Significant
ENSG00000176383	B3GNT4	protein_coding	82.6023	-1.30072	0.273668	-4.75291	2.00512e-06	2.33034e-05	Non Significant
ENSG00000102230	PCYT1B	protein_coding	176.034	-1.30067	0.134312	-9.68397	3.5274e-22	3.01761e-20	Non Significant
ENSG00000111199	TRPV4	protein_coding	0.996589	-1.30006	3.01237	-0.431575	0.66605	0.979609	Non Significant
ENSG00000113389	NPR3	protein_coding	9.71092	-1.29985	0.737157	-1.76333	0.0778455	0.216769	Non Significant
ENSG00000165175	MID1IP1	protein_coding	4525.79	-1.29948	0.128593	-10.1054	5.22927e-24	5.27646e-22	Non Significant
ENSG00000223510	CDRT15	protein_coding	1.32997	-1.29858	1.27656	-1.01724	0.309038	0.605882	Non Significant
ENSG00000101000	PROCR	protein_coding	339.008	-1.29834	0.209188	-6.20659	5.4147e-10	1.244e-08	Non Significant
ENSG00000116783	TNNI3K	protein_coding	1.6331	-1.29823	1.48423	-0.874681	0.381747	0.698852	Non Significant
ENSG00000131069	ACSS2	protein_coding	870.926	-1.29742	0.110981	-11.6904	1.42632e-31	2.37832e-29	Non Significant
ENSG00000116574	RHOU	protein_coding	870.091	-1.29607	0.0956859	-13.5451	8.47416e-42	2.82606e-39	Non Significant
ENSG00000164199	ADGRV1	protein_coding	3.83511	-1.29547	1.6693	-0.776059	0.437714	0.764397	Non Significant
ENSG00000119326	CTNNAL1	protein_coding	1025.43	-1.29108	0.138395	-9.32893	1.06946e-20	7.88117e-19	Non Significant
ENSG00000253304	TMEM200B	protein_coding	1.63833	-1.29025	1.65375	-0.7802	0.435273	0.761314	Non Significant
ENSG00000164604	GPR85	protein_coding	178.329	-1.2895	0.288139	-4.47525	7.6321e-06	7.80505e-05	Non Significant
ENSG00000175322	ZNF519	protein_coding	462.773	-1.28917	0.202522	-6.3656	1.94523e-10	4.75458e-09	Non Significant
ENSG00000068831	RASGRP2	protein_coding	776.433	-1.28817	0.155581	-8.27977	1.23415e-16	6.40718e-15	Non Significant
ENSG00000132465	JCHAIN	protein_coding	0.925553	-1.28801	1.32201	-0.97428	0.329918	0.633667	Non Significant
ENSG00000213085	CFAP45	protein_coding	15.6909	-1.28782	0.360568	-3.57164	0.000354754	0.00231975	Non Significant
ENSG00000158553	POM121L2	protein_coding	0.406388	-1.2875	2.78343	-0.462559	0.643681	0.962464	Non Significant
ENSG00000276953	TRBV12-4	TR_V_gene	0.167158	-1.28628	4.24494	-0.303014	0.761879	1	Non Significant
ENSG00000182199	SHMT2	protein_coding	8824.55	-1.28616	0.158858	-8.09627	5.66693e-16	2.76681e-14	Non Significant
ENSG00000010030	ETV7	protein_coding	2.29573	-1.2841	0.902239	-1.42324	0.154668	0.366039	Non Significant
ENSG00000088827	SIGLEC1	protein_coding	122.924	-1.28387	0.535723	-2.39652	0.0165514	0.0623999	Non Significant
ENSG00000244588	RAD21L1	protein_coding	2.78253	-1.28351	1.00983	-1.27102	0.203722	0.449174	Non Significant
ENSG00000157020	SEC13	protein_coding	2914.01	-1.2835	0.109256	-11.7476	7.26473e-32	1.22172e-29	Non Significant
ENSG00000198715	GLMP	protein_coding	157.447	-1.28168	1.03509	-1.23822	0.215633	0.46732	Non Significant
ENSG00000242441	GTF2A1L	protein_coding	0.14106	-1.28006	4.23839	-0.302017	0.762639	1	Non Significant
ENSG00000163817	SLC6A20	protein_coding	9.72052	-1.2785	0.578811	-2.20884	0.0271857	0.0935011	Non Significant
ENSG00000268083	ENSG00000268083	protein_coding	0.338043	-1.27819	4.2075	-0.303788	0.761289	1	Non Significant
ENSG00000256825	ENSG00000256825	protein_coding	0.302181	-1.27735	4.21006	-0.303404	0.761582	1	Non Significant
ENSG00000198883	PNMA5	protein_coding	5.04007	-1.27656	0.742931	-1.71828	0.0857457	0.234161	Non Significant
ENSG00000092607	TBX15	protein_coding	5.19419	-1.27532	0.781103	-1.63272	0.102529	0.267766	Non Significant
ENSG00000129194	SOX15	protein_coding	8.8875	-1.27438	0.639427	-1.993	0.0462615	0.143413	Non Significant
ENSG00000156970	BUB1B	protein_coding	2103.9	-1.27411	0.1423	-8.9537	3.43755e-19	2.25458e-17	Non Significant
ENSG00000121335	PRB2	protein_coding	0.641175	-1.27275	2.17276	-0.585778	0.558025	0.886554	Non Significant
ENSG00000150656	CNDP1	protein_coding	5.10888	-1.27155	0.823707	-1.5437	0.122661	0.306357	Non Significant
ENSG00000184575	XPOT	protein_coding	6522.11	-1.27141	0.148654	-8.55278	1.20158e-17	6.89279e-16	Non Significant
ENSG00000221996	OR52B4	protein_coding	0.378444	-1.2698	3.33864	-0.380335	0.703697	1	Non Significant
ENSG00000157343	ARMC12	protein_coding	34.3208	-1.26879	0.227754	-5.5709	2.5342e-08	4.3134e-07	Non Significant
ENSG00000130635	COL5A1	protein_coding	5.04496	-1.26782	1.21341	-1.04484	0.296097	0.586176	Non Significant
ENSG00000104879	CKM	protein_coding	1.16893	-1.26701	1.77865	-0.712345	0.476251	0.805183	Non Significant
ENSG00000147166	ITGB1BP2	protein_coding	11.147	-1.26619	0.549383	-2.30475	0.0211808	0.0763004	Non Significant
ENSG00000196517	SLC6A9	protein_coding	2.06923	-1.26581	1.23798	-1.02248	0.306552	0.602269	Non Significant
ENSG00000140044	JDP2	protein_coding	916.808	-1.26569	0.164592	-7.68986	1.47298e-14	6.24622e-13	Non Significant
ENSG00000132563	REEP2	protein_coding	0.457588	-1.2654	2.19548	-0.576365	0.564369	0.892786	Non Significant
ENSG00000170667	RASA4B	protein_coding	293.493	-1.26453	0.293101	-4.31431	1.60104e-05	0.000150584	Non Significant
ENSG00000121905	HPCA	protein_coding	14.1431	-1.26359	0.402835	-3.13675	0.00170833	0.00915142	Non Significant
ENSG00000104804	TULP2	protein_coding	2.10254	-1.26204	1.96959	-0.640765	0.521675	0.852532	Non Significant
ENSG00000173404	INSM1	protein_coding	31.8674	-1.26141	0.755098	-1.67052	0.0948164	0.252929	Non Significant
ENSG00000273003	ARL2-SNX15	protein_coding	1.6465	-1.26137	2.63235	-0.47918	0.63181	0.952897	Non Significant
ENSG00000130768	SMPDL3B	protein_coding	4.87794	-1.25983	0.733483	-1.7176	0.0858689	0.234465	Non Significant
ENSG00000131188	PRR7	protein_coding	71.5636	-1.25896	0.251033	-5.01512	5.3e-07	6.97095e-06	Non Significant
ENSG00000188385	JAKMIP3	protein_coding	44.1558	-1.25853	0.289527	-4.34685	1.38104e-05	0.000132219	Non Significant
ENSG00000256966	ENSG00000256966	protein_coding	10.0133	-1.25808	1.12099	-1.12229	0.261738	0.536453	Non Significant
ENSG00000139656	SMIM2	protein_coding	0.866204	-1.2543	3.18596	-0.393695	0.693806	1	Non Significant
ENSG00000178187	ZNF454	protein_coding	1.11686	-1.25312	3.56625	-0.351383	0.725301	1	Non Significant
ENSG00000106565	TMEM176B	protein_coding	0.22027	-1.25312	4.24263	-0.295364	0.767716	1	Non Significant
ENSG00000204305	AGER	protein_coding	80.1519	-1.25289	0.352988	-3.54939	0.000386125	0.00249832	Non Significant
ENSG00000091640	SPAG7	protein_coding	534.931	-1.25237	0.146989	-8.52016	1.59338e-17	8.9832e-16	Non Significant
ENSG00000156885	COX6A2	protein_coding	0.0978947	-1.25179	4.24487	-0.294895	0.768074	1	Non Significant
ENSG00000127743	IL17B	protein_coding	3.623	-1.25058	1.24303	-1.00607	0.314381	0.612799	Non Significant
ENSG00000198156	NPIPB6	protein_coding	29.6008	-1.24871	0.409292	-3.05091	0.0022815	0.0117467	Non Significant
ENSG00000105426	PTPRS	protein_coding	4.22967	-1.24783	0.934988	-1.33459	0.182009	0.41347	Non Significant
ENSG00000233932	CTXN2	protein_coding	0.486262	-1.24723	4.24286	-0.293959	0.768789	1	Non Significant
ENSG00000107165	TYRP1	protein_coding	34.3469	-1.2466	0.344256	-3.62113	0.000293314	0.00196101	Non Significant
ENSG00000289701	ENSG00000289701	protein_coding	120.675	-1.24507	0.266688	-4.66864	3.03193e-06	3.38379e-05	Non Significant
ENSG00000152670	DDX4	protein_coding	6.14243	-1.24383	0.576189	-2.15873	0.0308713	0.103585	Non Significant
ENSG00000127863	TNFRSF19	protein_coding	15.7208	-1.24227	1.23079	-1.00932	0.31282	0.610659	Non Significant
ENSG00000282988	ENSG00000282988	protein_coding	20.0868	-1.24164	0.451151	-2.75217	0.00592025	0.0265225	Non Significant
ENSG00000100167	SEPTIN3	protein_coding	409.435	-1.2412	0.343173	-3.61683	0.000298233	0.00198916	Non Significant
ENSG00000149418	ST14	protein_coding	1.653	-1.2404	1.16245	-1.06706	0.285945	0.571437	Non Significant
ENSG00000163931	TKT	protein_coding	10797.5	-1.23966	0.183956	-6.73888	1.59611e-11	4.56468e-10	Non Significant
ENSG00000140107	SLC25A47	protein_coding	1.00732	-1.23932	1.51813	-0.816345	0.414303	0.736377	Non Significant
ENSG00000262461	SPDYE9	protein_coding	2.54903	-1.23753	1.7289	-0.715788	0.474122	0.802618	Non Significant
ENSG00000111181	SLC6A12	protein_coding	767.925	-1.23419	0.886865	-1.39164	0.164033	0.382678	Non Significant
ENSG00000205704	SMIM45	protein_coding	9.34673	-1.23311	0.517165	-2.38437	0.0171083	0.0642287	Non Significant
ENSG00000152229	PSTPIP2	protein_coding	117.646	-1.23202	0.313981	-3.92388	8.71336e-05	0.00067469	Non Significant
ENSG00000160867	FGFR4	protein_coding	19.7031	-1.23068	0.503804	-2.44278	0.0145746	0.0560762	Non Significant
ENSG00000165383	LRRC18	protein_coding	0.844801	-1.22941	1.7914	-0.686286	0.492533	0.822065	Non Significant
ENSG00000100075	SLC25A1	protein_coding	1112.05	-1.22874	0.176412	-6.9652	3.27937e-12	1.04748e-10	Non Significant
ENSG00000184916	JAG2	protein_coding	121.075	-1.2287	0.330874	-3.7135	0.000204409	0.00142438	Non Significant
ENSG00000074276	CDHR2	protein_coding	7.99427	-1.22846	0.803651	-1.5286	0.126363	0.313652	Non Significant
ENSG00000272573	MUSTN1	protein_coding	6.76626	-1.22649	1.27355	-0.963046	0.335524	0.640763	Non Significant
ENSG00000164708	PGAM2	protein_coding	5.87042	-1.2261	1.02842	-1.19222	0.233175	0.494391	Non Significant
ENSG00000265818	EEF1E1-BLOC1S5	protein_coding	1.63646	-1.2254	1.28317	-0.954978	0.339589	0.645954	Non Significant
ENSG00000157653	C9orf43	protein_coding	13.928	-1.22522	0.381522	-3.2114	0.00132091	0.00731913	Non Significant
ENSG00000162433	AK4	protein_coding	396.468	-1.22476	0.179965	-6.80557	1.00652e-11	2.96916e-10	Non Significant
ENSG00000120156	TEK	protein_coding	2.09195	-1.22369	1.07137	-1.14217	0.253384	0.524136	Non Significant
ENSG00000174326	SLC16A11	protein_coding	4.52596	-1.2236	0.79044	-1.548	0.121623	0.304498	Non Significant
ENSG00000125726	CD70	protein_coding	172.967	-1.22304	0.178878	-6.83727	8.07139e-12	2.45081e-10	Non Significant
ENSG00000180988	OR52N2	protein_coding	0.629589	-1.22176	3.01056	-0.405824	0.684872	0.994138	Non Significant
ENSG00000188818	ZDHHC11	protein_coding	106.766	-1.22167	0.311602	-3.92062	8.83212e-05	0.000681761	Non Significant
ENSG00000250374	TRIM75	protein_coding	0.40486	-1.22115	2.92266	-0.417823	0.676076	0.988271	Non Significant
ENSG00000183598	H3C13	protein_coding	0.721082	-1.22024	1.585	-0.769868	0.441378	0.769021	Non Significant
ENSG00000272822	ENSG00000272822	protein_coding	45.1629	-1.21877	0.304573	-4.00156	6.29273e-05	0.000507649	Non Significant
ENSG00000152578	GRIA4	protein_coding	7.19228	-1.21842	0.73913	-1.64846	0.099259	0.261448	Non Significant
ENSG00000167994	RAB3IL1	protein_coding	203.321	-1.21777	0.299744	-4.0627	4.85087e-05	0.000402215	Non Significant
ENSG00000260007	ENSG00000260007	protein_coding	346.877	-1.21715	0.158406	-7.68375	1.54496e-14	6.53733e-13	Non Significant
ENSG00000144668	ITGA9	protein_coding	29.9269	-1.21624	0.493415	-2.46494	0.0137035	0.0534449	Non Significant
ENSG00000284395	PERCC1	protein_coding	1.90878	-1.21537	1.43619	-0.846242	0.397418	0.716604	Non Significant
ENSG00000124216	SNAI1	protein_coding	29.838	-1.21477	0.475193	-2.55638	0.0105769	0.0431765	Non Significant
ENSG00000018280	SLC11A1	protein_coding	14.8033	-1.21473	0.472255	-2.57219	0.0101058	0.0416685	Non Significant
ENSG00000106105	GARS1	protein_coding	8541.32	-1.21446	0.0913777	-13.2906	2.62631e-40	8.33472e-38	Non Significant
ENSG00000186480	INSIG1	protein_coding	5442.61	-1.21403	0.124277	-9.76879	1.53277e-22	1.3585e-20	Non Significant
ENSG00000170075	GPR37L1	protein_coding	2.43734	-1.21317	1.33903	-0.906005	0.364933	0.678615	Non Significant
ENSG00000144843	ADPRH	protein_coding	2.1155	-1.21234	1.12658	-1.07613	0.281869	0.565406	Non Significant
ENSG00000104369	JPH1	protein_coding	1.0949	-1.21227	2.6068	-0.465042	0.641902	0.96048	Non Significant
ENSG00000143512	HHIPL2	protein_coding	1.67443	-1.21123	1.46234	-0.828284	0.40751	0.728262	Non Significant
ENSG00000132837	DMGDH	protein_coding	31.0264	-1.2105	0.373604	-3.24006	0.00119503	0.00668788	Non Significant
ENSG00000129946	SHC2	protein_coding	7.04609	-1.21047	1.0456	-1.15768	0.246994	0.515524	Non Significant
ENSG00000065485	PDIA5	protein_coding	463.597	-1.21005	0.141728	-8.53787	1.36724e-17	7.75266e-16	Non Significant
ENSG00000079459	FDFT1	protein_coding	9674.22	-1.2094	0.129337	-9.35073	8.70421e-21	6.48727e-19	Non Significant
ENSG00000097096	SYDE2	protein_coding	56.6748	-1.20935	0.24995	-4.83837	1.30912e-06	1.57929e-05	Non Significant
ENSG00000103023	PRSS54	protein_coding	2.14831	-1.20794	1.95648	-0.617405	0.536968	0.867009	Non Significant
ENSG00000167110	GOLGA2	protein_coding	980.452	-1.20688	0.198635	-6.07586	1.23323e-09	2.67236e-08	Non Significant
ENSG00000196787	H2AC11	protein_coding	11.5296	-1.20654	0.507827	-2.37589	0.0175067	0.0653617	Non Significant
ENSG00000033327	GAB2	protein_coding	1250.22	-1.20417	0.159354	-7.55659	4.1376e-14	1.66146e-12	Non Significant
ENSG00000197013	ZNF429	protein_coding	1.47629	-1.20264	2.05918	-0.584038	0.559195	0.887745	Non Significant
ENSG00000161298	ZNF382	protein_coding	43.1154	-1.20247	0.396886	-3.02978	0.00244735	0.0124976	Non Significant
ENSG00000129810	SGO1	protein_coding	487.739	-1.20215	0.166407	-7.22415	5.04258e-13	1.78129e-11	Non Significant
ENSG00000082556	OPRK1	protein_coding	369.836	-1.20142	0.219319	-5.47795	4.3e-08	7.04356e-07	Non Significant
ENSG00000106772	PRUNE2	protein_coding	42.0012	-1.20028	0.328709	-3.6515	0.000260713	0.00176281	Non Significant
ENSG00000135094	SDS	protein_coding	113.471	-1.2001	0.243354	-4.93148	8.16081e-07	1.03195e-05	Non Significant
ENSG00000104826	LHB	protein_coding	0.505103	-1.19977	2.29448	-0.522895	0.601047	0.926891	Non Significant
ENSG00000136840	ST6GALNAC4	protein_coding	198.178	-1.19931	0.276361	-4.33964	1.42717e-05	0.000136316	Non Significant
ENSG00000136425	CIB2	protein_coding	80.6662	-1.19924	0.541371	-2.2152	0.0267466	0.0923058	Non Significant
ENSG00000136457	CHAD	protein_coding	25.1151	-1.19891	0.371885	-3.22388	0.00126468	0.00704125	Non Significant
ENSG00000071575	TRIB2	protein_coding	1306.58	-1.19779	0.242683	-4.93559	7.9907e-07	1.0124e-05	Non Significant
ENSG00000167306	MYO5B	protein_coding	11.5348	-1.19717	0.876972	-1.36512	0.172216	0.396505	Non Significant
ENSG00000164088	PPM1M	protein_coding	245.027	-1.19608	0.159215	-7.51235	5.80735e-14	2.2991e-12	Non Significant
ENSG00000166922	SCG5	protein_coding	79.6363	-1.19416	0.314169	-3.80101	0.00014411	0.00104593	Non Significant
ENSG00000101004	NINL	protein_coding	44.6883	-1.19213	0.322306	-3.69875	0.000216666	0.00149799	Non Significant
ENSG00000170893	TRH	protein_coding	0.452989	-1.19017	2.46238	-0.48334	0.628855	0.950333	Non Significant
ENSG00000204899	MZT1	protein_coding	2357.86	-1.18908	0.121677	-9.77248	1.47783e-22	1.31573e-20	Non Significant
ENSG00000186334	SLC36A3	protein_coding	0.706577	-1.18725	2.58568	-0.459165	0.646116	0.964346	Non Significant
ENSG00000204618	RNF39	protein_coding	115.684	-1.18582	0.261745	-4.53044	5.88607e-06	6.16689e-05	Non Significant
ENSG00000275713	H2BC9	protein_coding	3.24034	-1.18339	0.686573	-1.72362	0.0847768	0.231934	Non Significant
ENSG00000213937	CLDN9	protein_coding	57.5164	-1.18308	0.337204	-3.50849	0.000450663	0.00287804	Non Significant
ENSG00000168477	TNXB	protein_coding	53.9903	-1.18035	0.641027	-1.84135	0.0655709	0.190024	Non Significant
ENSG00000154102	C16orf74	protein_coding	193.521	-1.17972	0.217886	-5.41441	6.14902e-08	9.7571e-07	Non Significant
ENSG00000144583	MARCHF4	protein_coding	1.32147	-1.17956	2.33962	-0.504169	0.614143	0.937971	Non Significant
ENSG00000135119	RNFT2	protein_coding	93.6319	-1.17694	0.485696	-2.4232	0.0153843	0.0586858	Non Significant
ENSG00000268107	ENSG00000268107	protein_coding	93.8015	-1.17652	0.325803	-3.61115	0.000304844	0.00202502	Non Significant
ENSG00000116678	LEPR	protein_coding	314.586	-1.17624	0.18023	-6.52633	6.74028e-11	1.76359e-09	Non Significant
ENSG00000047457	CP	protein_coding	26.356	-1.17553	0.735467	-1.59834	0.109967	0.282839	Non Significant
ENSG00000174950	CD164L2	protein_coding	0.510333	-1.1751	3.5825	-0.328012	0.742903	1	Non Significant
ENSG00000187808	SOWAHD	protein_coding	108.662	-1.17456	0.241263	-4.86837	1.12521e-06	1.38199e-05	Non Significant
ENSG00000153495	TEX29	protein_coding	2.06349	-1.17376	1.12155	-1.04655	0.295307	0.585083	Non Significant
ENSG00000188227	ZNF793	protein_coding	5.23648	-1.17361	1.07702	-1.08968	0.275856	0.556862	Non Significant
ENSG00000159915	ZNF233	protein_coding	11.3011	-1.17271	0.501071	-2.3404	0.0192632	0.0707924	Non Significant
ENSG00000257138	TAS2R38	protein_coding	0.361668	-1.17164	2.97959	-0.393222	0.694156	1	Non Significant
ENSG00000255152	MSH5-SAPCD1	protein_coding	305.271	-1.17102	0.349431	-3.35121	0.000804596	0.00476845	Non Significant
ENSG00000185899	TAS2R60	protein_coding	1.18754	-1.17084	1.51228	-0.77422	0.438801	0.765615	Non Significant
ENSG00000169994	MYO7B	protein_coding	42.7314	-1.17074	0.969969	-1.20699	0.227437	0.486085	Non Significant
ENSG00000251322	SHANK3	protein_coding	5.78597	-1.16907	1.57052	-0.744384	0.456644	0.78614	Non Significant
ENSG00000073712	FERMT2	protein_coding	12.2608	-1.16801	0.725793	-1.60929	0.107553	0.277932	Non Significant
ENSG00000124191	TOX2	protein_coding	2.06602	-1.16794	1.79427	-0.650928	0.515093	0.846573	Non Significant
ENSG00000180596	H2BC4	protein_coding	22.1207	-1.16786	0.442358	-2.64007	0.00828891	0.035254	Non Significant
ENSG00000179111	HES7	protein_coding	22.8097	-1.16671	0.554554	-2.10387	0.0353899	0.115616	Non Significant
ENSG00000126895	AVPR2	protein_coding	14.6096	-1.16544	0.642759	-1.81318	0.069804	0.199255	Non Significant
ENSG00000149124	GLYAT	protein_coding	1.4833	-1.16479	1.05319	-1.10597	0.268741	0.546368	Non Significant
ENSG00000177721	ANXA2R	protein_coding	2406.13	-1.16452	0.210726	-5.52624	3.27173e-08	5.46937e-07	Non Significant
ENSG00000100033	PRODH	protein_coding	6.28795	-1.16311	1.06089	-1.09635	0.272925	0.552476	Non Significant
ENSG00000270885	RASL10B	protein_coding	0.644493	-1.16254	1.96357	-0.592054	0.553815	0.882531	Non Significant
ENSG00000117543	DPH5	protein_coding	563.482	-1.16209	0.204361	-5.68648	1.3e-08	2.32604e-07	Non Significant
ENSG00000186994	KANK3	protein_coding	30.7904	-1.16113	0.423504	-2.74171	0.00611207	0.027233	Non Significant
ENSG00000152284	TCF7L1	protein_coding	16.9901	-1.16047	0.613177	-1.89256	0.0584161	0.173154	Non Significant
ENSG00000175985	PLEKHD1	protein_coding	8.82775	-1.15972	0.473857	-2.4474	0.0143889	0.0555457	Non Significant
ENSG00000196150	ZNF250	protein_coding	269.65	-1.15971	0.168961	-6.86378	6.70631e-12	2.05535e-10	Non Significant
ENSG00000013573	DDX11	protein_coding	892.75	-1.15963	0.187085	-6.19841	5.70358e-10	1.3e-08	Non Significant
ENSG00000186567	CEACAM19	protein_coding	102.398	-1.1594	0.291902	-3.97189	7.13052e-05	0.000567328	Non Significant
ENSG00000151917	BEND6	protein_coding	20.2925	-1.15932	0.353865	-3.27615	0.00105231	0.00597383	Non Significant
ENSG00000176454	LPCAT4	protein_coding	1213.56	-1.15829	0.1488	-7.78417	7.01707e-15	3.04786e-13	Non Significant
ENSG00000140932	CMTM2	protein_coding	14.1114	-1.15795	0.453865	-2.55131	0.0107319	0.0436581	Non Significant
ENSG00000080493	SLC4A4	protein_coding	2.57242	-1.15129	2.12629	-0.541455	0.588194	0.915754	Non Significant
ENSG00000272162	ENSG00000272162	protein_coding	1.24343	-1.15059	2.13009	-0.540159	0.589087	0.91671	Non Significant
ENSG00000079337	RAPGEF3	protein_coding	153.043	-1.15019	0.215681	-5.33284	9.66865e-08	1.47817e-06	Non Significant
ENSG00000110492	MDK	protein_coding	63.2358	-1.14986	0.334928	-3.43315	0.000596602	0.00370074	Non Significant
ENSG00000204410	MSH5	protein_coding	688.323	-1.14942	0.240622	-4.77686	1.78052e-06	2.08657e-05	Non Significant
ENSG00000171425	ZNF581	protein_coding	445.466	-1.14884	0.187147	-6.13868	8.3211e-10	1.84584e-08	Non Significant
ENSG00000130159	ECSIT	protein_coding	915.552	-1.1481	0.21137	-5.43172	5.58138e-08	8.93566e-07	Non Significant
ENSG00000167965	MLST8	protein_coding	1747.51	-1.14792	0.197983	-5.79805	6.70891e-09	1.26617e-07	Non Significant
ENSG00000111215	PRR4	protein_coding	25.0505	-1.14782	0.430656	-2.66529	0.00769229	0.0331262	Non Significant
ENSG00000107018	RLN1	protein_coding	0.437519	-1.14761	4.23101	-0.271238	0.786208	1	Non Significant
ENSG00000168350	DEGS2	protein_coding	20.7717	-1.14681	0.434261	-2.64083	0.0082702	0.0351837	Non Significant
ENSG00000134250	NOTCH2	protein_coding	3325.8	-1.14599	0.212777	-5.38588	7.2093e-08	1.12487e-06	Non Significant
ENSG00000166159	LRTM2	protein_coding	4.27711	-1.14564	0.74472	-1.53835	0.123964	0.308868	Non Significant
ENSG00000119698	PPP4R4	protein_coding	39.8214	-1.14532	0.34431	-3.32641	0.000879724	0.00513177	Non Significant
ENSG00000278259	MYO19	protein_coding	1206.71	-1.14488	0.125106	-9.15129	5.62582e-20	3.95335e-18	Non Significant
ENSG00000103485	QPRT	protein_coding	414.365	-1.14416	0.176922	-6.46705	9.9935e-11	2.567e-09	Non Significant
ENSG00000156171	DRAM2	protein_coding	1656.11	-1.14384	0.156014	-7.33168	2.2728e-13	8.2814e-12	Non Significant
ENSG00000266728	ENSG00000266728	protein_coding	3.61837	-1.14344	0.792798	-1.44228	0.149223	0.356455	Non Significant
ENSG00000274211	SOCS7	protein_coding	1212.32	-1.14269	0.267968	-4.2643	2.0053e-05	0.000184893	Non Significant
ENSG00000088179	PTPN4	protein_coding	569.743	-1.1421	0.242849	-4.7029	2.56492e-06	2.91046e-05	Non Significant
ENSG00000088881	EBF4	protein_coding	50.1503	-1.14193	0.298579	-3.82454	0.000131019	0.000959051	Non Significant
ENSG00000171119	NRTN	protein_coding	4.23228	-1.14089	0.854884	-1.33455	0.182022	0.41347	Non Significant
ENSG00000158887	MPZ	protein_coding	125.146	-1.13927	0.18976	-6.00374	1.92822e-09	4.01054e-08	Non Significant
ENSG00000100170	SLC5A1	protein_coding	1.11395	-1.1385	1.90457	-0.597774	0.549991	0.878987	Non Significant
ENSG00000184697	CLDN6	protein_coding	1.3498	-1.13792	1.61939	-0.702683	0.482253	0.811357	Non Significant
ENSG00000127241	MASP1	protein_coding	1.43661	-1.13757	2.44529	-0.465207	0.641783	0.96048	Non Significant
ENSG00000061337	LZTS1	protein_coding	162.504	-1.13722	0.221832	-5.12648	2.95215e-07	4.11377e-06	Non Significant
ENSG00000163072	NOSTRIN	protein_coding	11.6193	-1.1367	0.586011	-1.93973	0.0524123	0.158754	Non Significant
ENSG00000074803	SLC12A1	protein_coding	4.81718	-1.13579	0.95855	-1.18491	0.236054	0.49942	Non Significant
ENSG00000185633	NDUFA4L2	protein_coding	128.721	-1.13565	0.184291	-6.16226	7.17156e-10	1.60898e-08	Non Significant
ENSG00000162843	WDR64	protein_coding	1.59101	-1.13551	1.78293	-0.636882	0.524202	0.854248	Non Significant
ENSG00000186326	RGS9BP	protein_coding	32.7871	-1.13541	0.308114	-3.68504	0.000228663	0.00157204	Non Significant
ENSG00000053328	METTL24	protein_coding	3.55038	-1.13411	0.712358	-1.59206	0.111372	0.285817	Non Significant
ENSG00000132879	FBXO44	protein_coding	85.6863	-1.13318	0.950455	-1.19225	0.233163	0.494391	Non Significant
ENSG00000165731	RET	protein_coding	7.92268	-1.13315	0.841583	-1.34645	0.178156	0.407084	Non Significant
ENSG00000152932	RAB3C	protein_coding	115.317	-1.13308	0.262431	-4.31765	1.57696e-05	0.000148461	Non Significant
ENSG00000173207	CKS1B	protein_coding	1907.56	-1.13264	0.160334	-7.06425	1.61489e-12	5.37642e-11	Non Significant
ENSG00000279486	OR2AG1	protein_coding	0.492069	-1.13219	2.72297	-0.415791	0.677563	0.989369	Non Significant
ENSG00000289758	ENSG00000289758	protein_coding	2.20598	-1.13174	1.64637	-0.687412	0.491823	0.821347	Non Significant
ENSG00000196866	H2AC7	protein_coding	1.6153	-1.13156	2.44966	-0.461925	0.644135	0.962558	Non Significant
ENSG00000130656	HBZ	protein_coding	0.304078	-1.13028	4.10941	-0.275047	0.78328	1	Non Significant
ENSG00000163393	SLC22A15	protein_coding	355.939	-1.12923	0.147114	-7.67586	1.64317e-14	6.90834e-13	Non Significant
ENSG00000249319	ENSG00000249319	protein_coding	6.16473	-1.12708	0.735935	-1.5315	0.125646	0.312306	Non Significant
ENSG00000124466	LYPD3	protein_coding	2.98143	-1.1259	1.12454	-1.00122	0.316722	0.615732	Non Significant
ENSG00000072134	EPN2	protein_coding	1.55748	-1.12567	2.16255	-0.520528	0.602696	0.928037	Non Significant
ENSG00000112619	PRPH2	protein_coding	0.936875	-1.12483	1.79158	-0.627842	0.530108	0.860026	Non Significant
ENSG00000196550	FAM72A	protein_coding	339.932	-1.12332	0.173791	-6.46362	1.02225e-10	2.62241e-09	Non Significant
ENSG00000242252	BGLAP	protein_coding	6.17735	-1.12147	0.800545	-1.40088	0.161249	0.377437	Non Significant
ENSG00000104899	AMH	protein_coding	210.366	-1.12131	0.295563	-3.79381	0.000148355	0.00107239	Non Significant
ENSG00000143199	ADCY10	protein_coding	3.98244	-1.12114	0.979644	-1.14443	0.252444	0.522851	Non Significant
ENSG00000249992	TMEM158	protein_coding	537.946	-1.12113	0.203854	-5.49964	3.80563e-08	6.2924e-07	Non Significant
ENSG00000100300	TSPO	protein_coding	2729	-1.12112	0.25849	-4.3372	1.44312e-05	0.000137705	Non Significant
ENSG00000156234	CXCL13	protein_coding	0.122418	-1.12063	4.24503	-0.263986	0.791791	1	Non Significant
ENSG00000198355	PIM3	protein_coding	1016.37	-1.11828	0.246286	-4.54056	5.61047e-06	5.90646e-05	Non Significant
ENSG00000125337	KIF25	protein_coding	73.5948	-1.11799	0.278706	-4.01137	6.0368e-05	0.000489613	Non Significant
ENSG00000169155	ZBTB43	protein_coding	732.317	-1.11691	0.235307	-4.74659	2.06879e-06	2.39868e-05	Non Significant
ENSG00000109920	FNBP4	protein_coding	2058.34	-1.1166	0.182886	-6.10543	1e-09	2.2439e-08	Non Significant
ENSG00000115657	ABCB6	protein_coding	60.9085	-1.11645	0.426772	-2.61603	0.00889599	0.0374652	Non Significant
ENSG00000169100	SLC25A6	protein_coding	14311.8	-1.11642	0.185194	-6.02836	1.6563e-09	3.47806e-08	Non Significant
ENSG00000136828	RALGPS1	protein_coding	114.575	-1.11566	0.294774	-3.78479	0.000153837	0.00110835	Non Significant
ENSG00000109193	SULT1E1	protein_coding	0.284578	-1.11562	3.60217	-0.309708	0.756783	1	Non Significant
ENSG00000198729	PPP1R14C	protein_coding	357.652	-1.11524	0.130616	-8.53831	1.36204e-17	7.74554e-16	Non Significant
ENSG00000167676	PLIN4	protein_coding	53.9644	-1.11482	0.32983	-3.38	0.00072487	0.0043643	Non Significant
ENSG00000091138	SLC26A3	protein_coding	0.913159	-1.11443	3.2606	-0.341786	0.732512	1	Non Significant
ENSG00000164776	PHKG1	protein_coding	32.6425	-1.11383	0.341227	-3.2642	0.00109774	0.00620133	Non Significant
ENSG00000124370	MCEE	protein_coding	295.054	-1.11365	0.157843	-7.0554	1.72103e-12	5.70085e-11	Non Significant
ENSG00000170577	SIX2	protein_coding	0.74136	-1.11313	3.84579	-0.28944	0.772245	1	Non Significant
ENSG00000187961	KLHL17	protein_coding	193.795	-1.112	0.233363	-4.76509	1.88766e-06	2.20555e-05	Non Significant
ENSG00000161939	RNASEK-C17orf49	protein_coding	33.5263	-1.11082	0.364591	-3.04676	0.00231321	0.0118806	Non Significant
ENSG00000099954	CECR2	protein_coding	5.29275	-1.11034	1.67362	-0.663433	0.507053	0.838596	Non Significant
ENSG00000186188	FFAR4	protein_coding	0.619101	-1.10896	3.3915	-0.326982	0.743682	1	Non Significant
ENSG00000120254	MTHFD1L	protein_coding	1662.57	-1.10821	0.148671	-7.45411	9.04731e-14	3.46332e-12	Non Significant
ENSG00000204520	MICA	protein_coding	178.113	-1.10784	0.162734	-6.80768	9.91873e-12	2.93034e-10	Non Significant
ENSG00000170085	SIMC1	protein_coding	93.4402	-1.10764	0.626991	-1.76659	0.0772971	0.215638	Non Significant
ENSG00000198839	ZNF277	protein_coding	769.808	-1.10651	0.128402	-8.61751	6.84283e-18	4.01909e-16	Non Significant
ENSG00000130173	ANGPTL8	protein_coding	0.176871	-1.1063	4.24723	-0.260475	0.794497	1	Non Significant
ENSG00000276302	ENSG00000276302	protein_coding	3.75939	-1.10563	0.891457	-1.24025	0.214882	0.466081	Non Significant
ENSG00000136026	CKAP4	protein_coding	830.585	-1.10413	0.126423	-8.73365	2.46582e-18	1.49284e-16	Non Significant
ENSG00000124785	NRN1	protein_coding	1.82444	-1.10392	1.33862	-0.824669	0.409559	0.730913	Non Significant
ENSG00000177602	HASPIN	protein_coding	431.397	-1.10342	0.17655	-6.24991	4.10681e-10	9.63117e-09	Non Significant
ENSG00000204128	C2orf72	protein_coding	3.01651	-1.10221	1.63707	-0.673284	0.500767	0.831274	Non Significant
ENSG00000198734	F5	protein_coding	1.77559	-1.10215	1.31929	-0.835413	0.403485	0.723106	Non Significant
ENSG00000116731	PRDM2	protein_coding	1146.33	-1.10146	0.139702	-7.88439	3.16076e-15	1.41989e-13	Non Significant
ENSG00000179165	PXT1	protein_coding	8.87633	-1.10133	0.472076	-2.33294	0.0196511	0.0718689	Non Significant
ENSG00000128218	VPREB3	protein_coding	4.72851	-1.09979	0.769887	-1.42851	0.153145	0.363572	Non Significant
ENSG00000134152	KATNBL1	protein_coding	974.489	-1.0979	0.120453	-9.11471	7.8884e-20	5.50398e-18	Non Significant
ENSG00000198157	HMGN5	protein_coding	516.626	-1.09753	0.183695	-5.97473	2.30465e-09	4.74333e-08	Non Significant
ENSG00000288894	ENSG00000288894	protein_coding	3.41369	-1.09628	2.18061	-0.502739	0.615148	0.938631	Non Significant
ENSG00000187231	SESTD1	protein_coding	221.79	-1.09567	0.228226	-4.80081	1.58024e-06	1.88099e-05	Non Significant
ENSG00000166986	MARS1	protein_coding	5014.25	-1.09562	0.0588847	-18.6062	2.86076e-77	3.31108e-74	Non Significant
ENSG00000197483	ZNF628	protein_coding	152.448	-1.09562	0.325071	-3.37039	0.000750611	0.00449726	Non Significant
ENSG00000118514	ALDH8A1	protein_coding	52.2553	-1.09533	0.382948	-2.86027	0.00423277	0.0199244	Non Significant
ENSG00000182175	RGMA	protein_coding	28.7726	-1.09478	0.554098	-1.97579	0.048179	0.148259	Non Significant
ENSG00000164256	PRDM9	protein_coding	0.376029	-1.09473	4.2429	-0.258014	0.796396	1	Non Significant
ENSG00000276380	UBE2NL	protein_coding	1.17945	-1.0944	1.36572	-0.801337	0.422936	0.747346	Non Significant
ENSG00000181722	ZBTB20	protein_coding	57.6984	-1.0942	0.7653	-1.42976	0.152786	0.362981	Non Significant
ENSG00000168209	DDIT4	protein_coding	1039.73	-1.09415	0.210184	-5.20568	1.93285e-07	2.79022e-06	Non Significant
ENSG00000288721	ENSG00000288721	protein_coding	27.4411	-1.09396	0.478631	-2.2856	0.0222776	0.0794226	Non Significant
ENSG00000082512	TRAF5	protein_coding	69.5418	-1.09349	1.12908	-0.968475	0.332807	0.637318	Non Significant
ENSG00000136237	RAPGEF5	protein_coding	3.90255	-1.09326	1.58467	-0.689899	0.490257	0.819487	Non Significant
ENSG00000175591	P2RY2	protein_coding	351.989	-1.09235	0.179054	-6.10066	1.05631e-09	2.30676e-08	Non Significant
ENSG00000171989	LDHAL6B	protein_coding	4.47012	-1.09216	1.0801	-1.01116	0.31194	0.609709	Non Significant
ENSG00000213465	ARL2	protein_coding	607.038	-1.09182	0.206142	-5.29644	1.1808e-07	1.78171e-06	Non Significant
ENSG00000266086	ENSG00000266086	protein_coding	579.72	-1.08959	0.276756	-3.93701	8.25033e-05	0.00064367	Non Significant
ENSG00000105366	SIGLEC8	protein_coding	5.48058	-1.08907	0.591681	-1.84063	0.0656759	0.190147	Non Significant
ENSG00000214435	AS3MT	protein_coding	42.8463	-1.08756	0.601149	-1.80914	0.0704289	0.200573	Non Significant
ENSG00000176783	RUFY1	protein_coding	1378.02	-1.08732	0.0899325	-12.0904	1.18662e-33	2.407e-31	Non Significant
ENSG00000242852	ZNF709	protein_coding	1.52812	-1.08612	2.65336	-0.409338	0.682292	0.992266	Non Significant
ENSG00000117215	PLA2G2D	protein_coding	6.13804	-1.08462	0.528476	-2.05236	0.0401348	0.127865	Non Significant
ENSG00000256566	ENSG00000256566	protein_coding	5.46624	-1.08348	0.852652	-1.27072	0.203828	0.449357	Non Significant
ENSG00000109819	PPARGC1A	protein_coding	608.417	-1.08334	0.182699	-5.92966	3e-09	6.1261e-08	Non Significant
ENSG00000171860	C3AR1	protein_coding	953.914	-1.08315	0.524892	-2.06357	0.0390584	0.125296	Non Significant
ENSG00000130733	YIPF2	protein_coding	1369.13	-1.08284	0.15777	-6.86341	6.72369e-12	2.05747e-10	Non Significant
ENSG00000161958	FGF11	protein_coding	73.4156	-1.08106	0.277487	-3.8959	9.78335e-05	0.000746403	Non Significant
ENSG00000169208	OR10G3	protein_coding	0.33774	-1.08035	3.98533	-0.271081	0.786329	1	Non Significant
ENSG00000167604	NFKBID	protein_coding	430.251	-1.08025	0.228908	-4.71914	2.36848e-06	2.70628e-05	Non Significant
ENSG00000108342	CSF3	protein_coding	0.303162	-1.07988	4.24677	-0.254283	0.799277	1	Non Significant
ENSG00000104312	RIPK2	protein_coding	266.848	-1.07831	0.167871	-6.42345	1.33217e-10	3.34761e-09	Non Significant
ENSG00000197405	C5AR1	protein_coding	1120.02	-1.07766	0.315013	-3.421	0.000623913	0.00384229	Non Significant
ENSG00000085840	ORC1	protein_coding	1329.93	-1.0761	0.0851646	-12.6356	1.34422e-36	3.26529e-34	Non Significant
ENSG00000138658	ZGRF1	protein_coding	822.858	-1.07484	0.195404	-5.5006	3.78497e-08	6.2635e-07	Non Significant
ENSG00000167618	LAIR2	protein_coding	1.85524	-1.07237	1.18221	-0.907094	0.364357	0.677735	Non Significant
ENSG00000095464	PDE6C	protein_coding	2.52768	-1.07213	1.15427	-0.928842	0.352971	0.662823	Non Significant
ENSG00000181472	ZBTB2	protein_coding	844.679	-1.07207	0.150295	-7.13309	9.81432e-13	3.35838e-11	Non Significant
ENSG00000185499	MUC1	protein_coding	36.5274	-1.07195	0.424572	-2.52478	0.0115772	0.0464885	Non Significant
ENSG00000197106	SLC6A17	protein_coding	4.35938	-1.0702	1.09659	-0.975941	0.329094	0.632657	Non Significant
ENSG00000284713	SMIM38	protein_coding	39.4431	-1.06952	0.42229	-2.53266	0.0113201	0.0456421	Non Significant
ENSG00000176142	TMEM39A	protein_coding	1123.37	-1.0695	0.189488	-5.64418	1.65973e-08	2.91059e-07	Non Significant
ENSG00000139428	MMAB	protein_coding	447.534	-1.06885	0.229272	-4.66194	3.13246e-06	3.48807e-05	Non Significant
ENSG00000125384	PTGER2	protein_coding	676.274	-1.06765	0.145074	-7.35937	1.8478e-13	6.82127e-12	Non Significant
ENSG00000178177	LCORL	protein_coding	1625.63	-1.06648	0.119532	-8.92209	4.57588e-19	2.97145e-17	Non Significant
ENSG00000244694	PTCHD4	protein_coding	1.96548	-1.06611	2.48013	-0.42986	0.667298	0.980564	Non Significant
ENSG00000119125	GDA	protein_coding	0.503934	-1.06599	3.11104	-0.342648	0.731863	1	Non Significant
ENSG00000119684	MLH3	protein_coding	47.6163	-1.06427	0.38586	-2.75818	0.00581238	0.0261329	Non Significant
ENSG00000165752	STK32C	protein_coding	221.405	-1.06403	0.236075	-4.50718	6.56939e-06	6.80312e-05	Non Significant
ENSG00000105613	MAST1	protein_coding	139.934	-1.06339	0.2404	-4.42341	9.71572e-06	9.67442e-05	Non Significant
ENSG00000283228	ENSG00000283228	protein_coding	216.149	-1.06189	0.338999	-3.13242	0.00173373	0.00926477	Non Significant
ENSG00000183918	SH2D1A	protein_coding	1.95601	-1.06177	1.46287	-0.725811	0.467954	0.796912	Non Significant
ENSG00000180773	SLC36A4	protein_coding	487.874	-1.06149	0.214906	-4.93932	7.83938e-07	9.94627e-06	Non Significant
ENSG00000006652	IFRD1	protein_coding	1313.77	-1.06132	0.117738	-9.01427	1.98188e-19	1.3309e-17	Non Significant
ENSG00000134824	FADS2	protein_coding	6181.88	-1.06111	0.115913	-9.15442	5.46512e-20	3.86805e-18	Non Significant
ENSG00000136872	ALDOB	protein_coding	3.33327	-1.06009	1.08843	-0.973965	0.330074	0.633799	Non Significant
ENSG00000274386	TMEM269	protein_coding	52.8735	-1.05965	0.400279	-2.64727	0.00811452	0.0346638	Non Significant
ENSG00000132321	IQCA1	protein_coding	1.48507	-1.0595	2.86332	-0.370026	0.711363	1	Non Significant
ENSG00000291316	ENSG00000291316	protein_coding	14.0155	-1.05938	1.27475	-0.831049	0.405946	0.726259	Non Significant
ENSG00000236104	ZBTB22	protein_coding	395.654	-1.05846	0.152077	-6.96001	3.4024e-12	1.08502e-10	Non Significant
ENSG00000166402	TUB	protein_coding	8.07848	-1.05845	1.36251	-0.776841	0.437253	0.763696	Non Significant
ENSG00000131016	AKAP12	protein_coding	2.01955	-1.0561	1.15949	-0.910828	0.362386	0.67545	Non Significant
ENSG00000234289	H2BC12L	protein_coding	0.479758	-1.05609	2.88321	-0.366289	0.714149	1	Non Significant
ENSG00000089041	P2RX7	protein_coding	1899.42	-1.05597	0.230848	-4.57432	4.77773e-06	5.1174e-05	Non Significant
ENSG00000124091	GCNT7	protein_coding	2.20605	-1.05354	1.27023	-0.829411	0.406872	0.727452	Non Significant
ENSG00000204165	CXorf65	protein_coding	20.7704	-1.05228	0.852095	-1.23494	0.216853	0.469706	Non Significant
ENSG00000166278	C2	protein_coding	399.675	-1.05141	0.191128	-5.50107	3.77488e-08	6.25206e-07	Non Significant
ENSG00000131473	ACLY	protein_coding	6173.41	-1.05076	0.0873067	-12.0352	2.31972e-33	4.56428e-31	Non Significant
ENSG00000133216	EPHB2	protein_coding	411.026	-1.04975	0.16859	-6.22666	4.76497e-10	1.10561e-08	Non Significant
ENSG00000167103	PIP5KL1	protein_coding	52.0419	-1.04949	0.301302	-3.4832	0.000495458	0.00313662	Non Significant
ENSG00000181163	NPM1	protein_coding	16493.5	-1.0483	0.146421	-7.15948	8.09813e-13	2.79542e-11	Non Significant
ENSG00000148604	RGR	protein_coding	0.650593	-1.04818	4.24609	-0.246857	0.805019	1	Non Significant
ENSG00000033178	UBA6	protein_coding	1482.37	-1.04817	0.278306	-3.76623	0.000165728	0.0011819	Non Significant
ENSG00000205301	MGAT4D	protein_coding	0.432029	-1.04781	3.7647	-0.278326	0.780762	1	Non Significant
ENSG00000169064	ZBBX	protein_coding	1.25771	-1.04646	2.87273	-0.364272	0.715655	1	Non Significant
ENSG00000183773	AIFM3	protein_coding	75.1805	-1.04628	0.887331	-1.17913	0.238347	0.503131	Non Significant
ENSG00000263513	FAM72C	protein_coding	324.291	-1.04541	0.204324	-5.11644	3.11348e-07	4.30505e-06	Non Significant
ENSG00000204613	TRIM10	protein_coding	0.456862	-1.04478	3.70684	-0.281852	0.778057	1	Non Significant
ENSG00000145331	TRMT10A	protein_coding	174.595	-1.04373	0.20639	-5.0571	4.25672e-07	5.70864e-06	Non Significant
ENSG00000149926	TLCD3B	protein_coding	27.0545	-1.04177	0.397225	-2.62262	0.00872566	0.0368504	Non Significant
ENSG00000100889	PCK2	protein_coding	1911.1	-1.04118	0.201705	-5.16193	2.44421e-07	3.45242e-06	Non Significant
ENSG00000198467	TPM2	protein_coding	131.735	-1.041	0.316978	-3.28413	0.00102297	0.00582744	Non Significant
ENSG00000133169	BEX1	protein_coding	1642.33	-1.03966	0.177516	-5.85669	4.72186e-09	9.20785e-08	Non Significant
ENSG00000078814	MYH7B	protein_coding	16.6836	-1.03946	0.726266	-1.43123	0.152364	0.362197	Non Significant
ENSG00000155066	PROM2	protein_coding	1.64626	-1.03943	2.35309	-0.441729	0.658686	0.974444	Non Significant
ENSG00000114268	PFKFB4	protein_coding	249.547	-1.03925	0.201526	-5.15691	2.51063e-07	3.53862e-06	Non Significant
ENSG00000112984	KIF20A	protein_coding	735.855	-1.03836	0.178202	-5.82685	5.6485e-09	1.08535e-07	Non Significant
ENSG00000182986	ZNF320	protein_coding	1.67538	-1.03829	1.67536	-0.619745	0.535426	0.865166	Non Significant
ENSG00000112972	HMGCS1	protein_coding	3541.21	-1.03775	0.134889	-7.69334	1.43347e-14	6.09178e-13	Non Significant
ENSG00000196267	ZNF836	protein_coding	14.2628	-1.03689	0.403608	-2.56905	0.0101978	0.041951	Non Significant
ENSG00000153879	CEBPG	protein_coding	2959.99	-1.03683	0.0828651	-12.5122	6.40053e-36	1.48161e-33	Non Significant
ENSG00000159588	CCDC17	protein_coding	22.1277	-1.0361	0.481314	-2.15265	0.0313464	0.104911	Non Significant
ENSG00000165949	IFI27	protein_coding	31.359	-1.03567	0.538302	-1.92395	0.0543613	0.163599	Non Significant
ENSG00000270800	RPS10-NUDT3	protein_coding	651.144	-1.03559	0.209064	-4.95348	7.29e-07	9.30806e-06	Non Significant
ENSG00000117385	P3H1	protein_coding	2169.08	-1.03552	0.0857173	-12.0807	1.33637e-33	2.6831e-31	Non Significant
ENSG00000141401	IMPA2	protein_coding	950.795	-1.03498	0.204503	-5.06095	4.17177e-07	5.603e-06	Non Significant
ENSG00000204963	PCDHA7	protein_coding	0.501637	-1.0349	4.24696	-0.243681	0.807478	1	Non Significant
ENSG00000070886	EPHA8	protein_coding	8.14146	-1.03481	0.963805	-1.07368	0.282968	0.567204	Non Significant
ENSG00000170290	SLN	protein_coding	0.32504	-1.03459	4.07213	-0.254067	0.799444	1	Non Significant
ENSG00000127586	CHTF18	protein_coding	691.532	-1.03444	0.229197	-4.51332	6.38209e-06	6.63009e-05	Non Significant
ENSG00000172572	PDE3A	protein_coding	4.24793	-1.03349	1.38881	-0.744158	0.456781	0.78625	Non Significant
ENSG00000096088	PGC	protein_coding	1.25641	-1.03287	1.81926	-0.56774	0.570211	0.898194	Non Significant
ENSG00000111275	ALDH2	protein_coding	64.0087	-1.03027	0.31297	-3.29192	0.00099507	0.00569157	Non Significant
ENSG00000072778	ACADVL	protein_coding	2615.87	-1.0299	0.14013	-7.34963	1.9876e-13	7.3099e-12	Non Significant
ENSG00000105967	TFEC	protein_coding	1091.69	-1.02975	0.168027	-6.12847	8.87278e-10	1.96158e-08	Non Significant
ENSG00000167380	ZNF226	protein_coding	407.531	-1.02917	0.148509	-6.93004	4.20728e-12	1.3352e-10	Non Significant
ENSG00000146013	GFRA3	protein_coding	4.40418	-1.02872	0.690026	-1.49085	0.136002	0.331965	Non Significant
ENSG00000106080	FKBP14	protein_coding	511.444	-1.02795	0.19022	-5.40402	6.51633e-08	1.02819e-06	Non Significant
ENSG00000204815	ODAD4	protein_coding	5.97723	-1.02628	0.590964	-1.73662	0.0824543	0.227143	Non Significant
ENSG00000120669	SOHLH2	protein_coding	180.01	-1.02628	0.179017	-5.73283	9.87675e-09	1.80777e-07	Non Significant
ENSG00000177943	MAMDC4	protein_coding	26.773	-1.02496	0.433879	-2.36232	0.0181609	0.0674709	Non Significant
ENSG00000119547	ONECUT2	protein_coding	831.959	-1.02492	0.190045	-5.39303	6.92808e-08	1.08792e-06	Non Significant
ENSG00000173166	RAPH1	protein_coding	10.0803	-1.02396	0.922547	-1.10993	0.267029	0.543878	Non Significant
ENSG00000008300	CELSR3	protein_coding	345.1	-1.02313	0.331732	-3.08421	0.0020409	0.0106715	Non Significant
ENSG00000120437	ACAT2	protein_coding	2794.54	-1.02257	0.128321	-7.96887	1.60128e-15	7.48381e-14	Non Significant
ENSG00000164300	SERINC5	protein_coding	325.262	-1.02241	0.194116	-5.26699	1.38682e-07	2.06252e-06	Non Significant
ENSG00000197183	NOL4L	protein_coding	651.31	-1.02027	0.198608	-5.13712	2.79e-07	3.90145e-06	Non Significant
ENSG00000140988	RPS2	protein_coding	32454.2	-1.02	0.248968	-4.09694	4.1865e-05	0.00035399	Non Significant
ENSG00000135519	KCNH3	protein_coding	5.04279	-1.01986	0.913402	-1.11656	0.264184	0.539893	Non Significant
ENSG00000050405	LIMA1	protein_coding	1035.65	-1.01913	0.119856	-8.50299	1.84768e-17	1.03575e-15	Non Significant
ENSG00000049769	PPP1R3F	protein_coding	365.736	-1.01821	0.2153	-4.72926	2.25341e-06	2.58984e-05	Non Significant
ENSG00000171503	ETFDH	protein_coding	690.526	-1.01729	0.108295	-9.39375	5.79033e-21	4.39886e-19	Non Significant
ENSG00000125966	MMP24	protein_coding	5.83548	-1.01725	0.785645	-1.29479	0.195391	0.434901	Non Significant
ENSG00000145287	PLAC8	protein_coding	188.064	-1.01698	0.263295	-3.8625	0.000112232	0.000838312	Non Significant
ENSG00000044090	CUL7	protein_coding	985.474	-1.01662	0.160997	-6.31449	2.71055e-10	6.51193e-09	Non Significant
ENSG00000104980	TIMM44	protein_coding	1500.76	-1.01583	0.129024	-7.87321	3.45653e-15	1.54219e-13	Non Significant
ENSG00000119669	IRF2BPL	protein_coding	1239.82	-1.01575	0.196295	-5.17464	2.28348e-07	3.244e-06	Non Significant
ENSG00000002933	TMEM176A	protein_coding	0.713628	-1.01529	2.55141	-0.397931	0.690681	0.997932	Non Significant
ENSG00000008517	IL32	protein_coding	2878.16	-1.01527	0.199374	-5.09231	3.53736e-07	4.857e-06	Non Significant
ENSG00000204186	ZDBF2	protein_coding	86.7553	-1.0141	1.16689	-0.869065	0.384812	0.70211	Non Significant
ENSG00000064607	SUGP2	protein_coding	5072.45	-1.01305	0.157599	-6.428	1.29295e-10	3.26574e-09	Non Significant
ENSG00000092445	TYRO3	protein_coding	1050.25	-1.01274	0.164747	-6.14724	7.88413e-10	1.75683e-08	Non Significant
ENSG00000186399	GOLGA8R	protein_coding	2387.32	-1.01259	0.242927	-4.1683	3.06885e-05	0.000269928	Non Significant
ENSG00000163577	EIF5A2	protein_coding	245.819	-1.01252	0.30193	-3.35348	0.000798019	0.00473644	Non Significant
ENSG00000181350	LRRC75A	protein_coding	718.194	-1.0113	0.346974	-2.91463	0.00356114	0.0172075	Non Significant
ENSG00000101605	MYOM1	protein_coding	43.7344	-1.01085	0.552904	-1.82825	0.0675119	0.194035	Non Significant
ENSG00000165804	ZNF219	protein_coding	418.996	-1.01024	0.148354	-6.80966	9.78306e-12	2.89897e-10	Non Significant
ENSG00000284906	ENSG00000284906	protein_coding	295.193	-1.00946	0.35804	-2.81941	0.00481125	0.0221649	Non Significant
ENSG00000105245	NUMBL	protein_coding	523.131	-1.00909	0.2437	-4.14071	3.46227e-05	0.000299839	Non Significant
ENSG00000167393	PPP2R3B	protein_coding	885.125	-1.00901	0.178206	-5.66205	1.5e-08	2.65385e-07	Non Significant
ENSG00000162415	ZSWIM5	protein_coding	2.63783	-1.00808	0.824991	-1.22193	0.221733	0.477019	Non Significant
ENSG00000154917	RAB6B	protein_coding	69.8313	-1.00803	0.255017	-3.95279	7.72447e-05	0.000607672	Non Significant
ENSG00000110921	MVK	protein_coding	445.379	-1.00486	0.165544	-6.07005	1.27873e-09	2.75579e-08	Non Significant
ENSG00000171097	KYAT1	protein_coding	225.4	-1.00403	0.177884	-5.64433	1.65822e-08	2.91055e-07	Non Significant
ENSG00000188223	ENSG00000188223	protein_coding	6.36455	-1.00402	1.43731	-0.698541	0.484839	0.814385	Non Significant
ENSG00000130783	CCDC62	protein_coding	52.4464	-1.00395	0.277824	-3.61363	0.000301936	0.00200977	Non Significant
ENSG00000163512	AZI2	protein_coding	1485.43	-1.0029	0.131159	-7.64648	2.06549e-14	8.62859e-13	Non Significant
ENSG00000148377	IDI2	protein_coding	0.671074	-1.00275	2.55158	-0.392991	0.694326	1	Non Significant
ENSG00000160781	PAQR6	protein_coding	145.932	-1.00114	0.322529	-3.10402	0.00190911	0.0100788	Non Significant
ENSG00000170921	TANC2	protein_coding	302.867	-1.00043	0.302206	-3.31043	0.000931532	0.00538449	Non Significant
ENSG00000160808	MYL3	protein_coding	0.615321	-1.00003	4.24656	-0.235492	0.813827	1	Non Significant
ENSG00000198911	SREBF2	protein_coding	6093.87	-0.999295	0.0886068	-11.2779	1.68799e-29	2.4243e-27	Non Significant
ENSG00000166851	PLK1	protein_coding	2125.16	-0.998768	0.15064	-6.63018	3.35287e-11	9.09946e-10	Non Significant
ENSG00000197958	RPL12	protein_coding	12284.2	-0.997849	0.192109	-5.19419	2.05611e-07	2.94654e-06	Non Significant
ENSG00000107262	BAG1	protein_coding	1173.03	-0.997847	0.198931	-5.01604	5.27486e-07	6.94235e-06	Non Significant
ENSG00000164284	GRPEL2	protein_coding	910.852	-0.996844	0.126693	-7.86817	3.59859e-15	1.60194e-13	Non Significant
ENSG00000131650	KREMEN2	protein_coding	93.7181	-0.99646	0.402777	-2.47397	0.0133619	0.0523827	Non Significant
ENSG00000119782	FKBP1B	protein_coding	1.66053	-0.996261	1.18778	-0.83876	0.401604	0.721205	Non Significant
ENSG00000148516	ZEB1	protein_coding	5.49182	-0.995901	1.3924	-0.715241	0.47446	0.803121	Non Significant
ENSG00000225556	C2CD4D	protein_coding	0.976074	-0.995455	3.61704	-0.275212	0.783153	1	Non Significant
ENSG00000184445	KNTC1	protein_coding	2098.86	-0.994816	0.17732	-5.61028	2.01998e-08	3.49254e-07	Non Significant
ENSG00000103740	ACSBG1	protein_coding	118.465	-0.994752	0.291421	-3.41346	0.000641441	0.00392566	Non Significant
ENSG00000240204	SMKR1	protein_coding	15.2732	-0.99387	0.46772	-2.12493	0.0335927	0.110808	Non Significant
ENSG00000140807	NKD1	protein_coding	128.845	-0.992176	0.387871	-2.55801	0.0105273	0.0430099	Non Significant
ENSG00000165323	FAT3	protein_coding	5.33127	-0.992045	1.0967	-0.904577	0.36569	0.679506	Non Significant
ENSG00000120088	CRHR1	protein_coding	2.01722	-0.991897	2.45572	-0.403914	0.686276	0.995369	Non Significant
ENSG00000179921	GPBAR1	protein_coding	4.3174	-0.991106	0.871634	-1.13707	0.25551	0.527205	Non Significant
ENSG00000090013	BLVRB	protein_coding	1104.65	-0.990104	0.226713	-4.36722	1.2584e-05	0.000121374	Non Significant
ENSG00000144834	TAGLN3	protein_coding	1.30134	-0.989648	2.30397	-0.42954	0.66753	0.980766	Non Significant
ENSG00000134294	SLC38A2	protein_coding	14559.3	-0.989408	0.26297	-3.76243	0.00016827	0.001197	Non Significant
ENSG00000242220	TCP10L	protein_coding	11.0387	-0.988289	1.01051	-0.978014	0.328067	0.631239	Non Significant
ENSG00000116691	MIIP	protein_coding	578.212	-0.988052	0.182868	-5.4031	6.54995e-08	1.03267e-06	Non Significant
ENSG00000168779	SHOX2	protein_coding	612.039	-0.987713	0.132767	-7.43945	1.01105e-13	3.84045e-12	Non Significant
ENSG00000152620	NADK2	protein_coding	1568.25	-0.987157	0.431534	-2.28755	0.0221636	0.0790904	Non Significant
ENSG00000100099	HPS4	protein_coding	2750.89	-0.986282	0.198182	-4.97666	6.46925e-07	8.35229e-06	Non Significant
ENSG00000214944	ARHGEF28	protein_coding	83.7283	-0.98627	0.340108	-2.89987	0.00373316	0.0179243	Non Significant
ENSG00000263620	ENSG00000263620	protein_coding	16.8992	-0.985247	0.535148	-1.84107	0.0656108	0.19007	Non Significant
ENSG00000009694	TENM1	protein_coding	2.37829	-0.985139	0.976415	-1.00894	0.313006	0.610922	Non Significant
ENSG00000113272	THG1L	protein_coding	371.472	-0.984643	0.129874	-7.58153	3.41501e-14	1.38544e-12	Non Significant
ENSG00000282939	TRBV7-2	TR_V_gene	23.1915	-0.983829	0.320833	-3.06648	0.00216593	0.0112327	Non Significant
ENSG00000269711	ENSG00000269711	protein_coding	276.426	-0.983823	0.438684	-2.24267	0.0249182	0.0871626	Non Significant
ENSG00000164651	SP8	protein_coding	1.28739	-0.983696	2.86495	-0.343355	0.731331	1	Non Significant
ENSG00000108474	PIGL	protein_coding	259.608	-0.983464	0.158029	-6.2233	4.86794e-10	1.12684e-08	Non Significant
ENSG00000140105	WARS1	protein_coding	4289.82	-0.982444	0.133378	-7.36589	1.75972e-13	6.57005e-12	Non Significant
ENSG00000156958	GALK2	protein_coding	1364.11	-0.981348	0.0996988	-9.84313	7.33905e-23	6.59375e-21	Non Significant
ENSG00000242715	CCDC169	protein_coding	318.193	-0.981189	0.148581	-6.60372	4.00978e-11	1.07782e-09	Non Significant
ENSG00000066044	ELAVL1	protein_coding	3250.55	-0.980704	0.0977422	-10.0336	1.08514e-23	1.06225e-21	Non Significant
ENSG00000114850	SSR3	protein_coding	4531.68	-0.980694	0.12409	-7.90308	2.72091e-15	1.23356e-13	Non Significant
ENSG00000132297	HHLA1	protein_coding	0.560343	-0.980626	4.07311	-0.240756	0.809744	1	Non Significant
ENSG00000180198	RCC1	protein_coding	2726.57	-0.979193	0.117829	-8.31029	9.54679e-17	5.00913e-15	Non Significant
ENSG00000186998	EMID1	protein_coding	67.8546	-0.978933	0.330774	-2.95952	0.0030812	0.0151906	Non Significant
ENSG00000110723	EXPH5	protein_coding	74.3586	-0.978652	0.293636	-3.33287	0.000859545	0.00503645	Non Significant
ENSG00000170275	CRTAP	protein_coding	6255.34	-0.978545	0.15504	-6.31155	2.76262e-10	6.62893e-09	Non Significant
ENSG00000124575	H1-3	protein_coding	2.16017	-0.977918	1.01296	-0.965408	0.33434	0.639246	Non Significant
ENSG00000107731	UNC5B	protein_coding	1.84904	-0.977896	2.01874	-0.484409	0.628096	0.949552	Non Significant
ENSG00000117411	B4GALT2	protein_coding	289.863	-0.977694	0.210612	-4.64217	3.44776e-06	3.81113e-05	Non Significant
ENSG00000183395	PMCH	protein_coding	4.19099	-0.976613	1.44219	-0.677174	0.498296	0.82822	Non Significant
ENSG00000144596	GRIP2	protein_coding	6.84298	-0.976533	1.1094	-0.880239	0.37873	0.695442	Non Significant
ENSG00000189001	SBSN	protein_coding	5.06177	-0.976327	0.834894	-1.1694	0.242242	0.508844	Non Significant
ENSG00000205927	OLIG2	protein_coding	6.18043	-0.975425	0.658447	-1.4814	0.138499	0.336185	Non Significant
ENSG00000128965	CHAC1	protein_coding	61.6788	-0.975253	0.250945	-3.88633	0.000101773	0.000771968	Non Significant
ENSG00000168495	POLR3D	protein_coding	876.79	-0.974589	0.163806	-5.94965	2.68723e-09	5.49054e-08	Non Significant
ENSG00000163810	TGM4	protein_coding	10.9121	-0.974251	0.709262	-1.37361	0.169562	0.391861	Non Significant
ENSG00000113734	BNIP1	protein_coding	164.947	-0.974197	0.229461	-4.2456	2.18014e-05	0.000198594	Non Significant
ENSG00000112473	SLC39A7	protein_coding	3340.09	-0.973925	0.155629	-6.25798	3.89986e-10	9.17604e-09	Non Significant
ENSG00000169902	TPST1	protein_coding	184.138	-0.973873	0.231183	-4.21257	2.52486e-05	0.000226742	Non Significant
ENSG00000160752	FDPS	protein_coding	4025.59	-0.973541	0.163527	-5.9534	2.62627e-09	5.37156e-08	Non Significant
ENSG00000006634	DBF4	protein_coding	1501.96	-0.97343	0.149151	-6.52647	6.73399e-11	1.76359e-09	Non Significant
ENSG00000180817	PPA1	protein_coding	3274.83	-0.972939	0.158987	-6.1196	9.38109e-10	2.06468e-08	Non Significant
ENSG00000179058	C9orf50	protein_coding	1.09243	-0.972459	2.48601	-0.391173	0.695669	1	Non Significant
ENSG00000179363	TMEM31	protein_coding	3.49957	-0.972297	0.889423	-1.09318	0.274316	0.554208	Non Significant
ENSG00000043143	JADE2	protein_coding	2196.44	-0.971904	0.169741	-5.72582	1.02936e-08	1.8713e-07	Non Significant
ENSG00000139209	SLC38A4	protein_coding	2.61315	-0.971573	1.34413	-0.722825	0.469788	0.798597	Non Significant
ENSG00000119915	ELOVL3	protein_coding	25.2648	-0.971462	0.457553	-2.12317	0.03374	0.111182	Non Significant
ENSG00000130513	GDF15	protein_coding	24.7352	-0.971308	0.626171	-1.55119	0.120857	0.303283	Non Significant
ENSG00000101444	AHCY	protein_coding	3054.83	-0.969911	0.236355	-4.10362	4.06735e-05	0.000345997	Non Significant
ENSG00000116095	PLEKHA3	protein_coding	537.368	-0.969907	0.255851	-3.79091	0.000150099	0.0010842	Non Significant
ENSG00000153832	FBXO36	protein_coding	102.55	-0.968545	0.199388	-4.85758	1.1883e-06	1.44864e-05	Non Significant
ENSG00000102316	MAGED2	protein_coding	2266.28	-0.967805	0.112328	-8.61585	6.94245e-18	4.06547e-16	Non Significant
ENSG00000183783	KCTD8	protein_coding	1.3947	-0.967073	2.7843	-0.347331	0.728343	1	Non Significant
ENSG00000074211	PPP2R2C	protein_coding	3.78836	-0.966391	1.30209	-0.742185	0.457975	0.78741	Non Significant
ENSG00000215784	FAM72D	protein_coding	311.016	-0.965456	0.179247	-5.38616	7.2e-08	1.124e-06	Non Significant
ENSG00000149485	FADS1	protein_coding	3208.8	-0.965329	0.108404	-8.90488	5.34446e-19	3.42533e-17	Non Significant
ENSG00000196305	IARS1	protein_coding	5332.59	-0.965187	0.122523	-7.87763	3.33647e-15	1.49201e-13	Non Significant
ENSG00000123136	DDX39A	protein_coding	3813.72	-0.964687	0.131379	-7.34278	2.09206e-13	7.67973e-12	Non Significant
ENSG00000243927	MRPS6	protein_coding	3673.01	-0.964098	0.383563	-2.51354	0.0119528	0.0477722	Non Significant
ENSG00000131351	HAUS8	protein_coding	401.03	-0.964093	0.151267	-6.37345	1.84828e-10	4.54584e-09	Non Significant
ENSG00000289720	ENSG00000289720	protein_coding	38.7995	-0.963965	0.714003	-1.35009	0.176989	0.405028	Non Significant
ENSG00000101464	PIGU	protein_coding	482.437	-0.963789	0.14936	-6.4528	1.09802e-10	2.79853e-09	Non Significant
ENSG00000174175	SELP	protein_coding	2.12847	-0.963682	1.19235	-0.808219	0.418964	0.742796	Non Significant
ENSG00000177752	YIPF7	protein_coding	1.40252	-0.963644	1.57809	-0.61064	0.541438	0.871011	Non Significant
ENSG00000151923	TIAL1	protein_coding	3070.94	-0.962269	0.129165	-7.44992	9.33995e-14	3.5684e-12	Non Significant
ENSG00000085662	AKR1B1	protein_coding	1.06542	-0.961228	2.97292	-0.323327	0.746447	1	Non Significant
ENSG00000141086	CTRL	protein_coding	17.3671	-0.960775	0.458661	-2.09474	0.0361944	0.117771	Non Significant
ENSG00000154027	AK5	protein_coding	106.865	-0.960626	0.328555	-2.92379	0.00345795	0.0167789	Non Significant
ENSG00000196296	ATP2A1	protein_coding	51.0936	-0.957845	0.42877	-2.23394	0.0254872	0.0888057	Non Significant
ENSG00000124159	MATN4	protein_coding	25.2547	-0.954758	0.405296	-2.35571	0.0184875	0.0684146	Non Significant
ENSG00000136938	ANP32B	protein_coding	3688.9	-0.954063	0.182856	-5.21755	1.81301e-07	2.63074e-06	Non Significant
ENSG00000253313	C1orf210	protein_coding	0.645223	-0.953626	2.14945	-0.44366	0.657288	0.973709	Non Significant
ENSG00000285854	ENSG00000285854	protein_coding	1.59333	-0.953443	1.44468	-0.659968	0.509274	0.840382	Non Significant
ENSG00000147234	FRMPD3	protein_coding	2.41296	-0.953113	1.51111	-0.630738	0.528212	0.858347	Non Significant
ENSG00000205090	TMEM240	protein_coding	5.38647	-0.952942	0.677102	-1.40738	0.159314	0.374333	Non Significant
ENSG00000108106	UBE2S	protein_coding	2977.03	-0.952068	0.220304	-4.32161	1.54898e-05	0.000146457	Non Significant
ENSG00000176490	DIRAS1	protein_coding	15.3749	-0.950926	0.478631	-1.98676	0.0469486	0.1452	Non Significant
ENSG00000112212	TSPO2	protein_coding	0.566393	-0.949425	1.99294	-0.476394	0.633794	0.954417	Non Significant
ENSG00000172840	PDP2	protein_coding	1362.77	-0.949415	0.14588	-6.5082	7.60576e-11	2e-09	Non Significant
ENSG00000270276	H4C15	protein_coding	34.5043	-0.948953	1.15717	-0.820064	0.41218	0.734252	Non Significant
ENSG00000150722	PPP1R1C	protein_coding	7.08965	-0.948906	1.31955	-0.719113	0.472071	0.800863	Non Significant
ENSG00000126602	TRAP1	protein_coding	1803.81	-0.948244	0.197999	-4.78914	1.675e-06	1.98179e-05	Non Significant
ENSG00000169860	P2RY1	protein_coding	2.96365	-0.947394	0.951689	-0.995487	0.319499	0.61968	Non Significant
ENSG00000187479	C11orf96	protein_coding	12.6345	-0.947138	0.43849	-2.16	0.0307727	0.103343	Non Significant
ENSG00000286185	ENSG00000286185	protein_coding	99.4019	-0.947136	1.47521	-0.642034	0.520851	0.851959	Non Significant
ENSG00000006534	ALDH3B1	protein_coding	1227.48	-0.947073	0.198913	-4.76125	1.924e-06	2.24531e-05	Non Significant
ENSG00000278023	RDM1	protein_coding	65.6309	-0.946679	0.37707	-2.51062	0.0120521	0.0481104	Non Significant
ENSG00000118276	B4GALT6	protein_coding	312.786	-0.946591	0.392477	-2.41184	0.0158723	0.0602555	Non Significant
ENSG00000176222	ZNF404	protein_coding	1.26133	-0.944155	1.11391	-0.847607	0.396657	0.715561	Non Significant
ENSG00000164615	CAMLG	protein_coding	1320.57	-0.943973	0.126719	-7.44931	9.38275e-14	3.57781e-12	Non Significant
ENSG00000205269	TMEM170B	protein_coding	1883.84	-0.943139	0.235286	-4.00848	6.11102e-05	0.000495021	Non Significant
ENSG00000137392	CLPS	protein_coding	0.0806818	-0.942966	4.24723	-0.222019	0.824299	1	Non Significant
ENSG00000167419	LPO	protein_coding	34.8185	-0.942807	0.358652	-2.62875	0.00856998	0.0362864	Non Significant
ENSG00000179889	PDXDC1	protein_coding	2642.96	-0.942138	0.111053	-8.48367	2.18197e-17	1.21967e-15	Non Significant
ENSG00000041982	TNC	protein_coding	12.298	-0.942044	0.858891	-1.09681	0.272723	0.552181	Non Significant
ENSG00000168672	LRATD2	protein_coding	178.648	-0.941868	0.30676	-3.07038	0.00213787	0.0111062	Non Significant
ENSG00000089723	OTUB2	protein_coding	70.2077	-0.941548	0.399983	-2.35397	0.0185741	0.0686834	Non Significant
ENSG00000165799	RNASE7	protein_coding	0.460663	-0.941374	4.24722	-0.221644	0.824591	1	Non Significant
ENSG00000203908	KHDC3L	protein_coding	1.7092	-0.940921	0.997948	-0.942856	0.345755	0.653604	Non Significant
ENSG00000155719	OTOA	protein_coding	11.2439	-0.940841	0.775777	-1.21277	0.225217	0.482772	Non Significant
ENSG00000249209	ENSG00000249209	protein_coding	5.61137	-0.940747	0.881637	-1.06705	0.285951	0.571437	Non Significant
ENSG00000259529	ENSG00000259529	protein_coding	46.0941	-0.940159	0.695854	-1.35109	0.176668	0.404482	Non Significant
ENSG00000105642	KCNN1	protein_coding	11.3292	-0.939519	0.666726	-1.40915	0.15879	0.373369	Non Significant
ENSG00000285480	H2BK1	protein_coding	1.07981	-0.938922	1.22149	-0.768669	0.44209	0.769579	Non Significant
ENSG00000176125	UFSP1	protein_coding	30.1493	-0.937807	0.388523	-2.41378	0.0157882	0.059994	Non Significant
ENSG00000105486	LIG1	protein_coding	1465.24	-0.937386	0.122675	-7.64122	2.15179e-14	8.97004e-13	Non Significant
ENSG00000143228	NUF2	protein_coding	697.146	-0.936886	0.195716	-4.78696	1.69324e-06	1.99618e-05	Non Significant
ENSG00000144847	IGSF11	protein_coding	0.390214	-0.936876	4.24722	-0.220586	0.825415	1	Non Significant
ENSG00000261796	ISY1-RAB43	protein_coding	398.967	-0.936836	0.183032	-5.11842	3.08106e-07	4.27524e-06	Non Significant
ENSG00000174844	DNAH12	protein_coding	10.579	-0.93659	0.86383	-1.08423	0.278263	0.560515	Non Significant
ENSG00000146410	MTFR2	protein_coding	604.413	-0.936534	0.167634	-5.58679	2.31308e-08	3.9507e-07	Non Significant
ENSG00000204345	CD300LD	protein_coding	0.342833	-0.936339	3.47305	-0.269601	0.787467	1	Non Significant
ENSG00000168297	PXK	protein_coding	3607.45	-0.936084	0.0968477	-9.66552	4.22462e-22	3.55229e-20	Non Significant
ENSG00000128617	OPN1SW	protein_coding	0.278134	-0.935705	4.23906	-0.220734	0.825299	1	Non Significant
ENSG00000124134	KCNS1	protein_coding	5.46404	-0.934894	0.885526	-1.05575	0.291083	0.578949	Non Significant
ENSG00000221916	C19orf73	protein_coding	16.6948	-0.93423	0.447856	-2.086	0.0369782	0.119984	Non Significant
ENSG00000181790	ADGRB1	protein_coding	205.437	-0.934186	0.508947	-1.83553	0.0664276	0.191834	Non Significant
ENSG00000179532	DNHD1	protein_coding	552.135	-0.934045	0.233308	-4.00348	6.24163e-05	0.000504009	Non Significant
ENSG00000105835	NAMPT	protein_coding	1479.78	-0.933293	0.106392	-8.77219	1.75228e-18	1.08421e-16	Non Significant
ENSG00000102409	BEX4	protein_coding	35.0505	-0.932931	0.340999	-2.73588	0.00622145	0.0276515	Non Significant
ENSG00000214491	SEC14L6	protein_coding	0.429633	-0.932564	4.24722	-0.21957	0.826206	1	Non Significant
ENSG00000166578	IQCD	protein_coding	7.00472	-0.931526	0.515588	-1.80673	0.070805	0.20139	Non Significant
ENSG00000175311	ANKS4B	protein_coding	1.43128	-0.931327	1.47258	-0.632444	0.527097	0.857404	Non Significant
ENSG00000135451	TROAP	protein_coding	539.454	-0.931138	0.170328	-5.46675	4.58368e-08	7.46e-07	Non Significant
ENSG00000205643	CDPF1	protein_coding	91.3189	-0.930009	0.239399	-3.88477	0.000102427	0.000775137	Non Significant
ENSG00000169093	ASMTL	protein_coding	678.655	-0.929181	0.19028	-4.88322	1.04367e-06	1.29315e-05	Non Significant
ENSG00000119411	BSPRY	protein_coding	288.289	-0.929085	0.142899	-6.50169	7.94246e-11	2.05897e-09	Non Significant
ENSG00000188394	GPR21	protein_coding	0.587281	-0.928235	3.04861	-0.304479	0.760763	1	Non Significant
ENSG00000174502	SLC26A9	protein_coding	1019.47	-0.92807	0.203725	-4.5555	5.226e-06	5.55819e-05	Non Significant
ENSG00000186891	TNFRSF18	protein_coding	0.998104	-0.928041	2.26406	-0.409902	0.681878	0.992043	Non Significant
ENSG00000142235	LMTK3	protein_coding	191.069	-0.926153	0.278805	-3.32186	0.000894198	0.00519816	Non Significant
ENSG00000183336	BOLA2	protein_coding	293.529	-0.926102	0.367133	-2.52252	0.0116516	0.0467394	Non Significant
ENSG00000156968	MPV17L	protein_coding	0.846536	-0.925331	2.71447	-0.340889	0.733187	1	Non Significant
ENSG00000145623	OSMR	protein_coding	4.76145	-0.924942	1.1698	-0.790682	0.42913	0.754687	Non Significant
ENSG00000145990	GFOD1	protein_coding	405.874	-0.924602	0.170413	-5.42566	5.77405e-08	9.19177e-07	Non Significant
ENSG00000011052	NME1-NME2	protein_coding	464.778	-0.924484	0.256843	-3.59941	0.00031894	0.00211011	Non Significant
ENSG00000004838	ZMYND10	protein_coding	29.8964	-0.924338	0.396975	-2.32845	0.0198881	0.0725738	Non Significant
ENSG00000184058	TBX1	protein_coding	6.08378	-0.923904	1.32159	-0.699086	0.484499	0.81402	Non Significant
ENSG00000169972	PUSL1	protein_coding	268.726	-0.923779	0.227468	-4.06114	4.88337e-05	0.000404569	Non Significant
ENSG00000185838	GNB1L	protein_coding	291.875	-0.923335	0.265857	-3.47305	0.000514584	0.00324622	Non Significant
ENSG00000168488	ATXN2L	protein_coding	3950.16	-0.922945	0.179817	-5.1327	2.85618e-07	3.98852e-06	Non Significant
ENSG00000206052	DOK6	protein_coding	3.81244	-0.921888	1.39746	-0.659689	0.509453	0.840382	Non Significant
ENSG00000144674	GOLGA4	protein_coding	2812.03	-0.921482	0.221311	-4.16373	3.13084e-05	0.000274888	Non Significant
ENSG00000160318	CLDND2	protein_coding	5.82763	-0.921	0.7961	-1.15689	0.247317	0.515726	Non Significant
ENSG00000176510	OR10AC1	protein_coding	3.18558	-0.919707	0.812783	-1.13155	0.257823	0.530585	Non Significant
ENSG00000148832	PAOX	protein_coding	0.860143	-0.919587	4.2471	-0.216521	0.828582	1	Non Significant
ENSG00000131187	F12	protein_coding	72.2777	-0.918984	0.358426	-2.56394	0.0103491	0.0424315	Non Significant
ENSG00000130720	FIBCD1	protein_coding	12.1863	-0.918902	1.37062	-0.670429	0.502584	0.833151	Non Significant
ENSG00000167194	C16orf92	protein_coding	0.149499	-0.918744	4.24368	-0.216497	0.8286	1	Non Significant
ENSG00000203995	ZYG11A	protein_coding	47.814	-0.918015	1.20652	-0.760879	0.446729	0.774572	Non Significant
ENSG00000111907	TPD52L1	protein_coding	17.1671	-0.917918	0.370027	-2.48068	0.0131134	0.0515728	Non Significant
ENSG00000127578	WFIKKN1	protein_coding	35.1962	-0.917684	0.473778	-1.93695	0.0527518	0.159635	Non Significant
ENSG00000112511	PHF1	protein_coding	507.475	-0.917612	0.204408	-4.48912	7.15173e-06	7.3597e-05	Non Significant
ENSG00000111058	ACSS3	protein_coding	6.1989	-0.917412	1.44833	-0.633429	0.526454	0.856703	Non Significant
ENSG00000114054	PCCB	protein_coding	1131.65	-0.916992	0.137888	-6.65027	2.92552e-11	7.98372e-10	Non Significant
ENSG00000250709	CCDC169-SOHLH2	protein_coding	12.5287	-0.916876	0.91855	-0.998177	0.318194	0.617799	Non Significant
ENSG00000149582	TMEM25	protein_coding	15.0158	-0.915988	0.647918	-1.41374	0.157438	0.371244	Non Significant
ENSG00000256269	HMBS	protein_coding	519.434	-0.915842	0.185467	-4.93803	7.89156e-07	1.00048e-05	Non Significant
ENSG00000183230	CTNNA3	protein_coding	11.3896	-0.915835	0.77587	-1.1804	0.237842	0.502499	Non Significant
ENSG00000124491	F13A1	protein_coding	95.7837	-0.915684	0.318429	-2.87563	0.00403217	0.019145	Non Significant
ENSG00000198039	ZNF273	protein_coding	256.67	-0.914987	0.184565	-4.95753	7.1394e-07	9.13955e-06	Non Significant
ENSG00000137878	GCOM1	protein_coding	6.96892	-0.914551	1.15374	-0.792685	0.427962	0.753473	Non Significant
ENSG00000116885	OSCP1	protein_coding	8.65057	-0.913868	0.66212	-1.38022	0.16752	0.38834	Non Significant
ENSG00000204396	VWA7	protein_coding	13.5445	-0.913675	0.721729	-1.26595	0.20553	0.451692	Non Significant
ENSG00000077264	PAK3	protein_coding	3.56909	-0.913655	0.922874	-0.990011	0.322169	0.623242	Non Significant
ENSG00000159403	C1R	protein_coding	54.962	-0.913594	0.320045	-2.85458	0.00430935	0.0202165	Non Significant
ENSG00000182685	BRICD5	protein_coding	40.4651	-0.91257	0.386563	-2.36073	0.018239	0.0676477	Non Significant
ENSG00000065150	IPO5	protein_coding	7277.99	-0.912442	0.0961377	-9.49098	2.2887e-21	1.8013e-19	Non Significant
ENSG00000029639	TFB1M	protein_coding	553.48	-0.912296	0.144296	-6.32239	2.57549e-10	6.21022e-09	Non Significant
ENSG00000173848	NET1	protein_coding	1264.27	-0.911479	0.132505	-6.87882	6.03488e-12	1.85825e-10	Non Significant
ENSG00000198488	B3GNT6	protein_coding	0.764874	-0.911365	1.84486	-0.494003	0.621304	0.944071	Non Significant
ENSG00000186453	FAM228A	protein_coding	17.1692	-0.910653	0.325719	-2.79582	0.00517677	0.0236385	Non Significant
ENSG00000169241	SLC50A1	protein_coding	803.909	-0.909769	0.145824	-6.23883	4.40855e-10	1.02776e-08	Non Significant
ENSG00000109846	CRYAB	protein_coding	2.66668	-0.909582	1.056	-0.861345	0.389048	0.706177	Non Significant
ENSG00000063241	ISOC2	protein_coding	855.023	-0.907463	0.217177	-4.17844	2.93509e-05	0.000260256	Non Significant
ENSG00000243678	NME2	protein_coding	5937.07	-0.90707	0.203866	-4.44935	8.61325e-06	8.67764e-05	Non Significant
ENSG00000119777	TMEM214	protein_coding	2125.04	-0.907064	0.10715	-8.46535	2.55394e-17	1.41953e-15	Non Significant
ENSG00000143184	XCL1	protein_coding	1.97242	-0.906772	1.16895	-0.775713	0.437918	0.764686	Non Significant
ENSG00000211714	TRBV7-3	TR_V_gene	3.02534	-0.905927	0.773109	-1.1718	0.241278	0.507308	Non Significant
ENSG00000198826	ARHGAP11A	protein_coding	2480.5	-0.905826	0.218655	-4.14271	3.43223e-05	0.000297763	Non Significant
ENSG00000113327	GABRG2	protein_coding	1.42965	-0.905803	1.77891	-0.509189	0.61062	0.935703	Non Significant
ENSG00000040608	RTN4R	protein_coding	190.696	-0.905198	0.227766	-3.97424	7.06051e-05	0.00056244	Non Significant
ENSG00000069535	MAOB	protein_coding	0.697935	-0.904982	4.24722	-0.213076	0.831268	1	Non Significant
ENSG00000159899	NPR2	protein_coding	8.23142	-0.9049	0.674373	-1.34184	0.179648	0.40978	Non Significant
ENSG00000178440	TIMM23B-AGAP6	protein_coding	69.189	-0.904893	0.395167	-2.2899	0.0220271	0.0786865	Non Significant
ENSG00000139725	RHOF	protein_coding	804.401	-0.904583	0.144068	-6.27887	3.41043e-10	8.08478e-09	Non Significant
ENSG00000170909	OSCAR	protein_coding	592.726	-0.903391	0.211509	-4.27118	1.94443e-05	0.000179533	Non Significant
ENSG00000198952	SMG5	protein_coding	3017.43	-0.903142	0.147198	-6.13554	8.48694e-10	1.87839e-08	Non Significant
ENSG00000048545	GUCA1A	protein_coding	0.962276	-0.90278	1.71901	-0.525175	0.599462	0.92571	Non Significant
ENSG00000180089	TMEM86B	protein_coding	125.403	-0.902501	0.23337	-3.86725	0.000110071	0.000824109	Non Significant
ENSG00000161594	KLHL10	protein_coding	0.73101	-0.90225	2.69939	-0.334243	0.738196	1	Non Significant
ENSG00000137273	FOXF2	protein_coding	36.0067	-0.901758	0.476824	-1.89118	0.058601	0.173597	Non Significant
ENSG00000132749	TESMIN	protein_coding	434.79	-0.901757	0.157182	-5.73703	9.63536e-09	1.76523e-07	Non Significant
ENSG00000204022	LIPJ	protein_coding	43.8446	-0.901236	0.371679	-2.42477	0.015318	0.058467	Non Significant
ENSG00000103335	PIEZO1	protein_coding	3666.73	-0.900416	0.231528	-3.88902	0.000100648	0.000765208	Non Significant
ENSG00000166831	RBPMS2	protein_coding	0.296274	-0.899957	4.24722	-0.211893	0.83219	1	Non Significant
ENSG00000274512	TBC1D3L	protein_coding	376.177	-0.899736	0.236658	-3.80184	0.000143627	0.00104307	Non Significant
ENSG00000125798	FOXA2	protein_coding	1.54063	-0.899494	2.01143	-0.447192	0.654737	0.97147	Non Significant
ENSG00000167658	EEF2	protein_coding	83816.1	-0.899192	0.164424	-5.46873	4.53282e-08	7.40148e-07	Non Significant
ENSG00000143179	UCK2	protein_coding	1360.89	-0.899032	0.156827	-5.73263	9.88858e-09	1.80825e-07	Non Significant
ENSG00000134594	RAB33A	protein_coding	586.472	-0.897723	0.175439	-5.11702	3.10408e-07	4.29507e-06	Non Significant
ENSG00000111325	OGFOD2	protein_coding	241.793	-0.897432	0.211313	-4.24693	2.16722e-05	0.000197693	Non Significant
ENSG00000134909	ARHGAP32	protein_coding	1657.24	-0.897205	0.199088	-4.50659	6.5879e-06	6.8187e-05	Non Significant
ENSG00000264343	NOTCH2NLA	protein_coding	507.505	-0.896874	0.183029	-4.90017	9.57531e-07	1.19318e-05	Non Significant
ENSG00000180210	F2	protein_coding	0.969128	-0.895955	2.88523	-0.310531	0.756157	1	Non Significant
ENSG00000099617	EFNA2	protein_coding	1.22545	-0.895389	1.89647	-0.472134	0.636831	0.956949	Non Significant
ENSG00000180900	SCRIB	protein_coding	417.4	-0.895137	0.209569	-4.27132	1.94316e-05	0.000179508	Non Significant
ENSG00000183621	ZNF438	protein_coding	882.319	-0.895096	0.143957	-6.21781	5.04147e-10	1.16427e-08	Non Significant
ENSG00000187902	SHISA7	protein_coding	3.14945	-0.89429	1.04933	-0.852246	0.394077	0.712458	Non Significant
ENSG00000186185	KIF18B	protein_coding	774.203	-0.89419	0.230208	-3.88428	0.000102634	0.000776108	Non Significant
ENSG00000163516	ANKZF1	protein_coding	664.965	-0.894113	0.149134	-5.99537	2e-09	4.20926e-08	Non Significant
ENSG00000126950	TMEM35A	protein_coding	0.572744	-0.893948	4.24235	-0.21072	0.833106	1	Non Significant
ENSG00000127325	BEST3	protein_coding	0.761138	-0.892942	2.57403	-0.346904	0.728663	1	Non Significant
ENSG00000106415	GLCCI1	protein_coding	1211.55	-0.892639	0.180559	-4.94376	7.663e-07	9.75126e-06	Non Significant
ENSG00000186723	OR10H1	protein_coding	0.611459	-0.891868	3.96466	-0.224955	0.822015	1	Non Significant
ENSG00000211721	TRBV6-5	TR_V_gene	0.547238	-0.891332	2.65912	-0.335198	0.737476	1	Non Significant
ENSG00000107833	NPM3	protein_coding	962.161	-0.889605	0.227051	-3.91809	8.92544e-05	0.000688154	Non Significant
ENSG00000254997	KRTAP5-9	protein_coding	3.17656	-0.888713	0.806657	-1.10172	0.270582	0.549032	Non Significant
ENSG00000213347	MXD3	protein_coding	425.91	-0.888695	0.21002	-4.23148	2.32159e-05	0.000210117	Non Significant
ENSG00000167554	ZNF610	protein_coding	1.61819	-0.888596	1.08796	-0.816753	0.414069	0.736306	Non Significant
ENSG00000141434	MEP1B	protein_coding	0.625874	-0.887783	1.93862	-0.457946	0.646991	0.965058	Non Significant
[truncated: 18,994 more rows]

## Sheet: MdU1_DMSO_vs_MdU937_DMSO
ID	GeneName	BioType	baseMean	log2FoldChange	lfcSE	stat	pvalue	padj	Significance
[truncated: 20,458 more rows]

[truncated: 2 more sheets: MdU1_PMA_vs_MdU937_PMA, Unique genes in PMA MdU1]
